# Supplementary material for: Obesity-like metabolic signatures in females: from birth to weaning in a mammalian model
Source: Research Square preprint supplement (doi:10.21203/rs.3.rs-7381399/v1), 2026-02-10
Supplement: Supplementary file 1 [file 62e6140ed85c9e02cbc47427.xlsx]

## Sheet: Hoja1
NUMBER	SAMPLE	Sample_no	MOTHER	PARTO/DESTETE	LINEA	Interaction	0.54/271.9172	0.56/94.0455	0.56/266.0177	0.56/73.5322	0.56/102.5354	0.56/111.0104	0.56/152.0372	0.56/81.5209	0.56/151.0356	0.56/414.8855	0.56/296.9705	0.56/153.0334	0.56/112.0065	0.56/97.9917	0.56/371.9189	0.56/280.9943	0.56/167.0134	0.56/61.0076	0.56/125.9867	0.56/110.0090	0.56/223.9899	0.56/84.9599	0.56/265.0163	0.56/255.9448	0.56/239.9673	0.56/198.9404	0.56/214.9181	0.56/225.9877	0.56/328.8991	0.56/369.9255	0.56/458.8567	0.57/442.8823	0.57/344.8758	0.57/385.9030	0.57/474.8347	0.57/353.9479	0.59/396.8857	0.59/412.8640	0.59/282.9056	0.59/152.9478	0.59/334.9161	0.59/350.8928	0.59/402.9031
1	Plasma_001_pos_025	1	65	PARTO	RV18	PARTORV18	2621	829	713	4494	1322	266	1876	28786	13319	821	464	857	761	2158	581	1405	30419	11300	57753	5694	6956	5002	2347	40016	28669	3293	18224	1183	2882	3215	3366	2162	5181	12018	3450	834	833	1138	1871	1319	886	2432	1303
2	Plasma_002_pos_026	2	67	PARTO	RV18	PARTORV18	2430	1159	875	4768	1103	1096	1304	59672	9615	1767	973	462	1587	561	1307	1957	13196	5689	57248	8239	10208	7887	3461	38597	33933	5973	17343	3127	1741	1674	3262	2612	5749	11686	3885	268	895	1008	1861	1215	1056	2265	1534
3	Plasma_003_pos_027	3	69	PARTO	RV18	PARTORV18	1861	1077	1179	1508	561	2331	3885	55611	20069	478	541	658	2927	681	2066	3294	13393	10186	52486	8929	14603	3291	2571	32157	37378	6356	14551	1878	3879	6797	4290	1811	6670	9251	3026	349	927	705	1527	1152	1111	1915	1619
4	Plasma_004_pos_028	4	73	PARTO	RV18	PARTORV18	2634	616	405	1650	368	1061	1385	52826	2507	221	1623	1955	744	1714	758	854	13032	5623	48283	10379	5077	6296	1813	30446	21243	3482	13109	1535	1409	2254	1840	563	2973	5430	2444	266	636	899	1495	1090	778	2103	1134
5	Plasma_005_pos_029	5	115	PARTO	RV18	PARTORV18	2330	1423	200	5008	661	423	1400	56613	11187	422	1807	505	1244	1883	625	897	18471	5694	51797	9769	4550	6808	1055	34048	21525	1863	15056	1310	1264	2677	1963	962	4277	6585	3012	118	646	1126	1708	1144	801	2208	988
6	Plasma_006_pos_031	6	119	PARTO	RV18	PARTORV18	2248	863	840	3910	1159	1163	1234	59864	7441	1420	1206	1724	836	1631	1107	2583	30216	6908	56015	12356	7121	7624	2366	37936	28457	4777	17051	2210	2648	5014	2979	307	7775	11053	2975	409	896	1125	1865	1225	1000	2383	1328
7	Plasma_007_pos_032	7	123	PARTO	RV18	PARTORV18	2847	1266	405	5924	673	1185	1370	59875	8469	766	538	713	1065	760	1123	1487	30596	4112	56657	12172	3199	3787	2403	38597	27850	4593	17361	2082	1423	5065	4386	1221	8031	11560	2744	489	782	1023	1829	1174	901	2301	1175
9	Plasma_009_pos_034	9	133	PARTO	RV18	PARTORV18	2052	3049	556	9550	740	1339	595	27928	15286	273	742	1012	793	2361	977	1396	17497	10212	52997	13592	8259	7010	2870	34014	28976	4773	14788	1373	2013	3438	2915	1336	6663	9716	4192	308	809	917	1608	1109	945	2019	1308
10	Plasma_010_pos_035	10	137	PARTO	RV18	PARTORV18	2576	798	306	8605	1791	915	1214	53404	14086	753	1622	1223	796	3377	823	871	27574	9884	49466	12262	6686	6475	2344	31242	24936	2068	6649	1992	1595	2758	2054	1013	5760	8447	2392	609	701	869	1598	1119	897	2039	1210
11	Plasma_011_pos_037	11	139	PARTO	RV18	PARTORV18	2180	3070	765	1186	1333	616	1645	30225	8835	977	1089	846	1022	3436	976	1024	29910	10827	31388	13813	8798	7542	3134	37518	31627	3166	16773	1470	1690	4099	4860	2403	7696	11128	3349	503	860	991	1736	1218	938	2187	1390
12	Plasma_012_pos_038	12	65	DESTETE	RV18	DESTETERV18	2223	1606	887	9095	1451	971	1795	39785	8848	1169	1236	749	1922	1687	1208	1500	31314	11238	58525	12987	7857	7878	1642	41355	31390	5200	18428	1353	3128	3073	1623	2474	6145	12357	3766	241	849	1235	2056	1268	1012	2570	1445
13	Plasma_013_pos_039	13	67	DESTETE	RV18	DESTETERV18	2672	536	371	5133	736	1642	1956	38271	9137	932	421	1554	966	682	623	1726	13223	5708	57785	9648	9169	7895	3237	40209	33304	5626	17864	2967	3379	6020	3147	1590	8430	12056	3462	333	963	1156	1947	1281	1063	2526	1537
14	Plasma_014_pos_040	14	69	DESTETE	RV18	DESTETERV18	1575	1352	498	4670	886	1552	814	64572	9610	936	2158	958	1107	1291	852	2887	31887	5742	61248	8873	8114	8326	2865	43811	33295	2229	20222	2663	3325	3897	5517	2032	5388	13760	6426	266	950	1286	2051	1317	953	2583	1375
15	Plasma_015_pos_041	15	73	DESTETE	RV18	DESTETERV18	2482	592	734	10262	904	955	839	55937	16281	1092	1119	1321	997	1289	1738	2728	16619	5427	52570	9944	9030	3422	2030	34066	30951	5158	14824	2812	1760	3965	3312	2195	3650	9812	3021	762	863	908	1551	1137	1001	2077	1388
16	Plasma_016_pos_048	16	115	DESTETE	RV18	DESTETERV18	1990	1065	924	7252	2016	2563	726	62264	7965	1453	1133	983	1183	840	2042	3148	17880	11610	58655	15206	10624	8066	3762	40804	36020	6202	18492	3395	2481	4708	4179	1519	8855	6934	3947	819	1023	1113	1985	1377	1158	2558	1758
17	Plasma_017_pos_049	17	119	DESTETE	RV18	DESTETERV18	1926	3743	2112	14099	523	1393	733	50480	14463	311	736	1163	3011	2071	1088	1711	13708	9306	47652	19882	16696	6370	3057	28105	37290	6319	12236	5372	2049	3230	3683	2702	3803	3743	2018	2324	951	655	1394	1026	1351	1873	1944
18	Plasma_018_pos_050	18	123	DESTETE	RV18	DESTETERV18	2660	2644	608	5412	927	315	335	64145	8420	695	500	945	252	1568	1021	902	32149	11884	60383	12811	7855	5297	2741	22336	32703	5453	19916	2498	958	5742	3819	1486	9534	6584	4376	316	951	1350	2131	1394	1057	2764	1509
19	Plasma_019_pos_051	19	129	DESTETE	RV18	DESTETERV18	1973	1420	350	8469	784	544	1396	59887	8823	429	1143	1135	1279	796	754	1638	30392	10936	55234	8203	6743	7488	1082	38717	27465	4460	16757	1974	647	4846	2761	418	7682	6814	2947	349	847	1146	1872	1246	943	2444	1340
20	Plasma_020_pos_052	20	133	DESTETE	RV18	DESTETERV18	1835	3910	834	8559	1098	2086	2550	54722	10042	1298	1024	778	1020	1525	1966	3198	12272	10050	50908	16736	12271	4946	4530	32340	34473	2499	7895	3766	2504	3458	3720	2615	2058	5454	2535	850	946	784	1574	1143	1262	2054	1673
21	Plasma_021_pos_054	21	137	DESTETE	RV18	DESTETERV18	1947	834	683	6184	1693	1153	898	55236	17638	1132	1006	1517	2378	1259	1069	1512	12540	3804	51696	6484	11003	7063	3839	18095	33130	5436	14747	1506	1701	5833	3284	824	4501	6499	2634	817	964	899	1605	1177	1138	2108	1597
22	Plasma_022_pos_055	22	139	DESTETE	RV18	DESTETERV18	1840	2006	729	3288	428	1790	1085	34701	12505	1094	1722	1478	1748	957	1091	2194	27301	4719	49246	16487	12601	2820	4600	29942	33819	5634	13093	3973	3346	3243	4882	1419	4170	8299	3622	1171	930	795	1446	1135	1197	2025	1760
23	Plasma_023_pos_056	23	66	PARTO	RV36	PARTORV36	2692	1313	798	6161	535	642	555	59535	7910	750	918	319	1821	560	1588	2485	16516	10661	55406	11798	6995	3855	2368	38883	28064	4733	16784	1231	2801	4931	2839	1323	7667	11271	5004	596	740	1029	1817	1201	852	2316	1229
24	Plasma_024_pos_057	24	72	PARTO	RV36	PARTORV36	2605	1026	620	4751	1855	1956	1601	63606	6179	1013	2299	443	402	2351	462	1363	15404	11764	60300	12265	7121	5181	2447	44357	30763	5171	19677	2111	3077	3397	3584	2308	9265	13653	2335	211	852	1217	1987	1255	941	2541	1294
25	Plasma_025_pos_058	25	140	PARTO	RV36	PARTORV36	2803	861	240	8369	938	269	1433	65436	8219	1547	1235	386	646	915	424	1460	33169	5868	61606	12070	6977	8365	1441	45712	18013	2261	20493	1402	1482	5569	3412	2432	9956	6998	4871	598	870	1269	2074	1345	898	2659	1326
26	Plasma_026_pos_060	26	76	PARTO	RV36	PARTORV36	2579	1798	341	4708	1772	1162	1085	58779	8387	750	1185	945	1367	1255	362	1634	17241	10725	53800	8174	7161	3832	2590	36571	28043	4596	15930	2201	1995	3080	2936	1266	7263	10407	3157	579	825	1004	1806	1180	908	2231	1239
27	Plasma_027_pos_061	27	68	PARTO	RV36	PARTORV36	2768	1896	291	3518	919	858	1429	60625	12648	693	433	2082	916	1928	716	2322	31440	11087	56221	11081	3427	7391	1162	39534	25962	2464	17479	684	1324	2749	2556	1274	7691	5790	3443	355	754	1158	1936	1205	889	2417	1176
28	Plasma_028_pos_062	28	148	PARTO	RV36	PARTORV36	2343	866	691	6742	448	919	2010	64495	15985	1194	1061	1149	2197	1811	2169	1971	18675	12016	61460	14594	10172	8317	3509	44582	37114	6141	12145	2018	3859	6815	4194	2146	9985	14136	1411	464	1006	1335	2096	1385	1148	2726	1646
29	Plasma_029_pos_063	29	84	PARTO	RV36	PARTORV36	2900	2024	406	11227	615	1306	1499	35606	17901	999	591	1555	310	1885	1300	1891	29321	10172	52970	15561	10837	6970	4000	34651	33626	3187	15094	1965	3408	3366	3198	2454	6827	7174	2811	425	883	933	1623	1148	1163	2083	1563
30	Plasma_030_pos_064	30	112	PARTO	RV36	PARTORV36	2571	1833	91	2192	1067	352	245	21975	6091	71	578	1579	585	1510	225	493	21734	3819	34717	7711	2823	4275	932	18685	12202	1777	7357	737	560	1066	570	53	1667	2646	715	27	403	618	1148	854	560	1465	806
31	Plasma_031_pos_071	31	114	PARTO	RV36	PARTORV36	2414	1225	909	7144	400	2607	2220	58310	18663	1248	385	1399	1823	1141	1377	1824	12966	4356	54533	16552	12528	4989	3134	36496	36993	6202	16094	3983	2802	4738	5662	1880	4169	10555	3094	355	931	1022	1744	1176	1201	2198	1674
32	Plasma_032_pos_072	32	118	PARTO	RV36	PARTORV36	1661	1869	742	5400	605	1278	1366	62395	8592	298	578	1235	943	772	1896	2861	31874	4767	58511	7660	5316	7874	1627	23052	31633	5221	12588	1520	905	5546	2972	1609	8833	12736	2989	393	851	1230	1954	1289	1020	2524	1391
33	Plasma_033_pos_073	33	120	PARTO	RV36	PARTORV36	2785	2002	368	7389	694	908	679	62652	7655	802	1559	341	477	767	1125	1494	31988	6067	57654	10163	5185	7663	1762	42595	25508	2255	18782	1611	1466	2953	4036	1168	8642	12649	5698	261	750	1137	1862	1229	706	2412	1049
34	Plasma_034_pos_074	34	122	PARTO	RV36	PARTORV36	1685	2497	936	14104	1178	838	2635	46516	22448	1380	260	1584	2942	453	1421	3027	12078	4416	18774	19133	15806	5626	2716	23646	33130	5638	9919	5208	1833	3851	4110	2223	4178	6008	1428	2203	741	529	1090	864	1132	1385	1694
35	Plasma_035_pos_075	35	66	DESTETE	RV36	DESTETERV36	1716	1419	624	2064	1669	1331	924	26638	18491	904	576	1206	1390	1049	571	1897	28162	5790	50851	6936	11944	6802	2146	32530	33915	5584	14211	3825	3459	4536	5004	1488	3851	9176	4142	787	934	833	1508	1096	1129	2016	1611
36	Plasma_036_pos_077	36	72	DESTETE	RV36	DESTETERV36	1920	1316	841	5356	962	825	2140	62094	8941	674	1097	1354	1692	727	911	1551	31721	5110	58136	8354	9327	7942	1794	41617	34097	5802	18563	1566	612	6013	5682	573	4562	12707	3981	364	975	1185	2075	1379	1135	2631	1706
37	Plasma_037_pos_078	37	140	DESTETE	RV36	DESTETERV36	2385	1130	1013	5155	883	653	940	62439	10531	814	1269	1744	1249	459	1009	844	15639	5308	28687	13739	9086	3655	2443	40924	33413	5556	18160	1638	2263	6075	3200	2633	8546	12404	3815	587	920	1134	1975	1295	1053	2548	1561
38	Plasma_038_pos_079	38	76	DESTETE	RV36	DESTETERV36	2004	1103	1273	10461	594	953	554	60064	16518	331	2048	1343	1273	1602	1577	1905	30691	10930	25896	9037	10309	7586	3737	38717	34645	5912	17190	3174	2061	6239	4152	2640	8025	11707	3383	228	1035	1075	1839	1198	1114	2352	1547
39	Plasma_039_pos_080	39	68	DESTETE	RV36	DESTETERV36	2493	2998	872	4809	1270	1740	1667	57783	7593	1321	327	1815	1315	1506	2007	2257	29582	10668	53943	15380	10937	7284	3946	36146	34771	5718	15998	3518	3544	4310	3482	2563	7327	10469	4616	756	910	934	1667	1118	1167	2166	1483
40	Plasma_040_pos_081	40	148	DESTETE	RV36	DESTETERV36	2181	928	881	4737	591	2112	1753	62970	7274	502	746	1381	1255	3546	704	1574	16887	7325	58943	5045	7554	4821	2691	42506	31172	5156	19007	2288	1830	3117	3296	2430	9035	12985	3926	286	978	1287	1984	1282	1047	2541	1372
41	Plasma_041_pos_083	41	84	DESTETE	RV36	DESTETERV36	720	1416	1124	7052	421	1342	3280	26716	17448	428	818	1458	1146	1728	725	2379	13596	4518	41945	14174	9225	5344	1753	24090	25816	2280	10175	1537	2349	3221	1802	1014	3078	6030	1308	825	678	637	1262	945	1003	1666	1464
42	Plasma_042_pos_084	42	112	DESTETE	RV36	DESTETERV36	2022	1484	281	5830	1533	1656	647	61015	14241	732	1552	630	534	1742	921	2778	31400	11131	56461	5735	7523	7523	1525	40413	30572	2986	18022	2460	2116	5407	4916	2336	5775	11908	3555	232	924	1152	1959	1265	968	2485	1376
43	Plasma_043_pos_085	43	114	DESTETE	RV36	DESTETERV36	2027	3494	891	4030	1418	1766	2243	53315	11226	1246	1230	744	1698	932	1970	2214	16951	2091	21649	17128	13436	4343	4994	30335	35312	5662	13118	4259	3552	6318	2730	2487	3125	8436	2645	376	971	790	1477	1077	1190	1933	1654
44	Plasma_044_pos_086	44	118	DESTETE	RV36	DESTETERV36	899	1648	1802	8882	746	1741	1561	23939	19778	1509	606	1945	1407	417	2156	2151	18094	6237	52247	17467	13975	3386	5211	33615	37627	3103	7497	4451	2322	3699	4294	1412	6717	5373	3145	1155	927	874	1564	1187	1225	2112	1876
45	Plasma_045_pos_087	45	120	DESTETE	RV36	DESTETERV36	2315	3028	509	9934	589	1361	1783	34665	8354	927	1360	625	1410	1596	1431	1566	30691	5424	55410	6012	8785	5340	3211	38730	32124	5419	17021	1474	3248	3326	5070	2422	7902	11545	3447	437	803	973	1743	1165	985	2170	1401
46	Plasma_046_pos_089	46	122	DESTETE	RV36	DESTETERV36	2429	1191	931	10165	1563	2354	2010	60244	16266	655	419	1372	1058	375	852	1951	17677	3779	56469	14187	5998	4132	3536	39389	34018	5600	17441	2119	3414	6035	2835	2562	7938	11712	3012	284	945	1093	1899	1282	1091	2497	1584
[truncated: 1,943 more columns]
