# Supplementary material for: Obesity-like metabolic signatures in females: from birth to weaning in a mammalian model
Source: Research Square preprint supplement (doi:10.21203/rs.3.rs-7381399/v1), 2026-02-10
Supplement: Supplementary file 2 [file b905e7a04940f830091e64a5.xlsx]

## Sheet: Area_1_2025_02_12_orig
																																		Class	1	1	1	1	1	1	1	1	1	1	1	1	1	1	1
																																		File type	Blank	Blank	Blank	Blank	Blank	Blank	Sample	Sample	Sample	Sample	Sample	Sample	Sample	Sample	Sample
																																		Injection order	1	2	3	4	5	6	7	8	9	10	11	12	13	14	15
																																		Batch ID	1	1	1	1	1	1	1	1	1	1	1	1	1	1	1
Alignment ID	Average Rt(min)	Average Mz	Metabolite name	Adduct type	Post curation result	Fill %	MS/MS assigned	Reference RT	Reference m/z	Formula	Ontology	INCHIKEY	SMILES	Annotation tag (VS1.0)	RT matched	m/z matched	MS/MS matched	Comment	Manually modified for quantification	Manually modified for annotation	Isotope tracking parent ID	Isotope tracking weight number	RT similarity	m/z similarity	Simple dot product	Weighted dot product	Reverse dot product	Matched peaks count	Matched peaks percentage	Total score	S/N average	Spectrum reference file name	MS1 isotopic spectrum	MS/MS spectrum	Blind_11_neg_054	Blind_16_neg_079	Blind_17_neg_084	Blind_4_neg_008	Blind_8_neg_031	Blind_9_neg_036	Plasma_001_neg_014	Plasma_002_neg_015	Plasma_003_neg_016	Plasma_004_neg_017	Plasma_005_neg_018	Plasma_006_neg_020	Plasma_007_neg_021	Plasma_008_neg_022	Plasma_009_neg_023
0	0.715	78.9198	Unknown	[M-H]-	null	0.1	False	null	null	null	null	null	null	999	False	False	False	Normalized unit: Intensity	False	False	0	0	0	null	null	null	null	null	null	null	907.65	Plasma_023_neg_045	78.91980:1099 79.92447:0 80.92914:0	null	0	0	0	0	0	0	1099	1061	1717	1326	1513	1523	707	1059	780
1	0.716	80.9178	Unknown	[M-H]-	null	0.24	False	null	null	null	null	null	null	999	False	False	False	Normalized unit: Intensity	False	False	1	0	0	null	null	null	null	null	null	null	909.71	Plasma_023_neg_045	80.91780:1131 81.92247:0 82.92714:0	null	0	0	0	0	0	0	1839	1989	1874	1198	444	1589	1172	384	1650
2	1.12	89.0263	no MS2: (S)-LACTATE	[M-H]-	null	0.46	False	8.183	89.0244	C3H6O3	Alpha hydroxy acids and derivatives	JVTAAEKCZFNVCJ-REOHCLBHSA-N	C[C@@H](C(=O)O)O	530	False	True	False	Normalized unit: Intensity; Annotation method: MSMS-Public_all-neg-VS19_1	False	False	2	0	0	1	-1	-1	-1	-1	-1	1	6057.35	QC_1-1_neg_009	89.02460:7268 90.02926:327 91.03393:0	null	40	55	22	157	124	78	22865	14912	21812	29825	15237	4748	12574	20894	16313
3	0.668	92.9283	Unknown	[M-H]-	null	0.91	False	null	null	null	null	null	null	999	False	False	False	Normalized unit: Intensity	False	False	3	0	0	null	null	null	null	null	null	null	2994.87	Plasma_006_neg_020	92.92830:3368 93.93297:0 94.93763:0	null	0	0	0	0	0	0	6171	6134	6082	6027	6155	6273	5908	5951	5762
4	0.668	94.927	Unknown	[M-H]-	null	0.91	False	null	null	null	null	null	null	999	False	False	False	Normalized unit: Intensity	False	False	4	0	0	null	null	null	null	null	null	null	2087.94	Plasma_041_neg_072	94.92700:2227 95.93167:0 96.93634:0	null	0	0	0	0	0	0	4229	4263	4162	4135	4188	4252	4094	4058	4019
5	0.803	96.9602	no MS2: Phosphoric acid	[M-H]-	null	0.54	False	9.626	96.9696	H3O4P	Non-metal phosphates	NBIIXXVUZAFLBC-UHFFFAOYSA-N	O=P(O)(O)O	530	False	True	False	Normalized unit: Intensity; Annotation method: MSMS-Public_all-neg-VS19_1	False	False	5	0	0	0.75	-1	-1	-1	-1	-1	0.75	40.61	Plasma_045_neg_076	96.96210:3641 97.96676:0 98.97143:0	null	0	0	0	0	0	0	20655	21190	24134	6564	23045	4899	8735	20579	3189
6	0.639	102.958	Unknown	[M-H]-	null	0.91	False	null	null	null	null	null	null	999	False	False	False	Normalized unit: Intensity	False	False	6	0	0	null	null	null	null	null	null	null	1587.02	Plasma_030_neg_053	102.95840:1790 103.96306:0 104.96773:0	null	0	0	0	0	0	0	2451	2464	2386	2492	2350	2484	2471	2576	2393
7	2.107	103.041	no MS2: 2-HYDROXYBUTYRIC ACID	[M-H]-	null	0.01	False	5.305	103.04	C4H8O3	Alpha hydroxy acids and derivatives	AFENDNXGAFYKQO-VKHMYHEASA-N	CC[C@@H](C(=O)O)O	530	False	True	False	Normalized unit: Intensity; Annotation method: MSMS-Public_all-neg-VS19_1	False	False	7	0	0	1	-1	-1	-1	-1	-1	1	855.38	Plasma_001_neg_014	103.04100:946 104.04567:0 105.05034:0	null	0	0	0	0	0	0	3790	569	519	727	1652	0	173	638	448
8	1.308	111.009	no MS2: Citraconic acid	[M-H2O-H]-	null	0.19	False	2.952	111.009	C5H6O4	Methyl-branched fatty acids	HNEGQIOMVPPMNR-IHWYPQMZSA-N	C/C(=C/C(=O)O)/C(=O)O	530	False	True	False	Normalized unit: Intensity; Annotation method: MSMS-Public_all-neg-VS19_1	False	False	8	0	0	1	-1	-1	-1	-1	-1	1	1750.24	QC_1-1_neg_009	111.00880:1947 112.01346:0 113.01813:0	null	0	0	0	0	0	0	12163	8973	14445	2649	1567	1923	3894	1142	481
9	0.618	112.986	no MS2: Acetylenedicarboxylic acid	[M-H]-	null	1	False	7.691	112.988	C4H2O4	Dicarboxylic acids and derivatives	YTIVTFGABIZHHX-UHFFFAOYSA-N	O=C(O)C#CC(=O)O	530	False	True	False	Normalized unit: Intensity; Annotation method: MSMS-Public_all-neg-VS19_1	False	False	9	0	0	1	-1	-1	-1	-1	-1	1	119.6	Plasma_035_neg_064	112.98800:5690 113.99267:0 114.99733:0	null	2740	2658	2634	1665	2837	2858	14825	14601	14757	16079	15731	15283	15392	15319	15388
10	1.045	116.036	no MS2: N-ACETYLGLYCINE	[M-H]-	null	0.01	False	5.4	116.035	C4H7NO3	N-acyl-alpha amino acids	OKJIRPAQVSHGFK-UHFFFAOYSA-N	CC(=O)NCC(=O)O	530	False	True	False	Normalized unit: Intensity; Annotation method: MSMS-Public_all-neg-VS19_1	False	False	10	0	0	1	-1	-1	-1	-1	-1	1	27.02	Plasma_005_neg_018	116.03580:962 117.04046:0 118.04513:0	null	0	0	0	0	0	0	17	126	0	211	1647	0	152	405	230
11	3.669	117.056	no MS2: beta-Hydroxyisovaleric acid	[M-H]-	null	0.04	False	1.55	117.056	C5H10O3	Hydroxy fatty acids	AXFYFNCPONWUHW-UHFFFAOYSA-N	O=C(O)CC(O)(C)C	530	False	True	False	Normalized unit: Intensity; Annotation method: MSMS-Public_all-neg-VS19_1	False	False	11	0	0	1	-1	-1	-1	-1	-1	1	69.55	Plasma_005_neg_018	117.05630:6136 118.06097:412 119.06563:0	null	0	0	0	0	0	0	754	658	862	957	14045	614	861	763	1030
12	4.632	121.03	no MS2: 4-HYDROXYBENZALDEHYDE	[M-H]-	null	0.01	False	2.528	121.029	C7H6O2	Hydroxybenzaldehydes	RGHHSNMVTDWUBI-UHFFFAOYSA-N	C1=CC(=CC=C1C=O)O	530	False	True	False	Normalized unit: Intensity; Annotation method: MSMS-Public_all-neg-VS19_1	False	False	12	0	0	1	-1	-1	-1	-1	-1	1	1129.63	Plasma_008_neg_022	121.03010:1128 122.03477:0 123.03943:0	null	0	0	0	0	0	0	20	0	0	0	57	0	265	2692	44
13	5.507	125.098	Unknown	[M-H]-	null	0.01	False	null	null	null	null	null	null	999	False	False	False	Normalized unit: Intensity	False	False	13	0	0	null	null	null	null	null	null	null	966.94	Plasma_008_neg_022	125.09800:1025 126.10267:0 127.10734:0	null	0	0	0	0	0	0	0	0	0	0	78	14	258	2298	129
14	0.955	126.022	no MS2: Azole-TP 1,2,4 triazole acetic acid	[M-H]-	null	0.07	False	0.929	126.031	C4H5N3O2	Alpha amino acids and derivatives	RXDBSQXFIWBJSR-UHFFFAOYSA-N	OC(=O)CN1C=NC=N1	530	False	True	False	Normalized unit: Intensity; Annotation method: MSMS-Public_all-neg-VS19_1	False	False	14	0	0	0.68	-1	-1	-1	-1	-1	0.68	969.65	Plasma_036_neg_066	126.02220:1399 127.02687:0 128.03154:0	null	0	0	0	0	0	0	348	199	39	334	547	241	877	1444	1308
15	1.442	128.036	no MS2: 5-OXO-L-PROLINE	[M-H]-	null	0.85	False	5.542	128.035	C5H7NO3	Alpha amino acids and derivatives	ODHCTXKNWHHXJC-VKHMYHEASA-N	C1CC(=O)N[C@@H]1C(=O)O	530	False	True	False	Normalized unit: Intensity; Annotation method: MSMS-Public_all-neg-VS19_1	False	False	15	0	0	1	-1	-1	-1	-1	-1	1	5895.75	QC_1-1_neg_009	128.03540:7841 129.04007:420 130.04474:0	null	0	0	0	0	0	0	45275	39892	24303	31091	7116	14315	27904	34835	17136
16	4.344	129.058	no MS2: Ketoleucine	[M-H]-	null	0.16	False	1.697	129.056	C6H10O3	Short-chain keto acids and derivatives	BKAJNAXTPSGJCU-UHFFFAOYSA-N	CC(C)CC(=O)C(=O)O	530	False	True	False	Normalized unit: Intensity; Annotation method: MSMS-Public_all-neg-VS19_1	False	False	16	0	0	1	-1	-1	-1	-1	-1	1	963.96	Plasma_005_neg_018	129.05611:1371 130.06077:0 131.06544:0	null	0	0	0	0	0	0	1432	927	16	749	4394	793	17	63	66
17	3.138	131.036	no MS2: ETHYLMALONIC ACID	[M-H]-	null	0.01	False	8.106	131.035	C5H8O4	Branched fatty acids	UKFXDFUAPNAMPJ-UHFFFAOYSA-N	CCC(C(=O)O)C(=O)O	530	False	True	False	Normalized unit: Intensity; Annotation method: MSMS-Public_all-neg-VS19_1	False	False	17	0	0	1	-1	-1	-1	-1	-1	1	1073	Plasma_008_neg_022	131.03580:1158 132.04046:0 133.04513:0	null	0	0	0	0	0	0	29	18	34	0	165	0	587	2198	392
18	0.942	133.017	no MS2: (S)-MALATE	[M-H]-	null	0.81	False	8.511	133.014	C4H6O5	Beta hydroxy acids and derivatives	BJEPYKJPYRNKOW-REOHCLBHSA-N	C([C@@H](C(=O)O)O)C(=O)O	530	False	True	False	Normalized unit: Intensity; Annotation method: MSMS-Public_all-neg-VS19_1	False	False	18	0	0	1	-1	-1	-1	-1	-1	1	35.77	QC_2-1_neg_010	133.01421:1775 134.01887:0 135.02354:0	null	0	0	0	0	0	0	7396	4705	2766	4508	1395	636	4523	5139	3233
19	0.735	135.032	no MS2: HYPOXANTHINE	[M-H]-	null	0.03	False	2.449	135.031	C5H4N4O	Hypoxanthines	FDGQSTZJBFJUBT-UHFFFAOYSA-N	C1=NC2=C(N1)C(=O)N=CN2	530	False	True	False	Normalized unit: Intensity; Annotation method: MSMS-Public_all-neg-VS19_1	False	False	19	0	0	1	-1	-1	-1	-1	-1	1	885.41	Plasma_030_neg_053	135.03169:901 136.03636:0 137.04103:0	null	0	0	0	0	0	0	1941	1768	774	1433	1709	1247	699	1821	467
20	5.785	137.026	no MS2: 4-HYDROXYBENZOATE	[M-H]-	null	0.01	False	7.346	137.024	C7H6O3	Hydroxybenzoic acid derivatives	FJKROLUGYXJWQN-UHFFFAOYSA-N	C1=CC(=CC=C1C(=O)O)O	530	False	True	False	Normalized unit: Intensity; Annotation method: MSMS-Public_all-neg-VS19_1	False	False	20	0	0	0.98	-1	-1	-1	-1	-1	0.98	904.25	Plasma_025_neg_047	137.02631:944 138.03097:0 139.03564:0	null	0	0	0	0	0	0	144	39	212	768	0	1003	587	408	18
21	0.956	144.033	Unknown	[M-H]-	null	0.26	False	null	null	null	null	null	null	999	False	False	False	Normalized unit: Intensity	False	False	21	0	0	null	null	null	null	null	null	null	1553.01	Plasma_036_neg_066	144.03281:3456 145.03747:0 146.04214:0	null	0	0	0	0	0	0	1699	894	155	490	1190	1247	1954	3126	3018
22	1.042	144.078	no MS2: 4-Guanidinobutyric acid	[M-H]-	null	0.13	False	7.312	144.078	C5H11N3O2	Gamma amino acids and derivatives	TUHVEAJXIMEOSA-UHFFFAOYSA-N	O=C(O)CCCNC(=N)N	530	False	True	False	Normalized unit: Intensity; Annotation method: MSMS-Public_all-neg-VS19_1	False	False	22	0	0	1	-1	-1	-1	-1	-1	1	1138.98	Plasma_008_neg_022	144.07840:1808 145.08307:0 146.08774:204	null	0	0	0	0	0	0	989	548	370	0	0	709	697	3143	1660
23	3.643	145.051	no MS2: 5-Phenyl-1H-tetrazole	[M-H]-	null	0.01	False	13.231	145.052	C7H6N4	Phenyltetrazoles and derivatives	MARUHZGHZWCEQU-UHFFFAOYSA-N	N1N=NN=C1C1=CC=CC=C1	530	False	True	False	Normalized unit: Intensity; Annotation method: MSMS-Public_all-neg-VS19_1	False	False	23	0	0	1	-1	-1	-1	-1	-1	1	19.2	Plasma_008_neg_022	145.05141:810 146.05607:0 147.06074:0	null	0	0	0	0	0	0	154	23	201	217	34	19	192	1591	57
24	3.005	145.053	no MS2: 5-Phenyl-1H-tetrazole	[M-H]-	null	0.01	False	13.231	145.052	C7H6N4	Phenyltetrazoles and derivatives	MARUHZGHZWCEQU-UHFFFAOYSA-N	N1N=NN=C1C1=CC=CC=C1	530	False	True	False	Normalized unit: Intensity; Annotation method: MSMS-Public_all-neg-VS19_1	False	False	24	0	0	0.99	-1	-1	-1	-1	-1	0.99	38.35	Plasma_030_neg_053	145.05321:1582 146.05788:0 147.06254:0	null	0	0	0	0	0	0	729	17	418	850	1109	0	0	11	0
25	0.685	145.063	no MS2: L-GLUTAMINE	[M-H]-	null	0.9	False	6.045	145.062	C5H10N2O3	Alpha amino acids	ZDXPYRJPNDTMRX-VKHMYHEASA-N	C(CC(=O)N)[C@@H](C(=O)O)N	530	False	True	False	Normalized unit: Intensity; Annotation method: MSMS-Public_all-neg-VS19_1	False	False	25	0	0	1	-1	-1	-1	-1	-1	1	43.9	QC_2-1_neg_010	145.06190:1985 146.06657:147 147.07124:0	null	0	0	0	0	0	0	2825	2640	3127	1683	1917	1721	5051	2848	6107
26	1.522	145.063	no MS2: L-GLUTAMINE	[M-H]-	null	0.03	False	6.045	145.062	C5H10N2O3	Alpha amino acids	ZDXPYRJPNDTMRX-VKHMYHEASA-N	C(CC(=O)N)[C@@H](C(=O)O)N	530	False	True	False	Normalized unit: Intensity; Annotation method: MSMS-Public_all-neg-VS19_1	False	False	26	0	0	0.99	-1	-1	-1	-1	-1	0.99	471.27	Plasma_017_neg_038	145.06320:1230 146.06787:0 147.07254:0	null	0	0	0	0	0	0	69	37	0	0	30	129	159	1659	317
27	5.686	145.087	no MS2: Unknown (carbon number 7); PlaSMA ID-87	[M-H]-	null	0.03	False	5.06	145.086	C7H14O3	Unknown	null	null	530	False	True	False	Normalized unit: Intensity; Annotation method: MSMS-Public_all-neg-VS19_1	False	False	27	0	0	0.99	-1	-1	-1	-1	-1	0.9	547.39	Plasma_008_neg_022	145.08740:2821 146.09207:241 147.09674:0	null	0	0	0	0	0	0	57	138	157	21	0	0	730	6453	939
28	0.71	146.048	no MS2: N-ACETYL-DL-SERINE	[M-H]-	null	0.91	False	5.642	146.046	C5H9NO4	N-acyl-L-alpha-amino acids	JJIHLJJYMXLCOY-UHFFFAOYSA-N	CC(=O)NC(CO)C(=O)O	530	False	True	False	Normalized unit: Intensity; Annotation method: MSMS-Public_all-neg-VS19_1	False	False	28	0	0	1	-1	-1	-1	-1	-1	1	155.86	QC_4-1_neg_012	146.04601:1415 147.05067:0 148.05534:0	null	0	0	0	0	0	0	4072	3078	3361	3612	2040	2176	3515	2766	3293
29	5.518	151.043	no MS2: RESORCINOL MONOACETATE	[M-H]-	null	0.01	False	0.965	151.04	C8H8O3	Phenol esters	ZZPKZRHERLGEKA-UHFFFAOYSA-N	CC(=O)OC1=CC=CC(=C1)O	530	False	True	False	Normalized unit: Intensity; Annotation method: MSMS-Public_all-neg-VS19_1	False	False	29	0	0	0.96	-1	-1	-1	-1	-1	0.96	801.94	Plasma_041_neg_072	151.04280:861 152.04747:0 153.05214:0	null	0	0	0	0	0	0	27	695	0	0	0	0	294	271	0
30	4.471	153.021	no MS2: 2,5-Dihydroxybenzoic acid	[M-H]-	null	0.43	False	4.887	153.019	C7H6O4	Hydroxybenzoic acid derivatives	WXTMDXOMEHJXQO-UHFFFAOYSA-N	C1=CC(=C(C=C1O)C(=O)O)O	530	False	True	False	Normalized unit: Intensity; Annotation method: MSMS-Public_all-neg-VS19_1	False	False	30	0	0	1	-1	-1	-1	-1	-1	1	1205.38	QC_1-1_neg_009	153.01920:1171 154.02386:0 155.02853:0	null	0	0	0	0	0	0	413	138	167	1042	0	5004	1966	2906	0
31	0.925	155.004	no MS2: 2,4-DIHYDROXYPYRIMIDINE-5-CARBOXYLIC ACID	[M-H]-	null	0.01	False	7.637	155.01	C5H4N2O4	Pyrimidinecarboxylic acids	ZXYAAVBXHKCJJB-UHFFFAOYSA-N	C1=C(C(=O)NC(=O)N1)C(=O)O	530	False	True	False	Normalized unit: Intensity; Annotation method: MSMS-Public_all-neg-VS19_1	False	False	31	0	0	0.86	-1	-1	-1	-1	-1	0.86	2350	Plasma_030_neg_053	155.00430:2352 156.00897:0 157.01364:0	null	0	0	0	0	0	0	0	0	0	0	0	0	0	0	0
32	0.712	155.047	no MS2: 5,5-Dimethylbarbituric acid	[M-H]-	null	0.03	False	17.343	155.046	C6H8N2O3	Barbituric acid derivatives	LAOZSCRCYVBSJA-UHFFFAOYSA-N	CC1(C)C(=O)NC(=O)NC1=O	530	False	True	False	Normalized unit: Intensity; Annotation method: MSMS-Public_all-neg-VS19_1	False	False	32	0	0	1	-1	-1	-1	-1	-1	1	1085.97	Plasma_005_neg_018	155.04660:1244 156.05127:0 157.05594:0	null	0	0	0	0	0	0	440	149	207	42	2148	445	474	0	382
33	0.746	157.04	no MS2: ALLANTOIN	[M-H]-	null	0.82	False	2.311	157.037	C4H6N4O3	Imidazoles	POJWUDADGALRAB-UHFFFAOYSA-N	C1(C(=O)NC(=O)N1)NC(=O)N	530	False	True	False	Normalized unit: Intensity; Annotation method: MSMS-Public_all-neg-VS19_1	False	False	33	0	0	1	-1	-1	-1	-1	-1	1	1628.47	QC_2-1_neg_010	157.03670:1686 158.04137:0 159.04603:0	null	0	0	0	0	0	0	2129	1646	2378	1333	2078	2858	1388	2207	1385
34	0.581	158.981	Unknown	[M-H]-	null	0.03	False	null	null	null	null	null	null	999	False	False	False	Normalized unit: Intensity	False	False	34	0	0	null	null	null	null	null	null	null	1159.97	QC_1-3_neg_055	158.98129:1247 159.98596:0 160.99063:0	null	30	21	0	55	0	0	1608	1896	2375	1973	1088	2685	1510	1079	1675
35	4.188	159.067	no MS2: 6-CARBOXYHEXANOATE	[M-H]-	null	0.01	False	1.704	159.066	C7H12O4	Medium-chain fatty acids	WLJVNTCWHIRURA-UHFFFAOYSA-N	C(CCC(=O)O)CCC(=O)O	530	False	True	False	Normalized unit: Intensity; Annotation method: MSMS-Public_all-neg-VS19_1	False	False	35	0	0	0.99	-1	-1	-1	-1	-1	0.99	1015.69	Plasma_008_neg_022	159.06750:1052 160.07217:0 161.07684:0	null	0	0	0	0	0	0	119	58	63	26	0	412	318	2092	147
36	0.674	160.844	Unknown	[M-H]-	null	0.91	False	null	null	null	null	null	null	999	False	False	False	Normalized unit: Intensity	False	False	36	0	0	null	null	null	null	null	null	null	48.49	Plasma_017_neg_038	160.84399:2655 161.84866:0 162.85333:0	null	471	251	358	692	488	495	1858	1923	2032	1901	2073	2266	1849	1720	2029
37	0.674	162.841	Unknown	[M-H]-	null	0.91	False	null	null	null	null	null	null	999	False	False	False	Normalized unit: Intensity	False	False	37	0	0	null	null	null	null	null	null	null	47.89	Plasma_017_neg_038	162.84090:2619 163.84556:0 164.85023:0	null	425	428	23	601	414	415	1619	2016	2133	1840	1981	2159	1964	1635	2036
38	0.715	165.041	no MS2: 3-Methylxanthine	[M-H]-	null	0.91	False	-1	165.042	C6H6N4O2	Xanthines	GMSNIKWWOQHZGF-UHFFFAOYSA-N	CN1C2=C(C(=O)NC1=O)NC=N2	530	False	True	False	Normalized unit: Intensity; Annotation method: MSMS-Public_all-neg-VS19_1	False	False	38	0	0	1	-1	-1	-1	-1	-1	1	3089.37	QC_2-2_neg_033	165.04170:3446 166.04637:198 167.05104:0	null	0	0	0	0	0	0	6904	6494	5442	6710	2393	5416	7943	17250	5835
39	5.007	165.056	no MS2: Caffeyl alcohol; PlaSMA ID-148	[M-H]-	null	0.01	False	3.18	165.056	C9H10O3	Cinnamic acid and derivatives	ZCKDCRKBURQZPT-UHFFFAOYSA-N	OCC=CC1=CC=C(O)C(O)=C1	530	False	True	False	Normalized unit: Intensity; Annotation method: MSMS-Public_all-neg-VS19_1	False	False	39	0	0	1	-1	-1	-1	-1	-1	1	2582.69	Plasma_007_neg_021	165.05620:2521 166.06087:279 167.06553:0	null	0	0	0	0	0	0	0	0	0	0	0	65	5799	0	0
40	0.88	166.021	no MS2: 6-Thioguanine	[M-H]-	null	0.01	False	3.049	166.019	C5H5N5S	Purinethiones	WYWHKKSPHMUBEB-UHFFFAOYSA-N	NC1=NC2=C(NC=N2)C(=S)N1	530	False	True	False	Normalized unit: Intensity; Annotation method: MSMS-Public_all-neg-VS19_1	False	False	40	0	0	0.99	-1	-1	-1	-1	-1	0.99	1002.13	Plasma_030_neg_053	166.02071:926 167.02537:0 168.03004:0	null	0	0	0	0	0	0	337	147	429	224	499	857	166	269	18
41	1.247	167.022	no MS2: URATE	[M-H]-	null	0.21	False	7.408	167.021	C5H4N4O3	Xanthines	LEHOTFFKMJEONL-UHFFFAOYSA-N	C12=C(NC(=O)N1)NC(=O)NC2=O	530	False	True	False	Normalized unit: Intensity; Annotation method: MSMS-Public_all-neg-VS19_1	False	False	41	0	0	1	-1	-1	-1	-1	-1	1	981.08	QC_1-1_neg_009	167.02100:1011 168.02566:0 169.03033:0	null	0	0	0	0	0	0	1719	1161	2539	787	1238	619	13	0	0
42	3.984	172.1	no MS2: N-Acetylleucine	[M-H]-	null	0.09	False	2.779	172.098	C8H15NO3	Leucine and derivatives	WXNXCEHXYPACJF-UHFFFAOYSA-N	CC(C)CC(C(=O)O)NC(=O)C	530	False	True	False	Normalized unit: Intensity; Annotation method: MSMS-Public_all-neg-VS19_1	False	False	42	0	0	1	-1	-1	-1	-1	-1	1	1043.31	Plasma_005_neg_018	172.09869:1138 173.10336:0 174.10803:0	null	0	0	0	0	0	0	0	0	0	0	2006	255	1592	1461	701
43	4.837	173.083	no MS2: SUBERIC ACID	[M-H]-	null	0.21	False	1.686	173.082	C8H14O4	Medium-chain fatty acids	TYFQFVWCELRYAO-UHFFFAOYSA-N	C(CCCC(=O)O)CCC(=O)O	530	False	True	False	Normalized unit: Intensity; Annotation method: MSMS-Public_all-neg-VS19_1	False	False	43	0	0	1	-1	-1	-1	-1	-1	1	86.05	Plasma_008_neg_022	173.08270:3017 174.08737:242 175.09204:0	null	14	15	0	184	16	19	472	534	231	487	1857	812	2591	6478	1292
44	0.71	174.091	no MS2: Citrulline	[M-H]-	null	0.24	False	10.599	174.088	C6H13N3O3	L-alpha-amino acids	RHGKLRLOHDJJDR-UHFFFAOYSA-N	C(CC(C(=O)O)N)CNC(=O)N	530	False	True	False	Normalized unit: Intensity; Annotation method: MSMS-Public_all-neg-VS19_1	False	False	44	0	0	1	-1	-1	-1	-1	-1	1	1007.21	Plasma_001_neg_014	174.08859:1101 175.09326:0 176.09793:0	null	0	0	0	0	0	0	1976	2100	1780	1427	1665	1934	2082	1006	1121
45	0.566	174.96	Unknown	[M-H]-	null	0.12	False	null	null	null	null	null	null	999	False	False	False	Normalized unit: Intensity	False	False	45	0	0	null	null	null	null	null	null	null	3003.22	Plasma_037_neg_067	174.96010:3786 175.96477:0 176.96943:0	null	1875	1821	1821	2386	1813	1089	2331	2959	3046	9251	9206	2633	5215	4264	3513
46	4.269	178.053	no MS2: HIPPURATE	[M-H]-	null	0.9	False	4.805	178.051	C9H9NO3	Hippuric acids	QIAFMBKCNZACKA-UHFFFAOYSA-N	C1=CC=C(C=C1)C(=O)NCC(=O)O	530	False	True	False	Normalized unit: Intensity; Annotation method: MSMS-Public_all-neg-VS19_1	False	False	46	0	0	1	-1	-1	-1	-1	-1	1	6319.91	QC_3-1_neg_011	178.05099:6975 179.05566:777 180.06033:0	null	0	0	0	0	0	0	13880	13255	13265	25318	784	18351	5021	14602	1910
47	0.726	179.056	no MS2: Theophylline	[M-H]-	null	0.65	False	2.169	179.057	C7H8N4O2	Xanthines	ZFXYFBGIUFBOJW-UHFFFAOYSA-N	CN1C2=C(NC=N2)C(=O)N(C)C1=O	530	False	True	False	Normalized unit: Intensity; Annotation method: MSMS-Public_all-neg-VS19_1	False	False	47	0	0	1	-1	-1	-1	-1	-1	1	2020.75	Plasma_019_neg_040	179.05740:1819 180.06207:0 181.06674:0	null	0	0	0	0	0	0	11167	4216	4485	959	4831	8173	2764	5738	4193
48	0.619	180.974	Unknown	[M-H]-	null	0.91	False	null	null	null	null	null	null	999	False	False	False	Normalized unit: Intensity	False	False	48	0	0	null	null	null	null	null	null	null	2238.41	Plasma_004_neg_017	180.97360:2469 181.97827:0 182.98294:0	null	659	666	601	857	655	385	5287	5193	5121	5781	5675	5450	5611	5549	5475
49	4.002	181.006	Unknown	[M-H]-	null	0.91	False	null	null	null	null	null	null	999	False	False	False	Normalized unit: Intensity	False	False	49	0	0	null	null	null	null	null	null	null	1796.46	Plasma_001_neg_014	181.00650:2184 182.01117:218 183.01584:0	null	0	0	0	0	0	0	4707	4541	4436	4292	4289	4370	4339	4085	4297
50	3	182.048	no MS2: 4-PYRIDOXATE	[M-H]-	null	0.01	False	4.499	182.046	C8H9NO4	Pyridinecarboxylic acids	HXACOUQIXZGNBF-UHFFFAOYSA-N	CC1=NC=C(C(=C1O)C(=O)O)CO	530	False	True	False	Normalized unit: Intensity; Annotation method: MSMS-Public_all-neg-VS19_1	False	False	50	0	0	0.98	-1	-1	-1	-1	-1	0.98	893.5	Plasma_017_neg_038	182.04770:908 183.05237:0 184.05703:0	null	0	0	0	0	0	0	265	402	64	37	0	871	89	447	0
51	6.433	185.083	no MS2: 2-(1-hydroxyethyl)-4-(2-hydroxypropyl)-2H-furan-5-one	[M-H]-	null	0.01	False	1.699	185.082	C9H14O4	Butenolides	JAAFNWYGLROOGI-UHFFFAOYSA-N	O=C1OC(C=C1CC(O)C)C(O)C	530	False	True	False	Normalized unit: Intensity; Annotation method: MSMS-Public_all-neg-VS19_1	False	False	51	0	0	1	-1	-1	-1	-1	-1	1	932.75	Plasma_008_neg_022	185.08260:939 186.08726:0 187.09193:0	null	0	0	0	0	0	0	0	0	0	0	0	0	0	2479	0
52	4.568	186.115	no MS2: 3-(2-amino-2-oxoethyl)-5-methyl-hexanoic acid	[M-H]-	null	0.13	False	-1	186.114	C9H17NO3	Medium-chain fatty acids	NPDKTSLVWGFPQG-UHFFFAOYSA-N	NC(CC(CC(C)C)CC(O)=O)=O	530	False	True	False	Normalized unit: Intensity; Annotation method: MSMS-Public_all-neg-VS19_1	False	False	52	0	0	1	-1	-1	-1	-1	-1	1	1380.66	Plasma_008_neg_022	186.11411:2200 187.11877:246 188.12344:0	null	311	478	456	675	462	350	309	63	414	259	1192	504	2017	4701	815
53	4.718	187.01	no MS2: p-Cresol sulfate	[M-H]-	null	0.66	False	-1	187.007	C7H8O4S	Phenylsulfates	WGNAKZGUSRVWRH-UHFFFAOYSA-N	Cc(c1)ccc(c1)OS(O)(=O)=O	530	False	True	False	Normalized unit: Intensity; Annotation method: MSMS-Public_all-neg-VS19_1	False	False	53	0	0	1	-1	-1	-1	-1	-1	1	3686.24	QC_1-1_neg_009	187.00720:3319 188.01187:357 189.01654:0	null	0	0	0	0	0	0	490	574	660	1090	35496	2012	803	1310	37655
54	1.131	187.046	no MS2: 1-Hydroxy-2-naphthoic acid	[M-H]-	null	0.19	False	1.324	187.04	C11H8O3	Naphthalenecarboxylic acids	SJJCQDRGABAVBB-UHFFFAOYSA-N	O=C(O)C=1C=CC=2C=CC=CC2C1O	530	False	True	False	Normalized unit: Intensity; Annotation method: MSMS-Public_all-neg-VS19_1	False	False	54	0	0	0.98	-1	-1	-1	-1	-1	0.98	1195.9	QC_1-1_neg_009	187.04210:1174 188.04677:0 189.05143:0	null	0	0	0	0	0	0	1682	889	2534	2691	1576	610	222	571	1134
55	5.491	187.099	no MS2: Azelaic acid (Not validated); PlaSMA ID-221	[M-H]-	null	0.93	False	4.78	187.097	C9H16O4	Organic acids	BDJRBEYXGGNYIS-UHFFFAOYSA-N	O=C(O)CCCCCCCC(=O)O	530	False	True	False	Normalized unit: Intensity; Annotation method: MSMS-Public_all-neg-VS19_1	False	False	55	0	0	1	-1	-1	-1	-1	-1	1	3687.67	Blind_4_neg_008	187.09731:979 188.10197:0 189.10664:0	null	357	751	667	1934	757	712	5088	3465	3715	3607	12224	7022	14974	56527	10442
56	3.624	188.99	no MS2: 2,4-Dichloro-3,5-dimethylphenol	[M-H]-	null	0.18	False	18.769	188.988	C8H8Cl2O	Dichlorobenzenes	IYOLBFFHPZOQGW-UHFFFAOYSA-N	CC1=CC(O)=C(Cl)C(C)=C1Cl	530	False	True	False	Normalized unit: Intensity; Annotation method: MSMS-Public_all-neg-VS19_1	False	False	56	0	0	1	-1	-1	-1	-1	-1	1	1062.54	Plasma_011_neg_026	188.98770:839 189.99237:0 190.99704:0	null	0	0	0	0	0	0	661	366	911	941	38	2493	21	476	0
57	5.32	189.114	Unknown	[M-H]-	null	0.01	False	null	null	null	null	null	null	999	False	False	False	Normalized unit: Intensity	False	False	57	0	0	null	null	null	null	null	null	null	2533.25	Plasma_008_neg_022	189.11420:2537 190.11886:295 191.12353:0	null	0	0	0	0	0	0	299	60	237	0	17	0	1403	5876	1052
58	1.295	191.021	no MS2: CITRATE	[M-H]-	null	0.78	False	12.075	191.02	C6H8O7	Tricarboxylic acids and derivatives	KRKNYBCHXYNGOX-UHFFFAOYSA-N	C(C(=O)O)C(CC(=O)O)(C(=O)O)O	530	False	True	False	Normalized unit: Intensity; Annotation method: MSMS-Public_all-neg-VS19_1	False	False	58	0	0	1	-1	-1	-1	-1	-1	1	246.76	QC_1-1_neg_009	191.01990:13131 192.02457:1024 193.02923:245	null	0	0	0	0	0	0	95602	82015	103698	51439	42105	44211	44731	82435	42830
59	4.592	192.067	no MS2: Phenylacetylglycine	[M-H]-	null	0.66	False	2.78	192.067	C10H11NO3	N-acyl-alpha amino acids	UTYVDVLMYQPLQB-UHFFFAOYSA-N	O=C(O)CN=C(O)CC=1C=CC=CC1	530	False	True	False	Normalized unit: Intensity; Annotation method: MSMS-Public_all-neg-VS19_1	False	False	59	0	0	1	-1	-1	-1	-1	-1	1	1776.66	QC_2-1_neg_010	192.06680:1594 193.07147:226 194.07614:0	null	0	0	0	0	0	0	295	444	10544	67	2811	3278	21	13	2086
60	0.717	193.04	no MS2: Glucuronic acid	[M-H]-	null	0.01	False	8.752	193.035	C6H10O7	Glucuronic acid derivatives	IAJILQKETJEXLJ-QTBDOELSSA-N	O=CC(O)C(O)C(O)C(O)C(=O)O	530	False	True	False	Normalized unit: Intensity; Annotation method: MSMS-Public_all-neg-VS19_1	False	False	60	0	0	0.91	-1	-1	-1	-1	-1	0.91	1350.75	Plasma_043_neg_074	193.03970:1562 194.04437:0 195.04904:5401	null	0	0	0	0	0	0	370	202	671	164	600	287	652	431	991
61	7.763	193.087	no MS2: Butylparaben	[M-H]-	null	0.09	False	11.128	193.087	C11H14O3	p-Hydroxybenzoic acid alkyl esters	QFOHBWFCKVYLES-UHFFFAOYSA-N	CCCCOC(=O)c1ccc(O)cc1	530	False	True	False	Normalized unit: Intensity; Annotation method: MSMS-Public_all-neg-VS19_1	False	False	61	0	0	1	-1	-1	-1	-1	-1	1	28.89	Plasma_007_neg_021	193.08681:819 194.09148:0 195.09614:0	null	2085	2004	27	3478	2099	2093	1929	1020	1929	2019	1991	1926	1989	1845	1917
62	3.73	194.047	no MS2: N-Acetyl Mesalazine	[M-H]-	null	0.01	False	3.869	194.046	C9H9NO4	Acylaminobenzoic acid and derivatives	GEFDRROBUCULOD-UHFFFAOYSA-N	CC(=O)NC1=CC=C(O)C(=C1)C(O)=O	530	False	True	False	Normalized unit: Intensity; Annotation method: MSMS-Public_all-neg-VS19_1	False	False	62	0	0	0.99	-1	-1	-1	-1	-1	0.99	2332.06	Plasma_007_neg_021	194.04691:2517 195.05157:236 196.05624:0	null	0	0	0	0	0	0	127	60	0	93	0	312	4833	0	0
63	0.718	195.052	no MS2: 1,7-Dimethyluric acid	[M-H]-	null	0.91	False	4.206	195.052	C7H8N4O3	Xanthines	NOFNCLGCUJJPKU-UHFFFAOYSA-N	O=C1C2=C(N=C(O)N1C)N=C(O)N2C	530	False	True	False	Normalized unit: Intensity; Annotation method: MSMS-Public_all-neg-VS19_1	False	False	63	0	0	1	-1	-1	-1	-1	-1	1	4106.26	Plasma_014_neg_029	195.05240:3362 196.05707:274 197.06173:0	null	0	0	0	0	0	0	12491	8436	8775	8912	9181	7463	15131	9922	11258
64	0.733	195.813	Unknown	[M-H]-	null	0.99	False	null	null	null	null	null	null	999	False	False	False	Normalized unit: Intensity	False	False	64	0	0	null	null	null	null	null	null	null	3926.88	Plasma_017_neg_038	195.81300:4882 196.81767:0 197.82234:0	null	6586	6408	6444	5652	6612	6901	12396	13420	14105	13593	14874	16170	13160	12725	13571
65	5.22	197.085	no MS2: IQ	[M-H]-	null	0.01	False	-1	197.083	C11H10N4	Quinolines and derivatives	ARZWATDYIYAUTA-UHFFFAOYSA-N	Cn1c2c(c3c(cc2)nccc3)nc1N	530	False	True	False	Normalized unit: Intensity; Annotation method: MSMS-Public_all-neg-VS19_1	False	False	65	0	0	0.99	-1	-1	-1	-1	-1	0.99	952	Plasma_030_neg_053	197.08479:1084 198.08946:0 199.09413:0	null	0	0	0	0	0	0	0	0	0	0	178	0	0	0	0
66	0.738	197.81	Unknown	[M-H]-	null	0.91	False	null	null	null	null	null	null	999	False	False	False	Normalized unit: Intensity	False	False	66	0	0	null	null	null	null	null	null	null	4319.32	Plasma_017_neg_038	197.81030:6332 198.81497:0 199.81964:0	null	8203	7941	8011	7119	8267	8702	15684	17383	18245	17543	18628	20930	16930	12758	17710
67	0.681	197.81	Unknown	[M-H]-	null	0.94	False	null	null	null	null	null	null	999	False	False	False	Normalized unit: Intensity	False	False	67	0	0	null	null	null	null	null	null	null	2903.61	Blind_9_neg_036	197.81050:4764 198.81517:0 199.81984:0	null	8203	7941	8011	7119	8267	8702	2724	3593	3967	3517	3846	4550	3509	3549	3735
68	4.002	198.033	no MS2: Clavulanic acid	[M-H]-	null	0.91	False	-1	198.041	C8H9NO5	Alpha amino acids and derivatives	HZZVJAQRINQKSD-PBFISZAISA-N	C1[C@@H]2N(C1=O)[C@H](/C(=C/CO)/O2)C(=O)O	530	False	True	False	Normalized unit: Intensity; Annotation method: MSMS-Public_all-neg-VS19_1	False	False	68	0	0	0.94	-1	-1	-1	-1	-1	0.94	34821.8	QC_4-4_neg_083	198.03740:35825 199.04207:3937 200.04673:0	null	0	0	0	0	0	0	92899	89429	88932	83884	86957	86675	83389	80608	84112
69	3.986	198.118	Unknown	[M-H]-	null	0.22	False	null	null	null	null	null	null	999	False	False	False	Normalized unit: Intensity	False	False	69	0	0	null	null	null	null	null	null	null	1344.58	QC_1-4_neg_080	198.11830:2299 199.12297:0 200.12764:424	null	0	0	0	0	0	0	202	597	519	292	328	143	115	194	151
70	0.733	199.806	Unknown	[M-H]-	null	0.97	False	null	null	null	null	null	null	999	False	False	False	Normalized unit: Intensity	False	False	70	0	0	null	null	null	null	null	null	null	2366.48	Plasma_006_neg_020	199.80560:3165 200.81027:0 201.81494:0	null	3946	3783	3814	3468	3945	4195	7938	5950	9033	8880	8964	10400	8453	4492	8731
71	4.002	200.031	no MS2: Thiabendazole	[M-H]-	null	0.91	False	-1	200.029	C10H7N3S	Benzimidazoles	WJCNZQLZVWNLKY-UHFFFAOYSA-N	C1=CC=C2C(=C1)NC(=N2)C3=CSC=N3	530	False	True	False	Normalized unit: Intensity; Annotation method: MSMS-Public_all-neg-VS19_1	False	False	71	0	0	0.99	-1	-1	-1	-1	-1	0.99	11709	QC_1-1_neg_009	200.03011:13069 201.03477:1224 202.03944:0	null	0	0	0	0	0	0	31028	29970	29958	28240	29121	29037	28000	26871	28207
72	5.531	201.027	no MS2: FT-thioether; C6H9F3O2S	[M-H]-	null	0.13	False	-1	201.02	C6H9F3O2S	Halogenated fatty acids	KGAUNOUXSXJJRZ-UHFFFAOYSA-N	O=C(O)CCSCCC(F)(F)F	530	False	True	False	Normalized unit: Intensity; Annotation method: MSMS-Public_all-neg-VS19_1	False	False	72	0	0	0.95	-1	-1	-1	-1	-1	0.95	1090.6	Plasma_008_neg_022	201.02341:1107 202.02807:0 203.03274:0	null	0	0	0	0	0	0	0	0	0	0	0	85	0	2365	0
73	3.676	203.084	no MS2: L-TRYPTOPHAN	[M-H]-	null	0.47	False	2.831	203.083	C11H12N2O2	Indolyl carboxylic acids and derivatives	QIVBCDIJIAJPQS-VIFPVBQESA-N	C1=CC=C2C(=C1)C(=CN2)C[C@@H](C(=O)O)N	530	False	True	False	Normalized unit: Intensity; Annotation method: MSMS-Public_all-neg-VS19_1	False	False	73	0	0	1	-1	-1	-1	-1	-1	1	1016.08	QC_2-1_neg_010	203.08250:820 204.08717:0 205.09184:0	null	0	0	0	0	0	0	1673	1075	1321	1079	400	1386	1336	1229	0
74	7.675	207.102	no MS2: Aminocarb	[M-H]-	null	0.04	False	14.528	207.114	C11H16N2O2	Phenoxy compounds	IMIDOCRTMDIQIJ-UHFFFAOYSA-N	CNC(=O)OC1=CC(C)=C(C=C1)N(C)C	530	False	True	False	Normalized unit: Intensity; Annotation method: MSMS-Public_all-neg-VS19_1	False	False	74	0	0	0.77	-1	-1	-1	-1	-1	0.77	989.88	Blind_17_neg_084	207.10660:1026 208.11127:0 209.11593:0	null	2194	2169	2181	2116	2163	2154	1034	2083	105	2225	1002	2266	773	1940	2230
75	0.667	208.847	Unknown	[M-H]-	null	0.91	False	null	null	null	null	null	null	999	False	False	False	Normalized unit: Intensity	False	False	75	0	0	null	null	null	null	null	null	null	1004.36	Plasma_017_neg_038	208.84700:1224 209.85167:0 210.85634:0	null	0	0	0	0	0	0	1590	1687	1617	1643	1663	1638	1601	1481	1475
76	0.667	210.844	Unknown	[M-H]-	null	0.91	False	null	null	null	null	null	null	999	False	False	False	Normalized unit: Intensity	False	False	76	0	0	null	null	null	null	null	null	null	1317.7	Plasma_017_neg_038	210.84419:1414 211.84886:0 212.85353:0	null	0	0	0	0	0	0	2088	2314	2086	2207	2193	2212	2087	1965	2014
77	4.132	212.007	no MS2: Indoxyl sulfate	[M-H]-	null	0.79	False	1.32	212.002	C8H7NO4S	Arylsulfates	BXFFHSIDQOFMLE-UHFFFAOYSA-N	O=S(=O)(O)OC1=CNC=2C=CC=CC12	530	False	True	False	Normalized unit: Intensity; Annotation method: MSMS-Public_all-neg-VS19_1	False	False	77	0	0	1	-1	-1	-1	-1	-1	1	3924.84	QC_2-1_neg_010	212.00250:4007 213.00717:406 214.01184:0	null	0	0	0	0	0	0	7306	5326	12889	2497	5304	16562	468	82	3184
78	6.692	213.114	no MS2: Unknown (carbon number 11); PlaSMA ID-296	[M-H]-	null	0.01	False	5.77	213.112	C11H18O4	Unknown	null	null	530	False	True	False	Normalized unit: Intensity; Annotation method: MSMS-Public_all-neg-VS19_1	False	False	78	0	0	0.98	-1	-1	-1	-1	-1	0.89	18.73	Plasma_008_neg_022	213.11411:1539 214.11877:254 215.12344:0	null	0	0	0	0	0	0	0	0	0	0	0	0	14	3586	131
79	0.698	215.033	no MS2: 5-Methoxypsoralen	[M-H]-	null	0.91	False	7.267	215.035	C12H8O4	5-methoxypsoralens	BGEBZHIAGXMEMV-UHFFFAOYSA-N	O=C1OC=2C=C3OC=CC3=C(OC)C2C=C1	530	False	True	False	Normalized unit: Intensity; Annotation method: MSMS-Public_all-neg-VS19_1	False	False	79	0	0	1	-1	-1	-1	-1	-1	1	47106.8	QC_4-2_neg_035	215.03490:48072 216.03956:3417 217.04423:0	null	0	0	0	0	0	0	156456	138101	139093	150115	141640	137515	132322	123318	120712
80	0.697	215.126	no MS2: (2R)-2-[(2R,5S)-5-[(2S)-2-hydroxybutyl]oxolan-2-yl]propanoic acid	[M-H]-	null	0.49	False	2.566	215.129	C11H20O4	Tetrahydrofurans	HTCUURQJNZBKIA-XFWSIPNHSA-N	O=C(O)C(C)C1OC(CC1)CC(O)CC	530	False	True	False	Normalized unit: Intensity; Annotation method: MSMS-Public_all-neg-VS19_1	False	False	80	0	0	1	-1	-1	-1	-1	-1	1	1458.7	Plasma_004_neg_017	215.12981:1342 216.13447:0 217.13914:0	null	0	0	0	0	0	0	394	476	425	1703	139	324	701	446	280
81	0.698	217.03	no MS2: 4,4`-Thiodiphenol	[M-H]-	null	0.91	False	9.989	217.033	C12H10O2S	Diarylthioethers	VWGKEVWFBOUAND-UHFFFAOYSA-N	OC1=CC=C(SC2=CC=C(O)C=C2)C=C1	530	False	True	False	Normalized unit: Intensity; Annotation method: MSMS-Public_all-neg-VS19_1	False	False	81	0	0	1	-1	-1	-1	-1	-1	1	16520.8	Plasma_025_neg_047	217.03290:17592 218.03757:1139 219.04223:286	null	0	0	0	0	0	0	54733	48268	48784	52558	49971	48401	45995	43248	42505
82	5.042	217.109	no MS2: 3-Hydroxysebacic acid	[M-H]-	null	0.01	False	2.611	217.108	C10H18O5	Medium-chain hydroxy acids and derivatives	OQYZCCKCJQWHIE-UHFFFAOYSA-N	O=C(O)CCCCCCC(O)CC(=O)O	530	False	True	False	Normalized unit: Intensity; Annotation method: MSMS-Public_all-neg-VS19_1	False	False	82	0	0	0.99	-1	-1	-1	-1	-1	0.99	4784.94	Plasma_008_neg_022	217.10941:4761 218.11407:463 219.11874:0	null	0	0	0	0	0	0	37	0	18	17	0	43	338	11255	544
83	0.7	217.114	no MS2: CEL - carboxyethyl lysine	[M-H]-	null	0.06	False	-1	217.119	C9H18N2O4	Alanine and derivatives	XCYPSOHOIAZISD-MLWJPKLSSA-N	CC(C(=O)O)NCCCCC(C(=O)O)N	530	False	True	False	Normalized unit: Intensity; Annotation method: MSMS-Public_all-neg-VS19_1	False	False	83	0	0	0.92	-1	-1	-1	-1	-1	0.92	946.89	QC_4-3_neg_058	217.12340:1216 218.12807:0 219.13273:0	null	0	0	0	0	0	0	398	342	397	297	409	231	365	268	113
84	3.397	218.106	no MS2: trans-Zeatin	[M-H]-	null	0.63	False	-1	218.105	C10H13N5O	6-alkylaminopurines	UZKQTCBAMSWPJD-FARCUNLSSA-N	C/C(=C\CNC1=NC=NC2=C1NC=N2)/CO	530	False	True	False	Normalized unit: Intensity; Annotation method: MSMS-Public_all-neg-VS19_1	False	False	84	0	0	1	-1	-1	-1	-1	-1	1	930.43	Plasma_011_neg_026	218.10471:887 219.10937:0 220.11404:0	null	0	0	0	0	0	0	1885	1471	1512	1794	393	1302	820	1932	883
85	4.012	220.069	Unknown	[M-H]-	null	0.03	False	null	null	null	null	null	null	999	False	False	False	Normalized unit: Intensity	False	False	85	0	0	null	null	null	null	null	null	null	927.94	Plasma_034_neg_063	220.06940:1060 221.07406:0 222.07873:0	null	0	0	0	0	0	0	18	0	0	1568	0	0	0	0	0
86	0.73	225.066	no MS2: Flurenol	[M+CH3COO]-	null	0.04	False	6.3	225.056	C14H10O3	Fluorenes	GXAMYUGOODKVRM-UHFFFAOYSA-N	O=C(O)C3(O)c1ccccc1c2c3cccc2	530	False	True	False	Normalized unit: Intensity; Annotation method: MSMS-Public_all-neg-VS19_1	False	False	86	0	0	0.79	-1	-1	-1	-1	-1	0.79	825.15	Plasma_004_neg_017	225.06250:949 226.06717:0 227.07184:0	null	0	0	0	0	0	0	1858	688	1389	2723	1204	1089	1258	2217	2148
87	0.586	226.967	no MS2: FT-PFSA; C4H5F5O3S	[M-H]-	null	0.91	False	-1	226.981	C4H5F5O3S	Organosulfonic acids	POGJNMOVQNQIGY-UHFFFAOYSA-N	O=S(=O)(O)CCC(F)(F)C(F)(F)F	530	False	True	False	Normalized unit: Intensity; Annotation method: MSMS-Public_all-neg-VS19_1	False	False	87	0	0	0.69	-1	-1	-1	-1	-1	0.69	1590.1	Plasma_046_neg_078	226.97211:1694 227.97677:297 228.98144:0	null	0	0	0	0	0	0	2145	2517	3130	1750	1661	2028	2041	1706	2159
88	2.92	227.069	no MS2: 3,4,5-Trihydroxystilbene; PlaSMA ID-333	[M-H]-	null	0.03	False	5	227.071	C14H12O3	Stilbene glycosides	LUKBXSAWLPMMSZ-UHFFFAOYSA-N	OC1=CC=C(C=CC2=CC(O)=CC(O)=C2)C=C1	530	False	True	False	Normalized unit: Intensity; Annotation method: MSMS-Public_all-neg-VS19_1	False	False	88	0	0	1	-1	-1	-1	-1	-1	1	2292.75	Plasma_018_neg_039	227.07091:932 228.07558:0 229.08024:0	null	0	0	0	0	0	0	316	949	735	108	190	892	561	8549	481
89	2.86	227.072	no MS2: 3,4,5-Trihydroxystilbene; PlaSMA ID-333	[M-H]-	null	0.06	False	5	227.071	C14H12O3	Stilbene glycosides	LUKBXSAWLPMMSZ-UHFFFAOYSA-N	OC1=CC=C(C=CC2=CC(O)=CC(O)=C2)C=C1	530	False	True	False	Normalized unit: Intensity; Annotation method: MSMS-Public_all-neg-VS19_1	False	False	89	0	0	1	-1	-1	-1	-1	-1	1	1512.75	Plasma_029_neg_052	227.07080:1291 228.07547:0 229.08014:0	null	0	0	0	0	0	0	0	949	0	108	190	892	561	8549	481
90	6.91	227.133	no MS2: 9-methoxycarbonyldec-9-enoic acid	[M-H]-	null	0.01	False	4.193	227.129	C12H20O4	Medium-chain fatty acids	ZUNJWEGRDSXKIO-UHFFFAOYSA-N	O=C(OC)C(=C)CCCCCCCC(=O)O	530	False	True	False	Normalized unit: Intensity; Annotation method: MSMS-Public_all-neg-VS19_1	False	False	90	0	0	0.93	-1	-1	-1	-1	-1	0.93	902.88	Plasma_040_neg_070	227.13280:978 228.13746:0 229.14213:0	null	0	0	0	0	0	0	83	12	15	39	188	214	14	0	0
91	0.64	228.906	Unknown	[M-H]-	null	0.91	False	null	null	null	null	null	null	999	False	False	False	Normalized unit: Intensity	False	False	91	0	0	null	null	null	null	null	null	null	1339.92	Plasma_019_neg_040	228.90590:1614 229.91057:0 230.91523:0	null	0	0	0	0	0	0	1620	1647	1636	1688	1722	1720	1605	1569	1684
92	5.883	229.109	no MS2: 2-(6-hydroxyhexyl)-3-methylidenebutanedioic acid	[M-H]-	null	0.01	False	1.926	229.108	C11H18O5	Medium-chain hydroxy acids and derivatives	DHVXMTMJTVCPBB-UHFFFAOYSA-N	O=C(O)C(=C)C(C(=O)O)CCCCCCO	530	False	True	False	Normalized unit: Intensity; Annotation method: MSMS-Public_all-neg-VS19_1	False	False	92	0	0	1	-1	-1	-1	-1	-1	1	22.22	Plasma_008_neg_022	229.10899:2554 230.11366:289 231.11833:0	null	0	0	0	0	0	0	0	0	0	0	0	0	159	5336	158
93	7.309	229.147	no MS2: Dodecanedioic acid	[M-H]-	null	0.71	False	17.454	229.145	C12H22O4	Medium-chain fatty acids	TVIDDXQYHWJXFK-UHFFFAOYSA-N	OC(=O)CCCCCCCCCCC(O)=O	530	False	True	False	Normalized unit: Intensity; Annotation method: MSMS-Public_all-neg-VS19_1	False	False	93	0	0	1	-1	-1	-1	-1	-1	1	1319.86	QC_2-1_neg_010	229.14461:1466 230.14928:205 231.15394:0	null	0	0	0	104	0	0	1782	1663	602	1078	790	4168	1227	2215	310
94	7.174	229.148	no MS2: Dodecanedioic acid	[M-H]-	null	0.04	False	17.454	229.145	C12H22O4	Medium-chain fatty acids	TVIDDXQYHWJXFK-UHFFFAOYSA-N	OC(=O)CCCCCCCCCCC(O)=O	530	False	True	False	Normalized unit: Intensity; Annotation method: MSMS-Public_all-neg-VS19_1	False	False	94	0	0	0.97	-1	-1	-1	-1	-1	0.97	881.67	Plasma_021_neg_043	229.14690:971 230.15156:0 231.15623:0	null	0	0	0	0	0	0	102	0	0	66	0	519	0	22	0
95	0.64	230.901	Unknown	[M-H]-	null	0.91	False	null	null	null	null	null	null	999	False	False	False	Normalized unit: Intensity	False	False	95	0	0	null	null	null	null	null	null	null	879.43	Plasma_006_neg_020	230.90070:1071 231.90536:0 232.91003:0	null	0	0	0	0	0	0	1063	1042	1010	1125	1017	1113	1074	1018	1032
96	4.717	230.998	Unknown	[M-H]-	null	0.01	False	null	null	null	null	null	null	999	False	False	False	Normalized unit: Intensity	False	False	96	0	0	null	null	null	null	null	null	null	1516.88	Plasma_002_neg_015	230.99770:1585 232.00236:0 233.00703:0	null	0	0	0	0	0	0	1315	3608	0	0	0	0	128	95	0
97	3.642	230.999	no MS2: Diuron	[M-H]-	null	0.19	False	10.126	231.01	C9H10Cl2N2O	N-phenylureas	XMTQQYYKAHVGBJ-UHFFFAOYSA-N	CN(C)C(=O)NC1=CC=C(Cl)C(Cl)=C1	530	False	True	False	Normalized unit: Intensity; Annotation method: MSMS-Public_all-neg-VS19_1	False	False	97	0	0	0.73	-1	-1	-1	-1	-1	0.73	1107.28	Plasma_039_neg_069	231.00180:748 232.00647:0 233.01114:0	null	0	0	0	0	0	0	740	289	1511	0	1079	990	473	1967	1457
98	6.187	231.038	Unknown	[M-H]-	null	0.07	False	null	null	null	null	null	null	999	False	False	False	Normalized unit: Intensity	False	False	98	0	0	null	null	null	null	null	null	null	933.39	Plasma_046_neg_078	231.03770:1148 232.04237:0 233.04704:0	null	0	0	0	0	0	0	201	119	236	349	0	661	0	1175	0
99	5.307	231.125	Unknown	[M-H]-	null	0.01	False	null	null	null	null	null	null	999	False	False	False	Normalized unit: Intensity	False	False	99	0	0	null	null	null	null	null	null	null	1804.31	Plasma_008_neg_022	231.12511:2015 232.12977:0 233.13444:0	null	0	0	0	0	0	0	0	0	0	0	0	0	41	3957	14
100	3.213	235.087	no MS2: Carbmazepine	[M-H]-	null	0.01	False	-1	235.088	C15H12N2O	Dibenzazepines	FFGPTBGBLSHEPO-UHFFFAOYSA-N	N=C(O)N1C=2C=CC=CC2C=CC=3C=CC=CC31	530	False	True	False	Normalized unit: Intensity; Annotation method: MSMS-Public_all-neg-VS19_1	False	False	100	0	0	1	-1	-1	-1	-1	-1	1	2296.25	Plasma_030_neg_053	235.08681:2554 236.09148:253 237.09614:0	null	0	0	0	0	0	0	0	0	0	0	0	0	0	0	0
101	0.633	238.932	Unknown	[M-H]-	null	0.91	False	null	null	null	null	null	null	999	False	False	False	Normalized unit: Intensity	False	False	101	0	0	null	null	null	null	null	null	null	2781.06	QC_2-1_neg_010	238.93190:3076 239.93657:0 240.94124:0	null	0	0	0	0	0	13	3065	3120	2993	3262	3215	3190	3176	3140	3186
102	0.633	240.933	Unknown	[M-H]-	null	0.91	False	null	null	null	null	null	null	999	False	False	False	Normalized unit: Intensity	False	False	102	0	0	null	null	null	null	null	null	null	946.28	Plasma_036_neg_066	240.93311:1173 241.93777:0 242.94244:0	null	0	0	0	0	0	0	1048	1032	964	1075	975	1074	1029	975	1021
103	3.251	241.085	no MS2: Equol	[M-H]-	null	0.03	False	1.099	241.087	C15H14O3	Isoflavanols	ADFCQWZHKCXPAJ-UHFFFAOYSA-N	OC1=CC=C(C=C1)C2COC3=CC(O)=CC=C3C2	530	False	True	False	Normalized unit: Intensity; Annotation method: MSMS-Public_all-neg-VS19_1	False	False	103	0	0	0.99	-1	-1	-1	-1	-1	0.99	916.19	Plasma_044_neg_075	241.08830:941 242.09297:0 243.09764:0	null	0	0	0	0	0	0	200	148	212	217	0	308	108	1828	121
104	0.698	242.081	no MS2: Cytidine	[M-H]-	null	0.01	False	1.696	242.078	C9H13N3O5	Pyrimidine nucleosides	UHDGCWIWMRVCDJ-XVFCMESISA-N	C1=CN(C(=O)N=C1N)[C@H]2[C@@H]([C@@H]([C@H](O2)CO)O)O	530	False	True	False	Normalized unit: Intensity; Annotation method: MSMS-Public_all-neg-VS19_1	False	False	104	0	0	0.97	-1	-1	-1	-1	-1	0.97	829.19	Plasma_008_neg_022	242.08051:894 243.08517:0 244.08984:0	null	0	0	0	0	0	0	1214	156	21	490	0	154	302	2142	510
105	6.916	242.176	Unknown	[M-H]-	null	1	False	null	null	null	null	null	null	999	False	False	False	Normalized unit: Intensity	False	False	105	0	0	null	null	null	null	null	null	null	1495.45	Blind_4_neg_008	242.17570:3288 243.18037:614 244.18504:0	null	3670	3716	3585	7616	4050	3734	3683	3768	3638	3642	3725	3645	3557	3329	3651
106	0.586	242.947	Unknown	[M-H]-	null	0.91	False	null	null	null	null	null	null	999	False	False	False	Normalized unit: Intensity	False	False	106	0	0	null	null	null	null	null	null	null	2576.83	Plasma_018_neg_039	242.94701:3240 243.95167:0 244.95634:0	null	0	0	0	32	0	0	4369	4130	3611	3687	3763	3970	3861	4017	3599
107	1.054	243.066	no MS2: URIDINE	[M-H]-	null	0.91	False	1.31	243.062	C9H12N2O6	Pyrimidine nucleosides	DRTQHJPVMGBUCF-XVFCMESISA-N	C1=CN(C(=O)NC1=O)[C@H]2[C@@H]([C@@H]([C@H](O2)CO)O)O	530	False	True	False	Normalized unit: Intensity; Annotation method: MSMS-Public_all-neg-VS19_1	False	False	107	0	0	1	-1	-1	-1	-1	-1	1	1968.82	QC_1-1_neg_009	243.06230:2387 244.06697:265 245.07164:323	null	0	0	0	0	0	0	3986	3380	3829	2738	4986	3264	3847	2920	3977
108	5.488	243.125	no MS2: (5E)-3,4,9-trihydroxy-2-propyl-2,3,4,7,8,9-hexahydrooxecin-10-one	[M-H]-	null	0.01	False	-1	243.124	C12H20O5	Oxocins	KQJGPGHQDDZVHJ-ZZXKWVIFSA-N	O=C1OC(CCC)C(O)C(O)C=CCCC1O	530	False	True	False	Normalized unit: Intensity; Annotation method: MSMS-Public_all-neg-VS19_1	False	False	108	0	0	0.99	-1	-1	-1	-1	-1	0.99	38.33	Plasma_008_neg_022	243.12489:4896 244.12956:595 245.13423:0	null	0	0	0	0	0	0	0	0	276	0	0	0	496	10899	914
109	5.625	243.125	no MS2: (5E)-3,4,9-trihydroxy-2-propyl-2,3,4,7,8,9-hexahydrooxecin-10-one	[M-H]-	null	0.01	False	-1	243.124	C12H20O5	Oxocins	KQJGPGHQDDZVHJ-ZZXKWVIFSA-N	O=C1OC(CCC)C(O)C(O)C=CCCC1O	530	False	True	False	Normalized unit: Intensity; Annotation method: MSMS-Public_all-neg-VS19_1	False	False	109	0	0	0.99	-1	-1	-1	-1	-1	0.99	8.98	Plasma_008_neg_022	243.12520:1166 244.12987:0 245.13453:0	null	0	0	0	0	0	0	0	0	0	0	0	0	0	2667	0
110	5.453	245.013	Unknown	[M-H]-	null	0.01	False	null	null	null	null	null	null	999	False	False	False	Normalized unit: Intensity	False	False	110	0	0	null	null	null	null	null	null	null	8.58	Plasma_002_neg_015	245.01331:975 246.01797:0 247.02264:0	null	0	0	0	0	0	0	0	1939	0	0	0	0	0	0	0
111	0.755	245.058	Unknown	[M-H]-	null	0.04	False	null	null	null	null	null	null	999	False	False	False	Normalized unit: Intensity	False	False	111	0	0	null	null	null	null	null	null	null	992.08	Plasma_038_neg_068	245.05769:1225 246.06236:0 247.06703:0	null	0	0	0	0	0	0	821	200	299	1003	920	17	0	0	40
112	5.167	245.097	no MS2: Indole-3-acetyl-L-alanine; PlaSMA ID-383	[M-H]-	null	0.04	False	4.53	245.093	C13H14N2O3	Amino acids	FBDCJLXTUCMFLF-UHFFFAOYNA-N	CC(NC(=O)CC1=CNC2=C1C=CC=C2)C(O)=O	530	False	True	False	Normalized unit: Intensity; Annotation method: MSMS-Public_all-neg-VS19_1	False	False	112	0	0	0.96	-1	-1	-1	-1	-1	0.96	704.46	Plasma_026_neg_049	245.09610:942 246.10077:0 247.10544:0	null	0	0	0	0	0	0	16	645	1396	438	33	516	0	0	0
113	0.618	248.961	Unknown	[M-H]-	null	1	False	null	null	null	null	null	null	999	False	False	False	Normalized unit: Intensity	False	False	113	0	0	null	null	null	null	null	null	null	9810.47	Plasma_004_neg_017	248.96130:11246 249.96597:517 250.97064:0	null	1557	1533	1553	2048	1508	1578	23329	23002	22638	25834	25553	24681	24665	24240	24697
114	4.69	249.089	Unknown	[M-H]-	null	0.06	False	null	null	null	null	null	null	999	False	False	False	Normalized unit: Intensity	False	False	114	0	0	null	null	null	null	null	null	null	969.81	Plasma_015_neg_030	249.08910:966 250.09376:0 251.09843:0	null	0	0	0	0	0	0	606	141	410	0	0	2081	0	19	0
115	11.18	249.149	no MS2: 2-(4-hydroxy-4a-methyl-8-methylidene-1,2,3,4,5,6,7,8a-octahydronaphthalen-2-yl)prop-2-enoic acid	[M-H]-	null	0.01	False	3.684	249.15	C15H22O3	Eudesmane, isoeudesmane or cycloeudesmane sesquiterpenoids	IBJRJSQUSVUUDO-UHFFFAOYSA-N	O=C(O)C(=C)C1CC(O)C2(C)CCCC(=C)C2C1	530	False	True	False	Normalized unit: Intensity; Annotation method: MSMS-Public_all-neg-VS19_1	False	False	115	0	0	1	-1	-1	-1	-1	-1	1	1159.44	Blind_4_neg_008	249.14931:1293 250.15398:193 251.15864:0	null	923	75	996	2875	1744	1815	1073	721	1731	1805	1662	1713	1808	1616	1663
116	7.677	251.092	no MS2: Trinexapac-ethyl	[M-H]-	null	0.88	False	17.175	251.093	C13H16O5	Vinylogous acids	RVKCCVTVZORVGD-UHFFFAOYSA-N	CCOC(=O)C1CC(=O)C(=C(O)C2CC2)C(=O)C1	530	False	True	False	Normalized unit: Intensity; Annotation method: MSMS-Public_all-neg-VS19_1	False	False	116	0	0	1	-1	-1	-1	-1	-1	1	890.89	QC_4-1_neg_012	251.09241:983 252.09707:0 253.10174:0	null	2466	2377	2422	4328	2426	2502	2637	2507	2550	2350	2523	2422	2369	2099	2393
117	7.563	253.149	no MS2: (E)-2-(hydroxymethyl)-3-[3-(hydroxymethyl)-6-propan-2-ylcyclohex-2-en-1-yl]prop-2-enoic acid	[M-H]-	null	0.01	False	3.135	253.145	C14H22O4	Menthane monoterpenoids	SLVSUVFUFJKMCV-WUXMJOGZSA-N	O=C(O)C(=CC1C=C(CO)CCC1C(C)C)CO	530	False	True	False	Normalized unit: Intensity; Annotation method: MSMS-Public_all-neg-VS19_1	False	False	117	0	0	0.91	-1	-1	-1	-1	-1	0.91	1218.44	Plasma_040_neg_070	253.14890:1218 254.15356:0 255.15823:0	null	0	0	0	0	0	0	104	0	10	36	110	0	14	0	0
118	5.553	254.907	Unknown	[M-H]-	null	0.04	False	null	null	null	null	null	null	999	False	False	False	Normalized unit: Intensity	False	False	118	0	0	null	null	null	null	null	null	null	4994.52	Plasma_006_neg_020	254.90680:10401 255.91147:652 256.91613:0	null	0	0	0	0	0	0	0	5483	0	0	6697	27779	0	0	0
119	8.007	255.165	no MS2: bakuchiol	[M-H]-	null	0.5	False	-1	255.175	C18H24O	Aromatic monoterpenoids	LFYJSSARVMHQJB-QIXNEVBVSA-N	OC1=CC=C(C=C1)C=CC(C=C)(C)CCC=C(C)C	530	False	True	False	Normalized unit: Intensity; Annotation method: MSMS-Public_all-neg-VS19_1	False	False	119	0	0	0.66	-1	-1	-1	-1	-1	0.66	1291.35	QC_4-4_neg_083	255.16631:1017 256.17097:0 257.17564:0	null	0	0	0	0	0	0	3418	1907	2384	2250	2811	2765	2500	1509	792
120	7.833	255.165	no MS2: bakuchiol	[M-H]-	null	0.06	False	-1	255.175	C18H24O	Aromatic monoterpenoids	LFYJSSARVMHQJB-QIXNEVBVSA-N	OC1=CC=C(C=C1)C=CC(C=C)(C)CCC=C(C)C	530	False	True	False	Normalized unit: Intensity; Annotation method: MSMS-Public_all-neg-VS19_1	False	False	120	0	0	0.65	-1	-1	-1	-1	-1	0.65	1068.38	Plasma_044_neg_075	255.16611:919 256.17077:0 257.17544:0	null	0	0	0	0	0	0	571	54	0	0	0	2218	483	845	0
121	0.733	256.063	no MS2: Metolachlor-TP CGA 368208	[M-H]-	null	0.03	False	3.94	256.065	C11H15NO4S	Anilides	QPVPJECIHVSBLZ-UHFFFAOYSA-N	CCC1=C(NC(=O)CS(O)(=O)=O)C(C)=CC=C1	530	False	True	False	Normalized unit: Intensity; Annotation method: MSMS-Public_all-neg-VS19_1	False	False	121	0	0	0.98	-1	-1	-1	-1	-1	0.98	1477.06	Plasma_017_neg_038	256.06271:1692 257.06738:2268 258.07205:0	null	0	0	0	0	0	0	337	42	295	186	914	3225	990	560	603
122	5.552	256.904	Unknown	[M-H]-	null	0.04	False	null	null	null	null	null	null	999	False	False	False	Normalized unit: Intensity	False	False	122	0	0	null	null	null	null	null	null	null	5205.42	Plasma_006_neg_020	256.90359:10667 257.90826:489 258.91293:0	null	0	0	0	0	0	0	0	5553	0	0	6991	28264	0	0	0
123	0.71	257.059	no MS2: Thalidomide	[M-H]-	null	0.74	False	16.757	257.057	C13H10N2O4	Phthalimides	UEJJHQNACJXSKW-UHFFFAOYSA-N	O=C1N(C2CCC(=O)NC2=O)C(=O)C2=CC=CC=C12	530	False	True	False	Normalized unit: Intensity; Annotation method: MSMS-Public_all-neg-VS19_1	False	False	123	0	0	1	-1	-1	-1	-1	-1	1	2446.45	Plasma_014_neg_029	257.05670:2054 258.06137:202 259.06604:0	null	0	0	0	0	0	0	6196	0	3260	8272	10113	8718	1611	307	1560
124	1.465	257.078	no MS2: 5-Methyluridine	[2M-H]-	null	0.03	False	2.209	257.078	C10H14N2O6	Pyrimidine nucleosides	DWRXFEITVBNRMK-JXOAFFINSA-N	O=C1N=C(O)C(=CN1C2OC(CO)C(O)C2O)C	530	False	True	False	Normalized unit: Intensity; Annotation method: MSMS-Public_all-neg-VS19_1	False	False	124	0	0	1	-1	-1	-1	-1	-1	1	1108.66	Plasma_001_neg_014	257.07831:1234 258.08298:189 259.08764:0	null	0	0	0	0	0	0	3663	2980	1285	716	19	75	150	600	1139
125	5.492	257.104	Unknown	[M-H]-	null	0.01	False	null	null	null	null	null	null	999	False	False	False	Normalized unit: Intensity	False	False	125	0	0	null	null	null	null	null	null	null	10.24	Plasma_008_neg_022	257.10449:1349 258.10916:0 259.11383:0	null	0	0	0	0	0	0	0	0	0	0	0	0	0	3025	0
126	8.218	257.178	Unknown	[M-H]-	null	0.79	False	null	null	null	null	null	null	999	False	False	False	Normalized unit: Intensity	False	False	126	0	0	null	null	null	null	null	null	null	3917.93	Plasma_017_neg_038	257.17810:10092 258.18277:1420 259.18744:255	null	0	0	0	0	0	0	3008	2652	195	3088	0	9607	697	5993	34
127	8.409	257.181	Unknown	[M-H]-	null	0.06	False	null	null	null	null	null	null	999	False	False	False	Normalized unit: Intensity	False	False	127	0	0	null	null	null	null	null	null	null	1770.66	Plasma_040_neg_070	257.18069:3704 258.18536:638 259.19003:0	null	0	0	0	0	0	0	530	928	747	42	1286	84	613	225	317
128	5.551	258.901	Unknown	[M-H]-	null	0.03	False	null	null	null	null	null	null	999	False	False	False	Normalized unit: Intensity	False	False	128	0	0	null	null	null	null	null	null	null	2190.38	Plasma_006_neg_020	258.90121:3696 259.90588:163 260.91055:0	null	0	0	0	0	0	0	0	1667	0	0	2039	9378	0	0	0
129	0.714	258.986	Unknown	[M-H]-	null	0.91	False	null	null	null	null	null	null	999	False	False	False	Normalized unit: Intensity	False	False	129	0	0	null	null	null	null	null	null	null	2124.17	Plasma_023_neg_045	258.98581:3288 259.99048:251 260.99514:0	null	0	0	0	0	0	0	3081	6448	5966	5906	5235	4824	5304	4707	5487
130	4.055	258.995	Unknown	[M-H]-	null	0.18	False	null	null	null	null	null	null	999	False	False	False	Normalized unit: Intensity	False	False	130	0	0	null	null	null	null	null	null	null	1137	Plasma_025_neg_047	258.99509:1762 259.99975:0 261.00442:0	null	0	0	0	0	0	0	1649	374	369	401	0	3261	548	451	0
131	0.713	259.057	no MS2: 2,3,4'-Trihydroxy-4-Methoxybenzophenone	[M-H]-	null	0.22	False	3.197	259.061	C14H12O5	Benzophenones	YYQLEVUVEAKBKB-UHFFFAOYSA-N	O=C(C1=CC=C(O)C=C1)C2=CC=C(OC)C(O)=C2O	530	False	True	False	Normalized unit: Intensity; Annotation method: MSMS-Public_all-neg-VS19_1	False	False	131	0	0	0.94	-1	-1	-1	-1	-1	0.94	1127.52	QC_4-4_neg_083	259.05780:1136 260.06247:0 261.06714:0	null	0	0	0	0	0	0	597	0	1889	2948	3712	1690	296	60	382
132	2.61	260.024	no MS2: Phosphotyrosine	[M-H]-	null	0.01	False	9.72	260.033	C9H12NO6P	Phenylalanine and derivatives	DCWXELXMIBXGTH-UHFFFAOYSA-N	O=C(O)C(N)CC1=CC=C(OP(=O)(O)O)C=C1	530	False	True	False	Normalized unit: Intensity; Annotation method: MSMS-Public_all-neg-VS19_1	False	False	132	0	0	0.7	-1	-1	-1	-1	-1	0.7	871.13	Plasma_003_neg_016	260.02451:866 261.02917:0 262.03384:0	null	0	0	0	0	0	0	2724	632	2306	159	1507	127	168	41	343
133	5.5	260.115	no MS2: Mycosporine serinol	[M-H]-	null	0.01	False	-1	260.114	C11H19NO6	Cyclohexenones	VVTDHOIRNPCGTH-NSHDSACASA-N	COC1=C(NC(CO)CO)C[C@](CO)(O)CC1=O	530	False	True	False	Normalized unit: Intensity; Annotation method: MSMS-Public_all-neg-VS19_1	False	False	133	0	0	0.99	-1	-1	-1	-1	-1	0.99	868.44	Plasma_008_neg_022	260.11551:989 261.12018:0 262.12484:0	null	0	0	0	0	0	0	0	0	0	0	0	0	16	1680	0
134	0.714	260.983	Unknown	[M-H]-	null	0.91	False	null	null	null	null	null	null	999	False	False	False	Normalized unit: Intensity	False	False	134	0	0	null	null	null	null	null	null	null	2247.5	Plasma_023_neg_045	260.98291:3590 261.98758:285 262.99225:0	null	0	0	0	0	0	0	5935	4066	6200	5977	5301	4934	3572	4856	5978
135	2.943	263.045	no MS2: Deoxyuridine	[M+Cl]-	null	0.01	False	0.441	263.043	C9H12N2O5	Pyrimidine 2'-deoxyribonucleosides	MXHRCPNRJAMMIM-SHYZEUOFSA-N	O=C1N=C(O)C=CN1C2OC(CO)C(O)C2	530	False	True	False	Normalized unit: Intensity; Annotation method: MSMS-Public_all-neg-VS19_1	False	False	135	0	0	0.97	-1	-1	-1	-1	-1	0.97	1558.75	Plasma_008_neg_022	263.04529:1717 264.04996:0 265.05462:0	null	0	0	0	0	0	0	68	419	538	29	34	424	134	3751	53
136	2.835	263.049	no MS2: 2',2'-Difluoro-2'-deoxyuridine	[M+Cl]-	null	0.01	False	1.9	263.048	C9H10F2N2O5	Pyrimidine 2'-deoxyribonucleosides	FIRDBEQIJQERSE-QPPQHZFASA-N	O=C/1NC(=O)N(\C=C\1)[C@@H]2O[C@@H]([C@@H](O)C2(F)F)CO	530	False	True	False	Normalized unit: Intensity; Annotation method: MSMS-Public_all-neg-VS19_1	False	False	136	0	0	1	-1	-1	-1	-1	-1	1	1376.31	Plasma_044_neg_075	263.04941:1404 264.05408:0 265.05874:0	null	0	0	0	0	0	0	0	0	0	0	0	0	82	0	33
137	0.62	264.935	no MS2: PFAP-PAP; C3H2F7O4P	[M-H]-	null	0.18	False	-1	264.951	C3H2F7O4P	Monoalkyl phosphates	NVBJAOSFGHCYEU-UHFFFAOYSA-N	O=P(O)(O)OC(F)(F)C(F)(F)C(F)(F)F	530	False	True	False	Normalized unit: Intensity; Annotation method: MSMS-Public_all-neg-VS19_1	False	False	137	0	0	0.68	-1	-1	-1	-1	-1	0.68	781.78	Plasma_046_neg_078	264.94180:900 265.94647:0 266.95114:0	null	66	96	117	359	89	257	1390	1271	1636	1405	1509	1488	1467	1803	1362
138	7.308	264.991	Unknown	[M-H]-	null	0.03	False	null	null	null	null	null	null	999	False	False	False	Normalized unit: Intensity	False	False	138	0	0	null	null	null	null	null	null	null	1182.03	Blind_4_neg_008	264.99100:1486 265.99567:0 267.00033:0	null	3989	2053	1428	7908	1497	1482	3249	1628	1126	2950	1073	1953	3177	1228	2993
139	9.717	265.147	no MS2: Dodecyl sulfate; PlaSMA ID-444	[M-H]-	null	0.93	False	8.65	265.147	C12H26O4S	Sulfate containing metabolites	MOTZDAYCYVMXPC-UHFFFAOYSA-N	O=S(=O)(O)OCCCCCCCCCCCC	530	False	True	False	Normalized unit: Intensity; Annotation method: MSMS-Public_all-neg-VS19_1	False	False	139	0	0	1	-1	-1	-1	-1	-1	1	1448.81	Blind_4_neg_008	265.14740:3289 266.15207:506 267.15674:0	null	6680	6488	6380	11678	6763	6615	5407	2807	6110	2876	6775	5490	5046	4375	3073
140	0.667	266.808	Unknown	[M-H]-	null	0.91	False	null	null	null	null	null	null	999	False	False	False	Normalized unit: Intensity	False	False	140	0	0	null	null	null	null	null	null	null	2697.85	Plasma_036_neg_066	266.80820:3272 267.81286:0 268.81753:0	null	0	0	0	0	0	0	3748	3964	3610	3882	3845	3926	3466	3428	3636
141	2.979	267.079	no MS2: methyl 1-oxo-4-(1H-pyrrol-2-yl)-2H-isoquinoline-3-carboxylate	[M-H]-	null	0.07	False	2.273	267.078	C15H12N2O3	Isoquinolones and derivatives	IADWMRZHOGHTMQ-UHFFFAOYSA-N	O=C(OC)C1=NC(O)=C2C=CC=CC2=C1C3=CC=CN3	530	False	True	False	Normalized unit: Intensity; Annotation method: MSMS-Public_all-neg-VS19_1	False	False	141	0	0	1	-1	-1	-1	-1	-1	1	1140.6	Plasma_017_neg_038	267.07730:1211 268.08197:0 269.08664:0	null	0	0	0	0	0	0	0	0	0	0	0	0	0	1559	857
142	0.666	268.806	Unknown	[M-H]-	null	0.91	False	null	null	null	null	null	null	999	False	False	False	Normalized unit: Intensity	False	False	142	0	0	null	null	null	null	null	null	null	4324.9	Plasma_036_neg_066	268.80560:5027 269.81027:0 270.81494:0	null	0	0	0	0	0	0	6125	6335	5755	6287	6305	6299	5798	5546	5856
143	0.667	270.801	Unknown	[M-H]-	null	0.91	False	null	null	null	null	null	null	999	False	False	False	Normalized unit: Intensity	False	False	143	0	0	null	null	null	null	null	null	null	2832.57	Plasma_016_neg_037	270.80060:3191 271.80527:0 272.80993:0	null	0	0	0	0	0	0	4023	4203	3825	4143	4136	4157	3766	3603	3726
144	0.666	272.797	Unknown	[M-H]-	null	0.9	False	null	null	null	null	null	null	999	False	False	False	Normalized unit: Intensity	False	False	144	0	0	null	null	null	null	null	null	null	933.16	Plasma_016_neg_037	272.79721:1212 273.80188:0 274.80655:0	null	0	0	0	0	0	0	1147	1249	1099	1238	1284	1257	1124	1079	1104
145	0.57	272.963	Unknown	[M-H]-	null	0.63	False	null	null	null	null	null	null	999	False	False	False	Normalized unit: Intensity	False	False	145	0	0	null	null	null	null	null	null	null	1990.13	Plasma_017_neg_038	272.96259:3222 273.96725:958 274.97192:0	null	0	0	0	0	0	0	1611	5917	6084	1065	1196	1969	1981	1327	1967
146	2.914	273.075	no MS2: Phloretin	[M+HCOO]-	null	0.04	False	1.408	273.077	C15H14O5	2'-Hydroxy-dihydrochalcones	VGEREEWJJVICBM-UHFFFAOYSA-N	O=C(C=1C(O)=CC(O)=CC1O)CCC2=CC=C(O)C=C2	530	False	True	False	Normalized unit: Intensity; Annotation method: MSMS-Public_all-neg-VS19_1	False	False	146	0	0	1	-1	-1	-1	-1	-1	1	1888.73	Plasma_018_neg_039	273.07681:939 274.08148:0 275.08615:0	null	0	0	0	0	0	0	400	993	1199	240	370	920	609	8810	246
147	0.807	273.075	no MS2: 5-Methoxyuridine	[M-H2O-H]-	null	0.01	False	4.624	273.073	C10H14N2O7	Pyrimidine nucleosides	ZXIATBNUWJBBGT-JXOAFFINSA-N	O=C1N=C(O)C(OC)=CN1C2OC(CO)C(O)C2O	530	False	True	False	Normalized unit: Intensity; Annotation method: MSMS-Public_all-neg-VS19_1	False	False	147	0	0	0.98	-1	-1	-1	-1	-1	0.98	1481	Plasma_014_neg_029	273.07480:1541 274.07947:0 275.08413:0	null	0	0	0	0	0	0	2429	1948	2584	1279	1857	2309	1267	2671	1189
148	2.86	273.079	no MS2: Phloretin	[M+HCOO]-	null	0.06	False	1.408	273.077	C15H14O5	2'-Hydroxy-dihydrochalcones	VGEREEWJJVICBM-UHFFFAOYSA-N	O=C(C=1C(O)=CC(O)=CC1O)CCC2=CC=C(O)C=C2	530	False	True	False	Normalized unit: Intensity; Annotation method: MSMS-Public_all-neg-VS19_1	False	False	148	0	0	0.99	-1	-1	-1	-1	-1	0.99	1559.27	Plasma_029_neg_052	273.07800:1250 274.08267:0 275.08734:0	null	0	0	0	0	0	0	400	993	0	0	0	920	609	8810	246
149	0.571	274.96	Unknown	[M-H]-	null	0.03	False	null	null	null	null	null	null	999	False	False	False	Normalized unit: Intensity	False	False	149	0	0	null	null	null	null	null	null	null	1066.84	Plasma_017_neg_038	274.96021:1164 275.96487:0 276.96954:0	null	0	0	0	0	0	0	464	685	840	901	331	366	661	779	1636
150	8.15	274.976	no MS2: PFCA-unsaturated; C6HF9O2	[M-H]-	null	0.01	False	-1	274.976	C6HF9O2	Medium-chain fatty acids	ILMHCBGSBAFMEB-OWOJBTEDSA-N	O=C(O)C(F)(F)C(F)(F)C(F)=C(F)C(F)(F)F	530	False	True	False	Normalized unit: Intensity; Annotation method: MSMS-Public_all-neg-VS19_1	False	False	150	0	0	1	-1	-1	-1	-1	-1	1	1006.25	Blind_4_neg_008	274.97610:1027 275.98077:0 276.98544:0	null	1276	1120	1194	2442	1325	453	1300	1273	1302	1277	1169	1241	1280	1147	868
151	3.999	276.101	Unknown	[M-H]-	null	0.03	False	null	null	null	null	null	null	999	False	False	False	Normalized unit: Intensity	False	False	151	0	0	null	null	null	null	null	null	null	1339.28	Plasma_013_neg_028	276.10110:1721 277.10577:285 278.11044:0	null	0	0	0	0	0	0	15	0	0	0	0	0	0	32	0
152	0.652	276.834	Unknown	[M-H]-	null	0.88	False	null	null	null	null	null	null	999	False	False	False	Normalized unit: Intensity	False	False	152	0	0	null	null	null	null	null	null	null	953.18	Plasma_015_neg_030	276.83450:1164 277.83917:0 278.84384:0	null	0	0	0	0	0	0	1290	1331	1196	1293	1119	1299	1190	1180	1135
153	0.714	277.037	no MS2: Exifone	[M-H]-	null	0.82	False	11.414	277.035	C13H10O7	Benzophenones	XEDWWPGWIXPVRQ-UHFFFAOYSA-N	OC1=CC=C(C(=O)C2=CC(O)=C(O)C(O)=C2)C(O)=C1O	530	False	True	False	Normalized unit: Intensity; Annotation method: MSMS-Public_all-neg-VS19_1	False	False	153	0	0	1	-1	-1	-1	-1	-1	1	434.71	Plasma_012_neg_027	277.03540:2534 278.04007:180 279.04474:0	null	0	0	0	0	0	0	4889	3124	2299	3495	2211	1838	3597	3457	2753
154	3.237	277.062	no MS2: (1S,4S,8R,14S)-11-ethyl-12-oxo-7,9,13-trioxatetracyclo[6.5.1.0?,??.0?,??]tetradeca-2,5-diene-5-carboxylic acid	[M+Cl]-	null	0.09	False	2.732	277.072	C14H14O6	Terpene lactones	GRJLGDWPUYQSHL-LOJYNRMOSA-N	O=C(O)C1=COC2OC3C(C(=O)OC43C=CC1C24)CC	530	False	True	False	Normalized unit: Intensity; Annotation method: MSMS-Public_all-neg-VS19_1	False	False	154	0	0	0.81	-1	-1	-1	-1	-1	0.81	462.3	Plasma_044_neg_075	277.06531:1018 278.06998:0 279.07464:0	null	0	0	0	0	0	0	532	854	1002	733	377	897	519	1903	460
155	0.652	278.833	Unknown	[M-H]-	null	0.91	False	null	null	null	null	null	null	999	False	False	False	Normalized unit: Intensity	False	False	155	0	0	null	null	null	null	null	null	null	1225.35	Plasma_016_neg_037	278.83279:1376 279.83746:0 280.84213:0	null	0	0	0	0	0	0	1785	1587	1596	1781	1739	1470	1518	1528	1579
156	3.677	280.09	Unknown	[M-H]-	null	0.03	False	null	null	null	null	null	null	999	False	False	False	Normalized unit: Intensity	False	False	156	0	0	null	null	null	null	null	null	null	1322.75	Plasma_016_neg_037	280.08969:1767 281.09436:0 282.09903:0	null	0	0	0	0	0	0	192	0	0	0	865	0	794	241	0
157	0.726	280.109	no MS2: 1-METHYLADENOSINE	[M-H]-	null	0.04	False	1.318	280.105	C11H15N5O4	Purine nucleosides	GFYLSDSUCHVORB-IOSLPCCCSA-N	CN1C=NC2=C(C1=N)N=CN2[C@H]3[C@@H]([C@@H]([C@H](O3)CO)O)O	530	False	True	False	Normalized unit: Intensity; Annotation method: MSMS-Public_all-neg-VS19_1	False	False	157	0	0	1	-1	-1	-1	-1	-1	1	945.27	Plasma_013_neg_028	280.10550:929 281.11017:0 282.11483:0	null	0	0	0	0	0	0	1387	376	344	1024	114	622	375	83	66
158	0.667	282.779	Unknown	[M-H]-	null	0.12	False	null	null	null	null	null	null	999	False	False	False	Normalized unit: Intensity	False	False	158	0	0	null	null	null	null	null	null	null	832.59	Plasma_003_neg_016	282.77850:916 283.78317:0 284.78784:0	null	0	0	0	0	0	0	1108	1071	1216	963	1038	975	951	1073	925
159	4.708	283.088	no MS2: Helicin	[M-H]-	null	0.03	False	2.003	283.082	C13H16O7	Phenolic glycosides	BGOFCVIGEYGEOF-UJPOAAIJSA-N	O=CC=1C=CC=CC1OC2OC(CO)C(O)C(O)C2O	530	False	True	False	Normalized unit: Intensity; Annotation method: MSMS-Public_all-neg-VS19_1	False	False	159	0	0	0.91	-1	-1	-1	-1	-1	0.91	1415.03	Plasma_030_neg_053	283.08679:890 284.09146:0 285.09613:0	null	0	0	0	0	0	0	0	0	0	0	1421	0	0	0	938
160	8.977	283.196	Unknown	[M-H]-	null	0.06	False	null	null	null	null	null	null	999	False	False	False	Normalized unit: Intensity	False	False	160	0	0	null	null	null	null	null	null	null	2585.38	Plasma_040_neg_070	283.19629:5697 284.20096:1150 285.20562:0	null	0	0	0	0	0	0	796	423	272	98	1272	46	399	424	18
161	0.852	284.023	Unknown	[M-H]-	null	0.03	False	null	null	null	null	null	null	999	False	False	False	Normalized unit: Intensity	False	False	161	0	0	null	null	null	null	null	null	null	1410.56	Plasma_030_neg_053	284.02341:1611 285.02807:205 286.03274:0	null	0	0	0	0	0	0	82	0	15	71	598	168	117	22	1278
162	0.666	284.775	Unknown	[M-H]-	null	0.91	False	null	null	null	null	null	null	999	False	False	False	Normalized unit: Intensity	False	False	162	0	0	null	null	null	null	null	null	null	1272.87	Plasma_003_neg_016	284.77509:1559 285.77975:0 286.78442:0	null	0	0	0	0	0	0	1926	1927	2085	1851	1875	1901	1776	2001	1614
163	5.514	285.116	Unknown	[M-H]-	null	0.06	False	null	null	null	null	null	null	999	False	False	False	Normalized unit: Intensity	False	False	163	0	0	null	null	null	null	null	null	null	942.52	Plasma_017_neg_038	285.11569:1076 286.12036:0 287.12503:0	null	0	0	0	0	0	0	0	440	0	0	0	2204	0	0	0
164	9.518	285.212	no MS2: C16H30O4; PlaSMA ID-521	[M-H]-	null	0.01	False	9	285.207	C16H30O4	Formula predicted	null	null	530	False	True	False	Normalized unit: Intensity; Annotation method: MSMS-Public_all-neg-VS19_1	False	False	164	0	0	0.86	-1	-1	-1	-1	-1	0.77	924.94	Plasma_042_neg_073	285.21219:971 286.21686:0 287.22152:0	null	0	0	0	0	0	0	24	13	14	0	290	20	32	22	0
165	0.666	286.773	Unknown	[M-H]-	null	0.85	False	null	null	null	null	null	null	999	False	False	False	Normalized unit: Intensity	False	False	165	0	0	null	null	null	null	null	null	null	896.52	Plasma_003_neg_016	286.77280:1080 287.77746:0 288.78213:504	null	0	0	0	0	0	0	1308	1322	1432	1225	1201	1295	1165	1326	1111
166	0.644	286.866	Unknown	[M-H]-	null	0.91	False	null	null	null	null	null	null	999	False	False	False	Normalized unit: Intensity	False	False	166	0	0	null	null	null	null	null	null	null	1235.25	Plasma_041_neg_072	286.86630:1522 287.87097:0 288.87564:0	null	0	0	0	0	0	0	1450	1534	1378	1539	1453	1531	1421	1387	1420
167	3.251	287.09	no MS2: Deoxyuridine	[M+HCOO]-	null	0.03	False	0.43	287.088	C9H12N2O5	Pyrimidine 2'-deoxyribonucleosides	MXHRCPNRJAMMIM-SHYZEUOFSA-N	O=C1N=C(O)C=CN1C2OC(CO)C(O)C2	530	False	True	False	Normalized unit: Intensity; Annotation method: MSMS-Public_all-neg-VS19_1	False	False	167	0	0	0.99	-1	-1	-1	-1	-1	0.99	1086.53	Plasma_008_neg_022	287.08990:1235 288.09457:0 289.09924:0	null	0	0	0	0	0	0	276	433	517	330	33	452	228	2225	206
168	0.707	288.778	Unknown	[M-H]-	null	0.04	False	null	null	null	null	null	null	999	False	False	False	Normalized unit: Intensity	False	False	168	0	0	null	null	null	null	null	null	null	2481.38	QC_1-1_neg_009	288.77789:3707 289.78256:0 290.78723:0	null	0	0	0	1363	0	0	1551	2929	708	1623	1196	366	295	337	357
169	0.644	288.861	Unknown	[M-H]-	null	0.91	False	null	null	null	null	null	null	999	False	False	False	Normalized unit: Intensity	False	False	169	0	0	null	null	null	null	null	null	null	1200.07	Plasma_016_neg_037	288.86111:1322 289.86578:0 290.87045:0	null	0	0	0	0	0	0	1496	1483	1340	1513	1437	1522	1345	1298	1380
170	0.563	288.938	Unknown	[M-H]-	null	0.84	False	null	null	null	null	null	null	999	False	False	False	Normalized unit: Intensity	False	False	170	0	0	null	null	null	null	null	null	null	6043.34	Plasma_003_neg_016	288.93790:7265 289.94256:1511 290.94723:0	null	0	0	0	77	0	0	18237	12344	9909	14521	14346	17298	16608	9931	17691
171	0.956	289.073	no MS2: Catechin; PlaSMA ID-530	[M-H]-	null	0.04	False	3.11	289.072	C15H14O6	Flavanol O-glycosides	PFTAWBLQPZVEMU-UHFFFAOYNA-N	OC=3C=C(O)C2=C(OC(C=1C=CC(O)=C(O)C=1)C(O)C2)C=3	530	False	True	False	Normalized unit: Intensity; Annotation method: MSMS-Public_all-neg-VS19_1	False	False	171	0	0	0.99	-1	-1	-1	-1	-1	0.99	1101.73	Plasma_036_neg_066	289.07281:1525 290.07748:0 291.08215:9077	null	0	0	0	0	0	0	15	0	0	0	12	65	322	715	803
172	0.813	291.084	no MS2: NCGC00380743-01!4-[(3-acetyl-2,6-dihydroxy-5-methylphenyl)methyl]-3-hydroxy-2-methyl-2H-furan-5-one	[M-H]-	null	0.91	False	-1	291.087	C15H16O6	Alkyl-phenylketones	YLIUZRWENFNXMA-UHFFFAOYSA-N	CC1OC(=O)C(CC2=C(O)C(=CC(C)=C2O)C(C)=O)=C1O	530	False	True	False	Normalized unit: Intensity; Annotation method: MSMS-Public_all-neg-VS19_1	False	False	172	0	0	1	-1	-1	-1	-1	-1	1	1449.33	Plasma_029_neg_052	291.08749:56037 292.09216:6532 293.09683:1381	null	0	0	0	0	0	0	588035	542227	663160	398242	491162	494559	410443	514103	387724
173	1.037	291.086	no MS2: NCGC00380743-01!4-[(3-acetyl-2,6-dihydroxy-5-methylphenyl)methyl]-3-hydroxy-2-methyl-2H-furan-5-one	[M-H]-	null	0.18	False	-1	291.087	C15H16O6	Alkyl-phenylketones	YLIUZRWENFNXMA-UHFFFAOYSA-N	CC1OC(=O)C(CC2=C(O)C(=CC(C)=C2O)C(C)=O)=C1O	530	False	True	False	Normalized unit: Intensity; Annotation method: MSMS-Public_all-neg-VS19_1	False	False	173	0	0	1	-1	-1	-1	-1	-1	1	82.23	Plasma_028_neg_051	291.08749:11981 292.09216:1301 293.09683:358	null	0	0	0	0	0	0	17823	45464	55250	91573	46096	64543	39562	29889	17080
174	0.808	291.175	Unknown	[M-H]-	null	0.01	False	null	null	null	null	null	null	999	False	False	False	Normalized unit: Intensity	False	False	174	0	0	null	null	null	null	null	null	null	1794.63	QC_1-3_neg_055	291.17490:2422 292.17956:298 293.18423:0	null	0	0	0	0	0	0	173	374	256	285	230	699	548	302	588
175	0.814	291.193	no MS2: 8-[3-oxo-2-[(E)-pent-2-enyl]cyclopenten-1-yl]octanoic acid	[M-H]-	null	0.12	False	4.8	291.197	C18H28O3	Medium-chain fatty acids	RHVWQVSLVMXMBR-XVNBXDOJSA-N	O=C(O)CCCCCCCC1=C(C(=O)CC1)CC=CCC	530	False	True	False	Normalized unit: Intensity; Annotation method: MSMS-Public_all-neg-VS19_1	False	False	175	0	0	1	-1	-1	-1	-1	-1	1	1518.66	QC_3-3_neg_057	291.19650:3010 292.20117:0 293.20584:0	null	0	0	0	0	0	0	507	425	617	356	383	276	429	370	689
176	8.98	293.175	no MS2: [6]-Gingerol; PlaSMA ID-553	[M-H]-	null	1	False	7.45	293.176	C17H26O4	Others	NLDDIKRKFXEWBK-UHFFFAOYNA-N	CCCCCC(O)CC(=O)CCC1=CC=C(O)C(OC)=C1	530	False	True	False	Normalized unit: Intensity; Annotation method: MSMS-Public_all-neg-VS19_1	False	False	176	0	0	1	-1	-1	-1	-1	-1	1	243.87	Plasma_006_neg_020	293.17599:1584 294.18066:283 295.18533:0	null	4301	4152	4196	7351	4370	4402	4362	4338	4393	4144	4369	4334	4134	4060	4285
177	8.361	293.175	no MS2: Sodium Tetradecyl Sulfate	[M-H]-	null	0.21	False	8.768	293.179	C14H30O4S	Sulfuric acid monoesters	URLJMZWTXZTZRR-UHFFFAOYSA-N	O=S(=O)(O)OCCCCCCCCCCCCCC	530	False	True	False	Normalized unit: Intensity; Annotation method: MSMS-Public_all-neg-VS19_1	False	False	177	0	0	1	-1	-1	-1	-1	-1	1	359.54	Plasma_017_neg_038	293.17899:923 294.18365:0 295.18832:0	null	1860	1702	1913	3651	1963	1897	1796	1880	1843	1794	1574	1905	936	1767	1958
178	9.76	293.213	no MS2: FA 18:2+O; PlaSMA ID-565	[M-H]-	null	0.01	False	10.4	293.212	C18H30O3	Oxidized fatty acids	HKSDVVJONLXYKL-UHFFFAOYNA-N	O=C(O)CCCCCCCC=CCC=CCC1OC1(CC)	530	False	True	False	Normalized unit: Intensity; Annotation method: MSMS-Public_all-neg-VS19_1	False	False	178	0	0	1	-1	-1	-1	-1	-1	1	3.19	Plasma_008_neg_022	293.21329:1248 294.21796:181 295.22262:0	null	0	0	0	0	0	0	282	22	31	219	0	165	74	2507	323
179	8.65	293.213	no MS2: FA 18:2+O; PlaSMA ID-565	[M-H]-	null	0.01	False	10.4	293.212	C18H30O3	Oxidized fatty acids	HKSDVVJONLXYKL-UHFFFAOYNA-N	O=C(O)CCCCCCCC=CCC=CCC1OC1(CC)	530	False	True	False	Normalized unit: Intensity; Annotation method: MSMS-Public_all-neg-VS19_1	False	False	179	0	0	1	-1	-1	-1	-1	-1	1	6.59	Plasma_008_neg_022	293.21329:2401 294.21796:446 295.22262:0	null	0	0	0	0	0	0	102	15	192	41	0	23	353	8886	483
180	9.908	293.214	no MS2: FA 18:2+O; PlaSMA ID-565	[M-H]-	null	0.01	False	10.4	293.212	C18H30O3	Oxidized fatty acids	HKSDVVJONLXYKL-UHFFFAOYNA-N	O=C(O)CCCCCCCC=CCC=CCC1OC1(CC)	530	False	True	False	Normalized unit: Intensity; Annotation method: MSMS-Public_all-neg-VS19_1	False	False	180	0	0	0.99	-1	-1	-1	-1	-1	0.99	4.81	Plasma_008_neg_022	293.21399:1665 294.21866:313 295.22332:0	null	0	0	0	0	0	0	348	15	17	855	0	0	490	3981	1082
181	10.517	293.214	no MS2: FA 18:2+O; PlaSMA ID-565	[M-H]-	null	0.01	False	10.4	293.212	C18H30O3	Oxidized fatty acids	HKSDVVJONLXYKL-UHFFFAOYNA-N	O=C(O)CCCCCCCC=CCC=CCC1OC1(CC)	530	False	True	False	Normalized unit: Intensity; Annotation method: MSMS-Public_all-neg-VS19_1	False	False	181	0	0	0.98	-1	-1	-1	-1	-1	0.98	6.52	Plasma_008_neg_022	293.21451:2319 294.21918:458 295.22384:0	null	0	0	0	0	0	0	121	0	13	18	0	0	640	6262	627
182	10.638	293.215	no MS2: FA 18:2+O; PlaSMA ID-565	[M-H]-	null	0.01	False	10.4	293.212	C18H30O3	Oxidized fatty acids	HKSDVVJONLXYKL-UHFFFAOYNA-N	O=C(O)CCCCCCCC=CCC=CCC1OC1(CC)	530	False	True	False	Normalized unit: Intensity; Annotation method: MSMS-Public_all-neg-VS19_1	False	False	182	0	0	0.97	-1	-1	-1	-1	-1	0.97	4.5	Plasma_008_neg_022	293.21481:1605 294.21948:268 295.22415:0	null	0	0	0	0	0	0	49	0	57	0	0	0	237	3832	771
183	10.368	293.216	no MS2: FA 18:2+O; PlaSMA ID-565	[M-H]-	null	0.57	False	10.4	293.212	C18H30O3	Oxidized fatty acids	HKSDVVJONLXYKL-UHFFFAOYNA-N	O=C(O)CCCCCCCC=CCC=CCC1OC1(CC)	530	False	True	False	Normalized unit: Intensity; Annotation method: MSMS-Public_all-neg-VS19_1	False	False	183	0	0	1	-1	-1	-1	-1	-1	1	21.36	QC_3-1_neg_011	293.21249:1422 294.21716:274 295.22183:0	null	0	0	0	0	0	0	5096	0	4595	3634	0	128	7475	6444	9971
184	4.13	294.105	no MS2: Prulaurasin	[M-H]-	null	0.06	False	2.421	294.098	C14H17NO6	Cyanogenic glycosides	ZKSZEJFBGODIJW-MXNNCRBYSA-N	N#CC(OC1OC(CO)C(O)C(O)C1O)C=2C=CC=CC2	530	False	True	False	Normalized unit: Intensity; Annotation method: MSMS-Public_all-neg-VS19_1	False	False	184	0	0	0.85	-1	-1	-1	-1	-1	0.85	1000.56	Plasma_005_neg_018	294.10391:843 295.10858:0 296.11325:0	null	0	0	0	0	0	0	0	0	0	0	1671	0	1461	1248	418
185	0.588	294.96	Unknown	[M-H]-	null	0.91	False	null	null	null	null	null	null	999	False	False	False	Normalized unit: Intensity	False	False	185	0	0	null	null	null	null	null	null	null	523.97	Plasma_034_neg_063	294.95981:2009 295.96448:395 296.96914:0	null	0	0	0	0	0	0	1781	2144	2586	1520	1333	1705	1593	1419	1815
186	9.97	295.229	no MS2: 9-hydroxy-10,12-octadecadienoic acid	[M-H]-	null	0.01	False	5.48	295.228	C18H32O3	Lineolic acids and derivatives	NPDSHTNEKLQQIJ-SIGMCMEVSA-N	O=C(O)CCCCCCCC(O)C=CC=CCCCCC	530	False	True	False	Normalized unit: Intensity; Annotation method: MSMS-Public_all-neg-VS19_1	False	False	186	0	0	0.99	-1	-1	-1	-1	-1	0.99	10.28	Plasma_008_neg_022	295.22910:1196 296.23376:263 297.23843:0	null	0	0	0	0	0	0	0	0	0	0	0	0	13	2785	0
187	10.228	295.23	no MS2: 9-hydroxy-10,12-octadecadienoic acid	[M-H]-	null	0.91	False	5.48	295.228	C18H32O3	Lineolic acids and derivatives	NPDSHTNEKLQQIJ-SIGMCMEVSA-N	O=C(O)CCCCCCCC(O)C=CC=CCCCCC	530	False	True	False	Normalized unit: Intensity; Annotation method: MSMS-Public_all-neg-VS19_1	False	False	187	0	0	1	-1	-1	-1	-1	-1	1	4845.32	QC_2-1_neg_010	295.22800:7444 296.23266:1424 297.23733:217	null	0	0	0	0	0	0	15725	5925	3191	10754	2318	9185	11501	91180	19439
188	4.182	295.87	Unknown	[M-H]-	null	0.01	False	null	null	null	null	null	null	999	False	False	False	Normalized unit: Intensity	False	False	188	0	0	null	null	null	null	null	null	null	834.69	Plasma_030_neg_053	295.87009:916 296.87475:0 297.87942:0	null	0	0	0	0	0	0	0	0	0	0	0	0	0	0	0
189	0.638	296.894	Unknown	[M-H]-	null	0.91	False	null	null	null	null	null	null	999	False	False	False	Normalized unit: Intensity	False	False	189	0	0	null	null	null	null	null	null	null	1720.22	Plasma_017_neg_038	296.89349:2068 297.89816:0 298.90283:0	null	0	0	0	0	0	0	1874	1973	1809	2005	2003	2005	1881	1823	1975
190	10.547	297.246	no MS2: FA 18:1+1O; PlaSMA ID-585	[M-H]-	null	0.01	False	10.3	297.244	C18H34O3	Oxidized fatty acids	IMYZYCNQZDBZBQ-UHFFFAOYNA-N	O=C(O)CCCCCCCC1OC1(CCCCCCCC)	530	False	True	False	Normalized unit: Intensity; Annotation method: MSMS-Public_all-neg-VS19_1	False	False	190	0	0	0.98	-1	-1	-1	-1	-1	0.98	21.92	Plasma_008_neg_022	297.24609:1875 298.25076:363 299.25543:0	null	0	0	0	0	0	0	0	19	0	0	34	0	266	4053	0
191	0.638	298.89	Unknown	[M-H]-	null	0.91	False	null	null	null	null	null	null	999	False	False	False	Normalized unit: Intensity	False	False	191	0	0	null	null	null	null	null	null	null	1062.86	Plasma_017_neg_038	298.89050:1344 299.89517:0 300.89984:0	null	0	0	0	0	0	0	1215	1211	1166	1335	1269	1306	1314	1230	1265
192	11.195	299.258	no MS2: (R)-2-hydroxystearic acid	[M-H]-	null	0.01	False	12.4	299.259	C18H36O3	Long-chain fatty acids	KIHBGTRZFAVZRV-QGZVFWFLSA-N	CCCCCCCCCCCCCCCC[C@@H](O)C(=O)O	530	False	True	False	Normalized unit: Intensity; Annotation method: MSMS-Public_all-neg-VS19_1	False	False	192	0	0	0.99	-1	-1	-1	-1	-1	0.99	1025.75	Blind_4_neg_008	299.25809:1048 300.26275:286 301.26742:0	null	818	32	1323	2552	1412	1388	1412	733	1419	1348	1416	1369	1304	1265	1216
193	0.726	301.009	no MS2: FT-thioether; C8H9F7O2S	[M-H]-	null	0.47	False	-1	301.014	C8H9F7O2S	Halogenated fatty acids	MHRKBMQIXRUREA-UHFFFAOYSA-N	O=C(O)CCSCCC(F)(F)C(F)(F)C(F)(F)F	530	False	True	False	Normalized unit: Intensity; Annotation method: MSMS-Public_all-neg-VS19_1	False	False	193	0	0	0.97	-1	-1	-1	-1	-1	0.97	950.74	Plasma_038_neg_068	301.01151:964 302.01617:314 303.02084:0	null	0	0	0	0	0	0	908	0	1067	1390	1995	1155	556	32	706
194	5.014	301.169	Unknown	[M-H]-	null	0.53	False	null	null	null	null	null	null	999	False	False	False	Normalized unit: Intensity	False	False	194	0	0	null	null	null	null	null	null	null	1510.76	Plasma_017_neg_038	301.16879:3330 302.17346:550 303.17813:0	null	0	0	0	0	0	0	56	2766	0	0	0	4185	0	18	0
195	10.753	301.221	no MS2: Abietic acid	[M-H2O-H]-	null	0.01	False	1.008	301.217	C20H30O2	Diterpenoids	RSWGJHLUYNHPMX-ONCXSQPRSA-N	O=C(O)C1(C)CCCC2(C)C3C(C=C(CC3)C(C)C)=CCC12	530	False	True	False	Normalized unit: Intensity; Annotation method: MSMS-Public_all-neg-VS19_1	False	False	195	0	0	0.94	-1	-1	-1	-1	-1	0.94	935.19	Plasma_008_neg_022	301.22089:961 302.22555:196 303.23022:0	null	0	0	0	0	0	0	1149	989	0	0	0	451	339	1987	375
196	0.733	302.013	Unknown	[M-H]-	null	0.03	False	null	null	null	null	null	null	999	False	False	False	Normalized unit: Intensity	False	False	193	1	0	null	null	null	null	null	null	null	907.97	Plasma_040_neg_070	302.01300:1046 303.01767:607 304.02234:0	null	0	0	0	0	0	0	283	240	461	304	581	1108	928	491	748
197	0.727	303.008	Unknown	[M-H]-	null	0.49	False	null	null	null	null	null	null	999	False	False	False	Normalized unit: Intensity	False	False	197	0	0	null	null	null	null	null	null	null	958.11	Plasma_034_neg_063	303.00839:1603 304.01306:0 305.01773:0	null	0	0	0	0	0	0	974	0	1004	1390	1925	1053	326	15	862
198	0.562	304.919	Unknown	[M-H]-	null	0.87	False	null	null	null	null	null	null	999	False	False	False	Normalized unit: Intensity	False	False	198	0	0	null	null	null	null	null	null	null	6631.96	Plasma_025_neg_047	304.91919:8843 305.92386:427 306.92852:336	null	144	198	164	519	289	124	25282	22564	7274	19843	22206	22831	22600	24340	20164
199	0.632	306.925	no MS2: PFSA-pentafluorosulfide; C2HF9O3S2	[M-H]-	null	0.91	False	-1	306.915	C2HF9O3S2	Organosulfonic acids	JPQUOEVJGVZENU-UHFFFAOYSA-N	O=S(=O)(O)C(F)(F)C(F)(F)S(F)(F)(F)(F)F	530	False	True	False	Normalized unit: Intensity; Annotation method: MSMS-Public_all-neg-VS19_1	False	False	199	0	0	0.94	-1	-1	-1	-1	-1	0.94	2662.8	QC_1-1_neg_009	306.91870:2826 307.92337:0 308.92804:0	null	0	0	0	21	0	0	2665	2745	2575	2821	2808	2862	2815	2648	2758
200	0.719	307.116	no MS2: 5,13,15-trihydroxy-9-methyl-10-oxabicyclo[10.4.0]hexadeca-1(12),13,15-triene-3,11-dione	[M-H]-	null	0.18	False	3.562	307.119	C16H20O6	Macrolides and analogues	TXFYYWHRTDECTR-UHFFFAOYSA-N	O=C1OC(C)CCCC(O)CC(=O)CC=2C=C(O)C=C(O)C12	530	False	True	False	Normalized unit: Intensity; Annotation method: MSMS-Public_all-neg-VS19_1	False	False	200	0	0	1	-1	-1	-1	-1	-1	1	828.85	Plasma_029_neg_052	307.11859:935 308.12326:0 309.12793:0	null	0	0	0	0	0	0	2308	1445	1387	886	489	895	2168	1078	2936
201	7.165	307.192	no MS2: 2-(3-(8-hydroxyoctyl)phenoxy)-2-methylpropanoic acid	[M-H2O-H]-	null	0.01	False	-1	307.192	C18H28O4	Phenoxyacetic acid derivatives	NYFMYHQFRBQXEY-UHFFFAOYSA-N	OCCCCCCCCC1=CC=CC(OC(C(O)=O)(C)C)=C1	530	False	True	False	Normalized unit: Intensity; Annotation method: MSMS-Public_all-neg-VS19_1	False	False	201	0	0	1	-1	-1	-1	-1	-1	1	4.37	Plasma_008_neg_022	307.19211:842 308.19678:0 309.20144:0	null	0	0	0	0	0	0	0	0	0	0	0	0	0	1776	0
202	8.452	307.193	no MS2: 2-(3-(8-hydroxyoctyl)phenoxy)-2-methylpropanoic acid	[M-H]-	null	0.01	False	-1	307.192	C18H28O4	Phenoxyacetic acid derivatives	NYFMYHQFRBQXEY-UHFFFAOYSA-N	OCCCCCCCCC1=CC=CC(OC(C(O)=O)(C)C)=C1	530	False	True	False	Normalized unit: Intensity; Annotation method: MSMS-Public_all-neg-VS19_1	False	False	202	0	0	0.99	-1	-1	-1	-1	-1	0.99	8.42	Plasma_008_neg_022	307.19281:1606 308.19748:365 309.20215:1576	null	0	0	0	0	0	0	131	0	16	238	0	0	433	3688	1146
203	7.835	307.193	no MS2: 2-(3-(8-hydroxyoctyl)phenoxy)-2-methylpropanoic acid	[M-H]-	null	0.01	False	-1	307.192	C18H28O4	Phenoxyacetic acid derivatives	NYFMYHQFRBQXEY-UHFFFAOYSA-N	OCCCCCCCCC1=CC=CC(OC(C(O)=O)(C)C)=C1	530	False	True	False	Normalized unit: Intensity; Annotation method: MSMS-Public_all-neg-VS19_1	False	False	203	0	0	0.99	-1	-1	-1	-1	-1	0.99	5.57	Plasma_008_neg_022	307.19281:1113 308.19748:253 309.20215:498	null	0	0	0	0	0	0	0	0	0	16	0	21	189	3175	195
204	9.04	307.193	no MS2: 2-(3-(8-hydroxyoctyl)phenoxy)-2-methylpropanoic acid	[M-H]-	null	0.04	False	-1	307.192	C18H28O4	Phenoxyacetic acid derivatives	NYFMYHQFRBQXEY-UHFFFAOYSA-N	OCCCCCCCCC1=CC=CC(OC(C(O)=O)(C)C)=C1	530	False	True	False	Normalized unit: Intensity; Annotation method: MSMS-Public_all-neg-VS19_1	False	False	204	0	0	0.99	-1	-1	-1	-1	-1	0.99	564.73	Plasma_008_neg_022	307.19321:1326 308.19787:263 309.20254:0	null	0	0	0	0	0	0	0	0	0	0	0	0	206	3020	99
205	9.163	307.196	no MS2: 2-(3-(8-hydroxyoctyl)phenoxy)-2-methylpropanoic acid	[M-H]-	null	0.07	False	-1	307.192	C18H28O4	Phenoxyacetic acid derivatives	NYFMYHQFRBQXEY-UHFFFAOYSA-N	OCCCCCCCCC1=CC=CC(OC(C(O)=O)(C)C)=C1	530	False	True	False	Normalized unit: Intensity; Annotation method: MSMS-Public_all-neg-VS19_1	False	False	205	0	0	0.97	-1	-1	-1	-1	-1	0.97	832.01	Plasma_008_neg_022	307.19379:1543 308.19845:284 309.20312:0	null	0	0	0	0	0	0	0	0	0	0	0	0	18	3342	18
206	0.744	308.103	no MS2: N-ACETYLNEURAMINATE	[M-H]-	null	0.81	False	6.607	308.099	C11H19NO9	N-acylneuraminic acids	SQVRNKJHWKZAKO-LUWBGTNYSA-N	CC(=O)N[C@@H]1[C@H](CC(O[C@H]1[C@@H]([C@@H](CO)O)O)(C(=O)O)O)O	530	False	True	False	Normalized unit: Intensity; Annotation method: MSMS-Public_all-neg-VS19_1	False	False	206	0	0	1	-1	-1	-1	-1	-1	1	1139.18	QC_3-1_neg_011	308.09869:997 309.10336:0 310.10803:0	null	0	0	0	0	0	0	3861	3227	3094	3055	1785	1497	2579	1269	2529
207	0.632	308.922	Unknown	[M-H]-	null	0.9	False	null	null	null	null	null	null	999	False	False	False	Normalized unit: Intensity	False	False	207	0	0	null	null	null	null	null	null	null	696.37	Plasma_036_neg_066	308.92181:1105 309.92648:0 310.93115:0	null	0	0	0	0	0	0	815	814	863	951	893	897	908	848	868
208	8.598	309.171	no MS2: C12-AE1S (TENTATIVE)	[M-H]-	null	0.01	False	-1	309.174	C14H30O5S	Sulfuric acid monoesters	QTDIEDOANJISNP-UHFFFAOYSA-N	O=S(O)(=O)OCCOCCCCCCCCCCCC	530	False	True	False	Normalized unit: Intensity; Annotation method: MSMS-Public_all-neg-VS19_1	False	False	208	0	0	0.94	-1	-1	-1	-1	-1	0.94	16.7	Blind_4_neg_008	309.17059:1068 310.17526:0 311.17993:0	null	1253	664	576	2509	1336	1256	1199	1191	1242	1263	1169	1211	1184	993	1200
209	10.613	309.173	no MS2: C12-AE1S (TENTATIVE)	[M-H]-	null	0.96	False	-1	309.174	C14H30O5S	Sulfuric acid monoesters	QTDIEDOANJISNP-UHFFFAOYSA-N	O=S(O)(=O)OCCOCCCCCCCCCCCC	530	False	True	False	Normalized unit: Intensity; Annotation method: MSMS-Public_all-neg-VS19_1	False	False	209	0	0	1	-1	-1	-1	-1	-1	1	154.38	QC_4-1_neg_012	309.17429:1265 310.17895:175 311.18362:0	null	4119	2241	3873	7391	4030	2480	4716	4507	3769	3973	4182	4510	4039	4020	3955
210	8.457	309.208	no MS2: FA 18:4+2O; PlaSMA ID-636	[M-H]-	null	0.1	False	8.99	309.207	C18H30O4	Oxidized fatty acids	FLJRXICXLUZYBE-UHFFFAOYNA-N	O=C(O)CCCCCCCC=CCC(OO)C=CC=CCC	530	False	True	False	Normalized unit: Intensity; Annotation method: MSMS-Public_all-neg-VS19_1	False	False	210	0	0	1	-1	-1	-1	-1	-1	1	17.63	Plasma_008_neg_022	309.20819:5033 310.21286:1086 311.21753:252	null	0	0	0	0	0	0	109	0	308	127	22	0	1325	13457	1670
211	8.055	309.208	no MS2: FA 18:4+2O; PlaSMA ID-636	[M-H]-	null	0.06	False	8.99	309.207	C18H30O4	Oxidized fatty acids	FLJRXICXLUZYBE-UHFFFAOYNA-N	O=C(O)CCCCCCCC=CCC(OO)C=CC=CCC	530	False	True	False	Normalized unit: Intensity; Annotation method: MSMS-Public_all-neg-VS19_1	False	False	211	0	0	1	-1	-1	-1	-1	-1	1	19.4	Plasma_004_neg_017	309.20740:1458 310.21207:224 311.21673:0	null	0	0	0	0	0	0	2086	730	623	3742	50	334	1861	12105	3575
212	8.349	309.209	no MS2: FA 18:4+2O; PlaSMA ID-636	[M-H]-	null	0.09	False	8.99	309.207	C18H30O4	Oxidized fatty acids	FLJRXICXLUZYBE-UHFFFAOYNA-N	O=C(O)CCCCCCCC=CCC(OO)C=CC=CCC	530	False	True	False	Normalized unit: Intensity; Annotation method: MSMS-Public_all-neg-VS19_1	False	False	212	0	0	0.99	-1	-1	-1	-1	-1	0.99	17.2	Plasma_012_neg_027	309.20871:1000 310.21338:0 311.21805:0	null	0	0	0	0	0	0	101	0	569	85	0	0	2485	19434	2806
213	9.492	309.213	no MS2: FA 18:4+2O; PlaSMA ID-636	[M-H]-	null	0.01	False	8.99	309.207	C18H30O4	Oxidized fatty acids	FLJRXICXLUZYBE-UHFFFAOYNA-N	O=C(O)CCCCCCCC=CCC(OO)C=CC=CCC	530	False	True	False	Normalized unit: Intensity; Annotation method: MSMS-Public_all-neg-VS19_1	False	False	213	0	0	0.86	-1	-1	-1	-1	-1	0.86	15.87	Plasma_040_neg_070	309.21289:1660 310.21756:350 311.22223:0	null	0	0	0	0	0	0	13	29	11	0	144	0	125	30	0
214	0.588	310.932	no MS2: PFSA-unsaturated; C5HF9O3S	[M-H]-	null	0.91	False	-1	310.943	C5HF9O3S	Organosulfonic acids	MABDDTFQDXNBKB-UHFFFAOYSA-N	O=S(=O)(O)C(F)(F)C(F)(F)C(F)(F)C(F)=C(F)F	530	False	True	False	Normalized unit: Intensity; Annotation method: MSMS-Public_all-neg-VS19_1	False	False	214	0	0	0.92	-1	-1	-1	-1	-1	0.92	1922.72	QC_2-4_neg_081	310.93890:1843 311.94357:0 312.94824:0	null	0	0	0	0	0	0	3199	3049	2689	2678	2744	2906	2837	2966	2585
215	11.23	311.202	no MS2: dl-Norgestrel	[M-H]-	null	1	False	19.923	311.202	C21H28O2	Estrogens and derivatives	WWYNJERNGUHSAO-CULCCENASA-N	CC[C@]12CC[C@H]3[C@@H](CCC4=CC(=O)CC[C@H]34)[C@@H]1CCC2(O)C#C	530	False	True	False	Normalized unit: Intensity; Annotation method: MSMS-Public_all-neg-VS19_1	False	False	215	0	0	1	-1	-1	-1	-1	-1	1	100.63	Blind_4_neg_008	311.20169:1961 312.20636:470 313.21103:0	null	3109	2894	2880	5004	3080	3025	2760	2907	2963	3078	3022	3054	2765	2392	2662
216	7.867	311.224	no MS2: (9Z,12E)-15,16-dihydroxyoctadeca-9,12-dienoic acid	[M-H]-	null	0.01	False	4.492	311.223	C18H32O4	Lineolic acids and derivatives	LKLLJYJTYPVCID-JVVXYUKTSA-N	O=C(O)CCCCCCCC=CCC=CCC(O)C(O)CC	530	False	True	False	Normalized unit: Intensity; Annotation method: MSMS-Public_all-neg-VS19_1	False	False	216	0	0	1	-1	-1	-1	-1	-1	1	43.81	Plasma_008_neg_022	311.22351:4359 312.22818:835 313.23285:0	null	0	0	0	0	0	0	13	0	15	21	0	0	289	14381	1279
217	8.018	311.224	no MS2: (9Z,12E)-15,16-dihydroxyoctadeca-9,12-dienoic acid	[M-H]-	null	0.01	False	4.492	311.223	C18H32O4	Lineolic acids and derivatives	LKLLJYJTYPVCID-JVVXYUKTSA-N	O=C(O)CCCCCCCC=CCC=CCC(O)C(O)CC	530	False	True	False	Normalized unit: Intensity; Annotation method: MSMS-Public_all-neg-VS19_1	False	False	217	0	0	1	-1	-1	-1	-1	-1	1	26.24	Plasma_008_neg_022	311.22369:5104 312.22836:1135 313.23303:235	null	0	0	0	0	0	0	41	0	49	37	0	0	620	13911	2289
218	8.983	311.224	no MS2: (9Z,12E)-15,16-dihydroxyoctadeca-9,12-dienoic acid	[M-H]-	null	0.01	False	4.492	311.223	C18H32O4	Lineolic acids and derivatives	LKLLJYJTYPVCID-JVVXYUKTSA-N	O=C(O)CCCCCCCC=CCC=CCC(O)C(O)CC	530	False	True	False	Normalized unit: Intensity; Annotation method: MSMS-Public_all-neg-VS19_1	False	False	218	0	0	0.99	-1	-1	-1	-1	-1	0.99	15.46	Plasma_008_neg_022	311.22379:1528 312.22845:373 313.23312:353	null	0	0	0	0	0	0	14	0	189	18	65	752	575	4693	381
219	8.857	311.224	no MS2: (9Z,12E)-15,16-dihydroxyoctadeca-9,12-dienoic acid	[M-H]-	null	0.01	False	4.492	311.223	C18H32O4	Lineolic acids and derivatives	LKLLJYJTYPVCID-JVVXYUKTSA-N	O=C(O)CCCCCCCC=CCC=CCC(O)C(O)CC	530	False	True	False	Normalized unit: Intensity; Annotation method: MSMS-Public_all-neg-VS19_1	False	False	219	0	0	0.99	-1	-1	-1	-1	-1	0.99	25.66	Plasma_008_neg_022	311.22391:3024 312.22858:559 313.23324:0	null	0	0	0	0	0	0	45	0	187	21	0	0	1930	9665	571
220	9.1	311.224	no MS2: (9Z,12E)-15,16-dihydroxyoctadeca-9,12-dienoic acid	[M-H]-	null	0.12	False	4.492	311.223	C18H32O4	Lineolic acids and derivatives	LKLLJYJTYPVCID-JVVXYUKTSA-N	O=C(O)CCCCCCCC=CCC=CCC(O)C(O)CC	530	False	True	False	Normalized unit: Intensity; Annotation method: MSMS-Public_all-neg-VS19_1	False	False	220	0	0	0.99	-1	-1	-1	-1	-1	0.99	35.72	Plasma_008_neg_022	311.22421:8819 312.22888:1582 313.23355:565	null	0	0	0	0	0	0	281	149	399	473	230	1349	2243	22054	4329
221	9.254	311.224	no MS2: FA 18:2+2O; PlaSMA ID-650	[M-H]-	null	0.76	False	8.54	311.223	C18H32O4	Oxidized fatty acids	JGUNZIWGNMQSBM-UHFFFAOYNA-N	O=C(O)CCCCCCCC(OO)C=CC=CCCCCC	530	False	True	False	Normalized unit: Intensity; Annotation method: MSMS-Public_all-neg-VS19_1	False	False	221	0	0	1	-1	-1	-1	-1	-1	1	20.87	QC_4-1_neg_012	311.22269:1903 312.22735:312 313.23202:0	null	0	0	0	0	0	0	3114	1724	3359	2809	1905	2601	6310	38673	5167
222	8.652	311.224	no MS2: (9Z,12E)-15,16-dihydroxyoctadeca-9,12-dienoic acid	[M-H]-	null	0.01	False	4.492	311.223	C18H32O4	Lineolic acids and derivatives	LKLLJYJTYPVCID-JVVXYUKTSA-N	O=C(O)CCCCCCCC=CCC=CCC(O)C(O)CC	530	False	True	False	Normalized unit: Intensity; Annotation method: MSMS-Public_all-neg-VS19_1	False	False	222	0	0	0.99	-1	-1	-1	-1	-1	0.99	37.55	Plasma_008_neg_022	311.22440:4404 312.22906:832 313.23373:372	null	0	0	0	0	0	0	193	172	1138	294	50	258	2129	17400	2042
223	10.37	311.226	no MS2: (9Z,12E)-15,16-dihydroxyoctadeca-9,12-dienoic acid	[M-H]-	null	0.16	False	4.492	311.223	C18H32O4	Lineolic acids and derivatives	LKLLJYJTYPVCID-JVVXYUKTSA-N	O=C(O)CCCCCCCC=CCC=CCC(O)C(O)CC	530	False	True	False	Normalized unit: Intensity; Annotation method: MSMS-Public_all-neg-VS19_1	False	False	223	0	0	0.99	-1	-1	-1	-1	-1	0.99	12.12	Plasma_009_neg_023	311.22409:1309 312.22876:303 313.23343:0	null	0	0	0	0	0	0	1525	0	804	1029	0	0	2332	1852	3036
224	10.026	311.229	no MS2: FA 18:2+2O; PlaSMA ID-648	[M-H]-	null	0.38	False	7.32	311.222	C18H32O4	Oxidized fatty acids	QRHSEDZBZMZPOA-UHFFFAOYNA-N	O=C(O)CCCCCCCC(O)C(O)CC=CCC=CCC	530	False	True	False	Normalized unit: Intensity; Annotation method: MSMS-Public_all-neg-VS19_1	False	False	224	0	0	1	-1	-1	-1	-1	-1	1	17.66	QC_1-1_neg_009	311.22220:1529 312.22687:262 313.23153:0	null	0	0	0	0	0	0	3503	2045	1426	54	1521	636	3005	1886	1263
225	8.445	313.24	no MS2: Octadecanedioic acid	[M-H]-	null	0.03	False	1.14	313.238	C18H34O4	Long-chain fatty acids	BNJOQKFENDDGSC-UHFFFAOYSA-N	O=C(O)CCCCCCCCCCCCCCCCC(=O)O	530	False	True	False	Normalized unit: Intensity; Annotation method: MSMS-Public_all-neg-VS19_1	False	False	225	0	0	0.99	-1	-1	-1	-1	-1	0.99	497.63	Plasma_008_neg_022	313.23999:1631 314.24466:294 315.24933:0	null	0	0	0	0	0	0	0	0	0	0	1297	0	368	5326	0
226	10.633	313.243	no MS2: Octadecanedioic acid	[M-H]-	null	0.01	False	1.14	313.238	C18H34O4	Long-chain fatty acids	BNJOQKFENDDGSC-UHFFFAOYSA-N	O=C(O)CCCCCCCCCCCCCCCCC(=O)O	530	False	True	False	Normalized unit: Intensity; Annotation method: MSMS-Public_all-neg-VS19_1	False	False	226	0	0	0.89	-1	-1	-1	-1	-1	0.89	1027.06	Plasma_039_neg_069	313.24329:1040 314.24795:0 315.25262:0	null	0	0	0	0	0	0	183	289	0	0	22	299	294	858	0
227	8.093	314.987	Unknown	[M-H]-	null	0.01	False	null	null	null	null	null	null	999	False	False	False	Normalized unit: Intensity	False	False	227	0	0	null	null	null	null	null	null	null	1045.38	Blind_4_neg_008	314.98730:1152 315.99197:0 316.99664:0	null	1819	16	88	3334	1993	1830	1768	1827	1585	914	1885	1497	1736	909	1968
228	0.749	315.042	no MS2: Isorhamnetin; PlaSMA ID-664	[M-H]-	null	0.81	False	6.14	315.051	C16H12O7	Flavonol O-glycosides	IZQSVPBOUDKVDZ-UHFFFAOYSA-N	O=C1C(O)=C(OC2=CC(O)=CC(O)=C12)C=3C=CC(O)=C(OC)C=3	530	False	True	False	Normalized unit: Intensity; Annotation method: MSMS-Public_all-neg-VS19_1	False	False	228	0	0	0.97	-1	-1	-1	-1	-1	0.97	1161.35	Plasma_040_neg_070	315.04849:1314 316.05316:0 317.05783:0	null	0	0	0	0	0	0	3590	7371	4538	3041	3831	3624	2833	2596	3562
229	5.324	315.128	no MS2: [1-hydroxy-1-(4-methoxyphenyl)propan-2-yl] 4-methoxybenzoate	[M-H]-	null	0.1	False	-1	315.124	C18H20O5	P-methoxybenzoic acids and derivatives	MHJLKHNHGMUAPQ-UHFFFAOYSA-N	O=C(OC(C)C(O)C1=CC=C(OC)C=C1)C2=CC=C(OC)C=C2	530	False	True	False	Normalized unit: Intensity; Annotation method: MSMS-Public_all-neg-VS19_1	False	False	229	0	0	0.99	-1	-1	-1	-1	-1	0.99	1011.51	Plasma_006_neg_020	315.12521:927 316.12988:191 317.13455:0	null	0	0	0	0	0	0	169	754	19	0	0	1680	0	79	0
230	9.653	315.255	Unknown	[M-H]-	null	0.01	False	null	null	null	null	null	null	999	False	False	False	Normalized unit: Intensity	False	False	230	0	0	null	null	null	null	null	null	null	835.25	Plasma_005_neg_018	315.25531:857 316.25998:205 317.26465:0	null	0	0	0	227	0	0	221	31	108	86	1831	35	376	1631	75
231	9.427	315.257	Unknown	[M-H]-	null	0.01	False	null	null	null	null	null	null	999	False	False	False	Normalized unit: Intensity	False	False	231	0	0	null	null	null	null	null	null	null	5.75	Plasma_008_neg_022	315.25690:856 316.26156:0 317.26623:0	null	764	320	745	1698	755	494	908	850	618	887	1701	936	1075	1994	897
232	0.619	316.948	Unknown	[M-H]-	null	0.91	False	null	null	null	null	null	null	999	False	False	False	Normalized unit: Intensity	False	False	232	0	0	null	null	null	null	null	null	null	9009.49	QC_3-1_neg_011	316.94830:9755 317.95297:548 318.95764:223	null	733	710	345	1081	768	788	18817	18510	17986	21018	20796	20149	19998	19349	20105
233	0.735	319.055	no MS2: Hydroxyhaemoventosine	[M-H]-	null	0.28	False	-1	319.046	C15H12O8	Isochromanequinones	GCBHOICQSSPFDL-DPVSGNNYSA-N	OC1=C2C(C(O)[C@H](C)OC2=O)=C(O)C3=C1C(C=C(OC)C3=O)=O	530	False	True	False	Normalized unit: Intensity; Annotation method: MSMS-Public_all-neg-VS19_1	False	False	233	0	0	0.8	-1	-1	-1	-1	-1	0.8	1064.02	Plasma_016_neg_037	319.05261:1113 320.05728:0 321.06195:0	null	0	0	0	0	0	0	1882	0	1334	989	1885	860	1500	72	1751
234	5.907	319.171	Unknown	[M-H]-	null	0.01	False	null	null	null	null	null	null	999	False	False	False	Normalized unit: Intensity	False	False	234	0	0	null	null	null	null	null	null	null	1162.94	Plasma_030_neg_053	319.17130:1193 320.17596:228 321.18063:0	null	0	0	0	0	0	0	0	0	0	0	174	0	0	0	0
235	10.387	319.23	no MS2: 5-[(8aS)-2,5,5,8a-tetramethyl-3-oxo-4a,6,7,8-tetrahydro-4H-naphthalen-1-yl]-3-methylpentanoic acid	[M-H]-	null	0.06	False	5.176	319.228	C20H32O3	Diterpenoids	BARZJLALPXZLMN-RJGDCVCESA-N	O=C(O)CC(C)CCC1=C(C(=O)CC2C1(C)CCCC2(C)C)C	530	False	True	False	Normalized unit: Intensity; Annotation method: MSMS-Public_all-neg-VS19_1	False	False	235	0	0	1	-1	-1	-1	-1	-1	1	1682.53	Plasma_001_neg_014	319.22800:1217 320.23266:251 321.23733:0	null	0	0	0	0	0	0	2468	1511	30	520	302	861	1337	8671	2087
236	10.611	319.23	no MS2: 5-[(8aS)-2,5,5,8a-tetramethyl-3-oxo-4a,6,7,8-tetrahydro-4H-naphthalen-1-yl]-3-methylpentanoic acid	[M-H]-	null	0.1	False	5.176	319.228	C20H32O3	Diterpenoids	BARZJLALPXZLMN-RJGDCVCESA-N	O=C(O)CC(C)CCC1=C(C(=O)CC2C1(C)CCCC2(C)C)C	530	False	True	False	Normalized unit: Intensity; Annotation method: MSMS-Public_all-neg-VS19_1	False	False	236	0	0	1	-1	-1	-1	-1	-1	1	1401.71	Plasma_001_neg_014	319.22879:1354 320.23346:262 321.23813:0	null	0	0	0	0	0	0	3680	1239	19	802	44	1247	2066	13647	3497
237	10.744	319.231	no MS2: 5-[(8aS)-2,5,5,8a-tetramethyl-3-oxo-4a,6,7,8-tetrahydro-4H-naphthalen-1-yl]-3-methylpentanoic acid	[M-H]-	null	0.82	False	5.176	319.228	C20H32O3	Diterpenoids	BARZJLALPXZLMN-RJGDCVCESA-N	O=C(O)CC(C)CCC1=C(C(=O)CC2C1(C)CCCC2(C)C)C	530	False	True	False	Normalized unit: Intensity; Annotation method: MSMS-Public_all-neg-VS19_1	False	False	237	0	0	1	-1	-1	-1	-1	-1	1	2722.91	QC_1-1_neg_009	319.22821:3311 320.23288:856 321.23755:0	null	0	0	0	0	0	0	9848	9391	394	2479	700	5765	4504	16805	5130
238	10.5	319.231	no MS2: 5-[(8aS)-2,5,5,8a-tetramethyl-3-oxo-4a,6,7,8-tetrahydro-4H-naphthalen-1-yl]-3-methylpentanoic acid	[M-H]-	null	0.31	False	5.176	319.228	C20H32O3	Diterpenoids	BARZJLALPXZLMN-RJGDCVCESA-N	O=C(O)CC(C)CCC1=C(C(=O)CC2C1(C)CCCC2(C)C)C	530	False	True	False	Normalized unit: Intensity; Annotation method: MSMS-Public_all-neg-VS19_1	False	False	238	0	0	1	-1	-1	-1	-1	-1	1	1091.81	QC_1-1_neg_009	319.22821:854 320.23288:232 321.23755:0	null	0	0	0	0	0	0	2806	1530	30	1076	46	1000	1730	10969	3213
239	10.777	321.246	no MS2: (1R,4aS,5R,8aS)-5-(5-hydroxy-3-methylpentyl)-1,4a-dimethyl-6-methylidene-3,4,5,7,8,8a-hexahydro-2H-naphthalene-1-carboxylic acid	[M-H]-	null	0.01	False	-1	321.244	C20H34O3	Diterpenoids	NSRKLZRKJJQJLD-KXBJDGJWSA-N	O=C(O)C1(C)CCCC2(C)C(C(=C)CCC12)CCC(C)CCO	530	False	True	False	Normalized unit: Intensity; Annotation method: MSMS-Public_all-neg-VS19_1	False	False	239	0	0	0.97	-1	-1	-1	-1	-1	0.97	1473.63	Plasma_008_neg_022	321.24579:1798 322.25046:408 323.25512:0	null	0	0	0	0	0	0	343	111	0	0	0	57	71	4883	649
240	3.987	323.914	Unknown	[M-H]-	null	0.01	False	null	null	null	null	null	null	999	False	False	False	Normalized unit: Intensity	False	False	240	0	0	null	null	null	null	null	null	null	863.25	Plasma_044_neg_075	323.91449:961 324.91916:0 325.92383:0	null	0	0	0	0	0	0	1304	1371	1181	861	1294	1062	947	1265	917
241	7.163	325.203	no MS2: FA 18:3+3O	[M-H]-	null	0.03	False	6.58	325.202	C18H30O5	Lineolic acids and derivatives	PLHUEKVESBJIRC-UHFFFAOYSA-N	O=C(O)CCCCCCCC(=O)C=CC(O)C(O)CC=CCC	530	False	True	False	Normalized unit: Intensity; Annotation method: MSMS-Public_all-neg-VS19_1	False	False	241	0	0	1	-1	-1	-1	-1	-1	1	29.23	Plasma_008_neg_022	325.20300:2555 326.20767:597 327.21234:1757	null	0	0	0	0	0	0	281	0	264	286	0	0	1310	6913	3518
242	7.982	325.204	no MS2: FA 18:3+3O	[M-H]-	null	0.01	False	6.58	325.202	C18H30O5	Lineolic acids and derivatives	PLHUEKVESBJIRC-UHFFFAOYSA-N	O=C(O)CCCCCCCC(=O)C=CC(O)C(O)CC=CCC	530	False	True	False	Normalized unit: Intensity; Annotation method: MSMS-Public_all-neg-VS19_1	False	False	242	0	0	0.99	-1	-1	-1	-1	-1	0.99	20.61	Plasma_008_neg_022	325.20370:1489 326.20837:323 327.21304:400	null	0	0	0	0	0	0	0	0	19	20	0	0	456	2380	374
243	11.59	325.217	no MS2: Aphyllic Acid	[M+CH3COO]-	null	0.01	False	8	325.213	C15H26N2O2	Delta amino acids and derivatives	VFENFLGNSRQELY-UHFFFAOYSA-N	O=C(O)C1CC(CN2CCCCC21)C3NCCCC3	530	False	True	False	Normalized unit: Intensity; Annotation method: MSMS-Public_all-neg-VS19_1	False	False	243	0	0	0.93	-1	-1	-1	-1	-1	0.93	1042.5	Blind_4_neg_008	325.21710:1166 326.22177:225 327.22644:0	null	1176	651	1132	2406	1267	1310	1315	1380	1354	1390	1309	1279	1228	1078	1188
244	0.667	326.765	no MS2: 2,4,6-Tribromphenol	[M-H]-	null	0.9	False	11.937	326.766	C6H3Br3O	P-bromophenols	BSWWXRFVMJHFBN-UHFFFAOYSA-N	OC1=C(Br)C=C(Br)C=C1Br	530	False	True	False	Normalized unit: Intensity; Annotation method: MSMS-Public_all-neg-VS19_1	False	False	244	0	0	1	-1	-1	-1	-1	-1	1	944.84	Plasma_034_neg_063	326.76611:1017 327.77078:0 328.77545:0	null	0	0	0	0	0	0	1065	1171	1027	1162	1103	1092	998	916	1005
245	7.365	327.219	no MS2: (10E,15Z)-9,12,13-trihydroxyoctadeca-10,15-dienoic acid	[M-H]-	null	0.01	False	3.541	327.218	C18H32O5	Lineolic acids and derivatives	MKYUCBXUUSZMQB-MKZMYESJSA-N	O=C(O)CCCCCCCC(O)C=CC(O)C(O)CC=CCC	530	False	True	False	Normalized unit: Intensity; Annotation method: MSMS-Public_all-neg-VS19_1	False	False	245	0	0	1	-1	-1	-1	-1	-1	1	51.66	Plasma_008_neg_022	327.21869:4081 328.22336:767 329.22802:753	null	0	0	0	0	0	0	191	0	426	105	0	0	1627	12436	1243
246	7.188	327.219	no MS2: (10E,15Z)-9,12,13-trihydroxyoctadeca-10,15-dienoic acid	[M-H]-	null	0.01	False	3.541	327.218	C18H32O5	Lineolic acids and derivatives	MKYUCBXUUSZMQB-MKZMYESJSA-N	O=C(O)CCCCCCCC(O)C=CC(O)C(O)CC=CCC	530	False	True	False	Normalized unit: Intensity; Annotation method: MSMS-Public_all-neg-VS19_1	False	False	246	0	0	0.99	-1	-1	-1	-1	-1	0.99	40.16	Plasma_008_neg_022	327.21881:3216 328.22348:664 329.22815:579	null	0	0	0	0	0	0	33	0	26	220	0	0	1163	9287	688
247	7.589	327.219	no MS2: (10E,15Z)-9,12,13-trihydroxyoctadeca-10,15-dienoic acid	[M-H]-	null	0.22	False	3.541	327.218	C18H32O5	Lineolic acids and derivatives	MKYUCBXUUSZMQB-MKZMYESJSA-N	O=C(O)CCCCCCCC(O)C=CC(O)C(O)CC=CCC	530	False	True	False	Normalized unit: Intensity; Annotation method: MSMS-Public_all-neg-VS19_1	False	False	247	0	0	0.99	-1	-1	-1	-1	-1	0.99	68.27	Plasma_008_neg_022	327.21890:2998 328.22357:662 329.22824:880	null	0	0	0	0	0	0	1144	103	19	719	35	47	3717	11599	3073
248	0.667	328.76	Unknown	[M-H]-	null	0.25	False	null	null	null	null	null	null	999	False	False	False	Normalized unit: Intensity	False	False	248	0	0	null	null	null	null	null	null	null	835.88	Plasma_016_neg_037	328.75980:1134 329.76446:0 330.76913:0	null	0	0	0	0	0	0	864	929	855	851	978	990	868	716	814
249	5.512	329.105	no MS2: Pesticide4_Halofenozide_C18H19ClN2O2_N'-Benzoyl-4-chloro-N'-(2-methyl-2-propanyl)benzohydrazide	[M-H]-	null	0.43	False	-1	329.106	C18H19ClN2O2	4-halobenzoic acids and derivatives	CNKHSLKYRMDDNQ-UHFFFAOYSA-N	CC(C)(C)N(C(=O)C1=CC=CC=C1)NC(=O)C2=CC=C(C=C2)Cl	530	False	True	False	Normalized unit: Intensity; Annotation method: MSMS-Public_all-neg-VS19_1	False	False	249	0	0	1	-1	-1	-1	-1	-1	1	641.29	Plasma_012_neg_027	329.10629:1177 330.11096:210 331.11563:0	null	0	0	0	0	0	0	309	1351	0	0	0	5067	0	0	0
250	5.359	329.106	no MS2: Pesticide4_Halofenozide_C18H19ClN2O2_N'-Benzoyl-4-chloro-N'-(2-methyl-2-propanyl)benzohydrazide	[M-H]-	null	0.59	False	-1	329.106	C18H19ClN2O2	4-halobenzoic acids and derivatives	CNKHSLKYRMDDNQ-UHFFFAOYSA-N	CC(C)(C)N(C(=O)C1=CC=CC=C1)NC(=O)C2=CC=C(C=C2)Cl	530	False	True	False	Normalized unit: Intensity; Annotation method: MSMS-Public_all-neg-VS19_1	False	False	250	0	0	1	-1	-1	-1	-1	-1	1	1009.84	QC_1-2_neg_032	329.10620:1824 330.11087:356 331.11554:0	null	0	0	0	0	0	0	1422	2296	0	63	0	8176	0	734	0
251	7.902	329.234	no MS2: (Z)-5,8,11-trihydroxyoctadec-9-enoic acid	[M-H]-	null	0.01	False	3.77	329.233	C18H34O5	Long-chain fatty acids	FITAKYVPWCVTII-QBFSEMIESA-N	O=C(O)CCCC(O)CCC(O)C=CC(O)CCCCCCC	530	False	True	False	Normalized unit: Intensity; Annotation method: MSMS-Public_all-neg-VS19_1	False	False	251	0	0	1	-1	-1	-1	-1	-1	1	10.59	Plasma_008_neg_022	329.23431:2047 330.23898:433 331.24365:0	null	0	0	0	0	0	0	51	0	17	385	0	16	990	5286	183
252	7.029	329.235	no MS2: (Z)-5,8,11-trihydroxyoctadec-9-enoic acid	[M-H]-	null	0.9	False	3.77	329.233	C18H34O5	Long-chain fatty acids	FITAKYVPWCVTII-QBFSEMIESA-N	O=C(O)CCCC(O)CCC(O)C=CC(O)CCCCCCC	530	False	True	False	Normalized unit: Intensity; Annotation method: MSMS-Public_all-neg-VS19_1	False	False	252	0	0	1	-1	-1	-1	-1	-1	1	11948.8	QC_1-1_neg_009	329.23331:18037 330.23797:3691 331.24264:544	null	0	0	0	0	0	0	34461	18391	26014	33611	14689	22538	74172	372071	70512
253	7.488	329.235	no MS2: (Z)-5,8,11-trihydroxyoctadec-9-enoic acid	[M-H]-	null	0.04	False	3.77	329.233	C18H34O5	Long-chain fatty acids	FITAKYVPWCVTII-QBFSEMIESA-N	O=C(O)CCCC(O)CCC(O)C=CC(O)CCCCCCC	530	False	True	False	Normalized unit: Intensity; Annotation method: MSMS-Public_all-neg-VS19_1	False	False	253	0	0	0.99	-1	-1	-1	-1	-1	0.99	8.01	Plasma_008_neg_022	329.23471:3354 330.23938:466 331.24405:0	null	0	0	0	0	0	0	690	270	99	913	180	20	2091	11429	690
254	7.68	329.235	no MS2: (Z)-5,8,11-trihydroxyoctadec-9-enoic acid	[M-H]-	null	0.01	False	3.77	329.233	C18H34O5	Long-chain fatty acids	FITAKYVPWCVTII-QBFSEMIESA-N	O=C(O)CCCC(O)CCC(O)C=CC(O)CCCCCCC	530	False	True	False	Normalized unit: Intensity; Annotation method: MSMS-Public_all-neg-VS19_1	False	False	254	0	0	0.98	-1	-1	-1	-1	-1	0.98	9.99	Plasma_008_neg_022	329.23511:2197 330.23978:377 331.24444:0	null	0	0	0	0	0	0	129	158	16	382	34	0	1851	6585	976
255	7.014	329.349	Unknown	[M-H]-	null	0.04	False	null	null	null	null	null	null	999	False	False	False	Normalized unit: Intensity	False	False	255	0	0	null	null	null	null	null	null	null	1308.85	Plasma_044_neg_075	329.34949:1893 330.35416:261 331.35882:0	null	0	0	0	0	0	0	0	0	0	0	0	0	187	546	36
256	7.04	329.368	Unknown	[M-H]-	null	0.01	False	null	null	null	null	null	null	999	False	False	False	Normalized unit: Intensity	False	False	256	0	0	null	null	null	null	null	null	null	1624.25	Plasma_008_neg_022	329.36771:1658 330.37237:245 331.37704:0	null	0	0	0	0	0	0	0	0	0	0	0	0	220	4577	156
257	0.62	332.924	no MS2: PFAP-diPAP; C4HF10O4P	[M-H]-	null	0.91	False	-1	332.938	C4HF10O4P	Dialkyl phosphates	HJLWRXZHQHRZCH-UHFFFAOYSA-N	O=P(O)(OC(F)(F)F)OC(F)(F)C(F)(F)C(F)(F)F	530	False	True	False	Normalized unit: Intensity; Annotation method: MSMS-Public_all-neg-VS19_1	False	False	257	0	0	0.73	-1	-1	-1	-1	-1	0.73	1363.17	Plasma_045_neg_076	332.93011:1403 333.93478:0 334.93945:0	null	165	122	81	494	205	267	2553	2442	2822	2677	2729	2681	2659	3170	2492
258	8.875	333.209	no MS2: NCGC00380721-01_C20H30O4_2-Hydroxy-4,5',8a'-trimethyl-1'-oxo-4-vinyloctahydro-1'H-spiro[cyclopentane-1,2'-naphthalene]-5'-carboxylic acid	[M-H]-	null	0.01	False	-1	333.207	C20H30O4	Cyclic alcohols and derivatives	JSXYBZIRJXMIMK-UHFFFAOYSA-N	CC1(CC(O)C2(CCC3C(C)(CCCC3(C)C2=O)C(O)=O)C1)C=C	530	False	True	False	Normalized unit: Intensity; Annotation method: MSMS-Public_all-neg-VS19_1	False	False	258	0	0	0.99	-1	-1	-1	-1	-1	0.99	22	Plasma_008_neg_022	333.20859:2074 334.21326:357 335.21792:0	null	0	0	0	0	0	0	401	316	69	147	0	58	401	5384	1554
259	9.403	333.209	no MS2: NCGC00380721-01_C20H30O4_2-Hydroxy-4,5',8a'-trimethyl-1'-oxo-4-vinyloctahydro-1'H-spiro[cyclopentane-1,2'-naphthalene]-5'-carboxylic acid	[M-H]-	null	0.06	False	-1	333.207	C20H30O4	Cyclic alcohols and derivatives	JSXYBZIRJXMIMK-UHFFFAOYSA-N	CC1(CC(O)C2(CCC3C(C)(CCCC3(C)C2=O)C(O)=O)C1)C=C	530	False	True	False	Normalized unit: Intensity; Annotation method: MSMS-Public_all-neg-VS19_1	False	False	259	0	0	0.99	-1	-1	-1	-1	-1	0.99	304.65	Plasma_009_neg_023	333.20850:1038 334.21316:284 335.21783:0	null	0	0	0	0	0	0	784	220	158	425	0	126	717	5004	2398
260	8.333	333.209	no MS2: NCGC00380721-01_C20H30O4_2-Hydroxy-4,5',8a'-trimethyl-1'-oxo-4-vinyloctahydro-1'H-spiro[cyclopentane-1,2'-naphthalene]-5'-carboxylic acid	[M-H]-	null	0.01	False	-1	333.207	C20H30O4	Cyclic alcohols and derivatives	JSXYBZIRJXMIMK-UHFFFAOYSA-N	CC1(CC(O)C2(CCC3C(C)(CCCC3(C)C2=O)C(O)=O)C1)C=C	530	False	True	False	Normalized unit: Intensity; Annotation method: MSMS-Public_all-neg-VS19_1	False	False	260	0	0	0.98	-1	-1	-1	-1	-1	0.98	12.34	Plasma_008_neg_022	333.20920:1281 334.21387:242 335.21853:0	null	0	0	0	0	0	0	52	49	0	55	0	0	38	2861	298
261	8.418	335.224	no MS2: (2E,6E,10Z)-12-hydroxy-10-(hydroxymethyl)-6-methyl-2-(4-methylpent-3-enyl)dodeca-2,6,10-trienoic acid	[M-H]-	null	0.01	False	4.309	335.223	C20H32O4	Acyclic diterpenoids	GWVCYAYKRPLWGK-AAMZJHKISA-N	O=C(O)C(=CCCC(=CCCC(=CCO)CO)C)CCC=C(C)C	530	False	True	False	Normalized unit: Intensity; Annotation method: MSMS-Public_all-neg-VS19_1	False	False	261	0	0	0.99	-1	-1	-1	-1	-1	0.99	10.24	Plasma_008_neg_022	335.22400:1115 336.22867:200 337.23333:0	null	0	0	0	0	0	0	274	199	47	286	0	90	144	3154	489
262	8.675	335.224	no MS2: (2E,6E,10Z)-12-hydroxy-10-(hydroxymethyl)-6-methyl-2-(4-methylpent-3-enyl)dodeca-2,6,10-trienoic acid	[M-H]-	null	0.12	False	4.309	335.223	C20H32O4	Acyclic diterpenoids	GWVCYAYKRPLWGK-AAMZJHKISA-N	O=C(O)C(=CCCC(=CCCC(=CCO)CO)C)CCC=C(C)C	530	False	True	False	Normalized unit: Intensity; Annotation method: MSMS-Public_all-neg-VS19_1	False	False	262	0	0	1	-1	-1	-1	-1	-1	1	10.97	Plasma_002_neg_015	335.22321:1692 336.22787:260 337.23254:0	null	0	0	0	0	0	0	3457	4894	1608	1109	1467	1227	783	8243	2805
263	8.808	335.224	no MS2: (2E,6E,10Z)-12-hydroxy-10-(hydroxymethyl)-6-methyl-2-(4-methylpent-3-enyl)dodeca-2,6,10-trienoic acid	[M-H]-	null	0.9	False	4.309	335.223	C20H32O4	Acyclic diterpenoids	GWVCYAYKRPLWGK-AAMZJHKISA-N	O=C(O)C(=CCCC(=CCCC(=CCO)CO)C)CCC=C(C)C	530	False	True	False	Normalized unit: Intensity; Annotation method: MSMS-Public_all-neg-VS19_1	False	False	263	0	0	1	-1	-1	-1	-1	-1	1	497.97	QC_1-1_neg_009	335.22269:3961 336.22735:843 337.23202:350	null	0	0	0	0	0	0	7044	8531	4688	4185	2321	5309	4746	18530	10170
264	8.54	335.224	no MS2: (2E,6E,10Z)-12-hydroxy-10-(hydroxymethyl)-6-methyl-2-(4-methylpent-3-enyl)dodeca-2,6,10-trienoic acid	[M-H]-	null	0.71	False	4.309	335.223	C20H32O4	Acyclic diterpenoids	GWVCYAYKRPLWGK-AAMZJHKISA-N	O=C(O)C(=CCCC(=CCCC(=CCO)CO)C)CCC=C(C)C	530	False	True	False	Normalized unit: Intensity; Annotation method: MSMS-Public_all-neg-VS19_1	False	False	264	0	0	1	-1	-1	-1	-1	-1	1	146.14	QC_2-1_neg_010	335.22281:2866 336.22748:709 337.23214:0	null	0	0	0	0	0	0	6336	7016	4609	4764	658	3399	4848	31107	14696
265	8.941	335.224	no MS2: (2E,6E,10Z)-12-hydroxy-10-(hydroxymethyl)-6-methyl-2-(4-methylpent-3-enyl)dodeca-2,6,10-trienoic acid	[M-H]-	null	0.9	False	4.309	335.223	C20H32O4	Acyclic diterpenoids	GWVCYAYKRPLWGK-AAMZJHKISA-N	O=C(O)C(=CCCC(=CCCC(=CCO)CO)C)CCC=C(C)C	530	False	True	False	Normalized unit: Intensity; Annotation method: MSMS-Public_all-neg-VS19_1	False	False	265	0	0	1	-1	-1	-1	-1	-1	1	941.55	QC_2-1_neg_010	335.22290:7154 336.22757:1671 337.23224:304	null	0	0	0	0	0	0	13726	19044	6672	6942	6275	11904	7016	33184	14663
266	9.222	335.225	no MS2: (2E,6E,10Z)-12-hydroxy-10-(hydroxymethyl)-6-methyl-2-(4-methylpent-3-enyl)dodeca-2,6,10-trienoic acid	[M-H]-	null	0.03	False	4.309	335.223	C20H32O4	Acyclic diterpenoids	GWVCYAYKRPLWGK-AAMZJHKISA-N	O=C(O)C(=CCCC(=CCCC(=CCO)CO)C)CCC=C(C)C	530	False	True	False	Normalized unit: Intensity; Annotation method: MSMS-Public_all-neg-VS19_1	False	False	266	0	0	0.98	-1	-1	-1	-1	-1	0.98	10.37	Plasma_008_neg_022	335.22470:1915 336.22937:393 337.23404:192	null	0	0	0	0	0	0	705	684	103	124	0	359	191	4691	1554
267	11.394	336.256	Unknown	[M-H]-	null	0.04	False	null	null	null	null	null	null	999	False	False	False	Normalized unit: Intensity	False	False	267	0	0	null	null	null	null	null	null	null	1211.67	Plasma_001_neg_014	336.25571:1981 337.26037:389 338.26504:0	null	0	0	0	0	0	0	4871	220	0	1004	0	0	275	542	671
268	5.721	337.042	no MS2: DIHYDROOROTATE	[2M-2H+Na]-	null	0.03	False	-1	337.04	C5H6N2O4	Alpha amino acids and derivatives	UFIVEPVSAGBUSI-UHFFFAOYSA-N	OC(=O)C1CC(=O)NC(=O)N1	530	False	True	False	Normalized unit: Intensity; Annotation method: MSMS-Public_all-neg-VS19_1	False	False	268	0	0	0.98	-1	-1	-1	-1	-1	0.98	1221.34	Plasma_015_neg_030	337.04211:1784 338.04678:350 339.05145:0	null	0	0	0	0	0	0	0	0	0	0	0	57	301	762	0
269	5.089	337.047	no MS2: DIHYDROOROTATE	[2M-2H+Na]-	null	0.57	False	-1	337.04	C5H6N2O4	Alpha amino acids and derivatives	UFIVEPVSAGBUSI-UHFFFAOYSA-N	OC(=O)C1CC(=O)NC(=O)N1	530	False	True	False	Normalized unit: Intensity; Annotation method: MSMS-Public_all-neg-VS19_1	False	False	269	0	0	1	-1	-1	-1	-1	-1	1	1202.34	Plasma_011_neg_026	337.04031:1315 338.04498:250 339.04965:0	null	0	0	0	0	0	0	1356	2295	18	927	0	2931	260	401	0
270	9.446	337.239	no MS2: Lagochilin	[M-H2O-H]-	null	0.12	False	7.336	337.238	C20H36O5	Diterpenoids	XYPPDQHBNJURHU-RHFXQVJCSA-N	OCCC1(OC2(CC1)C(C)CCC3C(C)(CO)C(O)CCC32C)CO	530	False	True	False	Normalized unit: Intensity; Annotation method: MSMS-Public_all-neg-VS19_1	False	False	270	0	0	1	-1	-1	-1	-1	-1	1	813.78	Plasma_008_neg_022	337.23929:1270 338.24396:0 339.24862:0	null	0	0	0	0	0	0	597	946	0	66	0	69	71	2860	527
271	8.808	337.239	no MS2: Lagochilin	[M-H2O-H]-	null	0.01	False	7.336	337.238	C20H36O5	Diterpenoids	XYPPDQHBNJURHU-RHFXQVJCSA-N	OCCC1(OC2(CC1)C(C)CCC3C(C)(CO)C(O)CCC32C)CO	530	False	True	False	Normalized unit: Intensity; Annotation method: MSMS-Public_all-neg-VS19_1	False	False	271	0	0	1	-1	-1	-1	-1	-1	1	921.94	Plasma_013_neg_028	337.23929:999 338.24396:186 339.24862:0	null	0	0	0	0	0	0	0	0	0	0	0	36	0	1090	99
272	1.042	341.038	no MS2: Pesticide2_Thiophanate-methyl_C12H14N4O4S2_	[M-H]-	null	0.01	False	-1	341.038	C12H14N4O4S2	Benzene and substituted derivatives	QGHREAKMXXNCOA-UHFFFAOYSA-N	COC(=O)NC(=S)NC1=CC=CC=C1NC(=S)NC(=O)OC	530	False	True	False	Normalized unit: Intensity; Annotation method: MSMS-Public_all-neg-VS19_1	False	False	272	0	0	1	-1	-1	-1	-1	-1	1	25.65	Plasma_030_neg_053	341.03839:904 342.04306:0 343.04773:0	null	0	0	0	0	0	0	210	174	142	241	326	20	380	0	269
273	0.808	341.109	no MS2: PALATINOSE	[M-H]-	null	0.09	False	1.949	341.109	C12H22O11	O-glycosyl compounds	PVXPPJIGRGXGCY-TZLCEDOOSA-N	C([C@@H]1[C@H]([C@@H]([C@H]([C@H](O1)OC[C@@H]2[C@H]([C@@H](C(O2)(CO)O)O)O)O)O)O)O	530	False	True	False	Normalized unit: Intensity; Annotation method: MSMS-Public_all-neg-VS19_1	False	False	273	0	0	1	-1	-1	-1	-1	-1	1	26.74	Blind_4_neg_008	341.10941:1085 342.11407:158 343.11874:0	null	1908	1744	1779	2420	1862	1854	0	0	0	0	0	0	18	0	16
274	0.793	342	Unknown	[M-H]-	null	0.84	False	null	null	null	null	null	null	999	False	False	False	Normalized unit: Intensity	False	False	274	0	0	null	null	null	null	null	null	null	116.79	Plasma_006_neg_020	342.00049:5134 343.00516:755 344.00982:0	null	0	0	0	0	0	0	21717	25906	18878	12860	10446	29649	22547	10825	9093
275	0.71	343.097	no MS2: NCGC00381184-01_C15H20O9_	[M-H]-	null	0.09	False	-1	343.103	C15H20O9	Phenolic glycosides	APQFDHZCDLNMLA-APACUCGBSA-N	OC[C@H]1O[C@@H](OC2=C(CCC(O)=O)C=CC=C2O)[C@H](O)[C@@H](O)[C@@H]1O	530	False	True	False	Normalized unit: Intensity; Annotation method: MSMS-Public_all-neg-VS19_1	False	False	275	0	0	0.99	-1	-1	-1	-1	-1	0.99	795.92	Plasma_046_neg_078	343.10199:855 344.10666:0 345.11133:0	null	0	0	0	0	0	0	330	387	597	120	2253	753	698	25	581
276	7.468	343.214	no MS2: FA 18:2+4O; PlaSMA ID-797	[M-H]-	null	0.38	False	4.82	343.212	C18H32O6	Oxidized fatty acids	BHWUKOCNOLCGLB-UHFFFAOYNA-N	O=C(O)CCCCCCCC(O)C=CC1OC(CC1(O))C(O)CC	530	False	True	False	Normalized unit: Intensity; Annotation method: MSMS-Public_all-neg-VS19_1	False	False	276	0	0	1	-1	-1	-1	-1	-1	1	113.73	QC_3-1_neg_011	343.21231:1441 344.21698:293 345.22165:0	null	0	0	0	0	0	0	14	20	17	16	0	52	870	17531	3567
277	5.872	343.214	no MS2: Acaranoic acid	[M+HCOO]-	null	0.01	False	-1	343.213	C17H30O4	Delta valerolactones	SRMPRRDLILJEAW-SOUVJXGZSA-N	CCCCCCCCCC[C@H]1C[C@H]([C@@H](C(=O)O1)C)C(=O)O	530	False	True	False	Normalized unit: Intensity; Annotation method: MSMS-Public_all-neg-VS19_1	False	False	277	0	0	0.99	-1	-1	-1	-1	-1	0.99	7.53	Plasma_008_neg_022	343.21399:2880 344.21866:519 345.22332:0	null	0	0	0	0	0	0	415	49	1032	1997	0	0	2219	3629	2701
278	7.299	343.214	no MS2: Acaranoic acid	[M+HCOO]-	null	0.06	False	-1	343.213	C17H30O4	Delta valerolactones	SRMPRRDLILJEAW-SOUVJXGZSA-N	CCCCCCCCCC[C@H]1C[C@H]([C@@H](C(=O)O1)C)C(=O)O	530	False	True	False	Normalized unit: Intensity; Annotation method: MSMS-Public_all-neg-VS19_1	False	False	278	0	0	0.99	-1	-1	-1	-1	-1	0.99	18.17	Plasma_012_neg_027	343.21390:1513 344.21857:262 345.22323:0	null	0	0	0	0	0	0	0	0	0	0	0	0	213	5784	1182
279	5.525	343.214	no MS2: Acaranoic acid	[M+HCOO]-	null	0.01	False	-1	343.213	C17H30O4	Delta valerolactones	SRMPRRDLILJEAW-SOUVJXGZSA-N	CCCCCCCCCC[C@H]1C[C@H]([C@@H](C(=O)O1)C)C(=O)O	530	False	True	False	Normalized unit: Intensity; Annotation method: MSMS-Public_all-neg-VS19_1	False	False	279	0	0	0.99	-1	-1	-1	-1	-1	0.99	12.71	Plasma_008_neg_022	343.21429:1920 344.21896:390 345.22363:276	null	0	0	0	0	0	0	65	0	15	47	0	28	111	4991	1157
280	7.212	343.995	Unknown	[M-H]-	null	0.75	False	null	null	null	null	null	null	999	False	False	False	Normalized unit: Intensity	False	False	280	0	0	null	null	null	null	null	null	null	22.77	Plasma_003_neg_016	343.99500:2484 344.99966:437 346.00433:0	null	24	36	38	0	75	31	8230	8485	5043	6954	7632	3115	6991	7879	4694
281	0.793	343.996	Unknown	[M-H]-	null	0.91	False	null	null	null	null	null	null	999	False	False	False	Normalized unit: Intensity	False	False	281	0	0	null	null	null	null	null	null	null	1369.34	Plasma_006_neg_020	343.99591:79597 345.00058:11298 346.00525:2419	null	76	185	146	0	182	213	570722	549048	522373	586491	529345	580331	541831	529067	484129
282	2.099	343.997	Unknown	[M-H]-	null	0.12	False	null	null	null	null	null	null	999	False	False	False	Normalized unit: Intensity	False	False	282	0	0	null	null	null	null	null	null	null	45.82	Plasma_003_neg_016	343.99649:8771 345.00116:1227 346.00583:314	null	60	49	38	0	87	175	29497	26227	56611	15408	9022	4595	18938	3502	2091
283	3.678	343.998	Unknown	[M-H]-	null	0.88	False	null	null	null	null	null	null	999	False	False	False	Normalized unit: Intensity	False	False	283	0	0	null	null	null	null	null	null	null	40.89	Plasma_014_neg_029	343.99799:4463 345.00265:642 346.00732:0	null	23	11	16	0	78	35	14619	11208	13631	9276	8650	11424	11771	12631	1398
284	1.109	344.002	Unknown	[M-H]-	null	0.04	False	null	null	null	null	null	null	999	False	False	False	Normalized unit: Intensity	False	False	284	0	0	null	null	null	null	null	null	null	15.54	QC_1-4_neg_080	344.00180:15817 345.00647:2043 346.01114:538	null	95	29	86	0	330	256	52380	11378	11246	25754	17233	12406	16851	23600	29271
285	0.791	344.113	no MS2: Omeprazole	[M-H]-	null	0.28	False	8.138	344.107	C17H19N3O3S	Sulfinylbenzimidazoles	SUBDBMMJDZJVOS-UHFFFAOYSA-N	COC1=CC=C2N=C(NC2=C1)S(=O)CC1=NC=C(C)C(OC)=C1C	530	False	True	False	Normalized unit: Intensity; Annotation method: MSMS-Public_all-neg-VS19_1	False	False	285	0	0	1	-1	-1	-1	-1	-1	1	76.41	Plasma_046_neg_078	344.10721:4559 345.11188:321 346.11654:0	null	0	0	0	0	0	0	631	231	414	407	346	401	530	829	256
286	0.791	344.129	Unknown	[M-H]-	null	0.03	False	null	null	null	null	null	null	999	False	False	False	Normalized unit: Intensity	False	False	286	0	0	null	null	null	null	null	null	null	11.4	Plasma_017_neg_038	344.12939:1233 345.13406:137 346.13873:0	null	0	0	0	0	0	0	934	1982	1239	924	852	1016	288	710	800
287	7.407	345.234	no MS2: Unknown (carbon number 18); PlaSMA ID-808	[M-H]-	null	0.03	False	5.86	345.228	C18H34O6	Unknown	null	null	530	False	True	False	Normalized unit: Intensity; Annotation method: MSMS-Public_all-neg-VS19_1	False	False	287	0	0	1	-1	-1	-1	-1	-1	0.9	1093.09	Plasma_003_neg_016	345.22830:1332 346.23297:342 347.23764:0	null	0	0	0	0	0	0	3842	0	5572	2461	0	18	5344	950	3529
288	1.049	346.058	no MS2: Adenosine monophosphate	[M-H]-	null	0.04	False	10.185	346.056	C10H14N5O7P	Purine ribonucleoside monophosphates	UDMBCSSLTHHNCD-KQYNXXCUSA-N	C1=NC(=C2C(=N1)N(C=N2)[C@H]3[C@@H]([C@@H]([C@H](O3)COP(=O)(O)O)O)O)N	530	False	True	False	Normalized unit: Intensity; Annotation method: MSMS-Public_all-neg-VS19_1	False	False	288	0	0	1	-1	-1	-1	-1	-1	1	24.79	Plasma_008_neg_022	346.05661:914 347.06128:0 348.06595:0	null	0	0	0	0	0	0	107	28	392	392	568	96	936	2067	152
289	5.415	350.983	Unknown	[M-H]-	null	0.01	False	null	null	null	null	null	null	999	False	False	False	Normalized unit: Intensity	False	False	289	0	0	null	null	null	null	null	null	null	803.13	Plasma_006_neg_020	350.98270:837 351.98736:0 352.99203:0	null	0	0	0	0	0	0	0	0	0	0	317	1614	0	0	0
290	7.781	351.219	no MS2: PGE2	[M-H]-	null	0.03	False	-1	351.218	C20H32O5	Prostaglandins and related compounds	XEYBRNLFEZDVAW-ARSRFYASSA-N	CCCCC[C@@H](/C=C/[C@H]1[C@@H](CC(=O)[C@@H]1C/C=C\CCCC(=O)O)O)O	530	False	True	False	Normalized unit: Intensity; Annotation method: MSMS-Public_all-neg-VS19_1	False	False	290	0	0	1	-1	-1	-1	-1	-1	1	15.18	Plasma_004_neg_017	351.21860:1083 352.22327:265 353.22793:0	null	0	0	0	0	0	0	273	170	310	2750	0	292	1647	7311	3834
291	8.495	351.219	no MS2: PGE2	[M-H]-	null	0.01	False	-1	351.218	C20H32O5	Prostaglandins and related compounds	XEYBRNLFEZDVAW-ARSRFYASSA-N	CCCCC[C@@H](/C=C/[C@H]1[C@@H](CC(=O)[C@@H]1C/C=C\CCCC(=O)O)O)O	530	False	True	False	Normalized unit: Intensity; Annotation method: MSMS-Public_all-neg-VS19_1	False	False	291	0	0	0.99	-1	-1	-1	-1	-1	0.99	18.11	Plasma_008_neg_022	351.21939:2100 352.22406:470 353.22873:243	null	0	0	0	0	0	0	140	87	85	72	0	19	1024	5898	2549
292	8.638	351.219	no MS2: PGE2	[M-H]-	null	0.03	False	-1	351.218	C20H32O5	Prostaglandins and related compounds	XEYBRNLFEZDVAW-ARSRFYASSA-N	CCCCC[C@@H](/C=C/[C@H]1[C@@H](CC(=O)[C@@H]1C/C=C\CCCC(=O)O)O)O	530	False	True	False	Normalized unit: Intensity; Annotation method: MSMS-Public_all-neg-VS19_1	False	False	292	0	0	0.99	-1	-1	-1	-1	-1	0.99	23.11	Plasma_009_neg_023	351.21921:1366 352.22388:295 353.22854:290	null	0	0	0	0	0	0	151	121	117	37	0	58	1581	9766	3277
293	0.714	352.096	Unknown	[M-H]-	null	0.65	False	null	null	null	null	null	null	999	False	False	False	Normalized unit: Intensity	False	False	293	0	0	null	null	null	null	null	null	null	1146.16	Plasma_008_neg_022	352.09549:2401 353.10016:9451 354.10483:0	null	0	0	0	0	0	0	1230	1397	1126	1083	226	974	1504	3942	857
294	0.792	353.001	no MS2: "2,4-Dichlorolichexanthone"	[M-H]-	null	0.54	False	-1	352.999	C16H12Cl2O5	Xanthones	ZPLILIOXZHNNLY-UHFFFAOYSA-N	O=C1C2=C(C=C(C=C2C)OC)OC3=C1C(O)=C(C(OC)=C3Cl)Cl	530	False	True	False	Normalized unit: Intensity; Annotation method: MSMS-Public_all-neg-VS19_1	False	False	294	0	0	1	-1	-1	-1	-1	-1	1	1607.32	Plasma_009_neg_023	352.99890:1381 354.00357:0 355.00824:0	null	0	0	0	0	0	0	2370	1544	3477	2249	2221	1030	3529	2490	4089
295	6.108	353.034	Unknown	[M-H]-	null	0.01	False	null	null	null	null	null	null	999	False	False	False	Normalized unit: Intensity	False	False	295	0	0	null	null	null	null	null	null	null	1168.56	Plasma_007_neg_021	353.03391:1099 354.03857:180 355.04324:0	null	0	0	0	0	0	0	37	109	0	559	0	18	2961	0	53
296	0.714	353.091	no MS2: Chlorogenic acid	[M-H]-	null	0.91	False	7.112	353.088	C16H18O9	Quinic acids and derivatives	CWVRJTMFETXNAD-JUHZACGLSA-N	O=C(O)C1(O)CC(O)C(O)C(OC(=O)C=CC2=CC=C(O)C(O)=C2)C1	530	False	True	False	Normalized unit: Intensity; Annotation method: MSMS-Public_all-neg-VS19_1	False	False	296	0	0	0.98	-1	-1	-1	-1	-1	0.98	3883.14	QC_1-1_neg_009	353.09000:3756 354.09466:519 355.09933:202	null	0	0	0	0	0	0	5338	6605	5044	4666	1654	4667	6295	16199	4169
297	12.419	353.146	no MS2: NCGC00180260-02!5,7-dihydroxy-2-(4-methoxyphenyl)-6-(3-methylbut-2-enyl)-2,3-dihydrochromen-4-one	[M-H]-	null	0.04	False	-1	353.139	C21H22O5	6-prenylated flavanones	ZTDRTMVBTLHQII-UHFFFAOYSA-N	COC1=CC=C(C=C1)C2CC(=O)C3=C(O2)C=C(O)C(CC=C(C)C)=C3O	530	False	True	False	Normalized unit: Intensity; Annotation method: MSMS-Public_all-neg-VS19_1	False	False	297	0	0	0.94	-1	-1	-1	-1	-1	0.94	1243.67	QC_1-1_neg_009	353.14301:961 354.14767:242 355.15234:0	null	0	0	0	0	0	0	1307	390	181	247	137	25	1369	4569	729
298	11.129	353.2	no MS2: (E)-3-(4-acetyloxy-2,3-dihydroxy-2,5,5,8a-tetramethyl-3,4,4a,6,7,8-hexahydro-1H-naphthalen-1-yl)prop-2-enoic acid	[M-H]-	null	0.57	False	-1	353.197	C19H30O6	Dicarboxylic acids and derivatives	OZESVNMBZAEFCX-BQYQJAHWSA-N	O=C(O)C=CC1C(O)(C)C(O)C(OC(=O)C)C2C(C)(C)CCCC12C	530	False	True	False	Normalized unit: Intensity; Annotation method: MSMS-Public_all-neg-VS19_1	False	False	298	0	0	0.94	-1	-1	-1	-1	-1	0.94	491.22	Blind_4_neg_008	353.20041:1634 354.20508:322 355.20974:0	null	3483	3253	2216	4068	1601	3572	1745	1702	3410	3454	3653	2141	2048	3536	1850
299	7.543	353.235	no MS2: Prostaglandin E1	[M-H]-	null	0.01	False	1.357	353.233	C20H34O5	Prostaglandins and related compounds	GMVPRGQOIOIIMI-DWKJAMRDSA-N	O=C(O)CCCCCCC1C(=O)CC(O)C1C=CC(O)CCCCC	530	False	True	False	Normalized unit: Intensity; Annotation method: MSMS-Public_all-neg-VS19_1	False	False	299	0	0	0.99	-1	-1	-1	-1	-1	0.99	18.19	Plasma_008_neg_022	353.23450:1823 354.23916:404 355.24383:0	null	0	0	0	0	0	0	896	372	82	933	34	41	2590	5659	2198
300	8.665	353.235	no MS2: Prostaglandin E1	[M+CH3COO]-	null	0.01	False	1.357	353.233	C20H34O5	Prostaglandins and related compounds	GMVPRGQOIOIIMI-DWKJAMRDSA-N	O=C(O)CCCCCCC1C(=O)CC(O)C1C=CC(O)CCCCC	530	False	True	False	Normalized unit: Intensity; Annotation method: MSMS-Public_all-neg-VS19_1	False	False	300	0	0	0.99	-1	-1	-1	-1	-1	0.99	13.02	Plasma_008_neg_022	353.23480:1523 354.23947:381 355.24414:0	null	0	0	0	0	0	0	350	871	54	0	0	223	649	4584	1283
301	0.79	354.998	no MS2: Rhodocladonic acid	[M+K-2H]-	null	0.22	False	-1	354.986	C15H10O8	Naphthofurans	XKWWCTISHMFHJB-UHFFFAOYSA-N	CC(=O)c1c(c2c(o1)cc1c(c2O)C(=O)C(=O)C(=C1O)OC)O	530	False	True	False	Normalized unit: Intensity; Annotation method: MSMS-Public_all-neg-VS19_1	False	False	301	0	0	0.65	-1	-1	-1	-1	-1	0.65	787.96	Plasma_012_neg_027	354.99539:917 356.00006:0 357.00473:612	null	0	0	0	0	0	0	1516	2650	2223	1251	560	704	940	844	2284
302	8.658	355.214	Unknown	[M-H]-	null	0.01	False	null	null	null	null	null	null	999	False	False	False	Normalized unit: Intensity	False	False	302	0	0	null	null	null	null	null	null	null	16.05	Plasma_008_neg_022	355.21439:1217 356.21905:246 357.22372:0	null	0	0	0	0	0	0	0	0	0	0	0	0	129	2851	18
303	7.745	355.25	no MS2: Lagochilin	[M-H]-	null	0.01	False	-1	355.249	C20H36O5	Diterpenoids	XYPPDQHBNJURHU-RHFXQVJCSA-N	OCCC1(OC2(CC1)C(C)CCC3C(C)(CO)C(O)CCC32C)CO	530	False	True	False	Normalized unit: Intensity; Annotation method: MSMS-Public_all-neg-VS19_1	False	False	303	0	0	1	-1	-1	-1	-1	-1	1	27.89	Plasma_008_neg_022	355.24991:2143 356.25458:444 357.25924:0	null	0	0	0	0	0	0	0	18	0	15	0	0	265	8460	297
304	0.58	356.929	no MS2: Triclabendazole	[M+HCOO]-	null	0.9	False	1.004	356.943	C14H9Cl3N2OS	Diarylethers	NQPDXQQQCQDHHW-UHFFFAOYSA-N	ClC1=CC=CC(OC2=CC=3N=C(SC)NC3C=C2Cl)=C1Cl	530	False	True	False	Normalized unit: Intensity; Annotation method: MSMS-Public_all-neg-VS19_1	False	False	304	0	0	0.64	-1	-1	-1	-1	-1	0.64	231.23	Plasma_043_neg_074	356.93341:1485 357.93808:239 358.94275:0	null	0	0	0	97	0	0	943	1070	1143	728	700	813	807	785	846
305	0.787	356.998	no MS2: PFCA-H; C8H5F11O3	[M-H]-	null	0.01	False	-1	356.999	C8H5F11O3	Carboxylic acids	JMYMIPCNDZAAOL-UHFFFAOYSA-N	O=C(O)COCC(F)(F)C(F)(F)C(F)(F)C(F)(F)C(F)(F)F	530	False	True	False	Normalized unit: Intensity; Annotation method: MSMS-Public_all-neg-VS19_1	False	False	305	0	0	0.99	-1	-1	-1	-1	-1	0.99	79.92	Plasma_020_neg_041	356.99771:2774 358.00238:366 359.00705:0	null	0	0	0	0	0	0	866	796	905	598	373	294	532	540	489
306	0.589	362.945	no MS2: 2,2',6,6'-Tetrachlorobisphenol A	[M-H]-	null	0.91	False	19.009	362.952	C15H12Cl4O2	Bisphenols	KYPYTERUKNKOLP-UHFFFAOYSA-N	CC(C)(C1=CC(Cl)=C(O)C(Cl)=C1)C1=CC(Cl)=C(O)C(Cl)=C1	530	False	True	False	Normalized unit: Intensity; Annotation method: MSMS-Public_all-neg-VS19_1	False	False	306	0	0	0.99	-1	-1	-1	-1	-1	0.99	2235.35	QC_3-4_neg_082	362.95050:2376 363.95517:448 364.95984:0	null	0	0	0	0	0	0	2893	3468	4068	2609	2333	2793	2685	2437	2938
307	10.238	363.218	Unknown	[M-H]-	null	0.01	False	null	null	null	null	null	null	999	False	False	False	Normalized unit: Intensity	False	False	307	0	0	null	null	null	null	null	null	null	14.05	Plasma_008_neg_022	363.21771:1316 364.22238:335 365.22705:0	null	0	0	0	0	0	0	516	18	0	142	0	40	317	3232	475
308	9.393	363.256	no MS2: 5-[(1S,2R,4aR)-5-(acetyloxymethyl)-1,2,4a-trimethyl-2,3,4,7,8,8a-hexahydronaphthalen-1-yl]-3-methylpentanoic acid	[M-H]-	null	0.01	False	5.849	363.254	C22H36O4	Colensane and clerodane diterpenoids	QSEIUMVWJJWZJP-PXZOOIHESA-N	O=C(OCC1=CCCC2C1(C)CCC(C)C2(C)CCC(C)CC(=O)O)C	530	False	True	False	Normalized unit: Intensity; Annotation method: MSMS-Public_all-neg-VS19_1	False	False	308	0	0	0.98	-1	-1	-1	-1	-1	0.98	11.7	Plasma_008_neg_022	363.25589:1130 364.26056:207 365.26523:0	null	0	0	0	0	0	0	14	38	0	0	0	0	0	3308	483
309	9.56	363.256	no MS2: 5-[(1S,2R,4aR)-5-(acetyloxymethyl)-1,2,4a-trimethyl-2,3,4,7,8,8a-hexahydronaphthalen-1-yl]-3-methylpentanoic acid	[M-H]-	null	0.01	False	5.849	363.254	C22H36O4	Colensane and clerodane diterpenoids	QSEIUMVWJJWZJP-PXZOOIHESA-N	O=C(OCC1=CCCC2C1(C)CCC(C)C2(C)CCC(C)CC(=O)O)C	530	False	True	False	Normalized unit: Intensity; Annotation method: MSMS-Public_all-neg-VS19_1	False	False	309	0	0	0.98	-1	-1	-1	-1	-1	0.98	12.13	Plasma_008_neg_022	363.25629:1045 364.26095:314 365.26562:0	null	0	0	0	0	0	0	34	33	0	0	0	20	0	2373	448
310	0.637	364.885	Unknown	[M-H]-	null	0.87	False	null	null	null	null	null	null	999	False	False	False	Normalized unit: Intensity	False	False	310	0	0	null	null	null	null	null	null	null	904.22	Plasma_036_neg_066	364.88480:1220 365.88946:0 366.89413:0	null	0	0	0	0	0	0	848	857	766	892	945	919	909	820	932
311	7.042	365.211	no MS2: C24H30O3; PlaSMA ID-884	[M+Cl]-	null	0.01	False	8.51	365.211	C24H30O3	Formula predicted	null	null	530	False	True	False	Normalized unit: Intensity; Annotation method: MSMS-Public_all-neg-VS19_1	False	False	311	0	0	1	-1	-1	-1	-1	-1	0.9	56.09	Plasma_008_neg_022	365.21140:2876 366.21606:573 367.22073:1620	null	0	0	0	0	0	0	606	38	131	225	13	162	1997	9749	2067
312	0.701	366.113	Unknown	[M-H]-	null	0.88	False	null	null	null	null	null	null	999	False	False	False	Normalized unit: Intensity	False	False	312	0	0	null	null	null	null	null	null	null	2270.43	Plasma_025_neg_047	366.11331:3543 367.11798:14913 368.12265:2194	null	0	0	0	0	0	0	5172	6362	5323	5305	2856	3014	4006	4456	3030
313	0.701	367.11	no MS2: Feruloyl quinic acid (isomer of 886, 887); PlaSMA ID-888	[M-H]-	null	0.91	False	3.98	367.105	C17H20O9	Quinic acid and derivatives	RAGZUCNPTLULOL-UHFFFAOYNA-N	O=C(OC1CC(O)(C(=O)O)CC(O)C1(O))C=CC=2C=CC(O)=C(OC)C=2	530	False	True	False	Normalized unit: Intensity; Annotation method: MSMS-Public_all-neg-VS19_1	False	False	313	0	0	1	-1	-1	-1	-1	-1	1	5000.74	QC_1-1_neg_009	367.10559:8652 368.11026:1295 369.11493:436	null	0	0	0	0	0	0	22618	27465	22589	23211	12406	7750	17520	19143	13003
314	8.815	367.215	no MS2: NCGC00380425-01!1-(3,5-dihydroxyphenyl)-12-hydroxytridecan-2-one	[M+HCOO]-	null	0.01	False	-1	367.213	C19H30O4	Long-chain fatty alcohols	LPIOEJKQFMDVFS-UHFFFAOYSA-N	CC(O)CCCCCCCCCC(=O)CC1=CC(O)=CC(O)=C1	530	False	True	False	Normalized unit: Intensity; Annotation method: MSMS-Public_all-neg-VS19_1	False	False	314	0	0	0.98	-1	-1	-1	-1	-1	0.98	27.08	Plasma_008_neg_022	367.21460:1622 368.21927:343 369.22394:0	null	0	0	0	0	0	0	931	873	273	262	0	336	657	5262	2229
315	0.72	369.091	no MS2: Parecoxib	[M-H]-	null	0.06	False	0.982	369.091	C19H18N2O4S	Benzenesulfonamides	TZRHLKRLEZJVIJ-UHFFFAOYSA-N	O=S(=O)(N=C(O)CC)C1=CC=C(C=C1)C=2C(=NOC2C)C=3C=CC=CC3	530	False	True	False	Normalized unit: Intensity; Annotation method: MSMS-Public_all-neg-VS19_1	False	False	315	0	0	1	-1	-1	-1	-1	-1	1	464.86	Plasma_045_neg_076	369.09149:1075 370.09616:0 371.10083:0	null	0	0	0	0	0	0	173	157	117	0	0	19	745	1444	172
316	3.083	369.132	no MS2: NCGC00380677-01!5,7-dihydroxy-2-(4-hydroxy-3-methoxyphenyl)-6-(3-methylbut-2-enyl)-2,3-dihydrochromen-4-one	[M-H]-	null	0.76	False	-1	369.134	C21H22O6	6-prenylated flavanones	GWVGVAPNTKLROZ-UHFFFAOYSA-N	COC1=C(O)C=CC(=C1)C2CC(=O)C3=C(O)C(CC=C(C)C)=C(O)C=C3O2	530	False	True	False	Normalized unit: Intensity; Annotation method: MSMS-Public_all-neg-VS19_1	False	False	316	0	0	1	-1	-1	-1	-1	-1	1	1087.14	Plasma_020_neg_041	369.13419:1229 370.13885:286 371.14352:0	null	0	0	0	0	0	0	2345	3658	4106	2715	3578	9140	2477	3050	1376
317	7.038	369.179	no MS2: Gardnerine; PlaSMA ID-898	[M+HCOO]-	null	0.01	False	3.69	369.182	C20H24N2O2	Alkaloids	RBALEJFQJCAPLN-UHFFFAOYNA-N	COC1=CC=C2C(NC3=C2CC2C(CO)C4CC3N2CC4=CC)=C1	530	False	True	False	Normalized unit: Intensity; Annotation method: MSMS-Public_all-neg-VS19_1	False	False	317	0	0	0.96	-1	-1	-1	-1	-1	0.96	803.88	Plasma_030_neg_053	369.17920:760 370.18387:0 371.18853:0	null	0	0	0	0	0	0	451	447	242	598	92	37	1462	22	78
318	6.55	369.229	no MS2: (E)-4-[(1R,2S,3S,4R,8aS)-2,3,4-trihydroxy-2,5,5,8a-tetramethyl-3,4,4a,6,7,8-hexahydro-1H-naphthalen-1-yl]but-3-en-2-one	[M+CH3COO]-	null	0.01	False	3.929	369.228	C18H30O4	Sesquiterpenoids	GUVJPXABQYFWPD-GSZDNMEJSA-N	O=C(C=CC1C(O)(C)C(O)C(O)C2C(C)(C)CCCC12C)C	530	False	True	False	Normalized unit: Intensity; Annotation method: MSMS-Public_all-neg-VS19_1	False	False	318	0	0	1	-1	-1	-1	-1	-1	1	10.24	Plasma_008_neg_022	369.22919:3238 370.23385:846 371.23852:0	null	0	0	0	0	0	0	3175	570	755	162	399	306	1470	12194	3265
319	7.67	369.229	no MS2: (E)-4-[(1R,2S,3S,4R,8aS)-2,3,4-trihydroxy-2,5,5,8a-tetramethyl-3,4,4a,6,7,8-hexahydro-1H-naphthalen-1-yl]but-3-en-2-one	[M+CH3COO]-	null	0.01	False	3.929	369.228	C18H30O4	Sesquiterpenoids	GUVJPXABQYFWPD-GSZDNMEJSA-N	O=C(C=CC1C(O)(C)C(O)C(O)C2C(C)(C)CCCC12C)C	530	False	True	False	Normalized unit: Intensity; Annotation method: MSMS-Public_all-neg-VS19_1	False	False	319	0	0	0.99	-1	-1	-1	-1	-1	0.99	12.02	Plasma_008_neg_022	369.22940:2513 370.23407:619 371.23874:351	null	0	0	0	0	0	0	499	399	39	193	0	35	963	8073	2384
320	7.261	369.229	no MS2: (E)-4-[(1R,2S,3S,4R,8aS)-2,3,4-trihydroxy-2,5,5,8a-tetramethyl-3,4,4a,6,7,8-hexahydro-1H-naphthalen-1-yl]but-3-en-2-one	[M+CH3COO]-	null	0.76	False	3.929	369.228	C18H30O4	Sesquiterpenoids	GUVJPXABQYFWPD-GSZDNMEJSA-N	O=C(C=CC1C(O)(C)C(O)C(O)C2C(C)(C)CCCC12C)C	530	False	True	False	Normalized unit: Intensity; Annotation method: MSMS-Public_all-neg-VS19_1	False	False	320	0	0	1	-1	-1	-1	-1	-1	1	17.58	Plasma_003_neg_016	369.22821:1202 370.23288:250 371.23755:0	null	0	0	0	0	0	0	3140	4299	3400	2713	485	1217	5860	14777	8643
321	7.532	369.23	no MS2: (E)-4-[(1R,2S,3S,4R,8aS)-2,3,4-trihydroxy-2,5,5,8a-tetramethyl-3,4,4a,6,7,8-hexahydro-1H-naphthalen-1-yl]but-3-en-2-one	[M+CH3COO]-	null	0.01	False	3.929	369.228	C18H30O4	Sesquiterpenoids	GUVJPXABQYFWPD-GSZDNMEJSA-N	O=C(C=CC1C(O)(C)C(O)C(O)C2C(C)(C)CCCC12C)C	530	False	True	False	Normalized unit: Intensity; Annotation method: MSMS-Public_all-neg-VS19_1	False	False	321	0	0	0.99	-1	-1	-1	-1	-1	0.99	13.21	Plasma_008_neg_022	369.23001:2768 370.23468:673 371.23935:391	null	0	0	0	0	0	0	691	226	139	478	0	18	1657	8252	2835
322	0.58	372.906	Unknown	[M-H]-	null	0.91	False	null	null	null	null	null	null	999	False	False	False	Normalized unit: Intensity	False	False	322	0	0	null	null	null	null	null	null	null	846.49	Plasma_025_neg_047	372.90640:2424 373.91107:0 374.91574:0	null	0	0	0	0	0	0	1773	1467	1241	1415	1563	1525	1577	1669	1366
323	0.632	374.91	Unknown	[M-H]-	null	0.91	False	null	null	null	null	null	null	999	False	False	False	Normalized unit: Intensity	False	False	323	0	0	null	null	null	null	null	null	null	647.32	Plasma_016_neg_037	374.91031:2524 375.91498:189 376.91964:0	null	0	0	0	0	0	0	1611	1641	1488	1810	1803	1760	1709	1569	1804
324	5.967	377.073	no MS2: kynurenic_acid	[2M-H]-	null	0.78	False	-1	377.078	C10H7NO3	Quinoline carboxylic acids	HCZHHEIFKROPDY-UHFFFAOYSA-N	C1=CC=C2C(=C1)C(=O)C=C(N2)C(=O)O	530	False	True	False	Normalized unit: Intensity; Annotation method: MSMS-Public_all-neg-VS19_1	False	False	324	0	0	1	-1	-1	-1	-1	-1	1	50.57	Plasma_044_neg_075	377.07800:1927 378.08267:405 379.08734:0	null	0	0	0	0	0	0	3977	7084	1304	4856	0	6996	1562	12079	210
325	0.725	377.089	no MS2: NCGC00169010-02_C18H18O9_Naphtho[2,3-c]furan-1(3H)-one, 8-(beta-D-glucopyranosyloxy)-9-hydroxy-	[M-H]-	null	0.85	False	-1	377.088	C18H18O9	Phenolic glycosides	SGQJDTLFQCDZGS-UQEKQVNISA-N	OC[C@H]1O[C@@H](OC2=C3C(=C4C(=O)OCC4=CC3=CC=C2)O)[C@H](O)[C@@H](O)[C@@H]1O	530	False	True	False	Normalized unit: Intensity; Annotation method: MSMS-Public_all-neg-VS19_1	False	False	325	0	0	1	-1	-1	-1	-1	-1	1	3237.09	Plasma_012_neg_027	377.08771:12491 378.09238:1830 379.09704:0	null	449	247	207	1057	471	496	5729	6981	4216	3273	11081	27711	30096	15524	33857
326	8.846	377.271	no MS2: 5-[1,2,4a-trimethyl-5-(propanoyloxymethyl)-2,3,4,7,8,8a-hexahydronaphthalen-1-yl]-3-methylpentanoic acid	[M-H]-	null	0.04	False	6.216	377.27	C23H38O4	Colensane and clerodane diterpenoids	CWUFYVAGTYUTRR-UHFFFAOYSA-N	O=C(O)CC(C)CCC1(C)C(C)CCC2(C(=CCCC21)COC(=O)CC)C	530	False	True	False	Normalized unit: Intensity; Annotation method: MSMS-Public_all-neg-VS19_1	False	False	326	0	0	1	-1	-1	-1	-1	-1	1	1417.56	Plasma_009_neg_023	377.27039:942 378.27505:0 379.27972:0	null	0	0	0	0	0	0	1093	109	19	1277	4123	881	1680	719	2062
327	10.245	378.151	Unknown	[M-H]-	null	0.01	False	null	null	null	null	null	null	999	False	False	False	Normalized unit: Intensity	False	False	327	0	0	null	null	null	null	null	null	null	1268.94	Plasma_008_neg_022	378.15149:1296 379.15616:368 380.16082:0	null	0	0	0	0	0	0	101	0	0	0	0	0	0	3173	100
328	8.874	378.245	no MS2: Celiprolol	[M-H]-	null	0.47	False	5.5	378.24	C20H33N3O4	Alkyl-phenylketones	JOATXPAWOHTVSZ-UHFFFAOYSA-N	CCN(CC)C(=O)NC1=CC(=C(C=C1)OCC(CNC(C)(C)C)O)C(=O)C	530	False	True	False	Normalized unit: Intensity; Annotation method: MSMS-Public_all-neg-VS19_1	False	False	328	0	0	0.99	-1	-1	-1	-1	-1	0.99	1507.02	QC_1-1_neg_009	378.24100:1511 379.24567:391 380.25033:0	null	0	0	0	0	0	0	2890	2424	725	1031	5817	3103	1616	5194	4659
329	0.589	378.919	Unknown	[M-H]-	null	0.91	False	null	null	null	null	null	null	999	False	False	False	Normalized unit: Intensity	False	False	329	0	0	null	null	null	null	null	null	null	2208.87	Plasma_001_neg_014	378.91919:4201 379.92386:369 380.92852:0	null	0	0	0	0	0	0	5798	5511	4941	4878	5260	5292	5222	5312	4893
330	0.722	379.087	no MS2: HippuricAcid	[M+Cl]-	null	0.51	False	-1	379.091	C9H9NO3	Hippuric acids	QIAFMBKCNZACKA-UHFFFAOYSA-N	C1=CC=C(C=C1)C(=O)NCC(=O)O	530	False	True	False	Normalized unit: Intensity; Annotation method: MSMS-Public_all-neg-VS19_1	False	False	330	0	0	1	-1	-1	-1	-1	-1	1	63.84	Plasma_046_neg_078	379.09119:3522 380.09585:647 381.10052:873	null	0	0	0	56	0	0	258	2475	113	501	871	10148	10906	5627	6949
331	4.273	379.095	no MS2: 5_hydroxy_3_indole_acetic_acid	[2M-H]-	null	0.01	False	-1	379.094	C10H8NO3	Indole-3-acetic acid derivatives	DUUGKQCEGZLZNO-UHFFFAOYSA-M	C1=CC2=C(C=C1O)C(=CN2)CC(=O)[O-]	530	False	True	False	Normalized unit: Intensity; Annotation method: MSMS-Public_all-neg-VS19_1	False	False	331	0	0	0.98	-1	-1	-1	-1	-1	0.98	20.79	Plasma_017_neg_038	379.09540:862 380.10007:198 381.10473:0	null	0	0	0	0	0	0	441	523	514	1341	0	861	0	283	0
332	12.687	379.162	no MS2: (Z)-3-(4-hydroxyphenyl)-N-[4-[[(E)-3-(4-hydroxyphenyl)prop-2-enoyl]amino]butyl]prop-2-enamide	[M-H]-	null	0.84	False	-1	379.166	C22H24N2O4	Coumaric acids and derivatives	PYVBFDCHJDMSMM-MFUUIURDSA-N	OC(=NCCCCN=C(O)C=CC1=CC=C(O)C=C1)C=CC2=CC=C(O)C=C2	530	False	True	False	Normalized unit: Intensity; Annotation method: MSMS-Public_all-neg-VS19_1	False	False	332	0	0	1	-1	-1	-1	-1	-1	1	1281.33	QC_4-3_neg_058	379.16641:4265 380.17108:1255 381.17575:327	null	0	0	0	0	0	0	10843	6184	1019	2101	1916	4334	5923	25809	5692
333	9.267	379.213	no MS2: NCGC00380522-01_C20H30O4_1-Phenanthrenecarboxylic acid, 1,2,3,4,4a,4b,5,6,7,9,10,10a-dodecahydro-7-hydroxy-1,4a-dimethyl-7-(1-methylethyl)-9-oxo-	[M+HCOO]-	null	0.01	False	-1	379.213	C20H30O4	Diterpenoids	UFEHYRPBLFGEJW-UHFFFAOYSA-N	CC(C)C\1(O)CCC2\C(=C1)C(=O)CC3C2(C)CCCC3(C)C(O)=O	530	False	True	False	Normalized unit: Intensity; Annotation method: MSMS-Public_all-neg-VS19_1	False	False	333	0	0	1	-1	-1	-1	-1	-1	1	8.57	Plasma_008_neg_022	379.21259:780 380.21725:0 381.22192:0	null	0	0	0	0	0	0	0	0	0	0	0	0	0	2026	0
334	0.713	381.094	no MS2: 9-[[3-methyl-3-[(4-methyl-5-oxo-2H-furan-2-yl)methyl]oxiran-2-yl]methoxy]furo[3,2-g]chromen-7-one	[M-H]-	null	0.12	False	-1	381.098	C21H18O7	Psoralens	CISFAPDYRQPRCZ-UHFFFAOYSA-N	O=C1OC2=C(OCC3OC3(C)CC4OC(=O)C(=C4)C)C=5OC=CC5C=C2C=C1	530	False	True	False	Normalized unit: Intensity; Annotation method: MSMS-Public_all-neg-VS19_1	False	False	334	0	0	0.91	-1	-1	-1	-1	-1	0.91	798.92	Plasma_046_neg_078	381.09360:1069 382.09827:0 383.10293:4937	null	0	0	0	0	0	0	378	258	384	14	92	450	752	588	713
335	0.716	382.109	no MS2: 2-[[1-(4-nitrobenzoyl)pyrrolidine-2-carbonyl]amino]benzoic acid	[M-H]-	null	0.72	False	4.749	382.104	C19H17N3O6	Acylaminobenzoic acid and derivatives	IXQCQOLLSMIABK-UHFFFAOYSA-N	O=C(O)C=1C=CC=CC1N=C(O)C2N(C(=O)C3=CC=C(C=C3)N(=O)=O)CCC2	530	False	True	False	Normalized unit: Intensity; Annotation method: MSMS-Public_all-neg-VS19_1	False	False	335	0	0	1	-1	-1	-1	-1	-1	1	1037.96	Plasma_001_neg_014	382.10431:946 383.10898:3663 384.11364:504	null	0	0	0	0	0	0	1705	1306	1530	966	991	862	2222	1733	1493
336	0.716	383.109	no MS2: NCGC00380241-01!5-methyl-4-[(2S,3R,4S,5S,6R)-3,4,5-trihydroxy-6-(hydroxymethyl)oxan-2-yl]oxychromen-2-one	[M+HCOO]-	null	0.91	False	-1	383.098	C16H18O8	Coumarin glycosides	DXBGTODWNFZHCD-LMXXTMHSSA-N	CC1=C2C(O[C@@H]3O[C@H](CO)[C@@H](O)[C@H](O)[C@H]3O)=CC(=O)OC2=CC=C1	530	False	True	False	Normalized unit: Intensity; Annotation method: MSMS-Public_all-neg-VS19_1	False	False	336	0	0	0.98	-1	-1	-1	-1	-1	0.98	737.83	QC_1-1_neg_009	383.10031:3166 384.10498:488 385.10965:0	null	0	0	0	0	0	0	7174	5580	6241	4247	4405	3832	8773	6964	5927
337	6.712	383.209	Unknown	[M-H]-	null	0.01	False	null	null	null	null	null	null	999	False	False	False	Normalized unit: Intensity	False	False	337	0	0	null	null	null	null	null	null	null	26.83	Plasma_008_neg_022	383.20859:1952 384.21326:500 385.21792:461	null	0	0	0	0	0	0	148	432	173	155	0	20	822	3621	2311
338	0.667	384.725	Unknown	[M-H]-	null	0.01	False	null	null	null	null	null	null	999	False	False	False	Normalized unit: Intensity	False	False	338	0	0	null	null	null	null	null	null	null	801.44	Plasma_036_neg_066	384.72519:811 385.72986:0 386.73452:0	null	0	0	0	0	0	0	670	674	580	725	699	708	640	577	678
339	0.618	384.942	Unknown	[M-H]-	null	0.91	False	null	null	null	null	null	null	999	False	False	False	Normalized unit: Intensity	False	False	339	0	0	null	null	null	null	null	null	null	3811.16	Plasma_036_neg_066	384.94241:8495 385.94708:591 386.95175:0	null	267	291	185	516	296	316	15044	14924	14237	17168	17066	16439	16193	15399	16620
340	10.765	386.239	Unknown	[M-H]-	null	0.47	False	null	null	null	null	null	null	999	False	False	False	Normalized unit: Intensity	False	False	340	0	0	null	null	null	null	null	null	null	1530.46	Plasma_001_neg_014	386.23859:6493 387.24325:1568 388.24792:560	null	0	0	0	0	0	0	24775	1774	76	2435	56	557	1451	1022	2481
341	0.558	386.947	Unknown	[M-H]-	null	0.01	False	null	null	null	null	null	null	999	False	False	False	Normalized unit: Intensity	False	False	341	0	0	null	null	null	null	null	null	null	29.05	Plasma_034_neg_063	386.94659:902 387.95126:356 388.95593:468	null	0	0	0	0	0	0	96	431	790	62	19	52	33	17	241
342	0.808	387.114	no MS2: Coniferyl alcohol + O-Hex; PlaSMA ID-963	[M+HCOO]-	null	0.09	False	2.88	387.129	C16H22O8	Phenolic glycosides	SFLMUHDGSQZDOW-UHFFFAOYNA-N	OCC=CC2=CC=C(OC1OC(CO)C(O)C(O)C1(O))C(OC)=C2	530	False	True	False	Normalized unit: Intensity; Annotation method: MSMS-Public_all-neg-VS19_1	False	False	342	0	0	0.92	-1	-1	-1	-1	-1	0.92	503.64	Blind_17_neg_084	387.12491:1382 388.12958:0 389.13424:0	null	3182	3079	3052	4128	3257	3276	0	53	0	0	23	62	72	0	328
343	6.361	387.243	Unknown	[M-H]-	null	0.03	False	null	null	null	null	null	null	999	False	False	False	Normalized unit: Intensity	False	False	343	0	0	null	null	null	null	null	null	null	528.2	Plasma_030_neg_053	387.24329:1634 388.24795:467 389.25262:0	null	0	0	0	0	0	0	878	1206	1300	68	772	237	123	196	250
344	0.805	389.052	no MS2: Barbatolic acid	[M-H]-	null	0.91	False	-1	389.051	C18H14O10	p-Hydroxybenzoic acid alkyl esters	QAUIZXBSXBMGCF-UHFFFAOYSA-N	CC1=C(C(O)=C(C=O)C(O)=C1)C(OCC2=CC(O)=C(C=O)C(O)=C2C(O)=O)=O	530	False	True	False	Normalized unit: Intensity; Annotation method: MSMS-Public_all-neg-VS19_1	False	False	344	0	0	1	-1	-1	-1	-1	-1	1	3640.16	Plasma_001_neg_014	389.05139:68704 390.05606:9113 391.06073:5500	null	0	0	0	0	0	0	356012	376441	451888	258366	324512	235407	326328	333520	362435
345	1.082	389.057	no MS2: Barbatolic acid	[M-H]-	null	0.01	False	-1	389.051	C18H14O10	p-Hydroxybenzoic acid alkyl esters	QAUIZXBSXBMGCF-UHFFFAOYSA-N	CC1=C(C(O)=C(C=O)C(O)=C1)C(OCC2=CC(O)=C(C=O)C(O)=C2C(O)=O)=O	530	False	True	False	Normalized unit: Intensity; Annotation method: MSMS-Public_all-neg-VS19_1	False	False	345	0	0	0.86	-1	-1	-1	-1	-1	0.86	29.72	Plasma_029_neg_052	389.05701:2146 390.06167:242 391.06634:0	null	0	0	0	0	0	0	2334	3179	10253	4262	3247	2826	4011	3107	8780
346	3.728	389.101	no MS2: p_hydroxy_hippuric_acid	[2M-H]-	null	0.01	False	-1	389.099	C9H9NO4	Hippuric acids	ZMHLUFWWWPBTIU-UHFFFAOYSA-N	C1=CC(=CC=C1C(=O)NCC(=O)O)O	530	False	True	False	Normalized unit: Intensity; Annotation method: MSMS-Public_all-neg-VS19_1	False	False	346	0	0	0.98	-1	-1	-1	-1	-1	0.98	40.12	Plasma_007_neg_021	389.10080:1815 390.10547:422 391.11014:0	null	0	0	0	0	0	0	0	0	0	0	0	0	2556	0	0
347	0.804	389.167	no MS2: NCGC00385342-01!3-[3-[(2E)-3,7-dimethylocta-2,6-dienyl]-4-hydroxyphenyl]-7-hydroxychromen-4-one	[M-H]-	null	0.22	False	-1	389.176	C25H26O4	Isoflavones	ZBHUUXLHDOUMKM-REZTVBANSA-N	CC(C)=CCC\C(C)=C\CC1=CC(=CC=C1O)C2=COC3=CC(O)=CC=C3C2=O	530	False	True	False	Normalized unit: Intensity; Annotation method: MSMS-Public_all-neg-VS19_1	False	False	347	0	0	1	-1	-1	-1	-1	-1	1	1227.22	Plasma_039_neg_069	389.17581:3147 390.18048:0 391.18515:0	null	0	0	0	0	0	0	215	407	884	373	296	237	230	1137	318
348	9.603	389.271	no MS2: 2-acetoxy-6-pentadecylbenzoic acid	[M-H]-	null	0.78	False	-1	389.27	C24H38O4	Acylsalicylic acids	ZKWZWUUWZMUNAN-UHFFFAOYSA-N	CC(OC1=CC=CC(CCCCCCCCCCCCCCC)=C1C(O)=O)=O	530	False	True	False	Normalized unit: Intensity; Annotation method: MSMS-Public_all-neg-VS19_1	False	False	348	0	0	1	-1	-1	-1	-1	-1	1	1461.11	QC_4-1_neg_012	389.26981:2002 390.27447:510 391.27914:950	null	0	0	0	0	0	0	5587	8713	1849	3178	12674	1935	8556	4271	4034
349	8.861	389.271	no MS2: 2-acetoxy-6-pentadecylbenzoic acid	[M-H]-	null	0.09	False	-1	389.27	C24H38O4	Acylsalicylic acids	ZKWZWUUWZMUNAN-UHFFFAOYSA-N	CC(OC1=CC=CC(CCCCCCCCCCCCCCC)=C1C(O)=O)=O	530	False	True	False	Normalized unit: Intensity; Annotation method: MSMS-Public_all-neg-VS19_1	False	False	349	0	0	1	-1	-1	-1	-1	-1	1	1042.55	Plasma_007_neg_021	389.26971:806 390.27438:197 391.27905:0	null	0	0	0	0	0	0	1043	740	392	1013	4166	2502	1869	588	1873
350	9.1	389.272	no MS2: 2-acetoxy-6-pentadecylbenzoic acid	[M-H]-	null	0.81	False	-1	389.27	C24H38O4	Acylsalicylic acids	ZKWZWUUWZMUNAN-UHFFFAOYSA-N	CC(OC1=CC=CC(CCCCCCCCCCCCCCC)=C1C(O)=O)=O	530	False	True	False	Normalized unit: Intensity; Annotation method: MSMS-Public_all-neg-VS19_1	False	False	350	0	0	1	-1	-1	-1	-1	-1	1	1337.47	QC_2-1_neg_010	389.26981:1597 390.27447:376 391.27914:0	null	0	0	0	0	0	0	5922	6550	2865	4406	8240	2016	11442	2449	4560
351	0.631	390.884	Unknown	[M-H]-	null	0.25	False	null	null	null	null	null	null	999	False	False	False	Normalized unit: Intensity	False	False	351	0	0	null	null	null	null	null	null	null	837.04	Plasma_003_neg_016	390.88370:976 391.88837:0 392.89303:0	null	0	0	0	0	0	0	777	774	968	731	722	669	818	786	928
352	1.305	391.034	Unknown	[M-H]-	null	0.01	False	null	null	null	null	null	null	999	False	False	False	Normalized unit: Intensity	False	False	352	0	0	null	null	null	null	null	null	null	32.1	Plasma_003_neg_016	391.03439:1299 392.03906:186 393.04373:0	null	0	0	0	0	0	0	1090	807	4010	20	0	192	226	977	0
353	8.747	391.286	no MS2: Hyodeoxycholic acid	[M-H]-	null	0.87	False	1.573	391.285	C24H40O4	Dihydroxy bile acids, alcohols and derivatives	DGABKXLVXPYZII-CDONHWFASA-N	C[C@H](CCC(=O)O)[C@H]1CC[C@@H]2[C@@]1(CC[C@H]3[C@H]2C[C@@H](C4[C@@]3(CC[C@H](C4)O)C)O)C	530	False	True	False	Normalized unit: Intensity; Annotation method: MSMS-Public_all-neg-VS19_1	False	False	353	0	0	1	-1	-1	-1	-1	-1	1	3167.95	QC_1-1_neg_009	391.28531:3418 392.28998:819 393.29464:0	null	0	0	0	0	0	0	8083	11853	5967	9909	21385	5307	22467	5799	9829
354	9.555	391.289	no MS2: Hyodeoxycholic acid	[M-H]-	null	0.9	False	1.573	391.285	C24H40O4	Dihydroxy bile acids, alcohols and derivatives	DGABKXLVXPYZII-CDONHWFASA-N	C[C@H](CCC(=O)O)[C@H]1CC[C@@H]2[C@@]1(CC[C@H]3[C@H]2C[C@@H](C4[C@@]3(CC[C@H](C4)O)C)O)C	530	False	True	False	Normalized unit: Intensity; Annotation method: MSMS-Public_all-neg-VS19_1	False	False	354	0	0	1	-1	-1	-1	-1	-1	1	12523.1	QC_2-1_neg_010	391.28561:14626 392.29028:3601 393.29495:608	null	0	0	0	0	0	0	60981	68698	12092	19978	69867	13011	37175	43070	11414
355	8.65	391.291	no MS2: Hyodeoxycholic acid	[M-H]-	null	0.91	False	1.573	391.285	C24H40O4	Dihydroxy bile acids, alcohols and derivatives	DGABKXLVXPYZII-CDONHWFASA-N	C[C@H](CCC(=O)O)[C@H]1CC[C@@H]2[C@@]1(CC[C@H]3[C@H]2C[C@@H](C4[C@@]3(CC[C@H](C4)O)C)O)C	530	False	True	False	Normalized unit: Intensity; Annotation method: MSMS-Public_all-neg-VS19_1	False	False	355	0	0	1	-1	-1	-1	-1	-1	1	5068.62	Plasma_001_neg_014	391.28561:8794 392.29028:2284 393.29495:347	null	0	0	0	0	0	0	22253	20823	8623	14558	28712	9820	25784	7564	10017
356	8.393	391.292	no MS2: Hyodeoxycholic acid	[M-H]-	null	0.16	False	1.573	391.285	C24H40O4	Dihydroxy bile acids, alcohols and derivatives	DGABKXLVXPYZII-CDONHWFASA-N	C[C@H](CCC(=O)O)[C@H]1CC[C@@H]2[C@@]1(CC[C@H]3[C@H]2C[C@@H](C4[C@@]3(CC[C@H](C4)O)C)O)C	530	False	True	False	Normalized unit: Intensity; Annotation method: MSMS-Public_all-neg-VS19_1	False	False	356	0	0	1	-1	-1	-1	-1	-1	1	1201.42	Plasma_004_neg_017	391.28519:1294 392.28985:304 393.29452:0	null	0	0	0	0	0	0	1710	3077	1239	2724	4900	831	3760	2102	2033
357	9.557	391.39	Unknown	[M-H]-	null	0.01	False	null	null	null	null	null	null	999	False	False	False	Normalized unit: Intensity	False	False	357	0	0	null	null	null	null	null	null	null	1039.44	Plasma_016_neg_037	391.39001:1065 392.39468:134 393.39935:0	null	0	0	0	0	0	0	101	317	0	0	624	0	281	80	0
358	9.553	391.416	Unknown	[M-H]-	null	0.03	False	null	null	null	null	null	null	999	False	False	False	Normalized unit: Intensity	False	False	358	0	0	null	null	null	null	null	null	null	1404.91	Plasma_033_neg_062	391.41550:1465 392.42016:184 393.42483:0	null	0	0	0	0	0	0	90	233	0	0	295	0	35	229	0
359	5.143	393.073	no MS2: Diflufenican	[M-H]-	null	0.66	False	26.75	393.067	C19H11F5N2O2	Aromatic anilides	WYEHFWKAOXOVJD-UHFFFAOYSA-N	FC1=CC=C(NC(=O)C2=CC=CN=C2OC2=CC=CC(=C2)C(F)(F)F)C(F)=C1	530	False	True	False	Normalized unit: Intensity; Annotation method: MSMS-Public_all-neg-VS19_1	False	False	359	0	0	1	-1	-1	-1	-1	-1	1	61.66	Plasma_002_neg_015	393.06680:943 394.07147:177 395.07614:0	null	0	0	0	0	0	0	2717	1884	770	1690	0	3531	794	0	1366
360	10.52	393.14	no MS2: NCGC00160168-03!5,9,10-trihydroxy-2,2-dimethyl-12-(2-methylbut-3-en-2-yl)pyrano[3,2-b]xanthen-6-one	[M-H]-	null	0.01	False	-1	393.134	C23H22O6	Pyranoxanthones	XRVLGJCHUWXTDX-UHFFFAOYSA-N	CC(C)(C=C)C1=C2OC3=C(C=CC(O)=C3O)C(=O)C2=C(O)C4=C1OC(C)(C)C=C4	530	False	True	False	Normalized unit: Intensity; Annotation method: MSMS-Public_all-neg-VS19_1	False	False	360	0	0	0.84	-1	-1	-1	-1	-1	0.84	26.85	Plasma_008_neg_022	393.14029:1071 394.14496:316 395.14962:0	null	0	0	0	0	0	0	0	0	0	0	0	0	17	2064	58
361	10.24	395.156	no MS2: Cortisone	[M+Cl]-	null	0.03	False	3.46	395.162	C21H28O5	21-hydroxysteroids	MFYSYFVPBJMHGN-ZPOLXVRWSA-N	O=C1C=C2CCC3C(C(=O)CC4(C)C3CCC4(O)C(=O)CO)C2(C)CC1	530	False	True	False	Normalized unit: Intensity; Annotation method: MSMS-Public_all-neg-VS19_1	False	False	361	0	0	0.86	-1	-1	-1	-1	-1	0.86	440.68	Plasma_017_neg_038	395.15659:900 396.16125:228 397.16592:305	null	0	0	0	0	0	0	791	16	0	444	0	212	311	7068	1300
362	4.721	397.011	Unknown	[M-H]-	null	0.06	False	null	null	null	null	null	null	999	False	False	False	Normalized unit: Intensity	False	False	362	0	0	null	null	null	null	null	null	null	23.64	Plasma_030_neg_053	397.01080:1053 398.01547:184 399.02014:0	null	0	0	0	0	0	0	0	0	0	0	1937	0	0	0	2064
363	4.001	397.081	no MS2: Propoxycarbazone	[2M-H]-	null	0.91	False	10.186	397.082	C15H18N4O7S	Benzoic acid esters	JTHMVYBOQLDDIY-UHFFFAOYSA-N	CCCOC1=NN(C(=O)NS(=O)(=O)C2=CC=CC=C2C(=O)OC)C(=O)N1C	530	False	True	False	Normalized unit: Intensity; Annotation method: MSMS-Public_all-neg-VS19_1	False	False	363	0	0	1	-1	-1	-1	-1	-1	1	33.16	Plasma_042_neg_073	397.08221:1265 398.08688:263 399.09155:0	null	0	0	0	0	0	0	2814	2670	2710	2412	2628	2499	2506	2374	2628
364	10.235	397.156	no MS2: 2-amino-5-[2-[[(3S)-2,3-dihydroxy-2-[(1S)-1-hydroxyethyl]butanoyl]oxymethyl]anilino]-5-oxopentanoic acid	[M-H]-	null	0.01	False	0.801	397.162	C18H26N2O8	Glutamine and derivatives	NFINSJKQOBJWEB-WAQLSPKVSA-N	O=C(O)C(N)CCC(O)=NC=1C=CC=CC1COC(=O)C(O)(C(O)C)C(O)C	530	False	True	False	Normalized unit: Intensity; Annotation method: MSMS-Public_all-neg-VS19_1	False	False	364	0	0	0.86	-1	-1	-1	-1	-1	0.86	21.85	Plasma_008_neg_022	397.15619:1032 398.16086:0 399.16552:0	null	0	0	0	0	0	0	108	0	0	22	0	0	82	2706	495
365	7.012	397.229	Unknown	[M-H]-	null	0.01	False	null	null	null	null	null	null	999	False	False	False	Normalized unit: Intensity	False	False	365	0	0	null	null	null	null	null	null	null	1420.06	Plasma_044_neg_075	397.22910:1456 398.23376:323 399.23843:0	null	0	0	0	0	0	0	1707	542	518	717	371	473	3445	3506	3433
366	4	399.076	no MS2: kynurenic_acid	[2M-2H+Na]-	null	0.87	False	-1	399.06	C10H7NO3	Quinoline carboxylic acids	HCZHHEIFKROPDY-UHFFFAOYSA-N	C1=CC=C2C(=C1)C(=O)C=C(N2)C(=O)O	530	False	True	False	Normalized unit: Intensity; Annotation method: MSMS-Public_all-neg-VS19_1	False	False	366	0	0	0.63	-1	-1	-1	-1	-1	0.63	100.53	QC_3-1_neg_011	399.06949:955 400.07416:0 401.07882:0	null	0	0	0	0	0	0	1830	1654	1687	1635	1634	1685	1605	1532	1609
367	0.619	400.911	Unknown	[M-H]-	null	0.91	False	null	null	null	null	null	null	999	False	False	False	Normalized unit: Intensity	False	False	367	0	0	null	null	null	null	null	null	null	790.52	Plasma_008_neg_022	400.91141:2313 401.91608:0 402.92074:0	null	173	27	45	333	136	138	3903	3793	4208	4185	4207	4242	4165	4592	4009
368	0.757	401.959	Unknown	[M-H]-	null	0.22	False	null	null	null	null	null	null	999	False	False	False	Normalized unit: Intensity	False	False	368	0	0	null	null	null	null	null	null	null	872.39	Plasma_027_neg_050	401.95911:997 402.96377:0 403.96844:0	null	0	0	0	0	0	0	1180	1386	624	1770	1485	1777	1376	1236	847
369	6.133	402.251	Unknown	[M-H]-	null	0.01	False	null	null	null	null	null	null	999	False	False	False	Normalized unit: Intensity	False	False	369	0	0	null	null	null	null	null	null	null	1027.38	Plasma_008_neg_022	402.25119:1139 403.25586:0 404.26053:0	null	0	0	0	0	0	0	0	0	0	0	0	0	0	3433	0
370	5.933	402.252	Unknown	[M-H]-	null	0.01	False	null	null	null	null	null	null	999	False	False	False	Normalized unit: Intensity	False	False	370	0	0	null	null	null	null	null	null	null	917.31	Plasma_008_neg_022	402.25159:1022 403.25625:237 404.26092:0	null	0	0	0	0	0	0	0	0	0	0	0	0	0	2618	0
371	7.211	402.302	Unknown	[M-H]-	null	0.91	False	null	null	null	null	null	null	999	False	False	False	Normalized unit: Intensity	False	False	371	0	0	null	null	null	null	null	null	null	1191.4	Plasma_001_neg_014	402.30219:1337 403.30685:351 404.31152:0	null	0	0	0	0	0	0	3126	1476	3068	2819	2924	2907	2771	2712	2869
372	0.561	402.922	Unknown	[M-H]-	null	0.91	False	null	null	null	null	null	null	999	False	False	False	Normalized unit: Intensity	False	False	372	0	0	null	null	null	null	null	null	null	2155.71	Plasma_017_neg_038	402.92239:5191 403.92706:1738 404.93173:0	null	0	0	0	0	0	0	6560	8590	12099	5166	4546	6320	5995	5063	7374
373	8.937	403.218	no MS2: CORTISOL 21-ACETATE	[M-H]-	null	0.1	False	-1	403.213	C23H32O6	Gluco/mineralocorticoids, progestogins and derivatives	ALEXXDVDDISNDU-JZYPGELDSA-N	CC(=O)OCC(=O)[C@]1(CC[C@@H]2[C@@]1(C[C@@H]([C@H]3[C@H]2CCC4=CC(=O)CC[C@]34C)O)C)O	530	False	True	False	Normalized unit: Intensity; Annotation method: MSMS-Public_all-neg-VS19_1	False	False	373	0	0	1	-1	-1	-1	-1	-1	1	263.52	Plasma_016_neg_037	403.21320:880 404.21786:0 405.22253:0	null	0	0	0	0	0	0	509	663	13	200	115	769	158	2359	393
374	8.357	404.322	Unknown	[M-H]-	null	0.01	False	null	null	null	null	null	null	999	False	False	False	Normalized unit: Intensity	False	False	374	0	0	null	null	null	null	null	null	null	1139	Plasma_033_neg_062	404.32230:1167 405.32696:338 406.33163:0	null	0	0	0	0	0	0	0	16	0	0	959	0	0	0	0
375	0.561	404.921	no MS2: Arthothelin	[M+HCOO]-	null	0.68	False	-1	404.934	C14H7Cl3O5	Xanthones	NTAXLEHKEDVPRK-UHFFFAOYSA-N	Cc1cc(c(c2c1c(=O)c1c(o2)c(c(c(c1O)Cl)O)Cl)Cl)O	530	False	True	False	Normalized unit: Intensity; Annotation method: MSMS-Public_all-neg-VS19_1	False	False	375	0	0	0.77	-1	-1	-1	-1	-1	0.77	905.21	QC_3-4_neg_082	404.92679:1179 405.93146:0 406.93612:0	null	0	0	0	0	0	0	2291	3072	2061	1223	1539	2234	2166	1175	1407
376	9.228	404.974	no MS2: Diclazuril	[M-H]-	null	0.01	False	12.4	404.972	C17H9Cl3N4O2	Diphenylacetonitriles	ZSZFUDFOPOMEET-UHFFFAOYSA-N	C1=CC(=CC=C1C(C#N)C2=C(C=C(C=C2Cl)N3C(=O)NC(=O)C=N3)Cl)Cl	530	False	True	False	Normalized unit: Intensity; Annotation method: MSMS-Public_all-neg-VS19_1	False	False	376	0	0	0.98	-1	-1	-1	-1	-1	0.98	14.95	Plasma_021_neg_043	404.97391:924 405.97858:0 406.98324:911	null	0	0	0	0	0	0	18	17	0	0	0	43	82	761	39
377	1.3	405.03	no MS2: Unknown (carbon number 15); PlaSMA ID-1027	[M-H]-	null	0.31	False	2.8	405.048	C15H18O11S	Unknown	null	null	530	False	True	False	Normalized unit: Intensity; Annotation method: MSMS-Public_all-neg-VS19_1	False	False	377	0	0	0.66	-1	-1	-1	-1	-1	0.59	23.66	QC_4-4_neg_083	405.03891:1144 406.04358:0 407.04825:0	null	0	0	0	0	0	0	5529	4096	6693	560	397	443	577	2121	58
378	0.738	405.086	Unknown	[M-H]-	null	0.01	False	null	null	null	null	null	null	999	False	False	False	Normalized unit: Intensity	False	False	378	0	0	null	null	null	null	null	null	null	18.46	Plasma_009_neg_023	405.08609:883 406.09076:0 407.09543:0	null	0	0	0	0	0	0	614	386	435	77	0	0	825	169	1608
379	0.76	406.071	no MS2: PFSM-ammonio; [C10H20F5N2O5S2]+	[M-H]-	null	0.21	False	-1	406.066	C10H20F5N2O5S2	Organosulfonic acids and derivatives	GDVFZOZBFJNYEM-UHFFFAOYSA-O	O=S(=O)(O)CCC[N+](C)(C)CCCNS(=O)(=O)C(F)(F)C(F)(F)F	530	False	True	False	Normalized unit: Intensity; Annotation method: MSMS-Public_all-neg-VS19_1	False	False	379	0	0	1	-1	-1	-1	-1	-1	1	1305.58	Plasma_003_neg_016	406.06659:1113 407.07126:0 408.07592:0	null	0	0	0	0	0	0	806	2564	2372	305	752	33	3191	1045	3181
380	9.226	406.974	no MS2: PFCA-perfluoroalkyl_Hsubstituted_1DB; C9H2F14O2	[M-H]-	null	0.03	False	-1	406.976	C9H2F14O2	Medium-chain fatty acids	WGIXJOMRYLUUNW-UPHRSURJSA-N	O=C(O)C=C(F)C(F)(F)C(F)(F)C(F)(F)C(F)(F)C(F)(F)C(F)(F)F	530	False	True	False	Normalized unit: Intensity; Annotation method: MSMS-Public_all-neg-VS19_1	False	False	380	0	0	0.98	-1	-1	-1	-1	-1	0.98	22.47	Plasma_021_neg_043	406.97400:911 407.97867:0 408.98333:0	null	23	0	0	263	0	0	87	19	0	70	34	123	450	900	156
381	1.295	406.994	no MS2: PFCA-H; C9H5F13O3	[M-H]-	null	0.57	False	-1	406.996	C9H5F13O3	Carboxylic acids	DGYHPBHYCWLZNB-UHFFFAOYSA-N	O=C(O)COCC(F)(F)C(F)(F)C(F)(F)C(F)(F)C(F)(F)C(F)(F)F	530	False	True	False	Normalized unit: Intensity; Annotation method: MSMS-Public_all-neg-VS19_1	False	False	381	0	0	1	-1	-1	-1	-1	-1	1	121.81	QC_2-2_neg_033	406.99570:1703 408.00036:303 409.00503:0	null	0	0	0	0	0	0	9560	7909	13998	1424	832	1554	3885	4641	728
382	8.087	407.283	no MS2: Cholic acid	[M-H]-	null	0.91	False	2.115	407.28	C24H40O5	Trihydroxy bile acids, alcohols and derivatives	BHQCQFFYRZLCQQ-OELDTZBJSA-N	C[C@H](CCC(O)=O)[C@H]1CC[C@H]2[C@@H]3[C@H](O)C[C@@H]4C[C@H](O)CC[C@]4(C)[C@H]3C[C@H](O)[C@]12C	530	False	True	False	Normalized unit: Intensity; Annotation method: MSMS-Public_all-neg-VS19_1	False	False	382	0	0	1	-1	-1	-1	-1	-1	1	3724.55	QC_2-1_neg_010	407.28030:4186 408.28497:1031 409.28964:170	null	0	0	0	0	0	0	9092	9972	7831	7595	8639	8250	7154	11808	6564
383	6.563	407.286	no MS2: Cholic acid	[M-H]-	null	0.03	False	2.115	407.28	C24H40O5	Trihydroxy bile acids, alcohols and derivatives	BHQCQFFYRZLCQQ-OELDTZBJSA-N	C[C@H](CCC(O)=O)[C@H]1CC[C@H]2[C@@H]3[C@H](O)C[C@@H]4C[C@H](O)CC[C@]4(C)[C@H]3C[C@H](O)[C@]12C	530	False	True	False	Normalized unit: Intensity; Annotation method: MSMS-Public_all-neg-VS19_1	False	False	383	0	0	1	-1	-1	-1	-1	-1	1	14.38	Plasma_005_neg_018	407.28110:1417 408.28577:428 409.29043:0	null	0	0	0	0	0	0	665	127	0	61	2945	41	499	0	67
384	9.26	407.329	Unknown	[M-H]-	null	0.01	False	null	null	null	null	null	null	999	False	False	False	Normalized unit: Intensity	False	False	384	0	0	null	null	null	null	null	null	null	1785.25	Plasma_001_neg_014	407.32889:1899 408.33356:592 409.33822:0	null	0	0	0	0	0	0	4139	511	0	205	0	0	14	526	322
385	3.799	411.143	no MS2: NCGC00380168-01!3-[2-(2-hydroxy-4-methoxy-6-methylphenoxy)-4-methoxy-6-methylphenoxy]-5-methylbenzene-1,2-diol	[M-H]-	null	0.03	False	-1	411.145	C23H24O7	Diphenylethers	CGEQZXRFQKBBQJ-UHFFFAOYSA-N	COC1=CC(C)=C(OC2=CC(OC)=CC(C)=C2OC3=CC(C)=CC(O)=C3O)C(O)=C1	530	False	True	False	Normalized unit: Intensity; Annotation method: MSMS-Public_all-neg-VS19_1	False	False	385	0	0	1	-1	-1	-1	-1	-1	1	25.79	Plasma_012_neg_027	411.14481:1226 412.14947:0 413.15414:0	null	0	0	0	0	0	0	270	391	355	0	0	3500	0	0	0
386	0.561	418.896	Unknown	[M-H]-	null	0.91	False	null	null	null	null	null	null	999	False	False	False	Normalized unit: Intensity	False	False	386	0	0	null	null	null	null	null	null	null	6314.25	Plasma_002_neg_015	418.89600:8340 419.90066:1680 420.90533:0	null	0	0	0	0	0	0	19446	20784	20636	7378	15400	18053	17540	17235	17917
387	0.56	420.896	no MS2: Benzbromarone	[M-H]-	null	0.81	False	1	420.908	C17H12Br2O3	Aryl-phenylketones	WHQCHUCQKNIQEC-UHFFFAOYSA-N	O=C(C1=CC(Br)=C(O)C(Br)=C1)C=2C=3C=CC=CC3OC2CC	530	False	True	False	Normalized unit: Intensity; Annotation method: MSMS-Public_all-neg-VS19_1	False	False	387	0	0	0.86	-1	-1	-1	-1	-1	0.86	1423.54	QC_2-3_neg_056	420.90250:1342 421.90716:0 422.91183:0	null	0	0	0	0	0	0	2460	4107	3998	2981	2971	3526	3460	3322	1665
388	0.726	421.041	Unknown	[M-H]-	null	0.03	False	null	null	null	null	null	null	999	False	False	False	Normalized unit: Intensity	False	False	388	0	0	null	null	null	null	null	null	null	44.8	Plasma_020_neg_041	421.04111:1864 422.04577:0 423.05044:0	null	0	0	0	0	0	0	20	251	32	0	19	1961	1477	356	1951
389	0.737	421.068	no MS2: Trehalose-6-phosphate	[M+K-2H]-	null	0.4	False	9.708	421.075	C12H23O14P	Disaccharide phosphates	LABSPYBHMPDTEL-LIZSDCNHSA-N	O=P(O)(O)OCC1OC(OC2OC(CO)C(O)C(O)C2O)C(O)C(O)C1O	530	False	True	False	Normalized unit: Intensity; Annotation method: MSMS-Public_all-neg-VS19_1	False	False	389	0	0	1	-1	-1	-1	-1	-1	1	41.55	QC_2-4_neg_081	421.07541:1159 422.08008:0 423.08474:0	null	0	0	0	0	0	0	98	0	0	0	42	627	4455	1744	6297
390	0.726	423.039	no MS2: THIAMINE PYROPHOSPHATE	[M-H]-	null	0.22	False	-1	423.03	C12H18N4O7P2S	Thiamine phosphates	AYEKOFBPNLCAJY-UHFFFAOYSA-N	CC1=C(SC=[N+]1CC2=CN=C(N=C2N)C)CCO[P@@](O)(OP([O-])(O)=O)=O	530	False	True	False	Normalized unit: Intensity; Annotation method: MSMS-Public_all-neg-VS19_1	False	False	390	0	0	0.91	-1	-1	-1	-1	-1	0.91	31.02	Plasma_006_neg_020	423.03430:914 424.03897:0 425.04364:0	null	0	0	0	0	0	0	38	251	31	20	369	1932	985	121	2444
391	0.582	424.916	Unknown	[M-H]-	null	0.91	False	null	null	null	null	null	null	999	False	False	False	Normalized unit: Intensity	False	False	391	0	0	null	null	null	null	null	null	null	688.72	Plasma_017_neg_038	424.91641:2027 425.92108:395 426.92575:0	null	0	0	0	0	0	0	1206	1338	1436	934	845	1065	1075	971	1099
392	9.552	427.266	Unknown	[M-H]-	null	0.04	False	null	null	null	null	null	null	999	False	False	False	Normalized unit: Intensity	False	False	392	0	0	null	null	null	null	null	null	null	909.88	Plasma_016_neg_037	427.26611:994 428.27078:261 429.27545:0	null	0	0	0	0	0	0	1056	1363	0	22	1500	0	513	315	0
393	8.32	427.33	no MS2: (1S,2R,5R,6R,10R,13S,15S)-5-[(2R,3E,5R)-5,6-dimethylhept-3-en-2-yl]-6,10-dimethyl-16,17-dioxapentacyclo[13.2.2.0?,?.0?,?.0??,??]nonadec-18-en-13-ol	[M-H]-	null	0.01	False	-1	427.322	C28H44O3	Ergostane steroids	VXOZCESVZIRHCJ-LNSUSAKYSA-N	OC1CCC2(C)C3CCC4(C)C(CCC4C53OOC2(C=C5)C1)C(C=CC(C)C(C)C)C	530	False	True	False	Normalized unit: Intensity; Annotation method: MSMS-Public_all-neg-VS19_1	False	False	393	0	0	0.72	-1	-1	-1	-1	-1	0.72	1138.69	Plasma_046_neg_078	427.32990:1229 428.33456:316 429.33923:0	null	0	0	0	0	0	0	20	1833	0	0	0	1665	0	711	0
394	7.388	428.23	no MS2: NCGC00381123-01_C25H35NO5_Spiro[2H-furo[2,3-e]isoindole-2,1'(2'H)-naphthalen]-6(3H)-one, 3',4',4'a,5',6',7,7',8,8',8'a-decahydro-4,6'-dihydroxy-7-(2-hydroxyethyl)-2',5',5',8'a-tetramethyl-, (2R,2'R,6'R,8a'S)-	[M-H]-	null	0.03	False	-1	428.244	C25H35NO5	Isoindolones	ZHECNBLIOXZXBL-TVDJWTRXSA-N	C[C@@H]1CCC2C(C)(C)[C@H](O)CC[C@]2(C)[C@@]13CC4=C(O3)C5=C(C=C4O)C(=O)N(CCO)C5	530	False	True	False	Normalized unit: Intensity; Annotation method: MSMS-Public_all-neg-VS19_1	False	False	394	0	0	0.78	-1	-1	-1	-1	-1	0.78	2566.06	Plasma_045_neg_076	428.23709:1055 429.24176:234 430.24643:0	null	0	0	0	0	0	0	0	0	0	0	0	0	366	12838	98
395	4.18	430.894	no MS2: PFSA-Cl; C6HClF12O4S	[M-H]-	null	0.01	False	-1	430.902	C6HClF12O4S	Organosulfonic acids	ZZYPOSNUZDGULH-UHFFFAOYSA-N	O=S(=O)(O)C(F)(F)C(F)(F)C(F)(F)C(F)(F)OC(F)(F)C(F)(F)Cl	530	False	True	False	Normalized unit: Intensity; Annotation method: MSMS-Public_all-neg-VS19_1	False	False	395	0	0	0.72	-1	-1	-1	-1	-1	0.72	1244.06	Plasma_030_neg_053	430.89389:1426 431.89856:0 432.90323:0	null	0	0	0	0	0	0	0	0	0	0	0	0	0	0	0
396	0.59	430.934	no MS2: PFSA-ether; C6HF13O5S	[M-H]-	null	0.69	False	-1	430.926	C6HF13O5S	Organosulfonic acids	NKKFJSGYALGMHM-UHFFFAOYSA-N	O=S(=O)(O)C(F)(F)C(F)(F)C(F)(F)C(F)(F)OC(F)(F)OC(F)(F)F	530	False	True	False	Normalized unit: Intensity; Annotation method: MSMS-Public_all-neg-VS19_1	False	False	396	0	0	0.99	-1	-1	-1	-1	-1	0.99	458.45	Plasma_001_neg_014	430.92789:896 431.93255:0 432.93722:0	null	0	0	0	0	0	0	1026	1190	1462	827	820	1017	963	800	1090
397	9.617	432.319	no MS2: glycolithocholic acid	[M-H]-	null	0.06	False	-1	432.312	C26H43NO4	Glycinated bile acids and derivatives	XBSQTYHEGZTYJE-REPOFGKESA-N	C[C@H](CCC(=O)NCC(=O)O)[C@H]1CC[C@@H]2[C@@]1(CC[C@H]3[C@H]2CC[C@H]4[C@@]3(CC[C@H](C4)O)C)C	530	False	True	False	Normalized unit: Intensity; Annotation method: MSMS-Public_all-neg-VS19_1	False	False	397	0	0	1	-1	-1	-1	-1	-1	1	5311.84	Plasma_005_neg_018	432.31259:2936 433.31726:899 434.32193:0	null	0	0	0	0	0	0	336	0	0	0	7122	0	1869	0	0
398	9.605	432.432	Unknown	[M-H]-	null	0.01	False	null	null	null	null	null	null	999	False	False	False	Normalized unit: Intensity	False	False	398	0	0	null	null	null	null	null	null	null	857.25	Plasma_033_neg_062	432.43170:1071 433.43637:0 434.44104:0	null	0	0	0	0	0	0	0	0	0	0	0	0	0	0	0
399	0.635	432.873	Unknown	[M-H]-	null	0.91	False	null	null	null	null	null	null	999	False	False	False	Normalized unit: Intensity	False	False	399	0	0	null	null	null	null	null	null	null	960.07	Plasma_036_neg_066	432.87289:1320 433.87756:0 434.88223:0	null	0	0	0	0	0	0	782	805	697	849	888	856	863	771	885
400	0.561	434.879	Unknown	[M-H]-	null	0.91	False	null	null	null	null	null	null	999	False	False	False	Normalized unit: Intensity	False	False	400	0	0	null	null	null	null	null	null	null	5572.91	Plasma_025_neg_047	434.87900:8623 435.88367:707 436.88833:402	null	0	0	0	0	0	0	21152	18322	13403	15997	18839	18812	18971	21277	11122
401	9.617	435.276	Unknown	[M-H]-	null	0.01	False	null	null	null	null	null	null	999	False	False	False	Normalized unit: Intensity	False	False	401	0	0	null	null	null	null	null	null	null	809.69	Plasma_005_neg_018	435.27560:835 436.28027:219 437.28494:0	null	0	0	0	0	0	0	717	1239	0	161	1831	0	1111	453	382
402	9.115	435.276	Unknown	[M-H]-	null	0.01	False	null	null	null	null	null	null	999	False	False	False	Normalized unit: Intensity	False	False	402	0	0	null	null	null	null	null	null	null	862.88	Plasma_007_neg_021	435.27591:867 436.28058:264 437.28524:0	null	0	0	0	0	0	0	446	1072	140	572	1416	20	1990	87	714
403	1.303	435.959	Unknown	[M-H]-	null	0.25	False	null	null	null	null	null	null	999	False	False	False	Normalized unit: Intensity	False	False	403	0	0	null	null	null	null	null	null	null	1060.06	Plasma_003_neg_016	435.95950:1728 436.96417:776 437.96884:0	null	0	0	0	0	0	0	4598	3196	5412	514	144	356	1539	2577	63
404	0.728	437.105	no MS2: NCGC00385022-01![3-hydroxy-4-[(2S,3R,4S,5S,6R)-3,4,5-trihydroxy-6-(hydroxymethyl)oxan-2-yl]oxyphenyl]methyl 3,4-dihydroxybenzoate	[2M+FA-H]-	null	0.01	False	-1	437.109	C20H22O11	Phenolic glycosides	MFOVLHFTNQGRLH-BFMVXSJESA-N	OC[C@H]1O[C@@H](OC2=C(O)C=C(COC(=O)C3=CC=C(O)C(O)=C3)C=C2)[C@H](O)[C@@H](O)[C@@H]1O	530	False	True	False	Normalized unit: Intensity; Annotation method: MSMS-Public_all-neg-VS19_1	False	False	404	0	0	0.91	-1	-1	-1	-1	-1	0.91	19.48	Plasma_044_neg_075	437.10471:977 438.10937:0 439.11404:0	null	0	0	0	0	0	0	0	0	0	0	0	0	0	0	0
405	8.747	437.292	Unknown	[M-H]-	null	0.18	False	null	null	null	null	null	null	999	False	False	False	Normalized unit: Intensity	False	False	405	0	0	null	null	null	null	null	null	null	1172.7	Plasma_007_neg_021	437.29199:1956 438.29666:481 439.30133:0	null	0	0	0	0	0	0	897	2206	452	1906	4237	879	4547	1086	1815
406	9.555	437.295	Unknown	[M-H]-	null	0.9	False	null	null	null	null	null	null	999	False	False	False	Normalized unit: Intensity	False	False	406	0	0	null	null	null	null	null	null	null	4568.01	Plasma_016_neg_037	437.29459:13497 438.29925:3691 439.30392:726	null	0	0	0	0	0	0	22407	25195	4558	7571	25407	5035	14006	16089	4209
407	8.65	437.298	Unknown	[M-H]-	null	0.88	False	null	null	null	null	null	null	999	False	False	False	Normalized unit: Intensity	False	False	407	0	0	null	null	null	null	null	null	null	2586.99	Plasma_033_neg_062	437.29819:5464 438.30286:1634 439.30752:0	null	0	0	0	0	0	0	10829	9796	3995	6925	13114	4419	11579	3572	4442
408	0.74	439.086	Unknown	[M-H]-	null	0.74	False	null	null	null	null	null	null	999	False	False	False	Normalized unit: Intensity	False	False	408	0	0	null	null	null	null	null	null	null	63.35	Plasma_013_neg_028	439.08569:4226 440.09036:642 441.09503:272	null	0	0	0	0	0	0	2018	2750	1710	844	2270	3288	9395	4642	9524
409	0.582	440.895	Unknown	[M-H]-	null	0.91	False	null	null	null	null	null	null	999	False	False	False	Normalized unit: Intensity	False	False	409	0	0	null	null	null	null	null	null	null	2299.51	Plasma_018_neg_039	440.89529:3366 441.89996:0 442.90463:0	null	0	0	0	0	0	0	2327	2190	1811	1842	1999	2166	2023	2183	1839
410	0.666	442.685	Unknown	[M-H]-	null	0.85	False	null	null	null	null	null	null	999	False	False	False	Normalized unit: Intensity	False	False	410	0	0	null	null	null	null	null	null	null	905.12	Plasma_036_neg_066	442.68451:1307 443.68918:0 444.69384:0	null	0	0	0	0	0	0	938	956	803	977	957	961	902	808	862
411	0.63	442.898	Unknown	[M-H]-	null	0.91	False	null	null	null	null	null	null	999	False	False	False	Normalized unit: Intensity	False	False	411	0	0	null	null	null	null	null	null	null	1986.65	Plasma_016_neg_037	442.89810:2612 443.90277:214 444.90744:0	null	0	0	0	0	0	0	1564	1564	1410	1787	1741	1727	1678	1549	1722
412	0.666	444.683	Unknown	[M-H]-	null	0.91	False	null	null	null	null	null	null	999	False	False	False	Normalized unit: Intensity	False	False	412	0	0	null	null	null	null	null	null	null	991.35	Plasma_036_neg_066	444.68259:1303 445.68725:0 446.69192:0	null	0	0	0	0	0	0	1020	1165	914	1095	1117	1151	980	873	1014
413	0.63	444.897	Unknown	[M-H]-	null	0.03	False	null	null	null	null	null	null	999	False	False	False	Normalized unit: Intensity	False	False	413	0	0	null	null	null	null	null	null	null	806.84	Plasma_022_neg_044	444.89661:966 445.90127:0 446.90594:0	null	0	0	0	0	0	0	508	501	494	521	563	556	596	477	571
414	7.762	446.291	Unknown	[M-H]-	null	0.04	False	null	null	null	null	null	null	999	False	False	False	Normalized unit: Intensity	False	False	414	0	0	null	null	null	null	null	null	null	946	Plasma_005_neg_018	446.29111:1250 447.29577:364 448.30044:0	null	0	0	0	0	0	0	0	0	0	0	2533	0	555	0	0
415	7.958	446.297	Unknown	[M-H]-	null	0.01	False	null	null	null	null	null	null	999	False	False	False	Normalized unit: Intensity	False	False	415	0	0	null	null	null	null	null	null	null	946.56	Plasma_033_neg_062	446.29721:978 447.30188:235 448.30655:0	null	0	0	0	0	0	0	0	0	0	0	153	0	14	0	0
416	8.375	446.298	Unknown	[M-H]-	null	0.06	False	null	null	null	null	null	null	999	False	False	False	Normalized unit: Intensity	False	False	416	0	0	null	null	null	null	null	null	null	1448.56	Plasma_033_neg_062	446.29840:2904 447.30307:949 448.30774:149547	null	0	0	0	0	0	0	1786	2536	0	36	2168	0	2334	0	0
417	0.59	446.913	Unknown	[M-H]-	null	0.91	False	null	null	null	null	null	null	999	False	False	False	Normalized unit: Intensity	False	False	417	0	0	null	null	null	null	null	null	null	2220.91	Plasma_028_neg_051	446.91309:3096 447.91775:362 448.92242:0	null	0	0	0	0	0	0	4047	3924	3447	3456	3730	3767	3658	3723	3396
418	0.918	447.1	no MS2: Maritimetin-6-O-glucoside; PlaSMA ID-1194	[M-H]-	null	0.01	False	4	447.093	C21H20O11	Arylbenzofuran flavonoids	SYRURBPRFQUYQS-UHFFFAOYNA-N	OCC1OC(OC2=C(O)C3=C(C=C2)C(=O)C(O3)=CC2=CC=C(O)C(O)=C2)C(O)C(O)C1O	530	False	True	False	Normalized unit: Intensity; Annotation method: MSMS-Public_all-neg-VS19_1	False	False	418	0	0	0.81	-1	-1	-1	-1	-1	0.81	92.32	Plasma_030_neg_053	447.09970:3395 448.10437:436 449.10904:215	null	0	0	0	0	0	0	23	22	0	0	0	0	0	0	0
419	8.37	448.313	no MS2: GLYCOCHENODEOXYCHOLATE	[M-H]-	null	0.9	False	-1	448.307	C26H43NO5	Glycinated bile acids and derivatives	GHCZAUBVMUEKKP-UHFFFAOYSA-N	CC(CCC(=O)NCC(=O)O)C1CCC2C1(CCC3C2C(CC4C3(CCC(C4)O)C)O)C	530	False	True	False	Normalized unit: Intensity; Annotation method: MSMS-Public_all-neg-VS19_1	False	False	419	0	0	1	-1	-1	-1	-1	-1	1	7898.73	QC_2-1_neg_010	448.30670:15122 449.31137:10541 450.31604:2511	null	0	0	0	0	0	0	51852	53915	6467	14650	204773	5140	68643	11909	5905
420	7.623	448.314	no MS2: GLYCOCHENODEOXYCHOLATE	[M-H]-	null	0.04	False	-1	448.307	C26H43NO5	Glycinated bile acids and derivatives	GHCZAUBVMUEKKP-UHFFFAOYSA-N	CC(CCC(=O)NCC(=O)O)C1CCC2C1(CCC3C2C(CC4C3(CCC(C4)O)C)O)C	530	False	True	False	Normalized unit: Intensity; Annotation method: MSMS-Public_all-neg-VS19_1	False	False	420	0	0	0.99	-1	-1	-1	-1	-1	0.99	25.04	Plasma_005_neg_018	448.30850:1370 449.31317:358 450.31784:0	null	0	0	0	0	0	0	866	970	0	85	3000	0	971	0	10
421	8.368	448.441	Unknown	[M-H]-	null	0.01	False	null	null	null	null	null	null	999	False	False	False	Normalized unit: Intensity	False	False	421	0	0	null	null	null	null	null	null	null	1578.88	Plasma_030_neg_053	448.44061:6002 449.44528:2294 450.44995:0	null	0	0	0	0	0	0	203	359	0	0	755	0	196	0	0
422	8.374	448.46	Unknown	[M-H]-	null	0.03	False	null	null	null	null	null	null	999	False	False	False	Normalized unit: Intensity	False	False	422	0	0	null	null	null	null	null	null	null	2638.03	Plasma_033_neg_062	448.45981:4983 449.46448:0 450.46914:327	null	0	0	0	0	0	0	22	77	0	0	1350	0	124	0	0
423	8.18	449.311	Unknown	[M-H]-	null	0.26	False	null	null	null	null	null	null	999	False	False	False	Normalized unit: Intensity	False	False	423	0	0	null	null	null	null	null	null	null	869.09	Plasma_005_neg_018	449.31131:1093 450.31598:309 451.32065:0	null	0	0	0	0	0	0	2033	1976	1839	964	2396	1767	1701	1603	1612
424	8.363	449.437	Unknown	[M-H]-	null	0.01	False	null	null	null	null	null	null	999	False	False	False	Normalized unit: Intensity	False	False	421	1	0	null	null	null	null	null	null	null	2502.19	Plasma_033_neg_062	449.43680:4228 450.44147:336 451.44613:0	null	0	0	0	0	0	0	0	39	0	0	130	0	46	0	0
425	9.261	450.269	Unknown	[M-H]-	null	0.04	False	null	null	null	null	null	null	999	False	False	False	Normalized unit: Intensity	False	False	425	0	0	null	null	null	null	null	null	null	1083.15	Plasma_033_neg_062	450.26920:1399 451.27386:413 452.27853:0	null	0	0	0	0	0	0	518	18	0	129	453	0	2398	2500	1182
426	8.974	452.28	no MS2: Phosphatidylethanolamine lyso 16:0	[M-H]-	null	0.03	False	2.63	452.278	C21H44NO7P	2-acyl-sn-glycero-3-phosphoethanolamines	CKPBBEOJHAPPBT-UHFFFAOYSA-N	CCCCCCCCCCCCCCCC(=O)OC(CO)COP(O)(=O)OCCN	530	False	True	False	Normalized unit: Intensity; Annotation method: MSMS-Public_all-neg-VS19_1	False	False	426	0	0	0.99	-1	-1	-1	-1	-1	0.99	1237.69	Plasma_008_neg_022	452.27991:1314 453.28457:267 454.28924:0	null	0	0	0	0	0	0	99	24	0	20	41	16	1162	3265	697
427	10.016	452.281	no MS2: Phosphatidylethanolamine lyso 16:0	[M-H]-	null	0.84	False	2.63	452.278	C21H44NO7P	2-acyl-sn-glycero-3-phosphoethanolamines	CKPBBEOJHAPPBT-UHFFFAOYSA-N	CCCCCCCCCCCCCCCC(=O)OC(CO)COP(O)(=O)OCCN	530	False	True	False	Normalized unit: Intensity; Annotation method: MSMS-Public_all-neg-VS19_1	False	False	427	0	0	1	-1	-1	-1	-1	-1	1	3954.05	QC_2-1_neg_010	452.27841:4504 453.28308:1136 454.28775:228	null	0	0	0	0	0	0	10185	4205	944	3529	8023	3720	25436	38462	20980
428	7.264	452.302	Unknown	[M-H]-	null	0.9	False	null	null	null	null	null	null	999	False	False	False	Normalized unit: Intensity	False	False	428	0	0	null	null	null	null	null	null	null	1115.77	Plasma_001_neg_014	452.30161:1457 453.30627:415 454.31094:0	null	0	0	0	0	0	0	2586	2471	2385	2380	2422	2426	2202	1951	2283
429	0.618	452.931	Unknown	[M-H]-	null	0.91	False	null	null	null	null	null	null	999	False	False	False	Normalized unit: Intensity	False	False	429	0	0	null	null	null	null	null	null	null	1695.4	Plasma_036_neg_066	452.93121:9943 453.93588:896 454.94055:0	null	75	50	68	289	42	99	16427	16163	14990	18986	18872	17777	17665	16321	18014
430	8.087	453.288	no MS2: NCGC00380550-01_C24H40O5_4-{[5-(6-Hydroxy-5,5,8a-trimethyl-2-methylenedecahydro-1-naphthalenyl)-3-methylpentyl]oxy}-4-oxobutanoic acid	[M+HCOO]-	null	0.91	False	-1	453.286	C24H40O5	Diterpenoids	PEFFBGFCZXFQSX-UHFFFAOYSA-N	CC(CCOC(=O)CCC(O)=O)CCC1C(=C)CCC2C(C)(C)C(O)CCC12C	530	False	True	False	Normalized unit: Intensity; Annotation method: MSMS-Public_all-neg-VS19_1	False	False	430	0	0	1	-1	-1	-1	-1	-1	1	1910.89	QC_4-1_neg_012	453.28571:2294 454.29037:662 455.29504:0	null	0	0	0	0	0	0	4721	5229	4124	3836	4533	4287	3682	6138	3463
431	10.557	453.309	Unknown	[M-H]-	null	0.03	False	null	null	null	null	null	null	999	False	False	False	Normalized unit: Intensity	False	False	431	0	0	null	null	null	null	null	null	null	849.78	Plasma_041_neg_072	453.30899:847 454.31366:295 455.31833:0	null	0	0	0	0	0	0	0	45	0	0	0	798	22	120	0
432	10.275	455.325	Unknown	[M-H]-	null	0.01	False	null	null	null	null	null	null	999	False	False	False	Normalized unit: Intensity	False	False	432	0	0	null	null	null	null	null	null	null	868.13	Plasma_041_neg_072	455.32489:908 456.32956:313 457.33423:0	null	0	0	0	0	0	0	438	868	0	0	0	604	578	1271	23
433	4.63	456.211	Unknown	[M-H]-	null	0.01	False	null	null	null	null	null	null	999	False	False	False	Normalized unit: Intensity	False	False	433	0	0	null	null	null	null	null	null	null	908.06	Plasma_045_neg_076	456.21100:986 457.21567:0 458.22033:0	null	0	0	0	0	0	0	199	0	107	0	0	0	127	32	45
434	8.634	457.339	no MS2: Smilagenin Acetate	[M-H]-	null	0.04	False	-1	457.332	C29H46O4	Triterpenoids	LVRAKYNQYKVPIK-OZPQTLBISA-N	O=C(OC1CCC2(C)C(CCC3C2CCC4(C)C3CC5OC6(OCC(C)CC6)C(C)C54)C1)C	530	False	True	False	Normalized unit: Intensity; Annotation method: MSMS-Public_all-neg-VS19_1	False	False	434	0	0	0.99	-1	-1	-1	-1	-1	0.99	1019.67	Plasma_015_neg_030	457.33401:1049 458.33868:346 459.34335:0	null	0	0	0	0	0	0	0	0	0	0	0	75	0	0	0
435	10.852	457.341	no MS2: Smilagenin Acetate	[M-H]-	null	0.41	False	-1	457.332	C29H46O4	Triterpenoids	LVRAKYNQYKVPIK-OZPQTLBISA-N	O=C(OC1CCC2(C)C(CCC3C2CCC4(C)C3CC5OC6(OCC(C)CC6)C(C)C54)C1)C	530	False	True	False	Normalized unit: Intensity; Annotation method: MSMS-Public_all-neg-VS19_1	False	False	435	0	0	1	-1	-1	-1	-1	-1	1	995.99	QC_2-1_neg_010	457.33331:959 458.33798:279 459.34265:0	null	0	0	0	0	0	0	657	1181	0	16	0	617	191	2709	0
436	0.882	458.118	Unknown	[M-H]-	null	0.49	False	null	null	null	null	null	null	999	False	False	False	Normalized unit: Intensity	False	False	436	0	0	null	null	null	null	null	null	null	951.17	Plasma_045_neg_076	458.11810:1655 459.12277:261 460.12744:0	null	0	0	0	0	0	0	1299	532	444	1453	2302	2702	1073	1542	426
437	0.665	458.656	Unknown	[M-H]-	null	0.91	False	null	null	null	null	null	null	999	False	False	False	Normalized unit: Intensity	False	False	437	0	0	null	null	null	null	null	null	null	1010.39	Plasma_017_neg_038	458.65601:1225 459.66067:0 460.66534:0	null	0	0	0	0	0	0	1096	1150	1134	1082	1142	1175	1012	1039	921
438	0.63	458.872	Unknown	[M-H]-	null	0.91	False	null	null	null	null	null	null	999	False	False	False	Normalized unit: Intensity	False	False	438	0	0	null	null	null	null	null	null	null	1178.9	Plasma_008_neg_022	458.87149:1533 459.87616:0 460.88083:0	null	0	0	0	0	0	0	1139	1141	1271	1028	1100	1024	1150	1203	1193
439	9.556	459.277	no MS2: Lucidenic acid N	[M-H]-	null	0.51	False	-1	459.275	C27H40O6	Triterpenoids	YBGBNHHXOJXFNM-UQCMLMITSA-N	O=C(O)CCC(C)C1CC(=O)C2(C3=C(C(=O)CC12C)C4(C)CCC(O)C(C)(C)C4CC3O)C	530	False	True	False	Normalized unit: Intensity; Annotation method: MSMS-Public_all-neg-VS19_1	False	False	439	0	0	1	-1	-1	-1	-1	-1	1	1151.55	Plasma_008_neg_022	459.27539:1130 460.28006:217 461.28473:0	null	0	0	0	0	0	0	4155	4512	1062	1735	2347	1085	2890	3095	832
440	8.651	459.281	no MS2: Lucidenic acid N	[M-H]-	null	0.07	False	-1	459.275	C27H40O6	Triterpenoids	YBGBNHHXOJXFNM-UQCMLMITSA-N	O=C(O)CCC(C)C1CC(=O)C2(C3=C(C(=O)CC12C)C4(C)CCC(O)C(C)(C)C4CC3O)C	530	False	True	False	Normalized unit: Intensity; Annotation method: MSMS-Public_all-neg-VS19_1	False	False	440	0	0	1	-1	-1	-1	-1	-1	1	932.56	Plasma_013_neg_028	459.27551:946 460.28018:204 461.28485:0	null	0	0	0	0	0	0	1896	762	629	819	2420	223	2111	106	598
441	0.665	460.654	Unknown	[M-H]-	null	0.91	False	null	null	null	null	null	null	999	False	False	False	Normalized unit: Intensity	False	False	441	0	0	null	null	null	null	null	null	null	1190.41	Plasma_022_neg_044	460.65350:1461 461.65817:0 462.66284:0	null	0	0	0	0	0	0	1341	1391	1348	1334	1318	1389	1267	1219	1217
442	0.665	462.649	Unknown	[M-H]-	null	0.28	False	null	null	null	null	null	null	999	False	False	False	Normalized unit: Intensity	False	False	442	0	0	null	null	null	null	null	null	null	817.54	QC_3-2_neg_034	462.64941:983 463.65408:0 464.65875:0	null	0	0	0	0	0	0	848	911	875	838	843	831	741	790	708
443	7.141	463.296	no MS2: Pristimerin	[M-H]-	null	0.74	False	-1	463.285	C30H40O4	Triterpenoids	JFACETXYABVHFD-WXPPGMDDSA-N	O=C1C=C2C(=CC=C3C2(C)CCC4(C)C5CC(C(=O)OC)(C)CCC5(C)CCC34C)C(=C1O)C	530	False	True	False	Normalized unit: Intensity; Annotation method: MSMS-Public_all-neg-VS19_1	False	False	443	0	0	0.95	-1	-1	-1	-1	-1	0.95	1124.15	QC_1-1_neg_009	463.28860:1129 464.29327:407 465.29794:0	null	0	0	0	0	0	0	3088	1495	3882	2875	1730	1703	3956	1708	3368
444	6.686	463.297	no MS2: Pristimerin	[M-H]-	null	0.91	False	-1	463.285	C30H40O4	Triterpenoids	JFACETXYABVHFD-WXPPGMDDSA-N	O=C1C=C2C(=CC=C3C2(C)CCC4(C)C5CC(C(=O)OC)(C)CCC5(C)CCC34C)C(=C1O)C	530	False	True	False	Normalized unit: Intensity; Annotation method: MSMS-Public_all-neg-VS19_1	False	False	444	0	0	0.93	-1	-1	-1	-1	-1	0.93	2064.24	QC_1-1_neg_009	463.28909:2118 464.29376:593 465.29843:0	null	0	0	0	0	0	0	7027	2265	10112	6454	3385	3246	9507	3155	8175
445	0.766	463.954	Unknown	[M-H]-	null	0.9	False	null	null	null	null	null	null	999	False	False	False	Normalized unit: Intensity	False	False	445	0	0	null	null	null	null	null	null	null	1994.84	Plasma_025_neg_047	463.95432:2490 464.95898:435 465.96365:0	null	0	0	0	0	0	0	4338	5386	4620	5051	5129	3895	6014	5041	5272
446	6.488	464.308	no MS2: GLYCOCHOLATE	[M-H]-	null	0.01	False	4.913	464.302	C26H43NO6	Glycinated bile acids and derivatives	RFDAIACWWDREDC-FRVQLJSFSA-N	C[C@H](CCC(=O)NCC(=O)O)[C@H]1CC[C@@H]2[C@@]1([C@H](C[C@H]3[C@H]2[C@@H](C[C@H]4[C@@]3(CC[C@H](C4)O)C)O)O)C	530	False	True	False	Normalized unit: Intensity; Annotation method: MSMS-Public_all-neg-VS19_1	False	False	446	0	0	0.82	-1	-1	-1	-1	-1	0.82	8.12	Plasma_030_neg_053	464.30811:1326 465.31277:422 466.31744:0	null	0	0	0	0	0	0	0	0	0	0	793	0	0	0	0
447	7.211	464.308	no MS2: GLYCOCHOLATE	[M-H]-	null	0.91	False	4.913	464.302	C26H43NO6	Glycinated bile acids and derivatives	RFDAIACWWDREDC-FRVQLJSFSA-N	C[C@H](CCC(=O)NCC(=O)O)[C@H]1CC[C@@H]2[C@@]1([C@H](C[C@H]3[C@H]2[C@@H](C[C@H]4[C@@]3(CC[C@H](C4)O)C)O)O)C	530	False	True	False	Normalized unit: Intensity; Annotation method: MSMS-Public_all-neg-VS19_1	False	False	447	0	0	1	-1	-1	-1	-1	-1	1	2728.98	Plasma_001_neg_014	464.30170:2294 465.30636:233784 466.31103:64781	null	0	0	0	0	0	0	6609	12693	5817	5531	6688	6997	5566	7341	2673
448	5.852	464.31	no MS2: Phosphatidylethanolamine lyso alkenyl 18:0	[M-H]-	null	0.01	False	4.59	464.315	C23H48NO6P	Glycerophosphoethanolamines	RGAPGIRIYHJSJY-HTXNQAPBSA-N	CCCCCCCCCCCCCCCCC=COC(CO)COP(O)(=O)OCCN	530	False	True	False	Normalized unit: Intensity; Annotation method: MSMS-Public_all-neg-VS19_1	False	False	448	0	0	0.88	-1	-1	-1	-1	-1	0.88	7.83	Plasma_030_neg_053	464.30951:1290 465.31418:425 466.31884:0	null	0	0	0	0	0	0	0	0	0	0	81	0	0	0	0
449	7.21	465.306	no MS2: Methyl Deoxycholate	[M+CH3COO]-	null	0.91	False	6.39	465.322	C25H42O4	Dihydroxy bile acids, alcohols and derivatives	ZHUOOEGSSFNTNP-HWAYZWBCSA-N	O=C(OC)CCC(C)C1CCC2C3CCC4CC(O)CCC4(C)C3CC(O)C12C	530	False	True	False	Normalized unit: Intensity; Annotation method: MSMS-Public_all-neg-VS19_1	False	False	449	0	0	0.7	-1	-1	-1	-1	-1	0.7	137859	QC_3-4_neg_082	465.31369:218774 466.31836:59981 467.32303:10732	null	49	40	11	0	97	41	689598	672058	675221	644602	667231	649886	637670	607192	637917
450	7.212	465.467	Unknown	[M-H]-	null	0.4	False	null	null	null	null	null	null	999	False	False	False	Normalized unit: Intensity	False	False	450	0	0	null	null	null	null	null	null	null	2928.48	Plasma_043_neg_074	465.46661:9129 466.47128:0 467.47595:252	null	0	0	0	0	0	0	1779	1784	2202	2761	2267	2293	3695	1721	2907
451	7.19	465.528	Unknown	[M-H]-	null	0.01	False	null	null	null	null	null	null	999	False	False	False	Normalized unit: Intensity	False	False	451	0	0	null	null	null	null	null	null	null	926.5	Plasma_041_neg_072	465.52829:1046 466.53296:267 467.53763:294	null	0	0	0	0	0	0	190	336	231	401	258	187	234	250	161
452	7.183	465.576	Unknown	[M-H]-	null	0.01	False	null	null	null	null	null	null	999	False	False	False	Normalized unit: Intensity	False	False	452	0	0	null	null	null	null	null	null	null	856.88	Plasma_046_neg_078	465.57581:1723 466.58047:565 467.58514:315	null	0	0	0	0	0	0	242	219	211	408	249	294	253	291	192
453	7.193	465.599	Unknown	[M-H]-	null	0.04	False	null	null	null	null	null	null	999	False	False	False	Normalized unit: Intensity	False	False	453	0	0	null	null	null	null	null	null	null	987.02	QC_3-4_neg_082	465.59851:2264 466.60318:423 467.60785:366	null	0	0	0	0	0	0	313	203	115	229	278	210	108	271	420
454	7.185	465.718	Unknown	[M-H]-	null	0.01	False	null	null	null	null	null	null	999	False	False	False	Normalized unit: Intensity	False	False	454	0	0	null	null	null	null	null	null	null	803.94	QC_1-4_neg_080	465.71799:925 466.72265:487 467.72732:225	null	0	0	0	0	0	0	212	281	174	70	42	15	284	166	230
455	9.516	466.296	no MS2: Phosphatidylethanolamine lyso 17:0	[M-H]-	null	0.04	False	3.2	466.294	C22H46NO7P	2-acyl-sn-glycero-3-phosphoethanolamines	SZAICHDWEOHRLW-UHFFFAOYSA-N	CCCCCCCCCCCCCCCCC(=O)OC(CO)COP(O)(=O)OCCN	530	False	True	False	Normalized unit: Intensity; Annotation method: MSMS-Public_all-neg-VS19_1	False	False	455	0	0	0.97	-1	-1	-1	-1	-1	0.97	1403.98	Plasma_008_neg_022	466.29630:2739 467.30096:703 468.30563:0	null	0	0	0	0	0	0	983	501	0	101	27	287	1644	7110	1566
456	7.201	466.441	Unknown	[M-H]-	null	0.26	False	null	null	null	null	null	null	999	False	False	False	Normalized unit: Intensity	False	False	456	0	0	null	null	null	null	null	null	null	2779.64	Plasma_035_neg_064	466.44110:4845 467.44577:0 468.45044:0	null	0	0	0	0	0	0	124	13	49	12	96	61	66	110	37
457	0.619	468.899	Unknown	[M-H]-	null	0.91	False	null	null	null	null	null	null	999	False	False	False	Normalized unit: Intensity	False	False	457	0	0	null	null	null	null	null	null	null	3665.65	Plasma_008_neg_022	468.89880:4196 469.90347:334 470.90814:0	null	61	30	0	357	118	100	6682	6571	7172	7430	7448	7252	7264	7805	6865
458	8.686	469.304	Unknown	[M-H]-	null	0.47	False	null	null	null	null	null	null	999	False	False	False	Normalized unit: Intensity	False	False	458	0	0	null	null	null	null	null	null	null	1187.23	Plasma_041_neg_072	469.30371:2125 470.30838:549 471.31305:0	null	0	0	0	0	0	0	3145	1474	154	822	0	1172	3955	3322	148
459	7.077	471.243	no MS2: SCDCA - Sulfochenodeoxycholic acid	[M-H]-	null	0.01	False	-1	471.242	C24H40O7S	Monohydroxy bile acids, alcohols and derivatives	WHMOBEGYTDWMIG-BSWAIDMHSA-N	CC(CCC(=O)O)C1CCC2C1(CCC3C2C(CC4C3(CCC(C4)OS(=O)(=O)O)C)O)C	530	False	True	False	Normalized unit: Intensity; Annotation method: MSMS-Public_all-neg-VS19_1	False	False	459	0	0	1	-1	-1	-1	-1	-1	1	6.88	Plasma_005_neg_018	471.24280:903 472.24747:228 473.25213:0	null	0	0	0	0	0	0	0	0	0	0	2187	0	0	0	26
460	6.9	471.243	no MS2: SCDCA - Sulfochenodeoxycholic acid	[M-H]-	null	0.03	False	-1	471.242	C24H40O7S	Monohydroxy bile acids, alcohols and derivatives	WHMOBEGYTDWMIG-BSWAIDMHSA-N	CC(CCC(=O)O)C1CCC2C1(CCC3C2C(CC4C3(CCC(C4)OS(=O)(=O)O)C)O)C	530	False	True	False	Normalized unit: Intensity; Annotation method: MSMS-Public_all-neg-VS19_1	False	False	460	0	0	1	-1	-1	-1	-1	-1	1	7.77	Plasma_005_neg_018	471.24280:1101 472.24747:349 473.25213:0	null	0	0	0	0	0	0	980	428	18	70	2774	435	18	0	1073
461	8.338	471.32	Unknown	[M-H]-	null	0.79	False	null	null	null	null	null	null	999	False	False	False	Normalized unit: Intensity	False	False	461	0	0	null	null	null	null	null	null	null	2680.43	Plasma_046_neg_078	471.31989:7152 472.32455:2182 473.32922:382	null	0	0	0	0	0	0	3217	13533	1958	1533	0	12685	1314	6547	1317
462	5.657	473.151	no MS2: NCGC00380975-01_C24H26O10_	[M-H]-	null	0.07	False	-1	473.145	C24H26O10	Benzophenones	XKQFWJXMPAGPGP-UHFFFAOYSA-N	COC(=O)C1=C(C(=O)C2=C(O)C3=C(OC4(C)OC3CCC4O)C=C2OC)C(=CC(=C1)OC)OC	530	False	True	False	Normalized unit: Intensity; Annotation method: MSMS-Public_all-neg-VS19_1	False	False	462	0	0	0.96	-1	-1	-1	-1	-1	0.96	506.21	Plasma_012_neg_027	473.14828:1222 474.15295:287 475.15762:0	null	0	0	0	0	0	0	270	896	391	910	0	948	424	1449	0
463	10.243	473.286	no MS2: NCGC00347571-02_C27H40O4_(3beta,5alpha,8xi,14xi,25S)-3-Hydroxyspirost-9(11)-en-12-one	[M+HCOO]-	null	0.01	False	-1	473.291	C27H40O4	Triterpenoids	YLZUMNXGXFXZNQ-ROUOJVSVSA-N	C[C@H]1CC[C@@]2(OC1)O[C@H]3CC4C\5CC[C@H]6C[C@@H](O)CC[C@]6(C)C5=C/C(=O)[C@]4(C)[C@H]3[C@@H]2C	530	False	True	False	Normalized unit: Intensity; Annotation method: MSMS-Public_all-neg-VS19_1	False	False	463	0	0	0.88	-1	-1	-1	-1	-1	0.88	44.3	Plasma_008_neg_022	473.28580:2383 474.29046:614 475.29513:0	null	767	677	856	556	531	904	1730	412	424	1056	940	403	2797	9105	1185
464	7.873	473.329	Unknown	[M-H]-	null	0.01	False	null	null	null	null	null	null	999	False	False	False	Normalized unit: Intensity	False	False	464	0	0	null	null	null	null	null	null	null	23.47	Plasma_006_neg_020	473.32870:898 474.33337:227 475.33804:0	null	0	0	0	0	0	0	611	930	17	318	0	2109	0	0	0
465	9.173	474.27	no MS2: C23H42NO7P; PlaSMA ID-1303	[M-H]-	null	0.01	False	10.16	474.263	C23H42NO7P	Formula predicted	null	null	530	False	True	False	Normalized unit: Intensity; Annotation method: MSMS-Public_all-neg-VS19_1	False	False	465	0	0	0.77	-1	-1	-1	-1	-1	0.69	948	Plasma_033_neg_062	474.26990:1056 475.27457:298 476.27923:0	null	0	0	0	0	0	0	120	97	0	0	0	440	297	58	77
466	9.639	476.286	no MS2: Phosphatidylethanolamine lyso 18:2	[M-H]-	null	0.9	False	2	476.278	C23H44NO7P	2-acyl-sn-glycero-3-phosphoethanolamines	DTTGTTCKWRAIFM-HDXUUTQWSA-N	CCCCCCCCCCC=CCC=CCCC(=O)OC(CO)COP(O)(=O)OCCN	530	False	True	False	Normalized unit: Intensity; Annotation method: MSMS-Public_all-neg-VS19_1	False	False	466	0	0	1	-1	-1	-1	-1	-1	1	7483.02	QC_1-1_neg_009	476.27820:10163 477.28287:2577 478.28753:426	null	0	0	0	0	0	0	23523	9624	1681	5233	9890	19355	21865	23773	16449
467	9.459	476.286	no MS2: Phosphatidylethanolamine lyso 18:2	[M-H]-	null	0.78	False	2	476.278	C23H44NO7P	2-acyl-sn-glycero-3-phosphoethanolamines	DTTGTTCKWRAIFM-HDXUUTQWSA-N	CCCCCCCCCCC=CCC=CCCC(=O)OC(CO)COP(O)(=O)OCCN	530	False	True	False	Normalized unit: Intensity; Annotation method: MSMS-Public_all-neg-VS19_1	False	False	467	0	0	1	-1	-1	-1	-1	-1	1	1784.7	Plasma_002_neg_015	476.27841:1121 477.28308:294 478.28775:0	null	0	0	0	0	0	0	4276	2672	212	913	1989	4735	2912	2309	2443
468	9.312	478.297	no MS2: LPE 18:1; PlaSMA ID-1334	[M-H]-	null	0.79	False	10.22	478.294	C23H46NO7P	Lipids	PYVRVRFVLRNJLY-UHFFFAOYNA-N	O=C(OCC(O)COP(=O)(O)OCCN)CCCCCCCC=CCCCCCCCC	530	False	True	False	Normalized unit: Intensity; Annotation method: MSMS-Public_all-neg-VS19_1	False	False	468	0	0	1	-1	-1	-1	-1	-1	1	1453.9	QC_1-1_neg_009	478.29419:2352 479.29886:587 480.30352:0	null	0	0	0	0	0	0	8296	3496	1367	2355	2031	801	8954	22916	6880
469	10.13	478.303	no MS2: LPE 18:1; PlaSMA ID-1334	[M-H]-	null	0.03	False	10.22	478.294	C23H46NO7P	Lipids	PYVRVRFVLRNJLY-UHFFFAOYNA-N	O=C(OCC(O)COP(=O)(O)OCCN)CCCCCCCC=CCCCCCCCC	530	False	True	False	Normalized unit: Intensity; Annotation method: MSMS-Public_all-neg-VS19_1	False	False	469	0	0	0.74	-1	-1	-1	-1	-1	0.74	7.09	Plasma_033_neg_062	478.30191:834 479.30658:296 480.31125:3927	null	0	0	0	0	0	0	951	385	0	0	260	814	599	997	476
470	10.341	478.303	no MS2: Phosphatidylethanolamine lyso 18:1	[M-H]-	null	0.84	False	2.45	478.294	C23H46NO7P	2-acyl-sn-glycero-3-phosphoethanolamines	FEVAUEZKXSRQPS-PFONDFGASA-N	CCCCCCCCCCCCCC=CCCC(=O)OC(CO)COP(O)(=O)OCCN	530	False	True	False	Normalized unit: Intensity; Annotation method: MSMS-Public_all-neg-VS19_1	False	False	470	0	0	1	-1	-1	-1	-1	-1	1	3276.02	QC_1-1_neg_009	478.29401:5164 479.29867:1357 480.30334:493	null	0	0	0	0	0	0	12122	4684	1586	2043	4001	8269	12122	15850	7558
471	7.982	478.324	Unknown	[M-H]-	null	0.01	False	null	null	null	null	null	null	999	False	False	False	Normalized unit: Intensity	False	False	471	0	0	null	null	null	null	null	null	null	4.48	Plasma_033_neg_062	478.32361:1269 479.32828:373 480.33294:0	null	0	0	0	0	0	0	170	598	0	0	582	0	582	427	0
472	9.867	480.312	no MS2: (2-aminoethoxy)[2-hydroxy-3-(octadecanoyloxy)propoxy]phosphinic acid	[M-H]-	null	0.78	False	-1	480.31	C23H48NO7P	1-acyl-sn-glycero-3-phosphoethanolamines	BBYWOYAFBUOUFP-JOCHJYFZSA-N	[H][C@@](O)(COC(=O)CCCCCCCCCCCCCCCCC)COP(O)(=O)OCCN	530	False	True	False	Normalized unit: Intensity; Annotation method: MSMS-Public_all-neg-VS19_1	False	False	472	0	0	1	-1	-1	-1	-1	-1	1	688.53	QC_3-1_neg_011	480.30991:2002 481.31457:604 482.31924:0	null	0	0	0	0	0	0	5518	3215	465	1700	1719	2540	6633	23287	7229
473	10.082	480.313	no MS2: (2-aminoethoxy)[2-hydroxy-3-(octadecanoyloxy)propoxy]phosphinic acid	[M-H]-	null	0.91	False	-1	480.31	C23H48NO7P	1-acyl-sn-glycero-3-phosphoethanolamines	BBYWOYAFBUOUFP-JOCHJYFZSA-N	[H][C@@](O)(COC(=O)CCCCCCCCCCCCCCCCC)COP(O)(=O)OCCN	530	False	True	False	Normalized unit: Intensity; Annotation method: MSMS-Public_all-neg-VS19_1	False	False	473	0	0	1	-1	-1	-1	-1	-1	1	8184.23	QC_1-1_neg_009	480.31000:18725 481.31467:4674 482.31933:997	null	0	0	0	0	0	0	71928	49804	20780	30624	31470	44641	77405	135904	79189
474	11.201	480.314	no MS2: (2-aminoethoxy)[2-hydroxy-3-(octadecanoyloxy)propoxy]phosphinic acid	[M-H]-	null	0.88	False	-1	480.31	C23H48NO7P	1-acyl-sn-glycero-3-phosphoethanolamines	BBYWOYAFBUOUFP-JOCHJYFZSA-N	[H][C@@](O)(COC(=O)CCCCCCCCCCCCCCCCC)COP(O)(=O)OCCN	530	False	True	False	Normalized unit: Intensity; Annotation method: MSMS-Public_all-neg-VS19_1	False	False	474	0	0	0.99	-1	-1	-1	-1	-1	0.99	2224.94	QC_1-1_neg_009	480.31061:7010 481.31528:1845 482.31994:360	null	0	0	0	0	0	0	20623	6016	2230	7063	15912	8747	32859	42510	37574
475	10.973	480.315	no MS2: (2-aminoethoxy)[2-hydroxy-3-(octadecanoyloxy)propoxy]phosphinic acid	[M-H]-	null	0.07	False	-1	480.31	C23H48NO7P	1-acyl-sn-glycero-3-phosphoethanolamines	BBYWOYAFBUOUFP-JOCHJYFZSA-N	[H][C@@](O)(COC(=O)CCCCCCCCCCCCCCCCC)COP(O)(=O)OCCN	530	False	True	False	Normalized unit: Intensity; Annotation method: MSMS-Public_all-neg-VS19_1	False	False	475	0	0	0.95	-1	-1	-1	-1	-1	0.95	18.54	Plasma_009_neg_023	480.31281:992 481.31747:337 482.32214:0	null	0	0	0	0	0	0	653	119	0	176	1156	269	2858	4492	3261
476	10.067	480.45	Unknown	[M-H]-	null	0.03	False	null	null	null	null	null	null	999	False	False	False	Normalized unit: Intensity	False	False	476	0	0	null	null	null	null	null	null	null	1086.59	QC_4-4_neg_083	480.44989:1483 481.45456:0 482.45923:0	null	0	0	0	0	0	0	22	99	0	7	0	21	88	286	80
477	0.62	484.873	Unknown	[M-H]-	null	0.24	False	null	null	null	null	null	null	999	False	False	False	Normalized unit: Intensity	False	False	477	0	0	null	null	null	null	null	null	null	481.07	Plasma_008_neg_022	484.87259:1168 485.87726:0 486.88192:0	null	0	0	0	0	0	0	1271	1144	1466	1218	1251	1282	1258	1673	1154
478	3.703	486.31	Unknown	[M-H]-	null	0.01	False	null	null	null	null	null	null	999	False	False	False	Normalized unit: Intensity	False	False	478	0	0	null	null	null	null	null	null	null	1108.31	Plasma_018_neg_039	486.31000:1124 487.31467:276 488.31933:0	null	0	0	0	0	0	0	24	140	14	758	0	489	26	0	291
479	0.578	486.889	Unknown	[M-H]-	null	0.91	False	null	null	null	null	null	null	999	False	False	False	Normalized unit: Intensity	False	False	479	0	0	null	null	null	null	null	null	null	1604.14	Plasma_028_neg_051	486.88931:2128 487.89398:519 488.89865:527	null	0	0	0	0	0	0	1260	1415	1362	953	1000	1196	1126	1107	1194
480	4.003	486.969	no MS2: PFCA-H; C11H4F16O3	[M-H]-	null	0.56	False	-1	486.983	C11H4F16O3	Carboxylic acids	SGLTWOYPCRYYKV-IWQZZHSRSA-N	O=C(O)COC(F)(F)C(F)(F)C(F)(F)C(F)(F)C(F)(F)C(F)(F)C(F)=CC(F)(F)F	530	False	True	False	Normalized unit: Intensity; Annotation method: MSMS-Public_all-neg-VS19_1	False	False	480	0	0	0.95	-1	-1	-1	-1	-1	0.95	43.74	Plasma_040_neg_070	486.98010:1068 487.98477:163 488.98944:0	null	0	0	0	0	0	0	1759	1130	982	3080	2046	1698	2718	1506	2208
481	4	488.966	no MS2: Perfluorosebacic acid	[M-H]-	null	0.54	False	-1	488.962	C10H2F16O4	Medium-chain fatty acids	YPCSMEGZIYWAAZ-UHFFFAOYSA-N	O=C(O)C(F)(F)C(F)(F)C(F)(F)C(F)(F)C(F)(F)C(F)(F)C(F)(F)C(F)(F)C(=O)O	530	False	True	False	Normalized unit: Intensity; Annotation method: MSMS-Public_all-neg-VS19_1	False	False	481	0	0	0.95	-1	-1	-1	-1	-1	0.95	20.17	QC_1-1_neg_009	488.96579:1084 489.97046:293 490.97513:453	null	0	0	0	0	0	0	3017	1038	1139	2298	1953	1080	1263	1278	1941
482	9.558	491.214	no MS2: NCGC00380484-01_C22H36O12_beta-D-Glucopyranose, 6-O-beta-D-glucopyranosyl-1-O-[(2,6,6-trimethyl-1-cyclohexen-1-yl)carbonyl]-	[M-H]-	null	0.09	False	-1	491.213	C22H36O12	O-glycosyl compounds	URTXXFGOVQACIC-UHFFFAOYSA-N	CC/1=C(C(=O)OC2OC(COC3OC(CO)C(O)C(O)C3O)C(O)C(O)C2O)/C(C)(C)CCC1	530	False	True	False	Normalized unit: Intensity; Annotation method: MSMS-Public_all-neg-VS19_1	False	False	482	0	0	1	-1	-1	-1	-1	-1	1	1342.53	Plasma_016_neg_037	491.21439:1944 492.21905:665 493.22372:0	null	0	0	0	0	0	0	1363	1834	0	35	1972	0	441	620	0
483	7.811	492.276	Unknown	[M-H]-	null	0.19	False	null	null	null	null	null	null	999	False	False	False	Normalized unit: Intensity	False	False	483	0	0	null	null	null	null	null	null	null	1192.11	Plasma_012_neg_027	492.27621:2988 493.28088:820 494.28555:0	null	0	0	0	0	0	0	625	353	0	107	44	1467	208	4045	907
484	7.685	492.277	Unknown	[M-H]-	null	0.01	False	null	null	null	null	null	null	999	False	False	False	Normalized unit: Intensity	False	False	484	0	0	null	null	null	null	null	null	null	864.69	Plasma_017_neg_038	492.27661:895 493.28128:162 494.28595:0	null	0	0	0	0	0	0	0	206	0	0	0	660	0	0	0
485	7.916	492.277	Unknown	[M-H]-	null	0.18	False	null	null	null	null	null	null	999	False	False	False	Normalized unit: Intensity	False	False	485	0	0	null	null	null	null	null	null	null	1184.6	Plasma_017_neg_038	492.27719:2071 493.28186:534 494.28653:0	null	0	0	0	0	0	0	139	223	16	107	44	773	130	2812	646
486	8.037	492.282	Unknown	[M-H]-	null	0.07	False	null	null	null	null	null	null	999	False	False	False	Normalized unit: Intensity	False	False	486	0	0	null	null	null	null	null	null	null	1313.86	Plasma_045_neg_076	492.28171:1969 493.28638:528 494.29104:0	null	0	0	0	0	0	0	17	180	16	0	0	0	64	1512	140
487	0.584	492.905	no MS2: "3,5-Dichlororsellinic acid"	[M-H2O-H]-	null	0.9	False	-1	492.903	C8H6Cl2O4	Dichlorobenzoic acids	QZKUNAATQJYHIC-UHFFFAOYSA-N	O=C(O)c1c(C)c(Cl)c(O)c(Cl)c1O	530	False	True	False	Normalized unit: Intensity; Annotation method: MSMS-Public_all-neg-VS19_1	False	False	487	0	0	1	-1	-1	-1	-1	-1	1	1045.79	Plasma_009_neg_023	492.90320:1299 493.90787:290 494.91253:0	null	0	0	0	0	0	0	834	974	1089	649	605	787	746	713	780
488	10.674	494.33	Unknown	[M-H]-	null	0.31	False	null	null	null	null	null	null	999	False	False	False	Normalized unit: Intensity	False	False	488	0	0	null	null	null	null	null	null	null	1082.2	Plasma_008_neg_022	494.32971:3128 495.33438:870 496.33905:0	null	0	0	0	0	0	0	1144	893	69	65	17	695	1808	9509	2437
489	7.596	495.303	no MS2: 2-[(6,7-dimethoxy-1,2,3,4-tetrahydroisoquinolin-1-yl)methyl]-3-ethyl-9,10-dimethoxy-5-oxido-2,3,4,6,7,11b-hexahydro-1H-benzo[a]quinolizin-5-ium	[M-H]-	null	0.34	False	-1	495.286	C29H40N2O5	Emetine alkaloids	SSQAXSNCMRBPGJ-UHFFFAOYSA-N	O=N12CCC3=CC(OC)=C(OC)C=C3C2CC(CC4NCCC5=CC(OC)=C(OC)C=C54)C(CC)C1	530	False	True	False	Normalized unit: Intensity; Annotation method: MSMS-Public_all-neg-VS19_1	False	False	489	0	0	0.62	-1	-1	-1	-1	-1	0.62	1660.45	QC_4-1_neg_012	495.29620:863 496.30087:284 497.30554:0	null	0	0	0	0	0	0	4437	1122	6990	0	3669	46	134	33	969
490	4.001	496.998	Unknown	[M-H]-	null	0.9	False	null	null	null	null	null	null	999	False	False	False	Normalized unit: Intensity	False	False	490	0	0	null	null	null	null	null	null	null	362.35	QC_1-1_neg_009	496.99829:1395 498.00296:451 499.00763:0	null	0	0	0	0	0	0	3476	3369	3328	3220	3325	3203	3080	2755	3198
491	7.536	498.295	no MS2: Taurodeoxycholic acid	[M-H]-	null	0.03	False	1.639	498.289	C26H45NO6S	Taurinated bile acids and derivatives	AWDRATDZQPNJFN-VAYUFCLWSA-N	C[C@H](CCC(=O)NCCS(=O)(=O)O)[C@H]1CC[C@@H]2[C@@]1([C@H](C[C@H]3[C@H]2CC[C@H]4[C@@]3(CC[C@H](C4)O)C)O)C	530	False	True	False	Normalized unit: Intensity; Annotation method: MSMS-Public_all-neg-VS19_1	False	False	491	0	0	0.86	-1	-1	-1	-1	-1	0.86	3192.34	Plasma_030_neg_053	498.29501:4762 499.29968:1493 500.30435:542	null	0	0	0	0	0	0	513	196	0	0	1325	0	0	0	0
492	0.591	498.921	no MS2: Perfluorooctanesulfonic acid	[M-H]-	null	0.13	False	15.459	498.93	C8HF17O3S	Perfluorooctane sulfonic acid and derivatives	YFSUTJLHUFNCNZ-UHFFFAOYSA-N	OS(=O)(=O)C(F)(F)C(F)(F)C(F)(F)C(F)(F)C(F)(F)C(F)(F)C(F)(F)C(F)(F)F	530	False	True	False	Normalized unit: Intensity; Annotation method: MSMS-Public_all-neg-VS19_1	False	False	492	0	0	0.97	-1	-1	-1	-1	-1	0.97	599.1	Plasma_044_neg_075	498.92780:952 499.93246:0 500.93713:0	null	0	0	0	0	0	0	749	916	1029	698	558	720	703	558	807
493	4.001	498.995	Unknown	[M-H]-	null	0.81	False	null	null	null	null	null	null	999	False	False	False	Normalized unit: Intensity	False	False	493	0	0	null	null	null	null	null	null	null	266.47	QC_1-1_neg_009	498.99469:1090 499.99936:232 501.00403:241	null	0	0	0	0	0	0	2477	1409	2441	2309	1547	2332	2190	1044	2292
494	8.532	499.308	no MS2: NCGC00385359-01_C30H46O7_(3beta,8xi,9xi)-3-[(2,6-Dideoxy-3-O-methylhexopyranosyl)oxy]-14-hydroxycard-20(22)-enolide	[M-H2O-H]-	null	0.01	False	-1	499.307	C30H46O7	Cardenolide glycosides and derivatives	YBZZSZQZDODUAA-HAIXVIHQSA-N	COC1CC(OC(C)C1O)O[C@H]2CC[C@@]3(C)C(CCC4C3CC[C@]5(C)[C@H](CC[C@]45O)\C6=C\C(=O)OC6)C2	530	False	True	False	Normalized unit: Intensity; Annotation method: MSMS-Public_all-neg-VS19_1	False	False	494	0	0	1	-1	-1	-1	-1	-1	1	854.69	Plasma_006_neg_020	499.30750:823 500.31216:249 501.31683:0	null	0	0	0	0	0	0	381	654	97	360	0	2050	0	0	0
495	8.977	499.316	no MS2: NCGC00385359-01_C30H46O7_(3beta,8xi,9xi)-3-[(2,6-Dideoxy-3-O-methylhexopyranosyl)oxy]-14-hydroxycard-20(22)-enolide	[M-H2O-H]-	null	0.01	False	-1	499.307	C30H46O7	Cardenolide glycosides and derivatives	YBZZSZQZDODUAA-HAIXVIHQSA-N	COC1CC(OC(C)C1O)O[C@H]2CC[C@@]3(C)C(CCC4C3CC[C@]5(C)[C@H](CC[C@]45O)\C6=C\C(=O)OC6)C2	530	False	True	False	Normalized unit: Intensity; Annotation method: MSMS-Public_all-neg-VS19_1	False	False	495	0	0	0.64	-1	-1	-1	-1	-1	0.64	6.41	Plasma_033_neg_062	499.31589:916 500.32056:266 501.32522:0	null	0	0	0	0	0	0	0	0	0	0	538	0	37	0	0
496	9.517	500.286	no MS2: Fexofenadine	[M-H]-	null	0.44	False	8.2	500.281	C32H39NO4	Diphenylmethanes	RWTNPBWLLIMQHL-UHFFFAOYSA-N	CC(C)(C1=CC=C(C=C1)C(CCCN2CCC(CC2)C(C3=CC=CC=C3)(C4=CC=CC=C4)O)O)C(=O)O	530	False	True	False	Normalized unit: Intensity; Annotation method: MSMS-Public_all-neg-VS19_1	False	False	496	0	0	1	-1	-1	-1	-1	-1	1	1179.35	Plasma_010_neg_024	500.28070:1227 501.28537:316 502.29004:0	null	0	0	0	0	0	0	3798	1937	163	516	3482	1403	3600	190	3017
497	9.669	500.286	no MS2: Phosphatidylethanolamine lyso 20:4	[M-H]-	null	0.78	False	1.91	500.278	C25H44NO7P	2-acyl-sn-glycero-3-phosphoethanolamines	SOFGMCJQWLTKCE-ZKWNWVNESA-N	CCCCCCC=CCC=CCC=CCC=CCCC(=O)OC(CO)COP(O)(=O)OCCN	530	False	True	False	Normalized unit: Intensity; Annotation method: MSMS-Public_all-neg-VS19_1	False	False	497	0	0	1	-1	-1	-1	-1	-1	1	2344.22	QC_1-1_neg_009	500.27829:2896 501.28296:800 502.28763:202	null	0	0	0	0	0	0	9794	4992	358	2011	5273	4255	11236	4365	6690
498	0.665	500.643	Unknown	[M-H]-	null	0.65	False	null	null	null	null	null	null	999	False	False	False	Normalized unit: Intensity	False	False	498	0	0	null	null	null	null	null	null	null	855	Plasma_036_neg_066	500.64291:1160 501.64758:0 502.65225:0	null	0	0	0	0	0	0	860	873	749	885	878	904	843	732	822
499	0.633	500.861	Unknown	[M-H]-	null	0.87	False	null	null	null	null	null	null	999	False	False	False	Normalized unit: Intensity	False	False	499	0	0	null	null	null	null	null	null	null	922.4	Plasma_036_neg_066	500.86099:1243 501.86566:0 502.87033:0	null	0	0	0	0	0	0	694	668	610	776	748	803	729	687	727
500	9.133	502.302	no MS2: Phosphatidylethanolamine lyso 20:3	[M-H]-	null	0.13	False	2.14	502.294	C25H46NO7P	2-acyl-sn-glycero-3-phosphoethanolamines	BGJVXSMYONPLDN-NWFXIAEYSA-N	CCCCCCCCCC=CCC=CCC=CCCC(=O)OC(CO)COP(O)(=O)OCCN	530	False	True	False	Normalized unit: Intensity; Annotation method: MSMS-Public_all-neg-VS19_1	False	False	500	0	0	0.99	-1	-1	-1	-1	-1	0.99	920.59	Plasma_001_neg_014	502.29529:979 503.29996:306 504.30462:0	null	0	0	0	0	0	0	2229	868	0	0	0	1549	583	1488	864
501	9.233	502.302	no MS2: Phosphatidylethanolamine lyso 20:3	[M-H]-	null	0.09	False	2.14	502.294	C25H46NO7P	2-acyl-sn-glycero-3-phosphoethanolamines	BGJVXSMYONPLDN-NWFXIAEYSA-N	CCCCCCCCCC=CCC=CCC=CCCC(=O)OC(CO)COP(O)(=O)OCCN	530	False	True	False	Normalized unit: Intensity; Annotation method: MSMS-Public_all-neg-VS19_1	False	False	501	0	0	1	-1	-1	-1	-1	-1	1	1144.46	Plasma_001_neg_014	502.29459:1134 503.29925:252 504.30392:0	null	0	0	0	0	0	0	2707	1119	74	435	0	29	800	3019	789
502	0.666	502.641	Unknown	[M-H]-	null	0.91	False	null	null	null	null	null	null	999	False	False	False	Normalized unit: Intensity	False	False	502	0	0	null	null	null	null	null	null	null	1060.96	Plasma_036_neg_066	502.64069:1363 503.64535:0 504.65002:0	null	0	0	0	0	0	0	1173	1103	943	1177	1125	1131	1064	917	1067
503	0.577	502.861	Unknown	[M-H]-	null	0.9	False	null	null	null	null	null	null	999	False	False	False	Normalized unit: Intensity	False	False	503	0	0	null	null	null	null	null	null	null	1628.2	Plasma_001_neg_014	502.86081:2549 503.86548:203 504.87014:0	null	0	0	0	0	0	0	1629	1443	981	1206	1446	1427	1354	1583	1186
504	9.515	504.312	Unknown	[M-H]-	null	0.79	False	null	null	null	null	null	null	999	False	False	False	Normalized unit: Intensity	False	False	504	0	0	null	null	null	null	null	null	null	1959.85	Plasma_008_neg_022	504.31229:3084 505.31695:872 506.32162:0	null	0	0	0	0	0	0	5762	2929	369	1133	11	4335	3481	8434	4868
505	9.696	504.313	Unknown	[M-H]-	null	0.91	False	null	null	null	null	null	null	999	False	False	False	Normalized unit: Intensity	False	False	505	0	0	null	null	null	null	null	null	null	11385.5	Plasma_008_neg_022	504.31259:17732 505.31726:5190 506.32193:1040	null	0	0	0	0	0	0	50169	26312	6565	11248	10813	36775	32379	65352	37541
506	0.666	504.634	Unknown	[M-H]-	null	0.26	False	null	null	null	null	null	null	999	False	False	False	Normalized unit: Intensity	False	False	506	0	0	null	null	null	null	null	null	null	858.41	Plasma_016_neg_037	504.63419:1159 505.63885:0 506.64352:0	null	0	0	0	0	0	0	741	798	660	823	810	801	726	624	785
507	10.408	506.335	no MS2: Phosphatidylethanolamine lyso 20:1	[M-H]-	null	0.91	False	3.35	506.325	C25H50NO7P	2-acyl-sn-glycero-3-phosphoethanolamines	URXPORXPKXWHEF-MSUUIHNZSA-N	CCCCCCCCCCCCCCCC=CCCC(=O)OC(CO)COP(O)(=O)OCCN	530	False	True	False	Normalized unit: Intensity; Annotation method: MSMS-Public_all-neg-VS19_1	False	False	507	0	0	1	-1	-1	-1	-1	-1	1	7062.19	QC_1-1_neg_009	506.32581:9129 507.33047:2605 508.33514:413	null	0	0	0	0	0	0	37193	18103	6831	7229	8399	20372	25494	59965	22528
508	10.209	506.336	no MS2: Phosphatidylethanolamine lyso 20:1	[M-H]-	null	0.44	False	3.35	506.325	C25H50NO7P	2-acyl-sn-glycero-3-phosphoethanolamines	URXPORXPKXWHEF-MSUUIHNZSA-N	CCCCCCCCCCCCCCCC=CCCC(=O)OC(CO)COP(O)(=O)OCCN	530	False	True	False	Normalized unit: Intensity; Annotation method: MSMS-Public_all-neg-VS19_1	False	False	508	0	0	1	-1	-1	-1	-1	-1	1	1067.21	QC_4-1_neg_012	506.32520:1113 507.32986:270 508.33453:0	null	0	0	0	0	0	0	3152	567	65	89	378	209	1949	5623	1209
509	11.285	508.346	no MS2: Phosphatidylethanolamine lyso 20:0	[M-H]-	null	0.91	False	6.31	508.341	C25H52NO7P	2-acyl-sn-glycero-3-phosphoethanolamines	QEQAJJJSRGAOOG-UHFFFAOYSA-N	CCCCCCCCCCCCCCCCCCCC(=O)OC(CO)COP(O)(=O)OCCN	530	False	True	False	Normalized unit: Intensity; Annotation method: MSMS-Public_all-neg-VS19_1	False	False	509	0	0	1	-1	-1	-1	-1	-1	1	8075.79	QC_2-1_neg_010	508.34171:11400 509.34637:3085 510.35104:642	null	0	0	0	0	20	0	50706	22193	14354	16733	17194	35198	43020	102323	59926
510	11.053	508.346	no MS2: Phosphatidylethanolamine lyso 20:0	[M-H]-	null	0.37	False	6.31	508.341	C25H52NO7P	2-acyl-sn-glycero-3-phosphoethanolamines	QEQAJJJSRGAOOG-UHFFFAOYSA-N	CCCCCCCCCCCCCCCCCCCC(=O)OC(CO)COP(O)(=O)OCCN	530	False	True	False	Normalized unit: Intensity; Annotation method: MSMS-Public_all-neg-VS19_1	False	False	510	0	0	1	-1	-1	-1	-1	-1	1	564.75	QC_3-1_neg_011	508.34161:1339 509.34628:395 510.35095:0	null	0	0	0	0	0	0	3515	819	150	577	232	973	1770	14521	4974
511	0.584	508.88	Unknown	[M-H]-	null	0.91	False	null	null	null	null	null	null	999	False	False	False	Normalized unit: Intensity	False	False	511	0	0	null	null	null	null	null	null	null	1811.27	Plasma_008_neg_022	508.87961:2628 509.88428:305 510.88894:0	null	0	0	0	0	0	0	1821	1780	1460	1450	1605	1622	1562	1805	1456
512	6.472	509.283	Unknown	[M-H]-	null	0.01	False	null	null	null	null	null	null	999	False	False	False	Normalized unit: Intensity	False	False	512	0	0	null	null	null	null	null	null	null	998	Plasma_030_neg_053	509.28320:1005 510.28787:352 511.29254:0	null	0	0	0	0	0	0	565	20	567	0	1632	15	0	0	14
513	6.907	510.333	Unknown	[M-H]-	null	0.91	False	null	null	null	null	null	null	999	False	False	False	Normalized unit: Intensity	False	False	513	0	0	null	null	null	null	null	null	null	2110.99	QC_1-3_neg_055	510.33261:2443 511.33728:609 512.34195:0	null	0	0	0	0	0	0	5096	4919	4813	4673	4790	4727	4559	4217	4611
514	0.629	510.886	Unknown	[M-H]-	null	0.91	False	null	null	null	null	null	null	999	False	False	False	Normalized unit: Intensity	False	False	514	0	0	null	null	null	null	null	null	null	1743.14	Plasma_016_neg_037	510.88571:2619 511.89038:0 512.89505:0	null	0	0	0	0	0	0	1244	1319	1131	1393	1447	1433	1311	1100	1437
515	6.897	511.298	Unknown	[M-H]-	null	0.01	False	null	null	null	null	null	null	999	False	False	False	Normalized unit: Intensity	False	False	515	0	0	null	null	null	null	null	null	null	9.6	Plasma_030_neg_053	511.29779:1008 512.30246:0 513.30713:0	null	0	0	0	0	0	0	21	0	15	0	59	93	0	0	0
516	6.363	511.298	Unknown	[M-H]-	null	0.01	False	null	null	null	null	null	null	999	False	False	False	Normalized unit: Intensity	False	False	516	0	0	null	null	null	null	null	null	null	13.23	Plasma_030_neg_053	511.29779:1310 512.30246:355 513.30713:0	null	0	0	0	0	0	0	437	0	607	0	51	25	0	0	0
517	7.754	512.274	Unknown	[M-H]-	null	0.04	False	null	null	null	null	null	null	999	False	False	False	Normalized unit: Intensity	False	False	517	0	0	null	null	null	null	null	null	null	1283.83	Plasma_030_neg_053	512.27441:2203 513.27908:675 514.28375:192	null	0	0	0	0	0	0	18	0	0	0	2103	0	0	0	0
518	7.864	512.275	Unknown	[M-H]-	null	0.04	False	null	null	null	null	null	null	999	False	False	False	Normalized unit: Intensity	False	False	518	0	0	null	null	null	null	null	null	null	1626.15	Plasma_030_neg_053	512.27478:2598 513.27945:793 514.28412:241	null	0	0	0	0	0	0	23	0	0	0	2537	0	0	0	0
519	8.976	512.302	Unknown	[M-H]-	null	0.75	False	null	null	null	null	null	null	999	False	False	False	Normalized unit: Intensity	False	False	519	0	0	null	null	null	null	null	null	null	1774.34	Plasma_008_neg_022	512.30170:5655 513.30636:1574 514.31103:333	null	0	0	0	0	0	0	2817	1676	427	1638	1018	1923	6487	15278	4499
520	0.591	514.9	no MS2: 8-Chloro-1,1,2,2,3,3,4,4,5,5,6,6,7,7,8,8-hexadecafluoro-1-octanesulfonic acid	[M-H]-	null	0.91	False	-1	514.901	C8HClF16O3S	Organosulfonic acids	TXNZTTQBKZRWQR-UHFFFAOYSA-N	O=S(=O)(O)C(F)(F)C(F)(F)C(F)(F)C(F)(F)C(F)(F)C(F)(F)C(F)(F)C(F)(F)Cl	530	False	True	False	Normalized unit: Intensity; Annotation method: MSMS-Public_all-neg-VS19_1	False	False	520	0	0	1	-1	-1	-1	-1	-1	1	2815.03	Plasma_025_neg_047	514.90070:3122 515.90536:188 516.91003:0	null	0	0	0	0	0	0	4331	4221	3628	3763	3941	4152	3965	4003	3811
521	7.812	515.298	no MS2: 9-hydroxy-5b,8,11a-trimethyl-1-prop-1-en-2-yl-1,2,3,4,5,6,7,7a,9,10,11,11b,12,13,13a,13b-hexadecahydrocyclopenta[a]chrysene-3a,5a,8-tricarboxylic acid	[M-H]-	null	0.91	False	5.312	515.301	C30H44O7	Triterpenoids	FTGKHGAVFGGOMW-UHFFFAOYSA-N	O=C(O)C12CCC(C(=C)C)C2C3CCC4C5(C)CCC(O)C(C(=O)O)(C)C5CCC4(C)C3(C(=O)O)CC1	530	False	True	False	Normalized unit: Intensity; Annotation method: MSMS-Public_all-neg-VS19_1	False	False	521	0	0	1	-1	-1	-1	-1	-1	1	3961.9	Plasma_020_neg_041	515.30139:3909 516.30606:1154 517.31073:0	null	0	0	0	0	0	0	10010	9440	9306	9055	9144	9176	8901	8722	9198
522	8.47	515.312	no MS2: 9-hydroxy-5b,8,11a-trimethyl-1-prop-1-en-2-yl-1,2,3,4,5,6,7,7a,9,10,11,11b,12,13,13a,13b-hexadecahydrocyclopenta[a]chrysene-3a,5a,8-tricarboxylic acid	[M-H]-	null	0.01	False	5.312	515.301	C30H44O7	Triterpenoids	FTGKHGAVFGGOMW-UHFFFAOYSA-N	O=C(O)C12CCC(C(=C)C)C2C3CCC4C5(C)CCC(O)C(C(=O)O)(C)C5CCC4(C)C3(C(=O)O)CC1	530	False	True	False	Normalized unit: Intensity; Annotation method: MSMS-Public_all-neg-VS19_1	False	False	522	0	0	0.62	-1	-1	-1	-1	-1	0.62	1083.44	Plasma_033_neg_062	515.31158:1089 516.31625:357 517.32092:0	null	0	0	0	0	0	0	0	13	0	0	16	0	0	0	0
523	8.922	515.313	Unknown	[M-H]-	null	0.01	False	null	null	null	null	null	null	999	False	False	False	Normalized unit: Intensity	False	False	523	0	0	null	null	null	null	null	null	null	1381.13	Plasma_033_neg_062	515.31329:1443 516.31796:434 517.32263:0	null	0	0	0	0	0	0	0	0	0	0	482	0	0	0	0
524	8.379	516.294	Unknown	[M-H]-	null	0.07	False	null	null	null	null	null	null	999	False	False	False	Normalized unit: Intensity	False	False	524	0	0	null	null	null	null	null	null	null	862.4	Plasma_007_neg_021	516.29382:1037 517.29849:606 518.30316:0	null	0	0	0	0	0	0	2291	2250	0	229	2473	0	2823	218	25
525	0.665	516.618	Unknown	[M-H]-	null	0.91	False	null	null	null	null	null	null	999	False	False	False	Normalized unit: Intensity	False	False	525	0	0	null	null	null	null	null	null	null	950.52	Plasma_026_neg_049	516.61780:1062 517.62247:0 518.62713:0	null	0	0	0	0	0	0	964	960	917	986	974	1010	938	947	949
526	0.634	516.837	Unknown	[M-H]-	null	0.19	False	null	null	null	null	null	null	999	False	False	False	Normalized unit: Intensity	False	False	526	0	0	null	null	null	null	null	null	null	817.61	QC_3-4_neg_082	516.83710:939 517.84176:0 518.84643:0	null	0	0	0	0	0	0	625	656	694	587	571	635	607	662	664
527	7.812	517.298	no MS2: NCGC00380976-01_C28H42N2O7_(4E,10E)-13,20-Dihydroxy-8,14-dimethoxy-4,10,12,16-tetramethyl-3-oxo-2-azabicyclo[16.3.1]docosa-1(22),4,10,18,20-pentaen-9-yl carbamate	[M-H]-	null	0.91	False	-1	517.292	C28H42N2O7	Macrolactams	HUXWGTSMSXMDBH-CWNVEXOKSA-N	COC1CC\C=C(/C)C(=O)NC2=CC(=CC(=C2)O)CC(C)CC(OC)C(O)C(C)\C=C(C)\C1OC(N)=O	530	False	True	False	Normalized unit: Intensity; Annotation method: MSMS-Public_all-neg-VS19_1	False	False	527	0	0	0.95	-1	-1	-1	-1	-1	0.95	1532.02	QC_1-1_neg_009	517.29523:1621 518.29989:482 519.30456:0	null	0	0	0	0	0	0	3717	3544	3442	3419	3383	3433	3385	3244	3411
528	8.344	517.326	no MS2: Ganoderic acid C 2	[M-H]-	null	0.07	False	-1	517.317	C30H46O7	Triterpenoids	RERVSJVGWKIGTJ-RQLZKMEDSA-N	O=C(O)C(C)CC(=O)CC(C)C1CC(O)C2(C3=C(C(=O)CC12C)C4(C)CCC(O)C(C)(C)C4CC3O)C	530	False	True	False	Normalized unit: Intensity; Annotation method: MSMS-Public_all-neg-VS19_1	False	False	528	0	0	1	-1	-1	-1	-1	-1	1	1023.71	Plasma_002_neg_015	517.31738:1126 518.32205:261 519.32672:0	null	0	0	0	0	0	0	38	2496	22	0	0	2189	0	716	0
529	7.983	518.298	Unknown	[M-H]-	null	0.07	False	null	null	null	null	null	null	999	False	False	False	Normalized unit: Intensity	False	False	529	0	0	null	null	null	null	null	null	null	742.13	Plasma_045_neg_076	518.29761:1846 519.30228:517 520.30694:946	null	0	0	0	0	0	0	103	0	18	0	0	17	248	2029	413
530	8.177	518.298	Unknown	[M-H]-	null	0.03	False	null	null	null	null	null	null	999	False	False	False	Normalized unit: Intensity	False	False	530	0	0	null	null	null	null	null	null	null	1194.36	Plasma_045_neg_076	518.29828:2455 519.30295:667 520.30761:0	null	0	0	0	0	0	0	65	0	19	0	0	0	105	525	530
531	0.665	518.615	Unknown	[M-H]-	null	0.91	False	null	null	null	null	null	null	999	False	False	False	Normalized unit: Intensity	False	False	531	0	0	null	null	null	null	null	null	null	1262.25	QC_2-3_neg_056	518.61530:1501 519.61996:0 520.62463:0	null	0	0	0	0	0	0	1360	1457	1294	1351	1407	1340	1285	1277	1274
532	7.955	520.306	Unknown	[M-H]-	null	0.6	False	null	null	null	null	null	null	999	False	False	False	Normalized unit: Intensity	False	False	532	0	0	null	null	null	null	null	null	null	1458.84	Plasma_008_neg_022	520.30609:4016 521.31076:1091 522.31543:290	null	0	0	0	0	0	0	1192	964	46	242	87	1022	1089	10382	2891
533	8.08	520.313	Unknown	[M-H]-	null	0.65	False	null	null	null	null	null	null	999	False	False	False	Normalized unit: Intensity	False	False	533	0	0	null	null	null	null	null	null	null	1781.54	Plasma_045_neg_076	520.31299:4932 521.31766:1404 522.32232:316	null	0	0	0	0	0	0	1491	829	484	14	0	1122	944	7157	2269
534	7.859	520.313	Unknown	[M-H]-	null	0.16	False	null	null	null	null	null	null	999	False	False	False	Normalized unit: Intensity	False	False	534	0	0	null	null	null	null	null	null	null	2188.14	Plasma_045_neg_076	520.31342:5355 521.31808:1473 522.32275:308	null	0	0	0	0	0	0	3684	1973	881	593	87	1749	1475	17413	3768
535	0.665	520.613	Unknown	[M-H]-	null	0.91	False	null	null	null	null	null	null	999	False	False	False	Normalized unit: Intensity	False	False	535	0	0	null	null	null	null	null	null	null	977.21	QC_3-3_neg_057	520.61328:1205 521.61795:0 522.62262:0	null	0	0	0	0	0	0	941	1075	1002	1009	1073	990	983	963	920
536	0.617	520.92	Unknown	[M-H]-	null	0.91	False	null	null	null	null	null	null	999	False	False	False	Normalized unit: Intensity	False	False	536	0	0	null	null	null	null	null	null	null	3395.11	Plasma_036_neg_066	520.91998:8816 521.92465:701 522.92932:338	null	0	0	0	0	0	0	13431	13554	11987	15953	15658	14715	14511	13142	15187
537	7.088	521.302	no MS2: 4-({5-[5-hydroxy-3-({[(2Z)-2-methylbut-2-enoyl]oxy}methyl)pentyl]-8a-(hydroxymethyl)-5,6-dimethyl-3,4,4a,5,6,7,8,8a-octahydronaphthalen-1-yl}methoxy)-4-oxobutanoic acid	[M-H]-	null	0.03	False	-1	521.312	C29H46O8	Colensane and clerodane diterpenoids	OVBBFGXDDIFFMB-SDPNRITHSA-N	O=C(OCC(CCO)CCC1(C)C(C)CCC2(C(=CCCC21)COC(=O)CCC(=O)O)CO)C(=CC)C	530	False	True	False	Normalized unit: Intensity; Annotation method: MSMS-Public_all-neg-VS19_1	False	False	537	0	0	0.65	-1	-1	-1	-1	-1	0.65	972.13	Plasma_029_neg_052	521.30243:1174 522.30710:371 523.31176:0	null	0	0	0	0	0	0	20	455	350	17	0	2034	162	40	20
538	7.812	525.327	Unknown	[M-H]-	null	0.9	False	null	null	null	null	null	null	999	False	False	False	Normalized unit: Intensity	False	False	538	0	0	null	null	null	null	null	null	null	18386.5	Plasma_001_neg_014	525.32690:19816 526.33157:6638 527.33624:1230	null	0	0	0	0	0	0	49528	47829	47100	46636	47006	45258	43650	38064	43485
539	7.799	525.475	Unknown	[M-H]-	null	0.06	False	null	null	null	null	null	null	999	False	False	False	Normalized unit: Intensity	False	False	539	0	0	null	null	null	null	null	null	null	923.73	QC_1-4_neg_080	525.47540:840 526.48007:0 527.48474:0	null	0	0	0	0	0	0	319	249	51	273	300	150	262	55	216
540	6.118	526.25	Unknown	[M-H]-	null	0.19	False	null	null	null	null	null	null	999	False	False	False	Normalized unit: Intensity	False	False	540	0	0	null	null	null	null	null	null	null	1248.59	Plasma_005_neg_018	526.25018:3769 527.25485:1270 528.25952:2111	null	0	0	0	0	0	0	2586	817	911	1682	9852	2973	1084	856	2024
541	6.572	526.251	Unknown	[M-H]-	null	0.03	False	null	null	null	null	null	null	999	False	False	False	Normalized unit: Intensity	False	False	541	0	0	null	null	null	null	null	null	null	829.94	Plasma_005_neg_018	526.25092:861 527.25558:0 528.26025:0	null	0	0	0	0	0	0	285	25	0	0	1879	399	0	0	87
542	5.798	526.289	Unknown	[M-H]-	null	0.01	False	null	null	null	null	null	null	999	False	False	False	Normalized unit: Intensity	False	False	542	0	0	null	null	null	null	null	null	null	1069.06	Plasma_045_neg_076	526.28882:1118 527.29349:0 528.29815:0	null	0	0	0	0	0	0	0	0	0	0	0	0	74	30	18
543	10.211	526.301	Unknown	[M-H]-	null	0.04	False	null	null	null	null	null	null	999	False	False	False	Normalized unit: Intensity	False	False	543	0	0	null	null	null	null	null	null	null	8.57	Plasma_033_neg_062	526.30103:1315 527.30569:416 528.31036:0	null	0	0	0	0	0	0	2084	1610	0	0	315	131	2077	175	1176
544	9.518	526.318	no MS2: Phosphatidylcholine lyso 14:0	[M+CH3COO]-	null	0.82	False	1.97	526.315	C22H46NO7P	2-acyl-sn-glycero-3-phosphocholines	IGZPHNNYPPAPLA-UHFFFAOYSA-N	CCCCCCCCCCCCCC(=O)OC(CO)COP([O-1])(=O)OCC[N+1](C)(C)C	530	False	True	False	Normalized unit: Intensity; Annotation method: MSMS-Public_all-neg-VS19_1	False	False	544	0	0	1	-1	-1	-1	-1	-1	1	818.24	QC_3-1_neg_011	526.31549:2673 527.32016:649 528.32483:189	null	0	0	0	0	0	0	6428	3411	1256	2057	1947	4433	8075	32743	8048
545	10.39	526.355	Unknown	[M-H]-	null	0.57	False	null	null	null	null	null	null	999	False	False	False	Normalized unit: Intensity	False	False	545	0	0	null	null	null	null	null	null	null	402.38	Plasma_008_neg_022	526.35522:3063 527.35989:951 528.36456:0	null	0	0	0	0	0	0	4099	780	111	282	868	3115	6060	13154	2166
546	0.629	526.857	Unknown	[M-H]-	null	0.91	False	null	null	null	null	null	null	999	False	False	False	Normalized unit: Intensity	False	False	546	0	0	null	null	null	null	null	null	null	1329.08	Plasma_003_neg_016	526.85687:1507 527.86154:0 528.86621:0	null	0	0	0	0	0	0	1135	1219	1214	1151	1132	1082	1142	1207	1312
547	6.11	528.265	no MS2: NCGC00381051-01_C29H39NO8_2-(4-Hydroxy-6-methoxy-1-oxo-5-{[(2E,6Z)-3,7,11-trimethyl-2,6,10-dodecatrien-1-yl]oxy}-1,3-dihydro-2H-isoindol-2-yl)pentanedioic acid	[M-H]-	null	0.13	False	-1	528.26	C29H39NO8	Glutamic acid and derivatives	XVPVYSHSGBUSAR-RPGLOVOBSA-N	COC1=CC2=C(CN(C(CCC(O)=O)C(O)=O)C2=O)C(=C1OC\C=C(C)\CC\C=C(C)/CCC=C(C)C)O	530	False	True	False	Normalized unit: Intensity; Annotation method: MSMS-Public_all-neg-VS19_1	False	False	547	0	0	0.95	-1	-1	-1	-1	-1	0.95	507.52	Plasma_001_neg_014	528.26379:1743 529.26846:604 530.27313:240	null	0	0	0	0	0	0	4305	1687	508	1087	6427	3273	167	183	3050
548	6.44	528.266	no MS2: NCGC00381051-01_C29H39NO8_2-(4-Hydroxy-6-methoxy-1-oxo-5-{[(2E,6Z)-3,7,11-trimethyl-2,6,10-dodecatrien-1-yl]oxy}-1,3-dihydro-2H-isoindol-2-yl)pentanedioic acid	[M-H]-	null	0.01	False	-1	528.26	C29H39NO8	Glutamic acid and derivatives	XVPVYSHSGBUSAR-RPGLOVOBSA-N	COC1=CC2=C(CN(C(CCC(O)=O)C(O)=O)C2=O)C(=C1OC\C=C(C)\CC\C=C(C)/CCC=C(C)C)O	530	False	True	False	Normalized unit: Intensity; Annotation method: MSMS-Public_all-neg-VS19_1	False	False	548	0	0	0.87	-1	-1	-1	-1	-1	0.87	6.26	Plasma_005_neg_018	528.26599:1033 529.27066:342 530.27533:0	null	0	0	0	0	0	0	343	134	0	259	3260	26	40	0	574
549	7.005	528.27	no MS2: NCGC00381051-01_C29H39NO8_2-(4-Hydroxy-6-methoxy-1-oxo-5-{[(2E,6Z)-3,7,11-trimethyl-2,6,10-dodecatrien-1-yl]oxy}-1,3-dihydro-2H-isoindol-2-yl)pentanedioic acid	[M-H]-	null	0.01	False	-1	528.26	C29H39NO8	Glutamic acid and derivatives	XVPVYSHSGBUSAR-RPGLOVOBSA-N	COC1=CC2=C(CN(C(CCC(O)=O)C(O)=O)C2=O)C(=C1OC\C=C(C)\CC\C=C(C)/CCC=C(C)C)O	530	False	True	False	Normalized unit: Intensity; Annotation method: MSMS-Public_all-neg-VS19_1	False	False	549	0	0	0.64	-1	-1	-1	-1	-1	0.64	21.37	Plasma_030_neg_053	528.27032:7254 529.27499:1883 530.27966:770	null	0	0	0	0	0	0	85	18	0	0	959	0	0	0	0
550	6.617	528.271	no MS2: NCGC00381051-01_C29H39NO8_2-(4-Hydroxy-6-methoxy-1-oxo-5-{[(2E,6Z)-3,7,11-trimethyl-2,6,10-dodecatrien-1-yl]oxy}-1,3-dihydro-2H-isoindol-2-yl)pentanedioic acid	[M-H]-	null	0.03	False	-1	528.26	C29H39NO8	Glutamic acid and derivatives	XVPVYSHSGBUSAR-RPGLOVOBSA-N	COC1=CC2=C(CN(C(CCC(O)=O)C(O)=O)C2=O)C(=C1OC\C=C(C)\CC\C=C(C)/CCC=C(C)C)O	530	False	True	False	Normalized unit: Intensity; Annotation method: MSMS-Public_all-neg-VS19_1	False	False	550	0	0	0.91	-1	-1	-1	-1	-1	0.91	7.67	Plasma_005_neg_018	528.26501:1031 529.26968:235 530.27435:0	null	0	0	0	0	0	0	35	0	0	0	2149	0	0	0	0
551	7.143	528.271	Unknown	[M-H]-	null	0.01	False	null	null	null	null	null	null	999	False	False	False	Normalized unit: Intensity	False	False	551	0	0	null	null	null	null	null	null	null	4.38	Plasma_030_neg_053	528.27112:1652 529.27579:522 530.28045:0	null	0	0	0	0	0	0	0	0	0	0	0	0	0	0	0
552	9.727	528.311	no MS2: Phosphatidylethanolamine lyso 22:4	[M-H]-	null	0.76	False	2.32	528.31	C27H48NO7P	2-acyl-sn-glycero-3-phosphoethanolamines	FGMFOVUNMMIBGB-SNPVRQPZSA-N	CCCCCCCCC=CCC=CCC=CCC=CCCC(=O)OC(CO)COP(O)(=O)OCCN	530	False	True	False	Normalized unit: Intensity; Annotation method: MSMS-Public_all-neg-VS19_1	False	False	552	0	0	1	-1	-1	-1	-1	-1	1	1174.66	QC_1-1_neg_009	528.30939:2117 529.31405:698 530.31872:157	null	0	0	0	0	0	0	9218	6838	1176	1398	1751	4278	5155	5951	5304
553	10.086	530.305	Unknown	[M-H]-	null	0.09	False	null	null	null	null	null	null	999	False	False	False	Normalized unit: Intensity	False	False	553	0	0	null	null	null	null	null	null	null	1004.22	Plasma_012_neg_027	530.30481:1202 531.30948:302 532.31415:0	null	0	0	0	0	0	0	1363	1870	1492	3284	3319	2335	802	1316	892
554	9.875	530.305	Unknown	[M-H]-	null	0.01	False	null	null	null	null	null	null	999	False	False	False	Normalized unit: Intensity	False	False	554	0	0	null	null	null	null	null	null	null	1019.81	Plasma_008_neg_022	530.30511:969 531.30978:256 532.31445:0	null	0	0	0	0	0	0	307	28	0	0	0	51	1131	3471	630
555	0.593	530.87	no MS2: PFSA-Cl; C8HCl2F15O3S	[M-H]-	null	0.03	False	-1	530.871	C8HCl2F15O3S	Organosulfonic acids	UVDYXALMMAGTAG-UHFFFAOYSA-N	O=S(=O)(O)C(F)(F)C(F)(F)C(F)(F)C(F)(F)C(F)(Cl)C(F)(F)C(F)(Cl)C(F)(F)F	530	False	True	False	Normalized unit: Intensity; Annotation method: MSMS-Public_all-neg-VS19_1	False	False	555	0	0	1	-1	-1	-1	-1	-1	1	846.66	Plasma_008_neg_022	530.87042:909 531.87509:0 532.87976:0	null	0	0	0	0	0	0	1216	1149	1153	890	976	1090	1035	1223	890
556	7.622	531.309	Unknown	[M-H]-	null	0.01	False	null	null	null	null	null	null	999	False	False	False	Normalized unit: Intensity	False	False	556	0	0	null	null	null	null	null	null	null	1119	Plasma_033_neg_062	531.30902:1203 532.31369:458 533.31836:0	null	0	0	0	0	0	0	0	23	0	0	273	0	0	0	0
557	0.561	532.881	Unknown	[M-H]-	null	0.84	False	null	null	null	null	null	null	999	False	False	False	Normalized unit: Intensity	False	False	557	0	0	null	null	null	null	null	null	null	1320.3	Plasma_017_neg_038	532.88123:1978 533.88589:707 534.89056:683	null	0	0	0	0	0	0	2670	3416	4298	1943	1732	1162	2413	2122	1507
558	5.542	534.801	Unknown	[M-H]-	null	0.01	False	null	null	null	null	null	null	999	False	False	False	Normalized unit: Intensity	False	False	558	0	0	null	null	null	null	null	null	null	838.06	Plasma_006_neg_020	534.80109:964 535.80575:0 536.81042:0	null	0	0	0	0	0	0	0	0	0	0	0	1590	0	0	0
559	7.068	536.311	Unknown	[M-H]-	null	0.01	False	null	null	null	null	null	null	999	False	False	False	Normalized unit: Intensity	False	False	559	0	0	null	null	null	null	null	null	null	1168.88	Plasma_045_neg_076	536.31061:1169 537.31528:296 538.31994:0	null	0	0	0	0	0	0	21	0	37	0	0	0	48	184	79
560	0.619	536.892	Unknown	[M-H]-	null	0.91	False	null	null	null	null	null	null	999	False	False	False	Normalized unit: Intensity	False	False	560	0	0	null	null	null	null	null	null	null	4297.22	Plasma_030_neg_053	536.89227:4789 537.89694:467 538.90161:541	null	0	0	0	84	17	0	7418	6993	7686	8082	8158	7990	7907	8426	7746
561	7.645	537.297	Unknown	[M-H]-	null	0.01	False	null	null	null	null	null	null	999	False	False	False	Normalized unit: Intensity	False	False	561	0	0	null	null	null	null	null	null	null	1801.81	Plasma_033_neg_062	537.29669:1739 538.30136:571 539.30603:0	null	0	0	0	0	0	0	0	584	0	0	0	57	67	153	0
562	7.832	537.298	Unknown	[M-H]-	null	0.01	False	null	null	null	null	null	null	999	False	False	False	Normalized unit: Intensity	False	False	562	0	0	null	null	null	null	null	null	null	1602.19	Plasma_033_neg_062	537.29852:1652 538.30319:615 539.30786:0	null	0	0	0	0	0	0	0	184	0	0	0	0	102	33	0
563	9.311	538.318	Unknown	[M-H]-	null	0.91	False	null	null	null	null	null	null	999	False	False	False	Normalized unit: Intensity	False	False	563	0	0	null	null	null	null	null	null	null	7829.61	Plasma_008_neg_022	538.31763:31035 539.32229:9021 540.32696:1768	null	0	0	0	0	0	0	41567	16506	7236	11636	10151	10309	42773	92258	31092
564	9.12	538.318	Unknown	[M-H]-	null	0.21	False	null	null	null	null	null	null	999	False	False	False	Normalized unit: Intensity	False	False	564	0	0	null	null	null	null	null	null	null	1137.82	Plasma_008_neg_022	538.31787:3209 539.32254:824 540.32721:0	null	0	0	0	0	0	0	2853	628	260	740	698	504	2954	8394	2495
565	5.221	539.272	Unknown	[M-H]-	null	0.06	False	null	null	null	null	null	null	999	False	False	False	Normalized unit: Intensity	False	False	565	0	0	null	null	null	null	null	null	null	919.94	Plasma_015_neg_030	539.27209:1636 540.27676:462 541.28143:0	null	0	0	0	0	0	0	15	607	0	0	0	2162	0	0	0
566	9.867	540.334	no MS2: LPC 16:0; PlaSMA ID-1486	[M+HCOO]-	null	0.91	False	9.91	540.331	C24H50NO7P	Lipids	ASWBNKHCZGQVJV-UHFFFAOYNA-N	O=C(OCC(O)COP(=O)([O-])OCC[N+](C)(C)C)CCCCCCCCCCCCCCC	530	False	True	False	Normalized unit: Intensity; Annotation method: MSMS-Public_all-neg-VS19_1	False	False	566	0	0	1	-1	-1	-1	-1	-1	1	1556.85	QC_2-1_neg_010	540.33087:12493 541.33554:3455 542.34021:813	null	0	0	0	0	0	0	33836	20365	6747	11365	11382	16624	40334	140464	44175
567	10.082	540.334	no MS2: LPC 16:0; PlaSMA ID-1486	[M+HCOO]-	null	0.91	False	9.91	540.331	C24H50NO7P	Lipids	ASWBNKHCZGQVJV-UHFFFAOYNA-N	O=C(OCC(O)COP(=O)([O-])OCC[N+](C)(C)C)CCCCCCCCCCCCCCC	530	False	True	False	Normalized unit: Intensity; Annotation method: MSMS-Public_all-neg-VS19_1	False	False	567	0	0	1	-1	-1	-1	-1	-1	1	14129	QC_1-1_neg_009	540.33112:81303 541.33578:22933 542.34045:4415	null	470	422	74	0	267	516	321773	223678	93773	137305	140836	202510	348612	619241	357173
568	10.088	540.458	no MS2: Cer[NS] d30:1	[M+CH3COO]-	null	0.19	False	8.445	540.463	C30H59NO3	Ceramides	HXFPPRPLRSPNIB-WJTDDFOZSA-N	CCCCCCCCCCCCC\C=C\C(O)C(CO)NC(=O)CCCCCCCCCCC	530	False	True	False	Normalized unit: Intensity; Annotation method: MSMS-Public_all-neg-VS19_1	False	False	568	0	0	0.87	-1	-1	-1	-1	-1	0.87	1439.71	Plasma_023_neg_045	540.45758:2257 541.46225:675 542.46692:0	null	0	0	0	0	0	0	5192	3014	438	1456	254	3623	2153	515	1585
569	9.857	540.466	no MS2: Cer[NS] d30:1	[M+CH3COO]-	null	0.01	False	8.445	540.463	C30H59NO3	Ceramides	HXFPPRPLRSPNIB-WJTDDFOZSA-N	CCCCCCCCCCCCC\C=C\C(O)C(CO)NC(=O)CCCCCCCCCCC	530	False	True	False	Normalized unit: Intensity; Annotation method: MSMS-Public_all-neg-VS19_1	False	False	569	0	0	0.96	-1	-1	-1	-1	-1	0.96	1116.44	Plasma_045_neg_076	540.46649:1804 541.47116:0 542.47583:0	null	0	0	0	0	0	0	0	0	0	0	0	0	27	403	52
570	10.073	540.483	Unknown	[M-H]-	null	0.24	False	null	null	null	null	null	null	999	False	False	False	Normalized unit: Intensity	False	False	570	0	0	null	null	null	null	null	null	null	2168.62	QC_3-4_neg_082	540.48291:5767 541.48758:1193 542.49225:0	null	0	0	0	0	0	0	1009	485	146	105	723	1280	2063	382	1966
571	10.1	540.505	Unknown	[M-H]-	null	0.01	False	null	null	null	null	null	null	999	False	False	False	Normalized unit: Intensity	False	False	571	0	0	null	null	null	null	null	null	null	1238.31	Plasma_007_neg_021	540.50513:1373 541.50979:388 542.51446:0	null	0	0	0	0	0	0	584	473	332	259	182	154	2705	1525	754
572	9.627	544.277	Unknown	[M-H]-	null	0.01	False	null	null	null	null	null	null	999	False	False	False	Normalized unit: Intensity	False	False	572	0	0	null	null	null	null	null	null	null	856.56	Plasma_033_neg_062	544.27679:919 545.28146:0 546.28613:0	null	0	0	0	0	0	0	29	68	0	0	107	70	176	471	319
573	8.373	548.24	Unknown	[M-H]-	null	0.04	False	null	null	null	null	null	null	999	False	False	False	Normalized unit: Intensity	False	False	573	0	0	null	null	null	null	null	null	null	1750.81	Plasma_033_neg_062	548.23969:2710 549.24435:1095 550.24902:359	null	0	0	0	0	0	0	97	144	0	0	2626	0	455	0	0
574	0.561	548.857	Unknown	[M-H]-	null	0.91	False	null	null	null	null	null	null	999	False	False	False	Normalized unit: Intensity	False	False	574	0	0	null	null	null	null	null	null	null	2932.26	Plasma_014_neg_029	548.85748:3712 549.86215:767 550.86682:0	null	0	0	0	0	0	0	7988	8085	7353	5540	5881	6914	6869	7016	6593
575	9.844	552.333	no MS2: Phosphatidylcholine lyso 16:1	[M+CH3COO]-	null	0.25	False	2.03	552.331	C24H48NO7P	2-acyl-sn-glycero-3-phosphocholines	GMEZONVWGDDWOJ-NXVVXOECSA-N	CCCCCCCCCCCC=CCCC(=O)OC(CO)COP([O-1])(=O)OCC[N+1](C)(C)C	530	False	True	False	Normalized unit: Intensity; Annotation method: MSMS-Public_all-neg-VS19_1	False	False	575	0	0	0.99	-1	-1	-1	-1	-1	0.99	955.59	QC_3-1_neg_011	552.33191:959 553.33658:237 554.34124:0	null	0	0	0	0	0	0	2990	1137	63	22	41	522	1727	6187	718
576	10.707	552.371	Unknown	[M-H]-	null	0.5	False	null	null	null	null	null	null	999	False	False	False	Normalized unit: Intensity	False	False	576	0	0	null	null	null	null	null	null	null	1316.45	Plasma_008_neg_022	552.37128:2800 553.37594:863 554.38061:0	null	0	0	0	0	0	0	1171	1040	0	18	640	1083	5021	10727	3905
577	0.619	552.862	Unknown	[M-H]-	null	0.88	False	null	null	null	null	null	null	999	False	False	False	Normalized unit: Intensity	False	False	577	0	0	null	null	null	null	null	null	null	1098.38	Plasma_008_neg_022	552.86157:1521 553.86624:0 554.87091:216	null	0	0	0	0	0	0	1705	1616	2084	1801	1817	1860	1879	2343	1651
578	9.696	554.308	Unknown	[M-H]-	null	0.49	False	null	null	null	null	null	null	999	False	False	False	Normalized unit: Intensity	False	False	578	0	0	null	null	null	null	null	null	null	663.45	Plasma_019_neg_040	554.30750:1334 555.31216:370 556.31683:0	null	0	0	0	0	0	0	4435	2917	812	1327	1378	3942	1994	929	3934
579	5.836	554.32	Unknown	[M-H]-	null	0.1	False	null	null	null	null	null	null	999	False	False	False	Normalized unit: Intensity	False	False	579	0	0	null	null	null	null	null	null	null	322.15	Plasma_045_neg_076	554.32013:2659 555.32480:707 556.32946:0	null	0	0	0	0	0	0	66	15	18	0	0	131	472	6358	253
580	10.675	554.351	no MS2: Phosphatidylcholine lyso 16:0	[M+CH3COO]-	null	0.85	False	2.39	554.346	C24H50NO7P	2-acyl-sn-glycero-3-phosphocholines	NEGQHKSYEYVFTD-UHFFFAOYSA-N	CCCCCCCCCCCCCCCC(=O)OC(CO)COP([O-1])(=O)OCC[N+1](C)(C)C	530	False	True	False	Normalized unit: Intensity; Annotation method: MSMS-Public_all-neg-VS19_1	False	False	580	0	0	1	-1	-1	-1	-1	-1	1	813.33	QC_1-1_neg_009	554.34668:3789 555.35135:1192 556.35602:264	null	0	0	0	0	0	0	12319	6109	1087	1058	2967	8705	9509	43848	12304
581	0.58	554.87	Unknown	[M-H]-	null	0.88	False	null	null	null	null	null	null	999	False	False	False	Normalized unit: Intensity	False	False	581	0	0	null	null	null	null	null	null	null	1045.47	Plasma_002_neg_015	554.86963:1540 555.87430:400 556.87896:391	null	0	0	0	0	0	0	793	869	847	553	563	711	612	582	669
582	7.47	555.317	no MS2: NCGC00380113-01!2,3,14-trihydroxy-10,13-dimethyl-17-(2,3,6,7-tetrahydroxy-5,6-dimethylheptan-2-yl)-2,3,4,5,9,11,12,15,16,17-decahydro-1H-cyclopenta[a]phenanthren-6-one	[M+HCOO]-	null	0.71	False	-1	555.317	C28H46O8	Hydroxy bile acids, alcohols and derivatives	GGLFMIALTLLMEJ-UHFFFAOYSA-N	CC(CC(O)C(C)(O)C1CCC2(O)C3=CC(=O)C4CC(O)C(O)CC4(C)C3CCC12C)C(C)(O)CO	530	False	True	False	Normalized unit: Intensity; Annotation method: MSMS-Public_all-neg-VS19_1	False	False	582	0	0	1	-1	-1	-1	-1	-1	1	2435.06	Plasma_029_neg_052	555.31738:2387 556.32205:875 557.32672:290	null	0	0	0	0	0	0	4910	6572	1236	1808	12701	1869	5417	42	654
583	10.403	556.323	Unknown	[M-H]-	null	0.16	False	null	null	null	null	null	null	999	False	False	False	Normalized unit: Intensity	False	False	583	0	0	null	null	null	null	null	null	null	561.07	QC_4-2_neg_035	556.32288:1135 557.32754:292 558.33221:384	null	0	0	0	0	0	0	1828	946	395	622	762	2266	2820	2695	2489
584	11.275	558.344	Unknown	[M-H]-	null	0.01	False	null	null	null	null	null	null	999	False	False	False	Normalized unit: Intensity	False	False	584	0	0	null	null	null	null	null	null	null	809.69	Plasma_041_neg_072	558.34418:847 559.34884:0 560.35351:0	null	0	0	0	0	0	0	502	224	342	88	966	966	1223	906	1068
585	0.665	558.602	Unknown	[M-H]-	null	0.5	False	null	null	null	null	null	null	999	False	False	False	Normalized unit: Intensity	False	False	585	0	0	null	null	null	null	null	null	null	860.88	Plasma_036_neg_066	558.60242:1173 559.60708:0 560.61175:0	null	0	0	0	0	0	0	679	842	637	868	858	820	727	665	783
586	0.665	560.6	Unknown	[M-H]-	null	0.91	False	null	null	null	null	null	null	999	False	False	False	Normalized unit: Intensity	False	False	586	0	0	null	null	null	null	null	null	null	1160.1	Plasma_036_neg_066	560.60040:1591 561.60507:0 562.60974:0	null	0	0	0	0	0	0	1194	1274	967	1240	1220	1201	1104	1023	1153
587	0.585	560.893	Unknown	[M-H]-	null	0.56	False	null	null	null	null	null	null	999	False	False	False	Normalized unit: Intensity	False	False	587	0	0	null	null	null	null	null	null	null	887.08	Plasma_017_neg_038	560.89252:1339 561.89718:372 562.90185:0	null	0	0	0	0	0	0	598	708	778	508	443	605	527	495	552
588	0.761	561.931	Unknown	[M-H]-	null	0.24	False	null	null	null	null	null	null	999	False	False	False	Normalized unit: Intensity	False	False	588	0	0	null	null	null	null	null	null	null	1006.85	Plasma_025_neg_047	561.93109:1602 562.93576:245 563.94043:0	null	0	0	0	0	0	0	1813	1061	791	1448	1130	879	1964	2300	1382
589	9.132	562.323	no MS2: LPC 18:3	[M+HCOO]-	null	0.81	False	8.75	562.315	C26H48NO7P	1-acyl-sn-glycero-3-phosphocholines	WKQNRCYKYCKESD-UHFFFAOYSA-N	O=C(OCC(O)COP(=O)([O-])OCC[N+](C)(C)C)CCCCCCCC=CCC=CCC=CCC	530	False	True	False	Normalized unit: Intensity; Annotation method: MSMS-Public_all-neg-VS19_1	False	False	589	0	0	1	-1	-1	-1	-1	-1	1	2900.5	QC_2-1_neg_010	562.31512:3407 563.31979:1143 564.32446:245	null	0	0	0	0	0	0	11155	4882	929	1049	131	8131	3861	13555	4572
590	9.236	562.324	no MS2: LPC 18:3	[M+HCOO]-	null	0.63	False	8.75	562.315	C26H48NO7P	1-acyl-sn-glycero-3-phosphocholines	WKQNRCYKYCKESD-UHFFFAOYSA-N	O=C(OCC(O)COP(=O)([O-])OCC[N+](C)(C)C)CCCCCCCC=CCC=CCC=CCC	530	False	True	False	Normalized unit: Intensity; Annotation method: MSMS-Public_all-neg-VS19_1	False	False	590	0	0	1	-1	-1	-1	-1	-1	1	2400.6	QC_1-1_neg_009	562.31470:2335 563.31937:773 564.32403:0	null	0	0	0	0	0	0	14082	6114	1103	2842	716	1668	8642	14690	4880
591	0.665	562.593	Unknown	[M-H]-	null	0.88	False	null	null	null	null	null	null	999	False	False	False	Normalized unit: Intensity	False	False	591	0	0	null	null	null	null	null	null	null	994.87	Plasma_016_neg_037	562.59320:1431 563.59787:0 564.60254:0	null	0	0	0	0	0	0	959	1065	851	1068	1078	1054	950	793	1024
592	9.515	564.333	no MS2: LPC 18:2	[M+HCOO]-	null	0.91	False	9.29	564.331	C26H50NO7P	1-acyl-sn-glycero-3-phosphocholines	SPJFYYJXNPEZDW-UHFFFAOYSA-N	O=C(OCC(O)COP(=O)([O-])OCC[N+](C)(C)C)CCCCCCCC=CCC=CCCCCC	530	False	True	False	Normalized unit: Intensity; Annotation method: MSMS-Public_all-neg-VS19_1	False	False	592	0	0	1	-1	-1	-1	-1	-1	1	7163.22	QC_1-1_neg_009	564.33069:13239 565.33536:4105 566.34002:787	null	0	0	0	0	0	0	37478	18920	4946	8367	9592	28346	23657	53882	31690
593	9.696	564.334	no MS2: LPC 18:2	[M+HCOO]-	null	0.91	False	9.29	564.331	C26H50NO7P	1-acyl-sn-glycero-3-phosphocholines	SPJFYYJXNPEZDW-UHFFFAOYSA-N	O=C(OCC(O)COP(=O)([O-])OCC[N+](C)(C)C)CCCCCCCC=CCC=CCCCCC	530	False	True	False	Normalized unit: Intensity; Annotation method: MSMS-Public_all-neg-VS19_1	False	False	593	0	0	1	-1	-1	-1	-1	-1	1	36052.5	QC_1-1_neg_009	564.33087:64896 565.33554:19478 566.34021:4013	null	0	0	0	0	0	0	232462	124668	31919	53704	51641	172582	151424	308999	175539
594	9.696	564.461	Unknown	[M-H]-	null	0.13	False	null	null	null	null	null	null	999	False	False	False	Normalized unit: Intensity	False	False	594	0	0	null	null	null	null	null	null	null	1300.49	Plasma_035_neg_064	564.46100:2582 565.46567:917 566.47033:0	null	0	0	0	0	0	0	807	457	71	258	817	465	369	1877	1114
595	9.51	564.476	Unknown	[M-H]-	null	0.01	False	null	null	null	null	null	null	999	False	False	False	Normalized unit: Intensity	False	False	595	0	0	null	null	null	null	null	null	null	920.25	Plasma_036_neg_066	564.47589:1392 565.48056:0 566.48523:0	null	0	0	0	0	0	0	55	0	0	0	0	0	0	50	29
596	9.691	564.485	Unknown	[M-H]-	null	0.44	False	null	null	null	null	null	null	999	False	False	False	Normalized unit: Intensity	False	False	596	0	0	null	null	null	null	null	null	null	1884.99	Plasma_041_neg_072	564.48462:6095 565.48929:1165 566.49395:0	null	0	0	0	0	0	0	249	114	14	250	48	487	1195	698	587
597	0.561	564.837	Unknown	[M-H]-	null	0.91	False	null	null	null	null	null	null	999	False	False	False	Normalized unit: Intensity	False	False	597	0	0	null	null	null	null	null	null	null	2559.05	Plasma_025_neg_047	564.83752:3813 565.84219:424 566.84686:197	null	0	0	0	0	0	0	8539	7040	4683	5771	7075	7252	7249	8520	3763
598	7.221	565.229	no MS2: NCGC00385824-01!methyl 2,4,10-triacetyloxy-5,9-dihydroxy-1,4a-dimethyl-7-propan-2-yl-2,3,4,9,10,10a-hexahydrophenanthrene-1-carboxylate	[M+HCOO]-	null	0.04	False	-1	565.229	C27H36O10	1-hydroxysteroids	CDYGRHOHQUXDMN-UHFFFAOYSA-N	COC(=O)C1(C)C(CC(OC(C)=O)C2(C)C1C(OC(C)=O)C(O)C3=C2C(O)=CC(=C3)C(C)C)OC(C)=O	530	False	True	False	Normalized unit: Intensity; Annotation method: MSMS-Public_all-neg-VS19_1	False	False	598	0	0	1	-1	-1	-1	-1	-1	1	951.69	QC_1-1_neg_009	565.22900:977 566.23367:388 567.23834:0	null	0	0	0	0	0	0	1524	1012	2077	963	1210	753	1011	682	1976
599	10.642	566.351	no MS2: Phosphatidylcholine lyso 17:1	[M+CH3COO]-	null	0.01	False	2.36	566.346	C25H50NO7P	2-acyl-sn-glycero-3-phosphocholines	WRNNGLADZYOSJO-MSUUIHNZSA-N	CCCCCCCCCCCCC=CCCC(=O)OC(CO)COP([O-1])(=O)OCC[N+1](C)(C)C	530	False	True	False	Normalized unit: Intensity; Annotation method: MSMS-Public_all-neg-VS19_1	False	False	599	0	0	0.93	-1	-1	-1	-1	-1	0.93	30.44	Plasma_008_neg_022	566.35059:2973 567.35525:986 568.35992:231	null	0	0	0	0	0	0	1237	448	464	78	83	1685	1551	10813	1637
600	10.209	566.357	no MS2: Phosphatidylcholine lyso 17:1	[M+CH3COO]-	null	0.91	False	2.36	566.346	C25H50NO7P	2-acyl-sn-glycero-3-phosphocholines	WRNNGLADZYOSJO-MSUUIHNZSA-N	CCCCCCCCCCCCC=CCCC(=O)OC(CO)COP([O-1])(=O)OCC[N+1](C)(C)C	530	False	True	False	Normalized unit: Intensity; Annotation method: MSMS-Public_all-neg-VS19_1	False	False	600	0	0	1	-1	-1	-1	-1	-1	1	398.25	Plasma_002_neg_015	566.34662:3422 567.35129:1144 568.35595:290	null	0	0	0	0	0	0	21888	11785	4371	4418	9042	12184	15463	37035	13646
601	10.408	566.357	no MS2: Phosphatidylcholine lyso 17:1	[M+CH3COO]-	null	0.91	False	2.36	566.346	C25H50NO7P	2-acyl-sn-glycero-3-phosphocholines	WRNNGLADZYOSJO-MSUUIHNZSA-N	CCCCCCCCCCCCC=CCCC(=O)OC(CO)COP([O-1])(=O)OCC[N+1](C)(C)C	530	False	True	False	Normalized unit: Intensity; Annotation method: MSMS-Public_all-neg-VS19_1	False	False	601	0	0	1	-1	-1	-1	-1	-1	1	5744.39	QC_1-1_neg_009	566.34711:41903 567.35177:12825 568.35644:2594	null	0	0	0	0	0	0	176715	82469	32971	34610	40089	95175	118593	271538	103090
602	10.416	566.47	Unknown	[M-H]-	null	0.12	False	null	null	null	null	null	null	999	False	False	False	Normalized unit: Intensity	False	False	602	0	0	null	null	null	null	null	null	null	1001.87	QC_1-2_neg_032	566.46973:1195 567.47439:479 568.47906:0	null	0	0	0	0	0	0	2331	435	0	41	37	332	884	5774	397
603	10.4	566.501	Unknown	[M-H]-	null	0.1	False	null	null	null	null	null	null	999	False	False	False	Normalized unit: Intensity	False	False	603	0	0	null	null	null	null	null	null	null	1560.96	QC_3-4_neg_082	566.50128:3645 567.50595:0 568.51062:0	null	0	0	0	0	0	0	1088	124	0	18	0	554	1032	958	365
604	0.591	566.908	Unknown	[M-H]-	null	0.12	False	null	null	null	null	null	null	999	False	False	False	Normalized unit: Intensity	False	False	604	0	0	null	null	null	null	null	null	null	890.39	Plasma_017_neg_038	566.90839:1114 567.91305:282 568.91772:0	null	0	0	0	0	0	0	671	918	1028	601	635	703	616	527	859
605	7.385	567.318	no MS2: NCGC00381203-01_C31H46N4O7_2H-Pyrido[1,2-a][1,4,7,10]tetraazacyclododecine-1,4,7,10(3H,12H)-tetrone, 3-(7,8-dihydroxy-6-oxooctyl)octahydro-9-(1-methylpropyl)-6-(phenylmethyl)-	[M-H2O-H]-	null	0.03	False	-1	567.319	C31H46N4O7	Cyclic peptides	YSNRSVKJRYQIIA-UHFFFAOYSA-N	CCC(C)C1NC(=O)C(CC2=CC=CC=C2)NC(=O)C(CCCCCC(=O)C(O)CO)NC(=O)C3CCCCN3C1=O	530	False	True	False	Normalized unit: Intensity; Annotation method: MSMS-Public_all-neg-VS19_1	False	False	605	0	0	1	-1	-1	-1	-1	-1	1	851.55	Plasma_005_neg_018	567.31818:1717 568.32284:578 569.32751:0	null	0	0	0	0	0	0	554	0	113	17	3902	0	613	0	0
606	6.963	567.324	no MS2: NCGC00381203-01_C31H46N4O7_2H-Pyrido[1,2-a][1,4,7,10]tetraazacyclododecine-1,4,7,10(3H,12H)-tetrone, 3-(7,8-dihydroxy-6-oxooctyl)octahydro-9-(1-methylpropyl)-6-(phenylmethyl)-	[M-H2O-H]-	null	0.19	False	-1	567.319	C31H46N4O7	Cyclic peptides	YSNRSVKJRYQIIA-UHFFFAOYSA-N	CCC(C)C1NC(=O)C(CC2=CC=CC=C2)NC(=O)C(CCCCCC(=O)C(O)CO)NC(=O)C3CCCCN3C1=O	530	False	True	False	Normalized unit: Intensity; Annotation method: MSMS-Public_all-neg-VS19_1	False	False	606	0	0	1	-1	-1	-1	-1	-1	1	722.78	Plasma_003_neg_016	567.31860:2356 568.32327:741 569.32794:0	null	0	0	0	0	0	0	2341	4918	5589	1259	7182	3009	6527	159	6865
607	7.089	567.326	no MS2: NCGC00381203-01_C31H46N4O7_2H-Pyrido[1,2-a][1,4,7,10]tetraazacyclododecine-1,4,7,10(3H,12H)-tetrone, 3-(7,8-dihydroxy-6-oxooctyl)octahydro-9-(1-methylpropyl)-6-(phenylmethyl)-	[M-H2O-H]-	null	0.09	False	-1	567.319	C31H46N4O7	Cyclic peptides	YSNRSVKJRYQIIA-UHFFFAOYSA-N	CCC(C)C1NC(=O)C(CC2=CC=CC=C2)NC(=O)C(CCCCCC(=O)C(O)CO)NC(=O)C3CCCCN3C1=O	530	False	True	False	Normalized unit: Intensity; Annotation method: MSMS-Public_all-neg-VS19_1	False	False	607	0	0	1	-1	-1	-1	-1	-1	1	622.58	Plasma_005_neg_018	567.31860:2983 568.32327:986 569.32794:282	null	0	0	0	0	0	0	2007	1865	1885	142	7844	1537	2663	286	75
608	7.932	567.326	no MS2: NCGC00381203-01_C31H46N4O7_2H-Pyrido[1,2-a][1,4,7,10]tetraazacyclododecine-1,4,7,10(3H,12H)-tetrone, 3-(7,8-dihydroxy-6-oxooctyl)octahydro-9-(1-methylpropyl)-6-(phenylmethyl)-	[M-H2O-H]-	null	0.53	False	-1	567.319	C31H46N4O7	Cyclic peptides	YSNRSVKJRYQIIA-UHFFFAOYSA-N	CCC(C)C1NC(=O)C(CC2=CC=CC=C2)NC(=O)C(CCCCCC(=O)C(O)CO)NC(=O)C3CCCCN3C1=O	530	False	True	False	Normalized unit: Intensity; Annotation method: MSMS-Public_all-neg-VS19_1	False	False	608	0	0	1	-1	-1	-1	-1	-1	1	318.69	QC_4-1_neg_012	567.31879:1159 568.32345:389 569.32812:0	null	0	0	0	0	0	0	4822	6592	4256	1002	4601	540	5681	1992	1170
609	11.052	568.367	no MS2: Phosphatidylcholine lyso 17:0	[M+CH3COO]-	null	0.87	False	3.15	568.362	C25H52NO7P	2-acyl-sn-glycero-3-phosphocholines	ODFZXVWAVNPFPM-UHFFFAOYSA-N	CCCCCCCCCCCCCCCCC(=O)OC(CO)COP([O-1])(=O)OCC[N+1](C)(C)C	530	False	True	False	Normalized unit: Intensity; Annotation method: MSMS-Public_all-neg-VS19_1	False	False	609	0	0	0.99	-1	-1	-1	-1	-1	0.99	89.45	QC_1-1_neg_009	568.36328:7209 569.36795:2362 570.37262:445	null	0	0	0	0	0	0	25465	14118	4840	6328	6524	14516	21778	96786	30468
610	11.285	568.367	no MS2: Phosphatidylcholine lyso 17:0	[M+CH3COO]-	null	0.91	False	3.15	568.362	C25H52NO7P	2-acyl-sn-glycero-3-phosphocholines	ODFZXVWAVNPFPM-UHFFFAOYSA-N	CCCCCCCCCCCCCCCCC(=O)OC(CO)COP([O-1])(=O)OCC[N+1](C)(C)C	530	False	True	False	Normalized unit: Intensity; Annotation method: MSMS-Public_all-neg-VS19_1	False	False	610	0	0	0.99	-1	-1	-1	-1	-1	0.99	765.28	QC_1-1_neg_009	568.36328:50786 569.36795:15626 570.37262:3514	null	1467	677	245	0	801	1278	238637	156312	63671	79096	79036	164531	203864	486360	274202
611	11.288	568.497	no MS2: Cer[NS] d32:1	[M+CH3COO]-	null	0.1	False	9.012	568.495	C32H63NO3	Long-chain ceramides	ZKRPGPZHULJLKJ-IMVLJIQESA-N	CCCCCCCCCCCCC\C=C\C(O)C(CO)NC(=O)CCCCCCCCCCCCC	530	False	True	False	Normalized unit: Intensity; Annotation method: MSMS-Public_all-neg-VS19_1	False	False	611	0	0	0.98	-1	-1	-1	-1	-1	0.98	1045.43	Plasma_029_neg_052	568.49683:1361 569.50149:250 570.50616:0	null	0	0	0	0	0	0	46	370	63	31	214	183	174	259	328
612	11.281	568.516	no MS2: Cer[NS] d32:1	[M+CH3COO]-	null	0.28	False	9.012	568.495	C32H63NO3	Long-chain ceramides	ZKRPGPZHULJLKJ-IMVLJIQESA-N	CCCCCCCCCCCCC\C=C\C(O)C(CO)NC(=O)CCCCCCCCCCCCC	530	False	True	False	Normalized unit: Intensity; Annotation method: MSMS-Public_all-neg-VS19_1	False	False	612	0	0	0.76	-1	-1	-1	-1	-1	0.76	1736.98	Plasma_019_neg_040	568.50311:3181 569.50778:223 570.51245:0	null	0	0	0	0	0	0	2882	124	55	77	342	225	836	1627	731
613	0.632	568.843	Unknown	[M-H]-	null	0.15	False	null	null	null	null	null	null	999	False	False	False	Normalized unit: Intensity	False	False	613	0	0	null	null	null	null	null	null	null	835.77	Plasma_016_neg_037	568.84351:1132 569.84817:0 570.85284:0	null	0	0	0	0	0	0	551	505	512	619	593	614	624	698	534
614	8.063	570.309	Unknown	[M-H]-	null	0.01	False	null	null	null	null	null	null	999	False	False	False	Normalized unit: Intensity	False	False	614	0	0	null	null	null	null	null	null	null	6.04	Plasma_045_neg_076	570.30920:871 571.31387:0 572.31854:425	null	0	0	0	0	0	0	0	0	0	0	0	0	0	119	17
615	0.58	570.856	Unknown	[M-H]-	null	0.88	False	null	null	null	null	null	null	999	False	False	False	Normalized unit: Intensity	False	False	615	0	0	null	null	null	null	null	null	null	1268.2	Plasma_025_neg_047	570.85559:2198 571.86026:0 572.86493:347	null	0	0	0	0	0	0	1092	1010	742	806	957	1037	880	1113	805
616	10.258	571.293	no MS2: NCGC00380815-01_C31H42O7_5-Heptenoic acid, 2-[(4alpha,5alpha,6beta,8alpha,9beta,13alpha,14beta,16beta,17E)-16-(acetyloxy)-6-hydroxy-4,8,10,14-tetramethyl-3,7-dioxogon-1-en-17-ylidene]-6-methyl-, (2E)-	[M+HCOO]-	null	0.65	False	-1	571.291	C31H42O7	Steroid esters	ZGQQEJUGWPCCHA-IDDAUYTMSA-N	C[C@H]1[C@@H]2[C@H](O)C(=O)[C@@]3(C)[C@@H](CC[C@H]4\C([C@H](C[C@]34C)OC(C)=O)=C(\CCC=C(C)C)C(O)=O)[C@@]2(C)\C=C/C1=O	530	False	True	False	Normalized unit: Intensity; Annotation method: MSMS-Public_all-neg-VS19_1	False	False	616	0	0	1	-1	-1	-1	-1	-1	1	1864.38	Plasma_012_neg_027	571.29120:1010 572.29587:275 573.30053:0	null	0	0	0	0	0	0	2218	3831	407	874	30	1930	2889	36967	3276
617	11.282	571.376	Unknown	[M-H]-	null	0.01	False	null	null	null	null	null	null	999	False	False	False	Normalized unit: Intensity	False	False	617	0	0	null	null	null	null	null	null	null	952.38	Plasma_008_neg_022	571.37567:958 572.38034:0 573.38501:0	null	0	0	0	0	0	0	1847	601	18	18	12	218	614	4490	708
618	0.767	573.044	no MS2: DihydroFerulic_Acid4O_Sulfate	[2M-2H+Na]-	null	0.62	False	-1	573.035	C10H12O7S	Phenylsulfates	UMCDODPBPQMWQP-UHFFFAOYSA-N	COC1=C(OS(O)(=O)=O)C=CC(CCC(O)=O)=C1	530	False	True	False	Normalized unit: Intensity; Annotation method: MSMS-Public_all-neg-VS19_1	False	False	618	0	0	1	-1	-1	-1	-1	-1	1	247.49	Plasma_009_neg_023	573.03558:867 574.04025:0 575.04492:0	null	0	0	0	0	0	0	3572	1688	2178	1788	452	444	284	521	1345
619	0.664	574.576	Unknown	[M-H]-	null	0.91	False	null	null	null	null	null	null	999	False	False	False	Normalized unit: Intensity	False	False	619	0	0	null	null	null	null	null	null	null	1182.24	Plasma_022_neg_044	574.57550:1482 575.58017:0 576.58484:0	null	0	0	0	0	0	0	1253	1276	1109	1274	1222	1260	1151	1090	1085
620	0.664	576.571	Unknown	[M-H]-	null	0.91	False	null	null	null	null	null	null	999	False	False	False	Normalized unit: Intensity	False	False	620	0	0	null	null	null	null	null	null	null	1761.9	Plasma_017_neg_038	576.57068:2094 577.57535:0 578.58001:0	null	0	0	0	0	0	0	1856	2012	1844	1924	1962	1989	1709	1712	1743
621	0.585	576.866	Unknown	[M-H]-	null	0.91	False	null	null	null	null	null	null	999	False	False	False	Normalized unit: Intensity	False	False	621	0	0	null	null	null	null	null	null	null	1514.92	Plasma_002_neg_015	576.86603:2246 577.87070:234 578.87536:241	null	0	0	0	0	0	0	1525	1504	1137	1137	1369	1395	1266	1455	1211
622	8.183	578.319	Unknown	[M-H]-	null	0.6	False	null	null	null	null	null	null	999	False	False	False	Normalized unit: Intensity	False	False	622	0	0	null	null	null	null	null	null	null	259.85	Plasma_045_neg_076	578.31879:10462 579.32345:3081 580.32812:927	null	0	0	0	0	0	0	1117	800	1387	70	90	1154	1851	5483	2935
623	8.302	578.32	Unknown	[M-H]-	null	0.03	False	null	null	null	null	null	null	999	False	False	False	Normalized unit: Intensity	False	False	623	0	0	null	null	null	null	null	null	null	6.2	Plasma_045_neg_076	578.32013:1416 579.32480:492 580.32946:0	null	0	0	0	0	0	0	24	343	217	25	45	191	220	3038	327
624	7.987	578.32	Unknown	[M-H]-	null	0.71	False	null	null	null	null	null	null	999	False	False	False	Normalized unit: Intensity	False	False	624	0	0	null	null	null	null	null	null	null	346.42	Plasma_045_neg_076	578.32037:8464 579.32504:2547 580.32971:4955	null	0	0	0	0	0	0	1906	24	2160	216	143	652	2884	11287	4069
625	7.842	578.321	Unknown	[M-H]-	null	0.09	False	null	null	null	null	null	null	999	False	False	False	Normalized unit: Intensity	False	False	625	0	0	null	null	null	null	null	null	null	139.91	Plasma_045_neg_076	578.32098:1412 579.32565:347 580.33032:18555	null	0	0	0	0	0	0	0	18	15	0	0	0	53	36	453
626	0.664	578.568	Unknown	[M-H]-	null	0.91	False	null	null	null	null	null	null	999	False	False	False	Normalized unit: Intensity	False	False	626	0	0	null	null	null	null	null	null	null	1561.37	Plasma_017_neg_038	578.56787:1887 579.57254:0 580.57721:0	null	0	0	0	0	0	0	1636	1725	1596	1621	1680	1725	1528	1477	1528
627	0.628	578.88	Unknown	[M-H]-	null	0.91	False	null	null	null	null	null	null	999	False	False	False	Normalized unit: Intensity	False	False	627	0	0	null	null	null	null	null	null	null	1396	Plasma_036_neg_066	578.88000:2051 579.88467:173 580.88934:0	null	0	0	0	0	0	0	894	919	811	1089	1043	1067	986	893	1070
628	7.848	580.328	Unknown	[M-H]-	null	0.41	False	null	null	null	null	null	null	999	False	False	False	Normalized unit: Intensity	False	False	628	0	0	null	null	null	null	null	null	null	5055.05	Plasma_012_neg_027	580.32770:23847 581.33237:7222 582.33703:1691	null	0	0	0	0	0	0	12446	15674	6038	7968	2116	11535	7461	85651	17333
629	7.957	580.328	Unknown	[M-H]-	null	0.88	False	null	null	null	null	null	null	999	False	False	False	Normalized unit: Intensity	False	False	629	0	0	null	null	null	null	null	null	null	2955.11	Plasma_008_neg_022	580.32782:19676 581.33249:5942 582.33716:1505	null	0	0	0	0	0	0	7184	6224	3794	3247	1327	6464	6392	50839	14965
630	7.723	580.328	Unknown	[M-H]-	null	0.32	False	null	null	null	null	null	null	999	False	False	False	Normalized unit: Intensity	False	False	630	0	0	null	null	null	null	null	null	null	789.62	Plasma_012_neg_027	580.32831:5412 581.33298:1540 582.33764:347	null	0	0	0	0	0	0	710	1386	685	323	102	1816	706	9414	1241
631	8.082	580.335	Unknown	[M-H]-	null	0.88	False	null	null	null	null	null	null	999	False	False	False	Normalized unit: Intensity	False	False	631	0	0	null	null	null	null	null	null	null	4086.37	Plasma_045_neg_076	580.33502:25804 581.33969:8115 582.34436:2036	null	0	0	0	0	0	0	7905	6336	3786	2435	1160	6732	5795	35972	11958
632	7.478	580.351	no MS2: Phosphatidylcholine lyso 18:1	[M+CH3COO]-	null	0.03	False	2.38	580.362	C26H52NO7P	2-acyl-sn-glycero-3-phosphocholines	WZSWWJLIQCVBRG-ZCXUNETKSA-N	P([O-1])(=O)(OCC[N+1](C)(C)C)OCC(CO)OC(=O)CCC=CCCCCCCCCCCCCC	530	False	True	False	Normalized unit: Intensity; Annotation method: MSMS-Public_all-neg-VS19_1	False	False	632	0	0	0.96	-1	-1	-1	-1	-1	0.96	464	Plasma_040_neg_070	580.35870:956 581.36337:327 582.36804:0	null	0	0	0	0	0	0	0	59	0	0	0	0	0	3439	0
633	0.664	580.566	Unknown	[M-H]-	null	0.91	False	null	null	null	null	null	null	999	False	False	False	Normalized unit: Intensity	False	False	633	0	0	null	null	null	null	null	null	null	912.86	Plasma_017_neg_038	580.56567:1046 581.57034:0 582.57501:0	null	0	0	0	0	0	0	916	957	858	982	956	980	862	815	849
634	8.315	582.343	Unknown	[M-H]-	null	0.01	False	null	null	null	null	null	null	999	False	False	False	Normalized unit: Intensity	False	False	634	0	0	null	null	null	null	null	null	null	26.96	Plasma_008_neg_022	582.34259:2692 583.34726:804 584.35193:0	null	0	0	0	0	0	0	173	32	425	0	12	15	1549	7665	439
635	11.929	582.383	no MS2: Phosphatidylcholine lyso 18:0	[M+CH3COO]-	null	0.07	False	3.95	582.378	C26H54NO7P	2-acyl-sn-glycero-3-phosphocholines	IQGPMZRCLCCXAG-UHFFFAOYSA-N	P([O-1])(=O)(OCC[N+1](C)(C)C)OCC(CO)OC(=O)CCCCCCCCCCCCCCCCC	530	False	True	False	Normalized unit: Intensity; Annotation method: MSMS-Public_all-neg-VS19_1	False	False	635	0	0	0.91	-1	-1	-1	-1	-1	0.91	379.46	Plasma_008_neg_022	582.38281:2274 583.38748:815 584.39215:0	null	0	0	0	0	0	0	1161	619	0	16	42	1045	678	10904	1138
636	0.592	582.894	Unknown	[M-H]-	null	0.91	False	null	null	null	null	null	null	999	False	False	False	Normalized unit: Intensity	False	False	636	0	0	null	null	null	null	null	null	null	2445	Plasma_036_neg_066	582.89447:2879 583.89914:307 584.90381:0	null	0	0	0	0	0	0	3807	3701	3132	3292	3454	3487	3365	3416	3222
637	0.633	584.822	Unknown	[M-H]-	null	0.06	False	null	null	null	null	null	null	999	False	False	False	Normalized unit: Intensity	False	False	637	0	0	null	null	null	null	null	null	null	807.66	Plasma_020_neg_041	584.82220:899 585.82687:0 586.83154:0	null	0	0	0	0	0	0	560	557	533	567	556	524	594	521	623
638	9.176	586.327	Unknown	[M-H]-	null	0.06	False	null	null	null	null	null	null	999	False	False	False	Normalized unit: Intensity	False	False	638	0	0	null	null	null	null	null	null	null	948.25	Plasma_041_neg_072	586.32648:1210 587.33114:423 588.33581:0	null	0	0	0	0	0	0	208	60	0	0	0	28	254	166	22
639	9.727	588.332	Unknown	[M-H]-	null	0.91	False	null	null	null	null	null	null	999	False	False	False	Normalized unit: Intensity	False	False	639	0	0	null	null	null	null	null	null	null	7907.07	Plasma_001_neg_014	588.33173:15443 589.33639:4870 590.34106:1182	null	0	0	0	0	0	0	44885	34628	6883	7756	9562	21547	25757	29814	26577
640	9.569	588.339	Unknown	[M-H]-	null	0.74	False	null	null	null	null	null	null	999	False	False	False	Normalized unit: Intensity	False	False	640	0	0	null	null	null	null	null	null	null	1956.54	Plasma_032_neg_061	588.33868:3774 589.34335:1179 590.34802:0	null	0	0	0	0	0	0	7362	5692	1500	1705	3886	4504	5124	4856	6440
641	0.616	588.908	Unknown	[M-H]-	null	0.91	False	null	null	null	null	null	null	999	False	False	False	Normalized unit: Intensity	False	False	641	0	0	null	null	null	null	null	null	null	6427.21	Plasma_036_neg_066	588.90802:7700 589.91269:830 590.91736:223	null	0	0	0	0	0	0	11121	11017	9772	13452	13032	12331	12023	10842	12528
642	10.2	590.35	Unknown	[M-H]-	null	0.72	False	null	null	null	null	null	null	999	False	False	False	Normalized unit: Intensity	False	False	642	0	0	null	null	null	null	null	null	null	1873.94	Plasma_013_neg_028	590.35010:4094 591.35477:1487 592.35943:266	null	0	0	0	0	0	0	3997	2675	0	169	36	2626	1920	8585	3591
643	10.373	590.355	Unknown	[M-H]-	null	0.03	False	null	null	null	null	null	null	999	False	False	False	Normalized unit: Intensity	False	False	643	0	0	null	null	null	null	null	null	null	1012.06	Plasma_041_neg_072	590.35492:1034 591.35959:0 592.36425:0	null	0	0	0	0	0	0	98	247	0	0	0	0	93	497	93
644	10.122	590.356	Unknown	[M-H]-	null	0.44	False	null	null	null	null	null	null	999	False	False	False	Normalized unit: Intensity	False	False	644	0	0	null	null	null	null	null	null	null	1597.14	Plasma_041_neg_072	590.35590:3636 591.36056:1288 592.36523:0	null	0	0	0	0	0	0	1983	308	0	123	175	2663	644	1832	740
645	0.663	590.545	Unknown	[M-H]-	null	0.37	False	null	null	null	null	null	null	999	False	False	False	Normalized unit: Intensity	False	False	645	0	0	null	null	null	null	null	null	null	836.64	Plasma_008_neg_022	590.54492:1024 591.54959:0 592.55426:0	null	0	0	0	0	0	0	809	810	895	725	765	711	763	885	646
646	10.721	592.367	Unknown	[M-H]-	null	0.44	False	null	null	null	null	null	null	999	False	False	False	Normalized unit: Intensity	False	False	646	0	0	null	null	null	null	null	null	null	1393.18	Plasma_015_neg_030	592.36713:3024 593.37179:889 594.37646:0	null	0	0	0	0	0	0	445	263	0	0	18	1273	34	823	217
647	0.664	592.54	Unknown	[M-H]-	null	0.91	False	null	null	null	null	null	null	999	False	False	False	Normalized unit: Intensity	False	False	647	0	0	null	null	null	null	null	null	null	1126.08	Plasma_003_neg_016	592.54022:1480 593.54489:0 594.54956:0	null	0	0	0	0	0	0	1285	1209	1343	1128	1123	1219	1065	1279	1011
648	7.618	594.314	Unknown	[M-H]-	null	0.01	False	null	null	null	null	null	null	999	False	False	False	Normalized unit: Intensity	False	False	648	0	0	null	null	null	null	null	null	null	5.02	Plasma_045_neg_076	594.31378:879 595.31845:284 596.32312:0	null	0	0	0	0	0	0	255	0	303	0	163	135	210	166	15
649	9.007	594.351	Unknown	[M-H]-	null	0.01	False	null	null	null	null	null	null	999	False	False	False	Normalized unit: Intensity	False	False	649	0	0	null	null	null	null	null	null	null	4.81	QC_1-4_neg_080	594.35150:834 595.35617:235 596.36084:0	null	0	0	0	0	0	0	0	0	0	0	0	0	0	0	0
650	7.8	594.374	Unknown	[M-H]-	null	0.12	False	null	null	null	null	null	null	999	False	False	False	Normalized unit: Intensity	False	False	650	0	0	null	null	null	null	null	null	null	1575.39	Plasma_033_neg_062	594.37433:4610 595.37900:1634 596.38366:345	null	0	0	0	0	0	0	2012	1856	971	163	2651	845	1700	155	357
651	11.531	594.391	Unknown	[M-H]-	null	0.15	False	null	null	null	null	null	null	999	False	False	False	Normalized unit: Intensity	False	False	651	0	0	null	null	null	null	null	null	null	1057.46	Plasma_045_neg_076	594.39142:2823 595.39609:951 596.40075:0	null	0	0	0	0	0	0	78	26	0	0	19	253	117	5605	188
652	0.664	594.549	Unknown	[M-H]-	null	0.91	False	null	null	null	null	null	null	999	False	False	False	Normalized unit: Intensity	False	False	652	0	0	null	null	null	null	null	null	null	1036.59	Plasma_040_neg_070	594.54907:1317 595.55374:0 596.55841:0	null	0	0	0	0	0	0	1151	1136	1239	1049	1046	1098	1050	1151	981
653	0.628	594.849	Unknown	[M-H]-	null	0.91	False	null	null	null	null	null	null	999	False	False	False	Normalized unit: Intensity	False	False	653	0	0	null	null	null	null	null	null	null	1272.88	Plasma_009_neg_023	594.84918:1647 595.85385:0 596.85852:0	null	0	0	0	0	0	0	960	1036	1121	1021	1015	967	1088	954	1206
654	9.784	595.293	Unknown	[M-H]-	null	0.6	False	null	null	null	null	null	null	999	False	False	False	Normalized unit: Intensity	False	False	654	0	0	null	null	null	null	null	null	null	1212.12	Plasma_008_neg_022	595.29272:2027 596.29739:562 597.30206:0	null	0	0	0	0	0	0	3558	2963	19	721	924	2725	674	5545	1779
655	8.423	595.393	Unknown	[M-H]-	null	0.01	False	null	null	null	null	null	null	999	False	False	False	Normalized unit: Intensity	False	False	655	0	0	null	null	null	null	null	null	null	11.08	Plasma_033_neg_062	595.39331:965 596.39798:0 597.40265:0	null	0	0	0	0	0	0	116	0	0	0	1182	0	322	0	0
656	8.287	596.322	Unknown	[M-H]-	null	0.12	False	null	null	null	null	null	null	999	False	False	False	Normalized unit: Intensity	False	False	656	0	0	null	null	null	null	null	null	null	6.27	Plasma_007_neg_021	596.32172:1164 597.32638:403 598.33105:0	null	0	0	0	0	0	0	2204	0	1548	660	0	18	2705	313	1612
657	8.048	596.326	Unknown	[M-H]-	null	0.72	False	null	null	null	null	null	null	999	False	False	False	Normalized unit: Intensity	False	False	657	0	0	null	null	null	null	null	null	null	138.35	Plasma_026_neg_049	596.32617:7221 597.33084:2403 598.33551:541	null	0	0	0	0	0	0	11886	39	8318	5359	0	2183	11573	2653	10548
658	8.131	596.327	Unknown	[M-H]-	null	0.72	False	null	null	null	null	null	null	999	False	False	False	Normalized unit: Intensity	False	False	658	0	0	null	null	null	null	null	null	null	119.82	Plasma_026_neg_049	596.32678:6164 597.33145:1947 598.33612:416	null	0	0	0	0	0	0	11777	39	7759	5148	0	2336	11850	3248	10178
659	7.909	596.328	Unknown	[M-H]-	null	0.04	False	null	null	null	null	null	null	999	False	False	False	Normalized unit: Intensity	False	False	659	0	0	null	null	null	null	null	null	null	4.47	Plasma_026_neg_049	596.32782:1031 597.33249:0 598.33716:0	null	0	0	0	0	0	0	90	0	98	19	0	35	690	22	1414
660	7.086	596.332	Unknown	[M-H]-	null	0.6	False	null	null	null	null	null	null	999	False	False	False	Normalized unit: Intensity	False	False	660	0	0	null	null	null	null	null	null	null	39.16	Plasma_045_neg_076	596.33191:5875 597.33658:1923 598.34124:444	null	0	0	0	0	0	0	75	18	324	234	19	351	190	8226	3757
661	6.963	596.332	Unknown	[M-H]-	null	0.07	False	null	null	null	null	null	null	999	False	False	False	Normalized unit: Intensity	False	False	661	0	0	null	null	null	null	null	null	null	6.5	Plasma_045_neg_076	596.33221:1583 597.33688:540 598.34155:0	null	0	0	0	0	0	0	26	0	126	0	0	37	133	191	20
662	10.751	597.31	no MS2: Phosphatidylinositol lyso 18:1	[M-H]-	null	0.41	False	2.14	597.305	C27H51O12P	2-acyl-sn-glycerol-3-phosphoinositols	OVHGUPNHWUHPOM-DBFVMBBUSA-N	O(P(O)(=O)OCC(CO)OC(=O)CCC=CCCCCCCCCCCCCC)C(C1O)C(C(C(C1O)O)O)O	530	False	True	False	Normalized unit: Intensity; Annotation method: MSMS-Public_all-neg-VS19_1	False	False	662	0	0	1	-1	-1	-1	-1	-1	1	903.79	QC_3-1_neg_011	597.30560:1263 598.31027:409 599.31494:0	null	0	0	0	0	0	0	2352	467	17	38	107	1959	2126	13292	608
663	0.595	598.86	Unknown	[M-H]-	null	0.09	False	null	null	null	null	null	null	999	False	False	False	Normalized unit: Intensity	False	False	663	0	0	null	null	null	null	null	null	null	852.38	Plasma_014_neg_029	598.85992:967 599.86459:0 600.86926:0	null	0	0	0	0	0	0	1279	1194	1173	1052	1049	1138	1129	1331	960
664	12.41	603.46	Unknown	[M-H]-	null	0.03	False	null	null	null	null	null	null	999	False	False	False	Normalized unit: Intensity	False	False	664	0	0	null	null	null	null	null	null	null	1341.84	Plasma_017_neg_038	603.45972:1641 604.46438:528 605.46905:0	null	0	0	0	0	0	0	0	0	0	0	0	0	0	37	0
665	7.987	604.329	Unknown	[M-H]-	null	0.51	False	null	null	null	null	null	null	999	False	False	False	Normalized unit: Intensity	False	False	665	0	0	null	null	null	null	null	null	null	828.52	Plasma_008_neg_022	604.32867:2334 605.33334:635 606.33801:0	null	0	0	0	0	0	0	2503	2806	1182	278	37	1448	697	5519	2262
666	8.406	604.329	Unknown	[M-H]-	null	0.57	False	null	null	null	null	null	null	999	False	False	False	Normalized unit: Intensity	False	False	666	0	0	null	null	null	null	null	null	null	892.33	Plasma_008_neg_022	604.32880:2414 605.33346:872 606.33813:1055	null	0	0	0	0	0	0	876	2124	699	28	0	1232	807	6223	2485
667	8.199	604.334	Unknown	[M-H]-	null	0.25	False	null	null	null	null	null	null	999	False	False	False	Normalized unit: Intensity	False	False	667	0	0	null	null	null	null	null	null	null	926.82	Plasma_023_neg_045	604.33368:2011 605.33835:585 606.34301:0	null	0	0	0	0	0	0	2718	3013	371	214	18	2390	396	2899	2668
668	0.618	604.881	Unknown	[M-H]-	null	0.91	False	null	null	null	null	null	null	999	False	False	False	Normalized unit: Intensity	False	False	668	0	0	null	null	null	null	null	null	null	4268.23	Plasma_030_neg_053	604.88080:4702 605.88547:520 606.89013:590	null	0	0	0	0	0	0	7047	6870	7146	8012	7978	7832	7668	8049	7536
669	0.831	605.157	no MS2: 3-(1,3-benzodioxol-5-yl)-7-[(2S,3R,4S,5S,6R)-6-[[(2S,3R,4R)-3,4-dihydroxy-4-(hydroxymethyl)oxolan-2-yl]oxymethyl]-3,4,5-trihydroxyoxan-2-yl]oxy-6-methoxychromen-4-one	[M-H]-	null	0.29	False	2.733	605.151	C28H30O15	Isoflavonoid O-glycosides	BCWKMSLBLIKZQX-HMZWGCPASA-N	O=C1C=2C=C(OC)C(OC3OC(COC4OCC(O)(CO)C4O)C(O)C(O)C3O)=CC2OC=C1C=5C=CC=6OCOC6C5	530	False	True	False	Normalized unit: Intensity; Annotation method: MSMS-Public_all-neg-VS19_1	False	False	669	0	0	0.89	-1	-1	-1	-1	-1	0.89	195.46	Plasma_004_neg_017	605.15692:2024 606.16159:430 607.16626:0	null	0	0	0	0	0	0	6949	7547	2900	11605	8217	6435	5260	6564	6411
670	8.407	606.343	Unknown	[M-H]-	null	0.06	False	null	null	null	null	null	null	999	False	False	False	Normalized unit: Intensity	False	False	670	0	0	null	null	null	null	null	null	null	278.48	Plasma_013_neg_028	606.34277:1837 607.34744:523 608.35211:0	null	0	0	0	0	0	0	18	23	0	0	0	22	0	2956	328
671	8.249	606.344	Unknown	[M-H]-	null	0.06	False	null	null	null	null	null	null	999	False	False	False	Normalized unit: Intensity	False	False	671	0	0	null	null	null	null	null	null	null	577.41	Plasma_013_neg_028	606.34430:1917 607.34897:477 608.35363:0	null	0	0	0	0	0	0	17	13	0	0	0	20	0	2948	64
672	10.092	608.32	no MS2: 6-(1H-indol-3-ylmethyl)-9-methyl-3,15-di(propan-2-yl)-1,4,7,10,13,16-hexazabicyclo[16.3.0]henicosane-2,5,8,11,14,17-hexone	[M-H]-	null	0.06	False	4.323	608.32	C31H43N7O6	Oligopeptides	RXOMDRQVYULRRU-UHFFFAOYSA-N	O=C1N2CCCC2C(O)=NC(C(O)=NCC(O)=NC(C(O)=NC(C(O)=NC1C(C)C)CC3=CNC=4C=CC=CC43)C)C(C)C	530	False	True	False	Normalized unit: Intensity; Annotation method: MSMS-Public_all-neg-VS19_1	False	False	672	0	0	1	-1	-1	-1	-1	-1	1	913.63	Plasma_005_neg_018	608.32001:972 609.32468:256 610.32934:0	null	0	0	0	0	0	0	475	692	2980	1458	3877	715	673	149	458
673	7.8	608.353	Unknown	[M-H]-	null	0.01	False	null	null	null	null	null	null	999	False	False	False	Normalized unit: Intensity	False	False	673	0	0	null	null	null	null	null	null	null	1898.56	Plasma_033_neg_062	608.35303:1944 609.35770:738 610.36236:0	null	0	0	0	0	0	0	0	0	0	0	262	0	0	0	0
674	8.642	608.367	no MS2: NCGC00384824-01!methyl 3-hydroxy-2-[[3-hydroxy-2-[[2-[(3-hydroxy-2,4-dimethyltetradecanoyl)amino]-3-methylbutanoyl]amino]butanoyl]amino]propanoate	[M+Cl]-	null	0.01	False	-1	608.367	C29H55N3O8	Peptides	AKMKWHBDPUOPSK-UHFFFAOYSA-N	CCCCCCCCCCC(C)C(O)C(C)C(=O)NC(C(C)C)C(=O)NC(C(C)O)C(=O)NC(CO)C(=O)OC	530	False	True	False	Normalized unit: Intensity; Annotation method: MSMS-Public_all-neg-VS19_1	False	False	674	0	0	1	-1	-1	-1	-1	-1	1	1175	Plasma_045_neg_076	608.36688:1338 609.37155:400 610.37622:0	null	0	0	0	0	0	0	0	0	0	0	0	0	0	33	0
675	10.085	612.27	Unknown	[M-H]-	null	0.1	False	null	null	null	null	null	null	999	False	False	False	Normalized unit: Intensity	False	False	675	0	0	null	null	null	null	null	null	null	917.98	Plasma_036_neg_066	612.27032:1039 613.27499:406 614.27966:0	null	0	0	0	0	0	0	1117	915	766	1497	2784	1395	1419	1813	503
676	6.047	614.342	no MS2: Hexosyl LPE 16:0	[M-H]-	null	0.01	False	9.71	614.331	C27H54NO12P	Monosaccharide phosphates	UISOORRILGPHLE-OEYVFKEPSA-N	[H][C@@](O)(COC(=O)CCCCCCCCCCCCCCC)COP(O)(=O)OCCNC1OC(CO)C(O)C(O)C1O	530	False	True	False	Normalized unit: Intensity; Annotation method: MSMS-Public_all-neg-VS19_1	False	False	676	0	0	0.67	-1	-1	-1	-1	-1	0.67	1152.13	Plasma_045_neg_076	614.34222:1182 615.34689:0 616.35156:0	null	0	0	0	0	0	0	0	0	0	0	0	0	27	20	0
677	5.84	614.343	no MS2: Hexosyl LPE 16:0	[M-H]-	null	0.82	False	9.71	614.331	C27H54NO12P	Monosaccharide phosphates	UISOORRILGPHLE-OEYVFKEPSA-N	[H][C@@](O)(COC(=O)CCCCCCCCCCCCCCC)COP(O)(=O)OCCNC1OC(CO)C(O)C(O)C1O	530	False	True	False	Normalized unit: Intensity; Annotation method: MSMS-Public_all-neg-VS19_1	False	False	677	0	0	1	-1	-1	-1	-1	-1	1	2947.45	QC_2-1_neg_010	614.33118:2992 615.33584:887 616.34051:278	null	0	0	0	0	0	0	7051	3410	6910	88	337	4338	9314	32420	9996
678	5.716	614.343	no MS2: Hexosyl LPE 16:0	[M-H]-	null	0.03	False	9.71	614.331	C27H54NO12P	Monosaccharide phosphates	UISOORRILGPHLE-OEYVFKEPSA-N	[H][C@@](O)(COC(=O)CCCCCCCCCCCCCCC)COP(O)(=O)OCCNC1OC(CO)C(O)C(O)C1O	530	False	True	False	Normalized unit: Intensity; Annotation method: MSMS-Public_all-neg-VS19_1	False	False	678	0	0	0.63	-1	-1	-1	-1	-1	0.63	1248.19	Plasma_044_neg_075	614.34302:1288 615.34769:381 616.35235:0	null	0	0	0	0	0	0	17	42	48	0	0	42	27	156	20
679	10.265	614.347	Unknown	[M-H]-	null	0.43	False	null	null	null	null	null	null	999	False	False	False	Normalized unit: Intensity	False	False	679	0	0	null	null	null	null	null	null	null	915.17	Plasma_001_neg_014	614.34729:2287 615.35196:730 616.35663:0	null	0	0	0	0	0	0	6446	5010	109	0	0	837	1496	2196	2151
680	9.988	614.348	Unknown	[M-H]-	null	0.04	False	null	null	null	null	null	null	999	False	False	False	Normalized unit: Intensity	False	False	680	0	0	null	null	null	null	null	null	null	690.95	Plasma_001_neg_014	614.34778:1172 615.35245:486 616.35711:0	null	0	0	0	0	0	0	3130	2352	0	0	0	318	468	2379	1104
681	10.563	616.363	Unknown	[M-H]-	null	0.34	False	null	null	null	null	null	null	999	False	False	False	Normalized unit: Intensity	False	False	681	0	0	null	null	null	null	null	null	null	980.38	Plasma_001_neg_014	616.36340:1655 617.36807:584 618.37274:0	null	0	0	0	0	0	0	4689	3795	0	0	14	1253	1147	2569	1416
682	0.577	616.842	Unknown	[M-H]-	null	0.13	False	null	null	null	null	null	null	999	False	False	False	Normalized unit: Intensity	False	False	682	0	0	null	null	null	null	null	null	null	822.69	Plasma_002_neg_015	616.84167:1070 617.84634:281 618.85101:0	null	0	0	0	0	0	0	549	562	494	333	382	466	438	491	422
683	9.847	619.3	no MS2: Phosphatidylinositol lyso 20:4	[M-H]-	null	0.24	False	1.67	619.289	C29H49O12P	2-acyl-sn-glycerol-3-phosphoinositols	GCTCZDZDLCVEBR-BMBRPNNFSA-N	C(C(OC(CO)COP(O)(=O)OC(C(O)1)C(O)C(O)C(O)C1O)=O)CC=CCC=CCC=CCC=CCCCCCC	530	False	True	False	Normalized unit: Intensity; Annotation method: MSMS-Public_all-neg-VS19_1	False	False	683	0	0	1	-1	-1	-1	-1	-1	1	1061.22	Plasma_002_neg_015	619.28912:1065 620.29379:323 621.29846:0	null	0	0	0	0	0	0	3901	2680	0	459	807	225	2296	2921	2560
684	0.619	620.848	Unknown	[M-H]-	null	0.9	False	null	null	null	null	null	null	999	False	False	False	Normalized unit: Intensity	False	False	684	0	0	null	null	null	null	null	null	null	1272.23	Plasma_008_neg_022	620.84839:1667 621.85306:0 622.85772:0	null	0	0	0	0	0	0	1974	1924	2308	2089	2105	2159	2094	2661	1904
685	0.583	622.858	Unknown	[M-H]-	null	0.09	False	null	null	null	null	null	null	999	False	False	False	Normalized unit: Intensity	False	False	685	0	0	null	null	null	null	null	null	null	822.85	Plasma_002_neg_015	622.85840:1143 623.86307:304 624.86773:0	null	0	0	0	0	0	0	467	603	560	365	344	458	353	380	394
686	6.624	624.34	Unknown	[M-H]-	null	0.04	False	null	null	null	null	null	null	999	False	False	False	Normalized unit: Intensity	False	False	686	0	0	null	null	null	null	null	null	null	2230.19	Plasma_005_neg_018	624.34039:2497 625.34506:991 626.34973:0	null	0	0	0	0	0	0	957	216	669	176	5970	364	68	0	392
687	7.149	624.347	Unknown	[M-H]-	null	0.03	False	null	null	null	null	null	null	999	False	False	False	Normalized unit: Intensity	False	False	687	0	0	null	null	null	null	null	null	null	2549.72	Plasma_033_neg_062	624.34747:2775 625.35214:922 626.35681:235	null	0	0	0	0	0	0	487	337	0	0	1295	0	448	0	0
688	7.43	627.384	Unknown	[M-H]-	null	0.01	False	null	null	null	null	null	null	999	False	False	False	Normalized unit: Intensity	False	False	688	0	0	null	null	null	null	null	null	null	875.31	Plasma_033_neg_062	627.38348:931 628.38815:270 629.39282:0	null	0	0	0	0	0	0	121	0	0	0	678	20	0	0	0
689	0.587	628.88	Unknown	[M-H]-	null	0.03	False	null	null	null	null	null	null	999	False	False	False	Normalized unit: Intensity	False	False	689	0	0	null	null	null	null	null	null	null	823.38	Plasma_017_neg_038	628.87970:1026 629.88437:0 630.88904:0	null	0	0	0	0	0	0	429	517	583	397	344	429	376	328	451
690	9.694	632.322	Unknown	[M-H]-	null	0.15	False	null	null	null	null	null	null	999	False	False	False	Normalized unit: Intensity	False	False	690	0	0	null	null	null	null	null	null	null	970.71	Plasma_020_neg_041	632.32251:1029 633.32718:328 634.33185:0	null	0	0	0	0	0	0	1004	1509	910	1709	1486	1726	1049	1669	2531
691	0.577	632.828	Unknown	[M-H]-	null	0.32	False	null	null	null	null	null	null	999	False	False	False	Normalized unit: Intensity	False	False	691	0	0	null	null	null	null	null	null	null	920.44	Plasma_025_neg_047	632.82770:1326 633.83237:0 634.83703:0	null	0	0	0	0	0	0	708	619	326	349	557	599	554	660	443
692	10.411	634.335	Unknown	[M-H]-	null	0.19	False	null	null	null	null	null	null	999	False	False	False	Normalized unit: Intensity	False	False	692	0	0	null	null	null	null	null	null	null	898.27	QC_2-1_neg_010	634.33459:1028 635.33926:304 636.34393:0	null	0	0	0	0	0	0	1561	2593	682	1029	657	1531	1311	1013	1526
693	0.663	634.529	Unknown	[M-H]-	null	0.12	False	null	null	null	null	null	null	999	False	False	False	Normalized unit: Intensity	False	False	693	0	0	null	null	null	null	null	null	null	816.44	Plasma_017_neg_038	634.52930:966 635.53396:285 636.53863:0	null	0	0	0	0	0	0	582	682	583	698	627	705	591	585	672
694	11.352	635.45	Unknown	[M-H]-	null	0.35	False	null	null	null	null	null	null	999	False	False	False	Normalized unit: Intensity	False	False	694	0	0	null	null	null	null	null	null	null	1252.55	Plasma_017_neg_038	635.44983:2737 636.45450:1031 637.45916:0	null	0	0	0	0	0	0	0	0	0	0	0	0	0	20	0
695	0.803	636.087	Unknown	[M-H]-	null	0.28	False	null	null	null	null	null	null	999	False	False	False	Normalized unit: Intensity	False	False	695	0	0	null	null	null	null	null	null	null	1627.12	Plasma_006_neg_020	636.08661:2170 637.09128:942 638.09594:0	null	0	0	0	0	0	0	1376	5068	10053	3109	5935	3172	2412	6155	4608
696	11.281	636.364	Unknown	[M-H]-	null	0.07	False	null	null	null	null	null	null	999	False	False	False	Normalized unit: Intensity	False	False	696	0	0	null	null	null	null	null	null	null	990.64	Plasma_039_neg_069	636.36420:1163 637.36886:312 638.37353:0	null	0	0	0	0	0	0	0	8	38	68	56	194	418	324	414
697	0.663	636.527	Unknown	[M-H]-	null	0.09	False	null	null	null	null	null	null	999	False	False	False	Normalized unit: Intensity	False	False	697	0	0	null	null	null	null	null	null	null	819.19	Plasma_017_neg_038	636.52649:894 637.53116:0 638.53582:0	null	0	0	0	0	0	0	634	661	615	628	649	659	680	593	568
698	10.411	638.287	Unknown	[M-H]-	null	0.26	False	null	null	null	null	null	null	999	False	False	False	Normalized unit: Intensity	False	False	698	0	0	null	null	null	null	null	null	null	899.52	QC_2-3_neg_056	638.28699:1025 639.29166:322 640.29632:0	null	0	0	0	0	0	0	2383	742	86	153	22	1000	1041	1614	2207
699	0.582	638.835	Unknown	[M-H]-	null	0.5	False	null	null	null	null	null	null	999	False	False	False	Normalized unit: Intensity	False	False	699	0	0	null	null	null	null	null	null	null	953.68	Plasma_001_neg_014	638.83502:1285 639.83969:0 640.84436:0	null	0	0	0	0	0	0	770	689	469	531	620	607	590	686	499
700	11.284	640.294	Unknown	[M-H]-	null	0.21	False	null	null	null	null	null	null	999	False	False	False	Normalized unit: Intensity	False	False	700	0	0	null	null	null	null	null	null	null	1296.35	QC_3-1_neg_011	640.29401:1757 641.29867:576 642.30334:217	null	0	0	0	0	0	0	1684	6068	1807	3099	1607	2790	3007	624	869
701	12.695	642.403	Unknown	[M-H]-	null	0.01	False	null	null	null	null	null	null	999	False	False	False	Normalized unit: Intensity	False	False	701	0	0	null	null	null	null	null	null	null	2031.13	Plasma_008_neg_022	642.40332:2185 643.40799:1064 644.41266:312	null	0	0	0	0	0	0	666	90	0	0	0	121	522	4216	419
702	0.587	644.859	Unknown	[M-H]-	null	0.9	False	null	null	null	null	null	null	999	False	False	False	Normalized unit: Intensity	False	False	702	0	0	null	null	null	null	null	null	null	1171.85	Plasma_016_neg_037	644.85852:1634 645.86319:0 646.86786:0	null	0	0	0	0	0	0	1135	1078	901	921	960	1068	1014	1086	909
703	0.795	645.094	Unknown	[M-H]-	null	0.01	False	null	null	null	null	null	null	999	False	False	False	Normalized unit: Intensity	False	False	703	0	0	null	null	null	null	null	null	null	53	Plasma_020_neg_041	645.09430:2028 646.09897:557 647.10363:0	null	0	0	0	0	0	0	331	518	687	86	351	630	460	392	487
704	0.628	646.866	Unknown	[M-H]-	null	0.78	False	null	null	null	null	null	null	999	False	False	False	Normalized unit: Intensity	False	False	704	0	0	null	null	null	null	null	null	null	912.11	Plasma_036_neg_066	646.86609:1304 647.87076:0 648.87542:511	null	0	0	0	0	0	0	557	561	381	629	609	647	608	392	603
705	0.795	647.092	Unknown	[M-H]-	null	0.01	False	null	null	null	null	null	null	999	False	False	False	Normalized unit: Intensity	False	False	705	0	0	null	null	null	null	null	null	null	31.77	Plasma_020_neg_041	647.09222:1286 648.09689:487 649.10156:890	null	0	0	0	0	0	0	21	397	463	0	41	27	70	185	28
706	0.797	649.089	Unknown	[M-H]-	null	0.01	False	null	null	null	null	null	null	999	False	False	False	Normalized unit: Intensity	False	False	706	0	0	null	null	null	null	null	null	null	25.81	Plasma_020_neg_041	649.08917:890 650.09384:282 651.09851:0	null	0	0	0	0	0	0	21	71	20	0	0	0	0	0	0
707	0.593	650.88	Unknown	[M-H]-	null	0.91	False	null	null	null	null	null	null	999	False	False	False	Normalized unit: Intensity	False	False	707	0	0	null	null	null	null	null	null	null	1848.39	Plasma_036_neg_066	650.87982:2183 651.88449:326 652.88916:0	null	0	0	0	0	0	0	2696	2712	2353	2420	2580	2559	2463	2484	2459
708	4.033	652.03	no MS2: FT-sulfoxide; C16H18F15NO5S2	[M-H]-	null	0.01	False	-1	652.031	C16H18F15NO5S2	Organosulfonic acids	FULPJPAORUXWHR-UHFFFAOYSA-N	O=C(NC(C)(C)CS(=O)(=O)O)CCS(=O)CCC(F)(F)C(F)(F)C(F)(F)C(F)(F)C(F)(F)C(F)(F)C(F)(F)F	530	False	True	False	Normalized unit: Intensity; Annotation method: MSMS-Public_all-neg-VS19_1	False	False	708	0	0	0.99	-1	-1	-1	-1	-1	0.99	814.56	QC_3-1_neg_011	652.02991:849 653.03457:372 654.03924:0	null	0	0	0	0	0	0	1713	1601	1618	1628	813	1520	892	1294	1511
709	0.615	656.897	no MS2: PFSA-pentafluorosulfide; C9HF23O3S2	[M-H]-	null	0.91	False	-1	656.893	C9HF23O3S2	Organosulfonic acids	GQDNCVBSGIWYLZ-UHFFFAOYSA-N	O=S(=O)(O)C(F)(F)C(F)(F)C(F)(F)C(F)(F)C(F)(F)C(F)(F)C(F)(F)C(F)(F)C(F)(F)S(F)(F)(F)(F)F	530	False	True	False	Normalized unit: Intensity; Annotation method: MSMS-Public_all-neg-VS19_1	False	False	709	0	0	1	-1	-1	-1	-1	-1	1	3938.35	Plasma_023_neg_045	656.89288:4065 657.89755:553 658.90222:0	null	0	0	0	0	0	0	6390	6543	5635	7974	7786	7231	7102	6194	7487
710	7.04	659.476	Unknown	[M-H]-	null	0.01	False	null	null	null	null	null	null	999	False	False	False	Normalized unit: Intensity	False	False	710	0	0	null	null	null	null	null	null	null	2109.31	Plasma_008_neg_022	659.47571:2339 660.48038:954 661.48504:0	null	0	0	0	0	0	0	0	0	0	0	0	0	0	5262	0
711	0.628	662.836	Unknown	[M-H]-	null	0.91	False	null	null	null	null	null	null	999	False	False	False	Normalized unit: Intensity	False	False	711	0	0	null	null	null	null	null	null	null	994.3	Plasma_009_neg_023	662.83630:1374 663.84097:0 664.84564:0	null	0	0	0	0	0	0	717	798	849	703	682	692	741	698	864
712	12.414	663.481	Unknown	[M-H]-	null	0.37	False	null	null	null	null	null	null	999	False	False	False	Normalized unit: Intensity	False	False	712	0	0	null	null	null	null	null	null	null	2557.9	Plasma_017_neg_038	663.48053:5553 664.48520:2151 665.48987:457	null	0	0	0	0	0	0	0	21	0	0	0	0	0	1568	0
713	11.118	664.433	Unknown	[M-H]-	null	0.62	False	null	null	null	null	null	null	999	False	False	False	Normalized unit: Intensity	False	False	713	0	0	null	null	null	null	null	null	null	2435.11	Plasma_044_neg_075	664.43329:7312 665.43796:2666 666.44262:607	null	0	0	0	0	0	0	284	139	25	0	0	59	5388	13170	2027
714	0.596	666.842	Unknown	[M-H]-	null	0.04	False	null	null	null	null	null	null	999	False	False	False	Normalized unit: Intensity	False	False	714	0	0	null	null	null	null	null	null	null	817.85	Plasma_001_neg_014	666.84161:949 667.84628:0 668.85095:0	null	0	0	0	0	0	0	1241	1115	1096	997	902	1062	1096	1270	896
715	5.543	668.336	Unknown	[M-H]-	null	0.01	False	null	null	null	null	null	null	999	False	False	False	Normalized unit: Intensity	False	False	715	0	0	null	null	null	null	null	null	null	900.38	Plasma_030_neg_053	668.33618:942 669.34085:361 670.34552:0	null	0	0	0	0	0	0	1473	440	1461	822	142	278	644	784	1164
716	0.617	672.867	Unknown	[M-H]-	null	0.91	False	null	null	null	null	null	null	999	False	False	False	Normalized unit: Intensity	False	False	716	0	0	null	null	null	null	null	null	null	3317.28	Plasma_021_neg_043	672.86682:3752 673.87149:501 674.87616:313	null	0	0	0	0	0	0	5279	5143	5283	6091	6047	5805	5820	5965	5703
717	0.561	678.812	Unknown	[M-H]-	null	0.65	False	null	null	null	null	null	null	999	False	False	False	Normalized unit: Intensity	False	False	717	0	0	null	null	null	null	null	null	null	980.31	Plasma_001_neg_014	678.81183:1330 679.81650:393 680.82116:0	null	0	0	0	0	0	0	2395	2222	1893	1449	1550	1201	1951	2060	1764
718	7.042	681.458	Unknown	[M-H]-	null	0.01	False	null	null	null	null	null	null	999	False	False	False	Normalized unit: Intensity	False	False	718	0	0	null	null	null	null	null	null	null	2616.5	Plasma_008_neg_022	681.45758:2639 682.46225:1042 683.46692:308	null	0	0	0	0	0	0	0	0	0	0	0	0	511	8213	334
719	0.788	687.009	Unknown	[M-H]-	null	0.35	False	null	null	null	null	null	null	999	False	False	False	Normalized unit: Intensity	False	False	719	0	0	null	null	null	null	null	null	null	376.59	Plasma_026_neg_049	687.00897:1628 688.01364:468 689.01831:0	null	0	0	0	0	0	0	3985	3995	3760	4365	5024	3831	5459	4586	4277
720	4.613	688.344	Unknown	[M-H]-	null	0.01	False	null	null	null	null	null	null	999	False	False	False	Normalized unit: Intensity	False	False	720	0	0	null	null	null	null	null	null	null	1084.88	Plasma_045_neg_076	688.34363:1167 689.34830:467 690.35296:0	null	0	0	0	0	0	0	0	0	0	0	0	90	0	0	0
721	0.618	688.836	Unknown	[M-H]-	null	0.91	False	null	null	null	null	null	null	999	False	False	False	Normalized unit: Intensity	False	False	721	0	0	null	null	null	null	null	null	null	1207.85	Plasma_008_neg_022	688.83588:1588 689.84054:0 690.84521:0	null	0	0	0	0	0	0	1911	1793	2076	2047	2013	2001	1923	2468	1851
722	0.789	689.005	Unknown	[M-H]-	null	0.91	False	null	null	null	null	null	null	999	False	False	False	Normalized unit: Intensity	False	False	722	0	0	null	null	null	null	null	null	null	6964.33	Plasma_026_neg_049	689.00519:10733 690.00986:3092 691.01452:978	null	0	0	0	0	0	0	15041	42445	37552	44542	40597	42918	43110	41336	40833
723	11.345	690.452	Unknown	[M-H]-	null	0.03	False	null	null	null	null	null	null	999	False	False	False	Normalized unit: Intensity	False	False	723	0	0	null	null	null	null	null	null	null	871	Plasma_044_neg_075	690.45160:893 691.45627:374 692.46093:0	null	0	0	0	0	0	0	0	0	0	0	0	0	0	0	0
724	12.242	692.466	Unknown	[M-H]-	null	0.59	False	null	null	null	null	null	null	999	False	False	False	Normalized unit: Intensity	False	False	724	0	0	null	null	null	null	null	null	null	2126.91	Plasma_044_neg_075	692.46631:6952 693.47098:2618 694.47564:670	null	0	0	0	0	0	0	27	42	0	0	0	115	3044	4827	170
725	12.241	693.471	no MS2: PG 30:0	[M-H]-	null	0.25	False	8.181	693.471	C36H71O10P	Phosphatidylglycerols	ZAXBYLHGBBMAAY-UHFFFAOYSA-N	CCCCCCCCCCCCCCCC(=O)OC(COC(=O)CCCCCCCCCCCCC)COP(O)(=O)OCC(O)CO	530	False	True	False	Normalized unit: Intensity; Annotation method: MSMS-Public_all-neg-VS19_1	False	False	725	0	0	0.95	-1	-1	-1	-1	-1	0.95	1242.79	QC_1-3_neg_055	693.46667:993 694.47134:0 695.47601:0	null	0	0	0	0	0	0	0	15	0	0	0	0	74	833	31
726	0.562	694.792	Unknown	[M-H]-	null	0.22	False	null	null	null	null	null	null	999	False	False	False	Normalized unit: Intensity	False	False	726	0	0	null	null	null	null	null	null	null	1122.69	Plasma_008_neg_022	694.79163:1456 695.79629:0 696.80096:0	null	0	0	0	0	0	0	2851	2193	1314	1653	2109	2276	2248	2845	966
727	0.79	698.006	Unknown	[M-H]-	null	0.19	False	null	null	null	null	null	null	999	False	False	False	Normalized unit: Intensity	False	False	727	0	0	null	null	null	null	null	null	null	1105.21	Plasma_020_neg_041	698.00592:2821 699.01059:777 700.01526:0	null	0	0	0	0	0	0	1410	917	1548	1230	595	486	1522	1729	722
728	0.788	700.005	Unknown	[M-H]-	null	0.03	False	null	null	null	null	null	null	999	False	False	False	Normalized unit: Intensity	False	False	728	0	0	null	null	null	null	null	null	null	1409.25	Plasma_020_neg_041	700.00519:1861 701.00986:668 702.01452:0	null	0	0	0	0	0	0	366	486	681	159	235	392	674	702	632
729	0.79	702.003	Unknown	[M-H]-	null	0.01	False	null	null	null	null	null	null	999	False	False	False	Normalized unit: Intensity	False	False	729	0	0	null	null	null	null	null	null	null	1205	Plasma_020_neg_041	702.00317:1295 703.00784:191 704.01251:0	null	0	0	0	0	0	0	94	131	68	50	47	24	104	88	169
730	0.777	710.99	Unknown	[M-H]-	null	0.16	False	null	null	null	null	null	null	999	False	False	False	Normalized unit: Intensity	False	False	730	0	0	null	null	null	null	null	null	null	1433.37	Plasma_027_neg_050	710.99030:1511 711.99496:443 712.99963:0	null	0	0	0	0	0	0	472	343	776	2401	1132	4969	505	644	1120
731	0.588	712.843	Unknown	[M-H]-	null	0.69	False	null	null	null	null	null	null	999	False	False	False	Normalized unit: Intensity	False	False	731	0	0	null	null	null	null	null	null	null	900.33	Plasma_012_neg_027	712.84277:1241 713.84744:0 714.85211:0	null	0	0	0	0	0	0	789	841	642	601	773	749	649	714	633
732	0.627	714.853	Unknown	[M-H]-	null	0.04	False	null	null	null	null	null	null	999	False	False	False	Normalized unit: Intensity	False	False	732	0	0	null	null	null	null	null	null	null	845.04	Plasma_016_neg_037	714.85272:1098 715.85739:0 716.86206:0	null	0	0	0	0	0	0	166	449	331	497	499	429	378	448	476
733	0.593	718.869	Unknown	[M-H]-	null	0.9	False	null	null	null	null	null	null	999	False	False	False	Normalized unit: Intensity	False	False	733	0	0	null	null	null	null	null	null	null	1462.6	Plasma_036_neg_066	718.86853:2010 719.87320:339 720.87787:0	null	0	0	0	0	0	0	1997	2098	1752	1876	1949	1983	1819	1711	1955
734	0.614	724.884	Unknown	[M-H]-	null	0.91	False	null	null	null	null	null	null	999	False	False	False	Normalized unit: Intensity	False	False	734	0	0	null	null	null	null	null	null	null	2969.31	Plasma_036_neg_066	724.88428:3866 725.88895:573 726.89361:0	null	0	0	0	0	0	0	4564	4672	3872	5807	5798	5327	5043	4411	5486
735	0.627	730.828	Unknown	[M-H]-	null	0.84	False	null	null	null	null	null	null	999	False	False	False	Normalized unit: Intensity	False	False	735	0	0	null	null	null	null	null	null	null	851.91	Plasma_030_neg_053	730.82782:1118 731.83249:304 732.83716:0	null	0	0	0	0	0	0	583	648	666	610	623	541	658	593	605
736	0.618	732.872	Unknown	[M-H]-	null	0.03	False	null	null	null	null	null	null	999	False	False	False	Normalized unit: Intensity	False	False	736	0	0	null	null	null	null	null	null	null	811.13	Plasma_036_neg_066	732.87250:897 733.87717:0 734.88183:0	null	0	0	0	0	0	0	116	99	105	217	202	111	476	185	356
737	0.597	734.835	Unknown	[M-H]-	null	0.03	False	null	null	null	null	null	null	999	False	False	False	Normalized unit: Intensity	False	False	737	0	0	null	null	null	null	null	null	null	825.72	Plasma_008_neg_022	734.83459:812 735.83926:0 736.84393:0	null	0	0	0	0	0	0	1169	1094	1032	913	970	1051	1019	1183	797
738	0.616	740.859	Unknown	[M-H]-	null	0.91	False	null	null	null	null	null	null	999	False	False	False	Normalized unit: Intensity	False	False	738	0	0	null	null	null	null	null	null	null	3047.72	Plasma_030_neg_053	740.85889:3479 741.86355:598 742.86822:0	null	0	0	0	0	0	0	4615	4487	4474	5400	5357	5136	5072	5227	5029
739	3.97	755.44	no MS2: NCGC00169209-03![17-(2,6-dihydroxy-6-methyl-3-oxoheptan-2-yl)-3-hydroxy-4,4,9,13,14-pentamethyl-2-[3,4,5-trihydroxy-6-(hydroxymethyl)oxan-2-yl]oxy-2,3,7,8,10,11,12,15,16,17-decahydro-1H-cyclopenta[a]phenanthren-16-yl] acetate	[M+HCOO]-	null	0.84	False	-1	755.422	C38H62O12	Cucurbitacin glycosides	VJWYQRXPCZNDKS-UHFFFAOYSA-N	CC(=O)OC1CC2(C)C3CC=C4C(CC(OC5OC(CO)C(O)C(O)C5O)C(O)C4(C)C)C3(C)CCC2(C)C1C(C)(O)C(=O)CCC(C)(C)O	530	False	True	False	Normalized unit: Intensity; Annotation method: MSMS-Public_all-neg-VS19_1	False	False	739	0	0	0.83	-1	-1	-1	-1	-1	0.83	2151.8	QC_3-1_neg_011	755.43140:1697 756.43606:536 757.44073:227	null	0	0	0	0	0	0	2609	4462	5118	5098	716	7033	4282	3847	6879
740	0.617	756.822	Unknown	[M-H]-	null	0.91	False	null	null	null	null	null	null	999	False	False	False	Normalized unit: Intensity	False	False	740	0	0	null	null	null	null	null	null	null	1219.44	Plasma_008_neg_022	756.82172:1600 757.82638:217 758.83105:343	null	0	0	0	0	0	0	1755	1721	2085	2027	2028	2059	1925	2404	1917
741	0.616	766.867	Unknown	[M-H]-	null	0.54	False	null	null	null	null	null	null	999	False	False	False	Normalized unit: Intensity	False	False	741	0	0	null	null	null	null	null	null	null	858.62	Plasma_036_neg_066	766.86658:1004 767.87124:0 768.87591:0	null	0	0	0	0	0	0	62	93	224	1297	1207	1133	268	373	194
742	0.616	774.851	Unknown	[M-H]-	null	0.04	False	null	null	null	null	null	null	999	False	False	False	Normalized unit: Intensity	False	False	742	0	0	null	null	null	null	null	null	null	836.04	Plasma_030_neg_053	774.85120:890 775.85586:0 776.86053:0	null	0	0	0	0	0	0	320	348	193	918	988	987	856	997	883
743	9.557	783.584	no MS2: ursodeoxycholic acid	[2M-H]-	null	0.47	False	-1	783.578	C24H40O4	Dihydroxy bile acids, alcohols and derivatives	RUDATBOHQWOJDD-GDLHFPCISA-N	C[C@H](CCC(=O)O)[C@H]1CC[C@@H]2[C@@]1(CC[C@H]3[C@H]2[C@H](C[C@H]4[C@@]3(CC[C@H](C4)O)C)O)C	530	False	True	False	Normalized unit: Intensity; Annotation method: MSMS-Public_all-neg-VS19_1	False	False	743	0	0	1	-1	-1	-1	-1	-1	1	1703.04	QC_1-1_neg_009	783.57800:1099 784.58267:584 785.58734:0	null	0	0	0	0	0	0	4766	5966	15	435	6025	0	1878	2506	0
744	0.594	786.853	Unknown	[M-H]-	null	0.91	False	null	null	null	null	null	null	999	False	False	False	Normalized unit: Intensity	False	False	744	0	0	null	null	null	null	null	null	null	1118.48	Plasma_036_neg_066	786.85272:1424 787.85739:0 788.86206:0	null	0	0	0	0	0	0	1480	1554	1273	1333	1387	1528	1241	1227	1382
745	0.79	786.984	no MS2: FT-thioether; C17H7F27O2S	[M-H]-	null	0.78	False	-1	786.966	C17H7F27O2S	Halogenated fatty acids	LWPNFXDCJARAAR-UHFFFAOYSA-N	O=C(O)CSCCC(F)(F)C(F)(F)C(F)(F)C(F)(F)C(F)(F)C(F)(F)C(F)(F)C(F)(F)C(F)(F)C(F)(F)C(F)(F)C(F)(F)C(F)(F)F	530	False	True	False	Normalized unit: Intensity; Annotation method: MSMS-Public_all-neg-VS19_1	False	False	745	0	0	0.91	-1	-1	-1	-1	-1	0.91	1519.87	QC_2-1_neg_010	786.97333:1497 787.97800:438 788.98266:0	null	0	0	0	0	0	0	7187	2485	1626	6267	6140	4980	2994	8131	5694
746	10.225	790.567	no MS2: Phosphatidylcholine 16:0-16:1	[M+CH3COO]-	null	0.01	False	18.6	790.56	C40H78NO8P	Phosphatidylcholines	QAFBBWZLSNOQGW-OHYPFYFLSA-N	C(CCCCCCCCC)CCCCCC(OCC(OC(CCC=CCCCCCCCCCCC)=O)COP(OCC[N+1](C)(C)C)([O-1])=O)=O	530	False	True	False	Normalized unit: Intensity; Annotation method: MSMS-Public_all-neg-VS19_1	False	False	746	0	0	0.93	-1	-1	-1	-1	-1	0.93	950.81	Plasma_008_neg_022	790.56659:966 791.57126:489 792.57592:0	null	0	0	0	0	0	0	0	0	0	0	0	0	0	2755	0
747	0.613	792.875	Unknown	[M-H]-	null	0.91	False	null	null	null	null	null	null	999	False	False	False	Normalized unit: Intensity	False	False	747	0	0	null	null	null	null	null	null	null	2126.54	Plasma_036_neg_066	792.87543:3021 793.88009:330 794.88476:0	null	0	0	0	0	0	0	3067	3155	2570	4001	3994	3601	3436	2918	3724
748	0.616	800.851	Unknown	[M-H]-	null	0.66	False	null	null	null	null	null	null	999	False	False	False	Normalized unit: Intensity	False	False	748	0	0	null	null	null	null	null	null	null	878.09	Plasma_016_neg_037	800.85150:1002 801.85617:0 802.86084:0	null	0	0	0	0	0	0	969	966	711	1358	1297	1080	766	989	1128
749	9.557	805.567	no MS2: ursodeoxycholic acid	[2M-2H+Na]-	null	0.13	False	-1	805.56	C24H40O4	Dihydroxy bile acids, alcohols and derivatives	RUDATBOHQWOJDD-GDLHFPCISA-N	C[C@H](CCC(=O)O)[C@H]1CC[C@@H]2[C@@]1(CC[C@H]3[C@H]2[C@H](C[C@H]4[C@@]3(CC[C@H](C4)O)C)O)C	530	False	True	False	Normalized unit: Intensity; Annotation method: MSMS-Public_all-neg-VS19_1	False	False	749	0	0	1	-1	-1	-1	-1	-1	1	456.32	Plasma_001_neg_014	805.56140:1192 806.56607:636 807.57074:0	null	0	0	0	0	0	0	2370	2737	0	71	2887	0	1311	1557	0
750	0.662	808.412	Unknown	[M-H]-	null	0.32	False	null	null	null	null	null	null	999	False	False	False	Normalized unit: Intensity	False	False	750	0	0	null	null	null	null	null	null	null	924.17	Plasma_036_neg_066	808.41168:1163 809.41635:0 810.42102:0	null	0	0	0	0	0	0	45	206	140	95	309	231	426	407	719
751	0.562	808.777	Unknown	[M-H]-	null	0.22	False	null	null	null	null	null	null	999	False	False	False	Normalized unit: Intensity	False	False	751	0	0	null	null	null	null	null	null	null	870.82	Plasma_014_neg_029	808.77698:1041 809.78165:0 810.78631:0	null	0	0	0	0	0	0	1692	1675	1381	502	567	1386	1340	1455	601
752	0.616	808.847	Unknown	[M-H]-	null	0.91	False	null	null	null	null	null	null	999	False	False	False	Normalized unit: Intensity	False	False	752	0	0	null	null	null	null	null	null	null	2574.98	Plasma_030_neg_053	808.84668:2924 809.85135:601 810.85602:0	null	0	0	0	0	0	0	3633	3658	3505	4412	4353	4144	3996	4098	4032
753	0.663	810.402	Unknown	[M-H]-	null	0.91	False	null	null	null	null	null	null	999	False	False	False	Normalized unit: Intensity	False	False	753	0	0	null	null	null	null	null	null	null	1177.02	Plasma_016_neg_037	810.40192:1540 811.40658:0 812.41125:0	null	0	0	0	0	0	0	1067	1142	924	1161	1092	1138	989	837	1019
754	0.663	812.4	Unknown	[M-H]-	null	0.91	False	null	null	null	null	null	null	999	False	False	False	Normalized unit: Intensity	False	False	754	0	0	null	null	null	null	null	null	null	1062.1	Plasma_016_neg_037	812.39960:1460 813.40426:0 814.40893:0	null	0	0	0	0	0	0	943	1002	833	1039	963	1013	943	774	874
755	0.663	814.398	Unknown	[M-H]-	null	0.06	False	null	null	null	null	null	null	999	False	False	False	Normalized unit: Intensity	False	False	755	0	0	null	null	null	null	null	null	null	841.08	Plasma_016_neg_037	814.39752:1036 815.40219:0 816.40686:0	null	0	0	0	0	0	0	641	689	503	693	619	610	609	490	618
756	10.227	816.583	no MS2: 2-amino-3-({hydroxy[2-(icosanoyloxy)-3-[octadec-11-enoyloxy]propoxy]phosphoryl}oxy)propanoic acid	[M-H]-	null	0.01	False	-1	816.576	C44H84NO10P	Phosphatidylserines	OCCHNTXZVKCXFK-ZOMJBIPJSA-N	[H][C@](N)(COP(O)(=O)OC[C@@]([H])(COC(=O)CCCCCCCCC\C=C/CCCCCC)OC(=O)CCCCCCCCCCCCCCCCCCC)C(O)=O	530	False	True	False	Normalized unit: Intensity; Annotation method: MSMS-Public_all-neg-VS19_1	False	False	756	0	0	0.9	-1	-1	-1	-1	-1	0.9	1227.63	Plasma_008_neg_022	816.58350:1401 817.58816:583 818.59283:0	null	0	0	0	0	0	0	91	0	0	0	0	0	0	2516	0
757	4.207	823.876	Unknown	[M-2H]2-	null	0.07	False	null	null	null	null	null	null	999	False	False	False	Normalized unit: Intensity	False	False	757	0	0	null	null	null	null	null	null	null	1936.96	Plasma_013_neg_028	823.87592:4206 824.88058:1771 825.88525:271	null	0	0	0	0	0	0	221	68	42	0	0	39	0	78	773
758	0.662	824.381	Unknown	[M-H]-	null	0.74	False	null	null	null	null	null	null	999	False	False	False	Normalized unit: Intensity	False	False	758	0	0	null	null	null	null	null	null	null	902.88	QC_2-2_neg_033	824.38110:1011 825.38577:0 826.39044:0	null	0	0	0	0	0	0	887	897	777	780	900	840	794	723	700
759	0.617	824.816	Unknown	[M-H]-	null	0.88	False	null	null	null	null	null	null	999	False	False	False	Normalized unit: Intensity	False	False	759	0	0	null	null	null	null	null	null	null	1113.14	Plasma_014_neg_029	824.81592:1458 825.82059:0 826.82525:0	null	0	0	0	0	0	0	1544	1590	1811	1763	1862	1852	1709	2053	1659
760	0.662	826.384	Unknown	[M-H]-	null	0.91	False	null	null	null	null	null	null	999	False	False	False	Normalized unit: Intensity	False	False	760	0	0	null	null	null	null	null	null	null	1150.52	QC_1-3_neg_055	826.38373:1355 827.38840:0 828.39306:0	null	0	0	0	0	0	0	1076	1153	1056	1079	1138	1139	1008	1038	948
761	0.662	828.383	Unknown	[M-H]-	null	0.91	False	null	null	null	null	null	null	999	False	False	False	Normalized unit: Intensity	False	False	761	0	0	null	null	null	null	null	null	null	1050.36	Plasma_043_neg_074	828.38312:1237 829.38779:0 830.39245:0	null	0	0	0	0	0	0	986	1060	984	964	991	1093	961	917	843
762	0.662	830.369	Unknown	[M-H]-	null	0.04	False	null	null	null	null	null	null	999	False	False	False	Normalized unit: Intensity	False	False	762	0	0	null	null	null	null	null	null	null	817.65	Plasma_006_neg_020	830.36853:983 831.37320:0 832.37787:0	null	0	0	0	0	0	0	745	686	679	696	702	682	620	618	557
763	10.383	832.581	no MS2: PC(16:0/13-HODE)	[M+CH3COO]-	null	0.03	False	-1	832.571	C42H80NO9P	Phosphatidylcholines	YRNDWGBUIFZEKZ-CRWFHCLENA-N	CCCCCCCCCCCCCCCC(=O)OCC(COP([O-])(=O)OCC[N+](C)(C)C)OC(=O)CCCCCCC\C=C/C=C/C(O)CCCCC	530	False	True	False	Normalized unit: Intensity; Annotation method: MSMS-Public_all-neg-VS19_1	False	False	763	0	0	0.97	-1	-1	-1	-1	-1	0.97	12.36	Plasma_008_neg_022	832.57483:945 833.57950:382 834.58416:0	null	0	0	0	0	0	0	76	0	0	0	0	0	517	1985	696
764	0.615	834.857	Unknown	[M-H]-	null	0.24	False	null	null	null	null	null	null	999	False	False	False	Normalized unit: Intensity	False	False	764	0	0	null	null	null	null	null	null	null	874.95	Plasma_036_neg_066	834.85699:1106 835.86166:0 836.86633:0	null	0	0	0	0	0	0	32	19	0	35	46	77	62	48	125
765	10.397	840.583	no MS2: Phosphatidylcholine 18:2-18:2	[M+CH3COO]-	null	0.01	False	14.14	840.576	C44H80NO8P	Phosphatidylcholines	OLFQKGHJXVWQBX-CTKUXNRFSA-N	C(CCCCCC=CCC=CCCC(=O)OCC(COP(OCC[N+1](C)(C)C)([O-1])=O)OC(CCC=CCC=CCCCCCCCCCC)=O)CCCC	530	False	True	False	Normalized unit: Intensity; Annotation method: MSMS-Public_all-neg-VS19_1	False	False	765	0	0	0.91	-1	-1	-1	-1	-1	0.91	985.5	Plasma_008_neg_022	840.58337:983 841.58804:328 842.59271:0	null	0	0	0	0	0	0	44	0	0	0	0	0	0	1942	0
766	0.663	842.351	Unknown	[M-H]-	null	0.07	False	null	null	null	null	null	null	999	False	False	False	Normalized unit: Intensity	False	False	766	0	0	null	null	null	null	null	null	null	842.34	Plasma_003_neg_016	842.35150:902 843.35617:0 844.36084:0	null	0	0	0	0	0	0	658	694	740	577	616	708	598	693	466
767	0.617	842.841	Unknown	[M-H]-	null	0.59	False	null	null	null	null	null	null	999	False	False	False	Normalized unit: Intensity	False	False	767	0	0	null	null	null	null	null	null	null	864.67	Plasma_030_neg_053	842.84113:1131 843.84579:0 844.85046:0	null	0	0	0	0	0	0	27	60	125	1177	101	1103	1081	255	293
768	5.135	843.932	Unknown	[M-2H]2-	null	0.46	False	null	null	null	null	null	null	999	False	False	False	Normalized unit: Intensity	False	False	768	0	0	null	null	null	null	null	null	null	1105.62	Plasma_011_neg_026	843.93237:1797 844.93704:769 845.94171:0	null	0	0	0	0	0	0	1317	1845	2221	2224	212	3217	1587	1044	1858
769	4.001	848.065	Unknown	[M-H]-	null	0.91	False	null	null	null	null	null	null	999	False	False	False	Normalized unit: Intensity	False	False	769	0	0	null	null	null	null	null	null	null	952.62	QC_1-1_neg_009	848.06531:1064 849.06998:462 850.07464:0	null	0	0	0	0	0	0	2134	2028	2023	1893	1976	2092	1849	1445	1916
770	4.001	850.063	Unknown	[M-H]-	null	0.91	False	null	null	null	null	null	null	999	False	False	False	Normalized unit: Intensity	False	False	770	0	0	null	null	null	null	null	null	null	1256.11	QC_1-1_neg_009	850.06268:1539 851.06735:611 852.07202:0	null	0	0	0	0	0	0	2889	2678	2600	2620	2616	2720	2604	2010	2583
771	0.595	854.835	Unknown	[M-H]-	null	0.59	False	null	null	null	null	null	null	999	False	False	False	Normalized unit: Intensity	False	False	771	0	0	null	null	null	null	null	null	null	861.53	Plasma_016_neg_037	854.83459:1028 855.83926:0 856.84393:0	null	0	0	0	0	0	0	1021	1047	806	935	892	954	788	714	919
772	0.613	860.862	Unknown	[M-H]-	null	0.91	False	null	null	null	null	null	null	999	False	False	False	Normalized unit: Intensity	False	False	772	0	0	null	null	null	null	null	null	null	1423.45	Plasma_036_neg_066	860.86212:1903 861.86679:253 862.87146:0	null	0	0	0	0	0	0	1949	2040	1609	2630	2514	2297	2222	1819	2385
773	0.615	868.849	Unknown	[M-H]-	null	0.22	False	null	null	null	null	null	null	999	False	False	False	Normalized unit: Intensity	False	False	773	0	0	null	null	null	null	null	null	null	864.62	Plasma_036_neg_066	868.84857:972 869.85324:0 870.85791:0	null	0	0	0	0	0	0	61	0	49	67	266	149	318	367	221
774	9.552	872.608	Unknown	[M-H]-	null	0.01	False	null	null	null	null	null	null	999	False	False	False	Normalized unit: Intensity	False	False	774	0	0	null	null	null	null	null	null	null	956.5	Plasma_008_neg_022	872.60828:1119 873.61294:452 874.61761:0	null	0	0	0	0	0	0	275	20	0	0	0	0	72	1776	0
775	0.616	876.838	Unknown	[M-H]-	null	0.91	False	null	null	null	null	null	null	999	False	False	False	Normalized unit: Intensity	False	False	775	0	0	null	null	null	null	null	null	null	2017.85	Plasma_030_neg_053	876.83771:2330 877.84238:480 878.84704:0	null	0	0	0	0	0	0	2706	2637	2579	3340	3368	3174	3003	2992	3006
776	7.097	880.559	no MS2: PC(18:2/20-HETE)	[M+CH3COO]-	null	0.01	False	-1	880.571	C46H80NO9P	Phosphatidylcholines	LPWSXUXFFXPFOX-SNKIDJQPNA-N	CCCCC\C=C/C\C=C/CCCCCCCC(=O)OCC(COP([O-])(=O)OCC[N+](C)(C)C)OC(=O)CCC\C=C/C\C=C/C\C=C/C\C=C/CCCCCO	530	False	True	False	Normalized unit: Intensity; Annotation method: MSMS-Public_all-neg-VS19_1	False	False	776	0	0	0.8	-1	-1	-1	-1	-1	0.8	881.88	Plasma_008_neg_022	880.55933:947 881.56399:381 882.56866:0	null	0	0	0	0	0	0	0	0	0	0	0	0	0	2140	0
777	0.617	892.797	Unknown	[M-H]-	null	0.82	False	null	null	null	null	null	null	999	False	False	False	Normalized unit: Intensity	False	False	777	0	0	null	null	null	null	null	null	null	954.68	Plasma_008_neg_022	892.79688:1219 893.80154:0 894.80621:0	null	0	0	0	0	0	0	1262	1296	1437	1432	1558	1428	1432	1742	1317
778	8.371	897.633	no MS2: glycoursodeoxycholic acid	[2M-H]-	null	0.04	False	-1	897.621	C26H43NO5	Glycinated bile acids and derivatives	GHCZAUBVMUEKKP-WTFVBUONSA-N	C[C@H](CCC(=O)NCC(=O)O)[C@H]1CC[C@@H]2[C@@]1(CC[C@H]3[C@H]2[C@H](C[C@H]4[C@@]3(CC[C@H](C4)O)C)O)C	530	False	True	False	Normalized unit: Intensity; Annotation method: MSMS-Public_all-neg-VS19_1	False	False	778	0	0	0.99	-1	-1	-1	-1	-1	0.99	7858.63	Plasma_005_neg_018	897.62341:3228 898.62808:2433 899.63275:934	null	0	0	0	0	0	0	44	0	0	0	6033	0	139	0	0
779	8.357	897.795	Unknown	[M-H]-	null	0.01	False	null	null	null	null	null	null	999	False	False	False	Normalized unit: Intensity	False	False	779	0	0	null	null	null	null	null	null	null	893.5	Plasma_033_neg_062	897.79547:1363 898.80014:315 899.80481:0	null	0	0	0	0	0	0	0	0	0	0	0	0	0	0	0
780	0.616	902.845	Unknown	[M-H]-	null	0.24	False	null	null	null	null	null	null	999	False	False	False	Normalized unit: Intensity	False	False	780	0	0	null	null	null	null	null	null	null	852.93	Plasma_036_neg_066	902.84460:1029 903.84927:0 904.85394:0	null	0	0	0	0	0	0	0	0	28	0	46	0	60	60	56
781	9.538	910.632	Unknown	[M-H]-	null	0.19	False	null	null	null	null	null	null	999	False	False	False	Normalized unit: Intensity	False	False	781	0	0	null	null	null	null	null	null	null	1111.44	Plasma_033_neg_062	910.63202:1763 911.63669:986 912.64135:345	null	0	0	0	0	0	0	2451	75	0	0	86	0	88	2412	0
782	0.616	910.826	Unknown	[M-H]-	null	0.5	False	null	null	null	null	null	null	999	False	False	False	Normalized unit: Intensity	False	False	782	0	0	null	null	null	null	null	null	null	848.32	Plasma_030_neg_053	910.82629:992 911.83096:381 912.83563:0	null	0	0	0	0	0	0	334	538	169	1182	1153	1094	880	1035	352
783	8.37	919.615	no MS2: glycoursodeoxycholic acid	[2M-2H+Na]-	null	0.04	False	-1	919.603	C26H43NO5	Glycinated bile acids and derivatives	GHCZAUBVMUEKKP-WTFVBUONSA-N	C[C@H](CCC(=O)NCC(=O)O)[C@H]1CC[C@@H]2[C@@]1(CC[C@H]3[C@H]2[C@H](C[C@H]4[C@@]3(CC[C@H](C4)O)C)O)C	530	False	True	False	Normalized unit: Intensity; Annotation method: MSMS-Public_all-neg-VS19_1	False	False	783	0	0	1	-1	-1	-1	-1	-1	1	1655.38	Plasma_005_neg_018	919.60339:974 920.60806:776 921.61273:256	null	0	0	0	0	0	0	0	0	0	0	2060	0	0	0	0
784	0.614	928.845	Unknown	[M-H]-	null	0.31	False	null	null	null	null	null	null	999	False	False	False	Normalized unit: Intensity	False	False	784	0	0	null	null	null	null	null	null	null	989.05	Plasma_016_neg_037	928.84497:1495 929.84964:229 930.85431:0	null	0	0	0	0	0	0	395	1202	294	974	1650	1477	1392	523	1630
785	7.21	930.626	Unknown	[M-H]-	null	0.84	False	null	null	null	null	null	null	999	False	False	False	Normalized unit: Intensity	False	False	785	0	0	null	null	null	null	null	null	null	1235.97	Plasma_035_neg_064	930.62628:3854 931.63095:44860 932.63562:25609	null	0	0	0	0	0	0	2114	4091	1757	304	2030	2089	103	2154	399
786	7.21	931.619	Unknown	[M-H]-	null	0.91	False	null	null	null	null	null	null	999	False	False	False	Normalized unit: Intensity	False	False	786	0	0	null	null	null	null	null	null	null	45963.5	Plasma_001_neg_014	931.61877:52872 932.62344:29470 933.62811:9661	null	0	0	0	0	0	0	115195	110945	111276	102839	108325	103666	100858	93707	101463
787	7.22	931.777	Unknown	[M-H]-	null	0.31	False	null	null	null	null	null	null	999	False	False	False	Normalized unit: Intensity	False	False	787	0	0	null	null	null	null	null	null	null	1308.46	Plasma_027_neg_050	931.77710:1832 932.78177:1361 933.78644:0	null	0	0	0	0	0	0	1802	187	905	1284	259	1893	2199	2557	483
788	7.202	931.809	Unknown	[M-H]-	null	0.37	False	null	null	null	null	null	null	999	False	False	False	Normalized unit: Intensity	False	False	788	0	0	null	null	null	null	null	null	null	2081.95	Plasma_039_neg_069	931.80902:2329 932.81369:0 933.81836:582	null	0	0	0	0	0	0	160	705	355	943	767	616	268	253	652
789	9.55	934.633	Unknown	[M-H]-	null	0.01	False	null	null	null	null	null	null	999	False	False	False	Normalized unit: Intensity	False	False	789	0	0	null	null	null	null	null	null	null	1068.69	Plasma_033_neg_062	934.63263:1087 935.63730:661 936.64196:0	null	0	0	0	0	0	0	51	20	0	0	121	0	0	289	0
790	0.616	936.829	Unknown	[M-H]-	null	0.06	False	null	null	null	null	null	null	999	False	False	False	Normalized unit: Intensity	False	False	790	0	0	null	null	null	null	null	null	null	851.94	Plasma_017_neg_038	936.82941:909 937.83407:0 938.83874:0	null	0	0	0	0	0	0	350	670	203	1016	980	868	850	663	906
791	8.067	942.619	Unknown	[M-H]-	null	0.01	False	null	null	null	null	null	null	999	False	False	False	Normalized unit: Intensity	False	False	791	0	0	null	null	null	null	null	null	null	1074.56	Plasma_044_neg_075	942.61890:1029 943.62356:690 944.62823:0	null	0	0	0	0	0	0	0	0	0	0	0	0	0	759	0
792	0.615	944.826	Unknown	[M-H]-	null	0.29	False	null	null	null	null	null	null	999	False	False	False	Normalized unit: Intensity	False	False	792	0	0	null	null	null	null	null	null	null	1598.79	Plasma_030_neg_053	944.82562:1823 945.83029:469 946.83496:0	null	0	0	0	0	0	0	0	0	0	0	55	118	0	61	114
793	7.21	953.614	Unknown	[M-H]-	null	0.84	False	null	null	null	null	null	null	999	False	False	False	Normalized unit: Intensity	False	False	793	0	0	null	null	null	null	null	null	null	3123.6	Plasma_034_neg_063	953.61420:3426 954.61886:1814 955.62353:0	null	0	0	0	0	0	0	9762	0	9608	39	9691	5790	9213	8412	5000
794	7.211	954.62	Unknown	[M-H]-	null	0.85	False	null	null	null	null	null	null	999	False	False	False	Normalized unit: Intensity	False	False	793	1	0	null	null	null	null	null	null	null	1809.22	QC_1-4_neg_080	954.62030:1992 955.62497:963 956.62964:0	null	0	0	0	0	0	0	5549	3899	3423	5301	5351	5319	5190	4734	5147
795	0.617	960.79	Unknown	[M-H]-	null	0.53	False	null	null	null	null	null	null	999	False	False	False	Normalized unit: Intensity	False	False	795	0	0	null	null	null	null	null	null	null	862.41	Plasma_008_neg_022	960.78998:1045 961.79465:336 962.79931:0	null	0	0	0	0	0	0	1029	1077	1117	1175	1163	1283	1187	1419	1074
796	5.146	961.471	Unknown	[M-H]-	null	0.04	False	null	null	null	null	null	null	999	False	False	False	Normalized unit: Intensity	False	False	796	0	0	null	null	null	null	null	null	null	871.92	Plasma_019_neg_040	961.47119:947 962.47586:446 963.48053:0	null	0	0	0	0	0	0	156	165	869	1024	0	1326	430	332	555
797	0.618	970.825	Unknown	[M-H]-	null	0.01	False	null	null	null	null	null	null	999	False	False	False	Normalized unit: Intensity	False	False	797	0	0	null	null	null	null	null	null	null	816.19	Plasma_016_neg_037	970.82520:842 971.82986:0 972.83453:0	null	0	0	0	0	0	0	429	147	221	846	576	372	596	453	836
798	0.616	978.818	Unknown	[M-H]-	null	0.19	False	null	null	null	null	null	null	999	False	False	False	Normalized unit: Intensity	False	False	798	0	0	null	null	null	null	null	null	null	830.75	Plasma_030_neg_053	978.81763:929 979.82229:0 980.82696:0	null	0	0	0	0	0	0	0	0	25	50	228	230	534	135	90
799	7.212	984.538	Unknown	[M-H]-	null	0.01	False	null	null	null	null	null	null	999	False	False	False	Normalized unit: Intensity	False	False	799	0	0	null	null	null	null	null	null	null	802.75	Plasma_027_neg_050	984.53772:848 985.54239:776 986.54706:376	null	0	0	0	0	0	0	718	503	1119	940	677	379	780	985	1577
800	0.614	996.841	Unknown	[M-H]-	null	0.06	False	null	null	null	null	null	null	999	False	False	False	Normalized unit: Intensity	False	False	800	0	0	null	null	null	null	null	null	null	900.42	Plasma_036_neg_066	996.84100:1024 997.84567:0 998.85034:0	null	0	0	0	0	0	0	16	0	32	0	0	0	0	22	35
[truncated: 55 more columns]

## Sheet: Area_1_2025_02_12_reduced
																																			Class	1	1	1	1	1	1	1	1	1	1	1	1	1	1
																																			File type	Blank	Blank	Blank	Blank	Blank	Blank	Sample	Sample	Sample	Sample	Sample	Sample	Sample	Sample
																																			Injection order	1	2	3	4	5	6	7	8	9	10	11	12	13	14
																																			Batch ID	1	1	1	1	1	1	1	1	1	1	1	1	1	1
Alignment ID	Average Rt(min)	Average Mz		Metabolite name	Adduct type	Post curation result	Fill %	MS/MS assigned	Reference RT	Reference m/z	Formula	Ontology	INCHIKEY	SMILES	Annotation tag (VS1.0)	RT matched	m/z matched	MS/MS matched	Comment	Manually modified for quantification	Manually modified for annotation	Isotope tracking parent ID	Isotope tracking weight number	RT similarity	m/z similarity	Simple dot product	Weighted dot product	Reverse dot product	Matched peaks count	Matched peaks percentage	Total score	S/N average	Spectrum reference file name	MS1 isotopic spectrum	MS/MS spectrum	Blind_11_neg_054	Blind_16_neg_079	Blind_17_neg_084	Blind_4_neg_008	Blind_8_neg_031	Blind_9_neg_036	Plasma_001_neg_014	Plasma_002_neg_015	Plasma_003_neg_016	Plasma_004_neg_017	Plasma_005_neg_018	Plasma_006_neg_020	Plasma_007_neg_021	Plasma_008_neg_022
341	0.558	386.947	0.56/386.9466	Unknown	[M-H]-	null	0.01	False	null	null	null	null	null	null	999	False	False	False	Normalized unit: Intensity	False	False	341	0	0	null	null	null	null	null	null	null	29.05	Plasma_034_neg_063	386.94659:902 387.95126:356 388.95593:468	null	0	0	0	0	0	0	96	431	790	62	19	52	33	17
387	0.56	420.896	0.56/420.8955	no MS2: Benzbromarone	[M-H]-	null	0.81	False	1	420.908	C17H12Br2O3	Aryl-phenylketones	WHQCHUCQKNIQEC-UHFFFAOYSA-N	O=C(C1=CC(Br)=C(O)C(Br)=C1)C=2C=3C=CC=CC3OC2CC	530	False	True	False	Normalized unit: Intensity; Annotation method: MSMS-Public_all-neg-VS19_1	False	False	387	0	0	0.86	-1	-1	-1	-1	-1	0.86	1423.54	QC_2-3_neg_056	420.90250:1342 421.90716:0 422.91183:0	null	0	0	0	0	0	0	2460	4107	3998	2981	2971	3526	3460	3322
717	0.561	678.812	0.56/678.8118	Unknown	[M-H]-	null	0.65	False	null	null	null	null	null	null	999	False	False	False	Normalized unit: Intensity	False	False	717	0	0	null	null	null	null	null	null	null	980.31	Plasma_001_neg_014	678.81183:1330 679.81650:393 680.82116:0	null	0	0	0	0	0	0	2395	2222	1893	1449	1550	1201	1951	2060
375	0.561	404.921	0.56/404.9209	no MS2: Arthothelin	[M+HCOO]-	null	0.68	False	-1	404.934	C14H7Cl3O5	Xanthones	NTAXLEHKEDVPRK-UHFFFAOYSA-N	Cc1cc(c(c2c1c(=O)c1c(o2)c(c(c(c1O)Cl)O)Cl)Cl)O	530	False	True	False	Normalized unit: Intensity; Annotation method: MSMS-Public_all-neg-VS19_1	False	False	375	0	0	0.77	-1	-1	-1	-1	-1	0.77	905.21	QC_3-4_neg_082	404.92679:1179 405.93146:0 406.93612:0	null	0	0	0	0	0	0	2291	3072	2061	1223	1539	2234	2166	1175
372	0.561	402.922	0.56/402.9224	Unknown	[M-H]-	null	0.91	False	null	null	null	null	null	null	999	False	False	False	Normalized unit: Intensity	False	False	372	0	0	null	null	null	null	null	null	null	2155.71	Plasma_017_neg_038	402.92239:5191 403.92706:1738 404.93173:0	null	0	0	0	0	0	0	6560	8590	12099	5166	4546	6320	5995	5063
386	0.561	418.896	0.56/418.8960	Unknown	[M-H]-	null	0.91	False	null	null	null	null	null	null	999	False	False	False	Normalized unit: Intensity	False	False	386	0	0	null	null	null	null	null	null	null	6314.25	Plasma_002_neg_015	418.89600:8340 419.90066:1680 420.90533:0	null	0	0	0	0	0	0	19446	20784	20636	7378	15400	18053	17540	17235
400	0.561	434.879	0.56/434.8790	Unknown	[M-H]-	null	0.91	False	null	null	null	null	null	null	999	False	False	False	Normalized unit: Intensity	False	False	400	0	0	null	null	null	null	null	null	null	5572.91	Plasma_025_neg_047	434.87900:8623 435.88367:707 436.88833:402	null	0	0	0	0	0	0	21152	18322	13403	15997	18839	18812	18971	21277
557	0.561	532.881	0.56/532.8812	Unknown	[M-H]-	null	0.84	False	null	null	null	null	null	null	999	False	False	False	Normalized unit: Intensity	False	False	557	0	0	null	null	null	null	null	null	null	1320.3	Plasma_017_neg_038	532.88123:1978 533.88589:707 534.89056:683	null	0	0	0	0	0	0	2670	3416	4298	1943	1732	1162	2413	2122
574	0.561	548.857	0.56/548.8575	Unknown	[M-H]-	null	0.91	False	null	null	null	null	null	null	999	False	False	False	Normalized unit: Intensity	False	False	574	0	0	null	null	null	null	null	null	null	2932.26	Plasma_014_neg_029	548.85748:3712 549.86215:767 550.86682:0	null	0	0	0	0	0	0	7988	8085	7353	5540	5881	6914	6869	7016
597	0.561	564.837	0.56/564.8375	Unknown	[M-H]-	null	0.91	False	null	null	null	null	null	null	999	False	False	False	Normalized unit: Intensity	False	False	597	0	0	null	null	null	null	null	null	null	2559.05	Plasma_025_neg_047	564.83752:3813 565.84219:424 566.84686:197	null	0	0	0	0	0	0	8539	7040	4683	5771	7075	7252	7249	8520
751	0.562	808.777	0.56/808.7770	Unknown	[M-H]-	null	0.22	False	null	null	null	null	null	null	999	False	False	False	Normalized unit: Intensity	False	False	751	0	0	null	null	null	null	null	null	null	870.82	Plasma_014_neg_029	808.77698:1041 809.78165:0 810.78631:0	null	0	0	0	0	0	0	1692	1675	1381	502	567	1386	1340	1455
726	0.562	694.792	0.56/694.7916	Unknown	[M-H]-	null	0.22	False	null	null	null	null	null	null	999	False	False	False	Normalized unit: Intensity	False	False	726	0	0	null	null	null	null	null	null	null	1122.69	Plasma_008_neg_022	694.79163:1456 695.79629:0 696.80096:0	null	0	0	0	0	0	0	2851	2193	1314	1653	2109	2276	2248	2845
198	0.562	304.919	0.56/304.9192	Unknown	[M-H]-	null	0.87	False	null	null	null	null	null	null	999	False	False	False	Normalized unit: Intensity	False	False	198	0	0	null	null	null	null	null	null	null	6631.96	Plasma_025_neg_047	304.91919:8843 305.92386:427 306.92852:336	null	144	198	164	519	289	124	25282	22564	7274	19843	22206	22831	22600	24340
170	0.563	288.938	0.56/288.9379	Unknown	[M-H]-	null	0.84	False	null	null	null	null	null	null	999	False	False	False	Normalized unit: Intensity	False	False	170	0	0	null	null	null	null	null	null	null	6043.34	Plasma_003_neg_016	288.93790:7265 289.94256:1511 290.94723:0	null	0	0	0	77	0	0	18237	12344	9909	14521	14346	17298	16608	9931
145	0.57	272.963	0.57/272.9626	Unknown	[M-H]-	null	0.63	False	null	null	null	null	null	null	999	False	False	False	Normalized unit: Intensity	False	False	145	0	0	null	null	null	null	null	null	null	1990.13	Plasma_017_neg_038	272.96259:3222 273.96725:958 274.97192:0	null	0	0	0	0	0	0	1611	5917	6084	1065	1196	1969	1981	1327
149	0.571	274.96	0.57/274.9602	Unknown	[M-H]-	null	0.03	False	null	null	null	null	null	null	999	False	False	False	Normalized unit: Intensity	False	False	149	0	0	null	null	null	null	null	null	null	1066.84	Plasma_017_neg_038	274.96021:1164 275.96487:0 276.96954:0	null	0	0	0	0	0	0	464	685	840	901	331	366	661	779
682	0.577	616.842	0.58/616.8417	Unknown	[M-H]-	null	0.13	False	null	null	null	null	null	null	999	False	False	False	Normalized unit: Intensity	False	False	682	0	0	null	null	null	null	null	null	null	822.69	Plasma_002_neg_015	616.84167:1070 617.84634:281 618.85101:0	null	0	0	0	0	0	0	549	562	494	333	382	466	438	491
691	0.577	632.828	0.58/632.8277	Unknown	[M-H]-	null	0.32	False	null	null	null	null	null	null	999	False	False	False	Normalized unit: Intensity	False	False	691	0	0	null	null	null	null	null	null	null	920.44	Plasma_025_neg_047	632.82770:1326 633.83237:0 634.83703:0	null	0	0	0	0	0	0	708	619	326	349	557	599	554	660
503	0.577	502.861	0.58/502.8608	Unknown	[M-H]-	null	0.9	False	null	null	null	null	null	null	999	False	False	False	Normalized unit: Intensity	False	False	503	0	0	null	null	null	null	null	null	null	1628.2	Plasma_001_neg_014	502.86081:2549 503.86548:203 504.87014:0	null	0	0	0	0	0	0	1629	1443	981	1206	1446	1427	1354	1583
479	0.578	486.889	0.58/486.8893	Unknown	[M-H]-	null	0.91	False	null	null	null	null	null	null	999	False	False	False	Normalized unit: Intensity	False	False	479	0	0	null	null	null	null	null	null	null	1604.14	Plasma_028_neg_051	486.88931:2128 487.89398:519 488.89865:527	null	0	0	0	0	0	0	1260	1415	1362	953	1000	1196	1126	1107
615	0.58	570.856	0.58/570.8556	Unknown	[M-H]-	null	0.88	False	null	null	null	null	null	null	999	False	False	False	Normalized unit: Intensity	False	False	615	0	0	null	null	null	null	null	null	null	1268.2	Plasma_025_neg_047	570.85559:2198 571.86026:0 572.86493:347	null	0	0	0	0	0	0	1092	1010	742	806	957	1037	880	1113
581	0.58	554.87	0.58/554.8696	Unknown	[M-H]-	null	0.88	False	null	null	null	null	null	null	999	False	False	False	Normalized unit: Intensity	False	False	581	0	0	null	null	null	null	null	null	null	1045.47	Plasma_002_neg_015	554.86963:1540 555.87430:400 556.87896:391	null	0	0	0	0	0	0	793	869	847	553	563	711	612	582
304	0.58	356.929	0.58/356.9293	no MS2: Triclabendazole	[M+HCOO]-	null	0.9	False	1.004	356.943	C14H9Cl3N2OS	Diarylethers	NQPDXQQQCQDHHW-UHFFFAOYSA-N	ClC1=CC=CC(OC2=CC=3N=C(SC)NC3C=C2Cl)=C1Cl	530	False	True	False	Normalized unit: Intensity; Annotation method: MSMS-Public_all-neg-VS19_1	False	False	304	0	0	0.64	-1	-1	-1	-1	-1	0.64	231.23	Plasma_043_neg_074	356.93341:1485 357.93808:239 358.94275:0	null	0	0	0	97	0	0	943	1070	1143	728	700	813	807	785
322	0.58	372.906	0.58/372.9064	Unknown	[M-H]-	null	0.91	False	null	null	null	null	null	null	999	False	False	False	Normalized unit: Intensity	False	False	322	0	0	null	null	null	null	null	null	null	846.49	Plasma_025_neg_047	372.90640:2424 373.91107:0 374.91574:0	null	0	0	0	0	0	0	1773	1467	1241	1415	1563	1525	1577	1669
34	0.581	158.981	0.58/158.9813	Unknown	[M-H]-	null	0.03	False	null	null	null	null	null	null	999	False	False	False	Normalized unit: Intensity	False	False	34	0	0	null	null	null	null	null	null	null	1159.97	QC_1-3_neg_055	158.98129:1247 159.98596:0 160.99063:0	null	30	21	0	55	0	0	1608	1896	2375	1973	1088	2685	1510	1079
699	0.582	638.835	0.58/638.8350	Unknown	[M-H]-	null	0.5	False	null	null	null	null	null	null	999	False	False	False	Normalized unit: Intensity	False	False	699	0	0	null	null	null	null	null	null	null	953.68	Plasma_001_neg_014	638.83502:1285 639.83969:0 640.84436:0	null	0	0	0	0	0	0	770	689	469	531	620	607	590	686
391	0.582	424.916	0.58/424.9164	Unknown	[M-H]-	null	0.91	False	null	null	null	null	null	null	999	False	False	False	Normalized unit: Intensity	False	False	391	0	0	null	null	null	null	null	null	null	688.72	Plasma_017_neg_038	424.91641:2027 425.92108:395 426.92575:0	null	0	0	0	0	0	0	1206	1338	1436	934	845	1065	1075	971
409	0.582	440.895	0.58/440.8953	Unknown	[M-H]-	null	0.91	False	null	null	null	null	null	null	999	False	False	False	Normalized unit: Intensity	False	False	409	0	0	null	null	null	null	null	null	null	2299.51	Plasma_018_neg_039	440.89529:3366 441.89996:0 442.90463:0	null	0	0	0	0	0	0	2327	2190	1811	1842	1999	2166	2023	2183
685	0.583	622.858	0.58/622.8584	Unknown	[M-H]-	null	0.09	False	null	null	null	null	null	null	999	False	False	False	Normalized unit: Intensity	False	False	685	0	0	null	null	null	null	null	null	null	822.85	Plasma_002_neg_015	622.85840:1143 623.86307:304 624.86773:0	null	0	0	0	0	0	0	467	603	560	365	344	458	353	380
487	0.584	492.905	0.58/492.9048	no MS2: "3,5-Dichlororsellinic acid"	[M-H2O-H]-	null	0.9	False	-1	492.903	C8H6Cl2O4	Dichlorobenzoic acids	QZKUNAATQJYHIC-UHFFFAOYSA-N	O=C(O)c1c(C)c(Cl)c(O)c(Cl)c1O	530	False	True	False	Normalized unit: Intensity; Annotation method: MSMS-Public_all-neg-VS19_1	False	False	487	0	0	1	-1	-1	-1	-1	-1	1	1045.79	Plasma_009_neg_023	492.90320:1299 493.90787:290 494.91253:0	null	0	0	0	0	0	0	834	974	1089	649	605	787	746	713
511	0.584	508.88	0.58/508.8796	Unknown	[M-H]-	null	0.91	False	null	null	null	null	null	null	999	False	False	False	Normalized unit: Intensity	False	False	511	0	0	null	null	null	null	null	null	null	1811.27	Plasma_008_neg_022	508.87961:2628 509.88428:305 510.88894:0	null	0	0	0	0	0	0	1821	1780	1460	1450	1605	1622	1562	1805
587	0.585	560.893	0.59/560.8925	Unknown	[M-H]-	null	0.56	False	null	null	null	null	null	null	999	False	False	False	Normalized unit: Intensity	False	False	587	0	0	null	null	null	null	null	null	null	887.08	Plasma_017_neg_038	560.89252:1339 561.89718:372 562.90185:0	null	0	0	0	0	0	0	598	708	778	508	443	605	527	495
621	0.585	576.866	0.59/576.8660	Unknown	[M-H]-	null	0.91	False	null	null	null	null	null	null	999	False	False	False	Normalized unit: Intensity	False	False	621	0	0	null	null	null	null	null	null	null	1514.92	Plasma_002_neg_015	576.86603:2246 577.87070:234 578.87536:241	null	0	0	0	0	0	0	1525	1504	1137	1137	1369	1395	1266	1455
106	0.586	242.947	0.59/242.9470	Unknown	[M-H]-	null	0.91	False	null	null	null	null	null	null	999	False	False	False	Normalized unit: Intensity	False	False	106	0	0	null	null	null	null	null	null	null	2576.83	Plasma_018_neg_039	242.94701:3240 243.95167:0 244.95634:0	null	0	0	0	32	0	0	4369	4130	3611	3687	3763	3970	3861	4017
87	0.586	226.967	0.59/226.9668	no MS2: FT-PFSA; C4H5F5O3S	[M-H]-	null	0.91	False	-1	226.981	C4H5F5O3S	Organosulfonic acids	POGJNMOVQNQIGY-UHFFFAOYSA-N	O=S(=O)(O)CCC(F)(F)C(F)(F)F	530	False	True	False	Normalized unit: Intensity; Annotation method: MSMS-Public_all-neg-VS19_1	False	False	87	0	0	0.69	-1	-1	-1	-1	-1	0.69	1590.1	Plasma_046_neg_078	226.97211:1694 227.97677:297 228.98144:0	null	0	0	0	0	0	0	2145	2517	3130	1750	1661	2028	2041	1706
689	0.587	628.88	0.59/628.8797	Unknown	[M-H]-	null	0.03	False	null	null	null	null	null	null	999	False	False	False	Normalized unit: Intensity	False	False	689	0	0	null	null	null	null	null	null	null	823.38	Plasma_017_neg_038	628.87970:1026 629.88437:0 630.88904:0	null	0	0	0	0	0	0	429	517	583	397	344	429	376	328
702	0.587	644.859	0.59/644.8585	Unknown	[M-H]-	null	0.9	False	null	null	null	null	null	null	999	False	False	False	Normalized unit: Intensity	False	False	702	0	0	null	null	null	null	null	null	null	1171.85	Plasma_016_neg_037	644.85852:1634 645.86319:0 646.86786:0	null	0	0	0	0	0	0	1135	1078	901	921	960	1068	1014	1086
731	0.588	712.843	0.59/712.8428	Unknown	[M-H]-	null	0.69	False	null	null	null	null	null	null	999	False	False	False	Normalized unit: Intensity	False	False	731	0	0	null	null	null	null	null	null	null	900.33	Plasma_012_neg_027	712.84277:1241 713.84744:0 714.85211:0	null	0	0	0	0	0	0	789	841	642	601	773	749	649	714
185	0.588	294.96	0.59/294.9598	Unknown	[M-H]-	null	0.91	False	null	null	null	null	null	null	999	False	False	False	Normalized unit: Intensity	False	False	185	0	0	null	null	null	null	null	null	null	523.97	Plasma_034_neg_063	294.95981:2009 295.96448:395 296.96914:0	null	0	0	0	0	0	0	1781	2144	2586	1520	1333	1705	1593	1419
214	0.588	310.932	0.59/310.9316	no MS2: PFSA-unsaturated; C5HF9O3S	[M-H]-	null	0.91	False	-1	310.943	C5HF9O3S	Organosulfonic acids	MABDDTFQDXNBKB-UHFFFAOYSA-N	O=S(=O)(O)C(F)(F)C(F)(F)C(F)(F)C(F)=C(F)F	530	False	True	False	Normalized unit: Intensity; Annotation method: MSMS-Public_all-neg-VS19_1	False	False	214	0	0	0.92	-1	-1	-1	-1	-1	0.92	1922.72	QC_2-4_neg_081	310.93890:1843 311.94357:0 312.94824:0	null	0	0	0	0	0	0	3199	3049	2689	2678	2744	2906	2837	2966
306	0.589	362.945	0.59/362.9449	no MS2: 2,2',6,6'-Tetrachlorobisphenol A	[M-H]-	null	0.91	False	19.009	362.952	C15H12Cl4O2	Bisphenols	KYPYTERUKNKOLP-UHFFFAOYSA-N	CC(C)(C1=CC(Cl)=C(O)C(Cl)=C1)C1=CC(Cl)=C(O)C(Cl)=C1	530	False	True	False	Normalized unit: Intensity; Annotation method: MSMS-Public_all-neg-VS19_1	False	False	306	0	0	0.99	-1	-1	-1	-1	-1	0.99	2235.35	QC_3-4_neg_082	362.95050:2376 363.95517:448 364.95984:0	null	0	0	0	0	0	0	2893	3468	4068	2609	2333	2793	2685	2437
329	0.589	378.919	0.59/378.9192	Unknown	[M-H]-	null	0.91	False	null	null	null	null	null	null	999	False	False	False	Normalized unit: Intensity	False	False	329	0	0	null	null	null	null	null	null	null	2208.87	Plasma_001_neg_014	378.91919:4201 379.92386:369 380.92852:0	null	0	0	0	0	0	0	5798	5511	4941	4878	5260	5292	5222	5312
396	0.59	430.934	0.59/430.9340	no MS2: PFSA-ether; C6HF13O5S	[M-H]-	null	0.69	False	-1	430.926	C6HF13O5S	Organosulfonic acids	NKKFJSGYALGMHM-UHFFFAOYSA-N	O=S(=O)(O)C(F)(F)C(F)(F)C(F)(F)C(F)(F)OC(F)(F)OC(F)(F)F	530	False	True	False	Normalized unit: Intensity; Annotation method: MSMS-Public_all-neg-VS19_1	False	False	396	0	0	0.99	-1	-1	-1	-1	-1	0.99	458.45	Plasma_001_neg_014	430.92789:896 431.93255:0 432.93722:0	null	0	0	0	0	0	0	1026	1190	1462	827	820	1017	963	800
417	0.59	446.913	0.59/446.9131	Unknown	[M-H]-	null	0.91	False	null	null	null	null	null	null	999	False	False	False	Normalized unit: Intensity	False	False	417	0	0	null	null	null	null	null	null	null	2220.91	Plasma_028_neg_051	446.91309:3096 447.91775:362 448.92242:0	null	0	0	0	0	0	0	4047	3924	3447	3456	3730	3767	3658	3723
604	0.591	566.908	0.59/566.9084	Unknown	[M-H]-	null	0.12	False	null	null	null	null	null	null	999	False	False	False	Normalized unit: Intensity	False	False	604	0	0	null	null	null	null	null	null	null	890.39	Plasma_017_neg_038	566.90839:1114 567.91305:282 568.91772:0	null	0	0	0	0	0	0	671	918	1028	601	635	703	616	527
492	0.591	498.921	0.59/498.9210	no MS2: Perfluorooctanesulfonic acid	[M-H]-	null	0.13	False	15.459	498.93	C8HF17O3S	Perfluorooctane sulfonic acid and derivatives	YFSUTJLHUFNCNZ-UHFFFAOYSA-N	OS(=O)(=O)C(F)(F)C(F)(F)C(F)(F)C(F)(F)C(F)(F)C(F)(F)C(F)(F)C(F)(F)F	530	False	True	False	Normalized unit: Intensity; Annotation method: MSMS-Public_all-neg-VS19_1	False	False	492	0	0	0.97	-1	-1	-1	-1	-1	0.97	599.1	Plasma_044_neg_075	498.92780:952 499.93246:0 500.93713:0	null	0	0	0	0	0	0	749	916	1029	698	558	720	703	558
520	0.591	514.9	0.59/514.9004	no MS2: 8-Chloro-1,1,2,2,3,3,4,4,5,5,6,6,7,7,8,8-hexadecafluoro-1-octanesulfonic acid	[M-H]-	null	0.91	False	-1	514.901	C8HClF16O3S	Organosulfonic acids	TXNZTTQBKZRWQR-UHFFFAOYSA-N	O=S(=O)(O)C(F)(F)C(F)(F)C(F)(F)C(F)(F)C(F)(F)C(F)(F)C(F)(F)C(F)(F)Cl	530	False	True	False	Normalized unit: Intensity; Annotation method: MSMS-Public_all-neg-VS19_1	False	False	520	0	0	1	-1	-1	-1	-1	-1	1	2815.03	Plasma_025_neg_047	514.90070:3122 515.90536:188 516.91003:0	null	0	0	0	0	0	0	4331	4221	3628	3763	3941	4152	3965	4003
636	0.592	582.894	0.59/582.8945	Unknown	[M-H]-	null	0.91	False	null	null	null	null	null	null	999	False	False	False	Normalized unit: Intensity	False	False	636	0	0	null	null	null	null	null	null	null	2445	Plasma_036_neg_066	582.89447:2879 583.89914:307 584.90381:0	null	0	0	0	0	0	0	3807	3701	3132	3292	3454	3487	3365	3416
555	0.593	530.87	0.59/530.8704	no MS2: PFSA-Cl; C8HCl2F15O3S	[M-H]-	null	0.03	False	-1	530.871	C8HCl2F15O3S	Organosulfonic acids	UVDYXALMMAGTAG-UHFFFAOYSA-N	O=S(=O)(O)C(F)(F)C(F)(F)C(F)(F)C(F)(F)C(F)(Cl)C(F)(F)C(F)(Cl)C(F)(F)F	530	False	True	False	Normalized unit: Intensity; Annotation method: MSMS-Public_all-neg-VS19_1	False	False	555	0	0	1	-1	-1	-1	-1	-1	1	846.66	Plasma_008_neg_022	530.87042:909 531.87509:0 532.87976:0	null	0	0	0	0	0	0	1216	1149	1153	890	976	1090	1035	1223
707	0.593	650.88	0.59/650.8798	Unknown	[M-H]-	null	0.91	False	null	null	null	null	null	null	999	False	False	False	Normalized unit: Intensity	False	False	707	0	0	null	null	null	null	null	null	null	1848.39	Plasma_036_neg_066	650.87982:2183 651.88449:326 652.88916:0	null	0	0	0	0	0	0	2696	2712	2353	2420	2580	2559	2463	2484
733	0.593	718.869	0.59/718.8685	Unknown	[M-H]-	null	0.9	False	null	null	null	null	null	null	999	False	False	False	Normalized unit: Intensity	False	False	733	0	0	null	null	null	null	null	null	null	1462.6	Plasma_036_neg_066	718.86853:2010 719.87320:339 720.87787:0	null	0	0	0	0	0	0	1997	2098	1752	1876	1949	1983	1819	1711
744	0.594	786.853	0.59/786.8527	Unknown	[M-H]-	null	0.91	False	null	null	null	null	null	null	999	False	False	False	Normalized unit: Intensity	False	False	744	0	0	null	null	null	null	null	null	null	1118.48	Plasma_036_neg_066	786.85272:1424 787.85739:0 788.86206:0	null	0	0	0	0	0	0	1480	1554	1273	1333	1387	1528	1241	1227
771	0.595	854.835	0.60/854.8346	Unknown	[M-H]-	null	0.59	False	null	null	null	null	null	null	999	False	False	False	Normalized unit: Intensity	False	False	771	0	0	null	null	null	null	null	null	null	861.53	Plasma_016_neg_037	854.83459:1028 855.83926:0 856.84393:0	null	0	0	0	0	0	0	1021	1047	806	935	892	954	788	714
663	0.595	598.86	0.60/598.8599	Unknown	[M-H]-	null	0.09	False	null	null	null	null	null	null	999	False	False	False	Normalized unit: Intensity	False	False	663	0	0	null	null	null	null	null	null	null	852.38	Plasma_014_neg_029	598.85992:967 599.86459:0 600.86926:0	null	0	0	0	0	0	0	1279	1194	1173	1052	1049	1138	1129	1331
714	0.596	666.842	0.60/666.8416	Unknown	[M-H]-	null	0.04	False	null	null	null	null	null	null	999	False	False	False	Normalized unit: Intensity	False	False	714	0	0	null	null	null	null	null	null	null	817.85	Plasma_001_neg_014	666.84161:949 667.84628:0 668.85095:0	null	0	0	0	0	0	0	1241	1115	1096	997	902	1062	1096	1270
737	0.597	734.835	0.60/734.8346	Unknown	[M-H]-	null	0.03	False	null	null	null	null	null	null	999	False	False	False	Normalized unit: Intensity	False	False	737	0	0	null	null	null	null	null	null	null	825.72	Plasma_008_neg_022	734.83459:812 735.83926:0 736.84393:0	null	0	0	0	0	0	0	1169	1094	1032	913	970	1051	1019	1183
747	0.613	792.875	0.61/792.8754	Unknown	[M-H]-	null	0.91	False	null	null	null	null	null	null	999	False	False	False	Normalized unit: Intensity	False	False	747	0	0	null	null	null	null	null	null	null	2126.54	Plasma_036_neg_066	792.87543:3021 793.88009:330 794.88476:0	null	0	0	0	0	0	0	3067	3155	2570	4001	3994	3601	3436	2918
772	0.613	860.862	0.61/860.8621	Unknown	[M-H]-	null	0.91	False	null	null	null	null	null	null	999	False	False	False	Normalized unit: Intensity	False	False	772	0	0	null	null	null	null	null	null	null	1423.45	Plasma_036_neg_066	860.86212:1903 861.86679:253 862.87146:0	null	0	0	0	0	0	0	1949	2040	1609	2630	2514	2297	2222	1819
800	0.614	996.841	0.61/996.8410	Unknown	[M-H]-	null	0.06	False	null	null	null	null	null	null	999	False	False	False	Normalized unit: Intensity	False	False	800	0	0	null	null	null	null	null	null	null	900.42	Plasma_036_neg_066	996.84100:1024 997.84567:0 998.85034:0	null	0	0	0	0	0	0	16	0	32	0	0	0	0	22
784	0.614	928.845	0.61/928.8450	Unknown	[M-H]-	null	0.31	False	null	null	null	null	null	null	999	False	False	False	Normalized unit: Intensity	False	False	784	0	0	null	null	null	null	null	null	null	989.05	Plasma_016_neg_037	928.84497:1495 929.84964:229 930.85431:0	null	0	0	0	0	0	0	395	1202	294	974	1650	1477	1392	523
734	0.614	724.884	0.61/724.8843	Unknown	[M-H]-	null	0.91	False	null	null	null	null	null	null	999	False	False	False	Normalized unit: Intensity	False	False	734	0	0	null	null	null	null	null	null	null	2969.31	Plasma_036_neg_066	724.88428:3866 725.88895:573 726.89361:0	null	0	0	0	0	0	0	4564	4672	3872	5807	5798	5327	5043	4411
792	0.615	944.826	0.62/944.8256	Unknown	[M-H]-	null	0.29	False	null	null	null	null	null	null	999	False	False	False	Normalized unit: Intensity	False	False	792	0	0	null	null	null	null	null	null	null	1598.79	Plasma_030_neg_053	944.82562:1823 945.83029:469 946.83496:0	null	0	0	0	0	0	0	0	0	0	0	55	118	0	61
764	0.615	834.857	0.62/834.8570	Unknown	[M-H]-	null	0.24	False	null	null	null	null	null	null	999	False	False	False	Normalized unit: Intensity	False	False	764	0	0	null	null	null	null	null	null	null	874.95	Plasma_036_neg_066	834.85699:1106 835.86166:0 836.86633:0	null	0	0	0	0	0	0	32	19	0	35	46	77	62	48
773	0.615	868.849	0.62/868.8486	Unknown	[M-H]-	null	0.22	False	null	null	null	null	null	null	999	False	False	False	Normalized unit: Intensity	False	False	773	0	0	null	null	null	null	null	null	null	864.62	Plasma_036_neg_066	868.84857:972 869.85324:0 870.85791:0	null	0	0	0	0	0	0	61	0	49	67	266	149	318	367
709	0.615	656.897	0.62/656.8967	no MS2: PFSA-pentafluorosulfide; C9HF23O3S2	[M-H]-	null	0.91	False	-1	656.893	C9HF23O3S2	Organosulfonic acids	GQDNCVBSGIWYLZ-UHFFFAOYSA-N	O=S(=O)(O)C(F)(F)C(F)(F)C(F)(F)C(F)(F)C(F)(F)C(F)(F)C(F)(F)C(F)(F)C(F)(F)S(F)(F)(F)(F)F	530	False	True	False	Normalized unit: Intensity; Annotation method: MSMS-Public_all-neg-VS19_1	False	False	709	0	0	1	-1	-1	-1	-1	-1	1	3938.35	Plasma_023_neg_045	656.89288:4065 657.89755:553 658.90222:0	null	0	0	0	0	0	0	6390	6543	5635	7974	7786	7231	7102	6194
780	0.616	902.845	0.62/902.8446	Unknown	[M-H]-	null	0.24	False	null	null	null	null	null	null	999	False	False	False	Normalized unit: Intensity	False	False	780	0	0	null	null	null	null	null	null	null	852.93	Plasma_036_neg_066	902.84460:1029 903.84927:0 904.85394:0	null	0	0	0	0	0	0	0	0	28	0	46	0	60	60
798	0.616	978.818	0.62/978.8176	Unknown	[M-H]-	null	0.19	False	null	null	null	null	null	null	999	False	False	False	Normalized unit: Intensity	False	False	798	0	0	null	null	null	null	null	null	null	830.75	Plasma_030_neg_053	978.81763:929 979.82229:0 980.82696:0	null	0	0	0	0	0	0	0	0	25	50	228	230	534	135
790	0.616	936.829	0.62/936.8294	Unknown	[M-H]-	null	0.06	False	null	null	null	null	null	null	999	False	False	False	Normalized unit: Intensity	False	False	790	0	0	null	null	null	null	null	null	null	851.94	Plasma_017_neg_038	936.82941:909 937.83407:0 938.83874:0	null	0	0	0	0	0	0	350	670	203	1016	980	868	850	663
741	0.616	766.867	0.62/766.8666	Unknown	[M-H]-	null	0.54	False	null	null	null	null	null	null	999	False	False	False	Normalized unit: Intensity	False	False	741	0	0	null	null	null	null	null	null	null	858.62	Plasma_036_neg_066	766.86658:1004 767.87124:0 768.87591:0	null	0	0	0	0	0	0	62	93	224	1297	1207	1133	268	373
748	0.616	800.851	0.62/800.8515	Unknown	[M-H]-	null	0.66	False	null	null	null	null	null	null	999	False	False	False	Normalized unit: Intensity	False	False	748	0	0	null	null	null	null	null	null	null	878.09	Plasma_016_neg_037	800.85150:1002 801.85617:0 802.86084:0	null	0	0	0	0	0	0	969	966	711	1358	1297	1080	766	989
742	0.616	774.851	0.62/774.8512	Unknown	[M-H]-	null	0.04	False	null	null	null	null	null	null	999	False	False	False	Normalized unit: Intensity	False	False	742	0	0	null	null	null	null	null	null	null	836.04	Plasma_030_neg_053	774.85120:890 775.85586:0 776.86053:0	null	0	0	0	0	0	0	320	348	193	918	988	987	856	997
782	0.616	910.826	0.62/910.8263	Unknown	[M-H]-	null	0.5	False	null	null	null	null	null	null	999	False	False	False	Normalized unit: Intensity	False	False	782	0	0	null	null	null	null	null	null	null	848.32	Plasma_030_neg_053	910.82629:992 911.83096:381 912.83563:0	null	0	0	0	0	0	0	334	538	169	1182	1153	1094	880	1035
641	0.616	588.908	0.62/588.9080	Unknown	[M-H]-	null	0.91	False	null	null	null	null	null	null	999	False	False	False	Normalized unit: Intensity	False	False	641	0	0	null	null	null	null	null	null	null	6427.21	Plasma_036_neg_066	588.90802:7700 589.91269:830 590.91736:223	null	0	0	0	0	0	0	11121	11017	9772	13452	13032	12331	12023	10842
738	0.616	740.859	0.62/740.8589	Unknown	[M-H]-	null	0.91	False	null	null	null	null	null	null	999	False	False	False	Normalized unit: Intensity	False	False	738	0	0	null	null	null	null	null	null	null	3047.72	Plasma_030_neg_053	740.85889:3479 741.86355:598 742.86822:0	null	0	0	0	0	0	0	4615	4487	4474	5400	5357	5136	5072	5227
752	0.616	808.847	0.62/808.8467	Unknown	[M-H]-	null	0.91	False	null	null	null	null	null	null	999	False	False	False	Normalized unit: Intensity	False	False	752	0	0	null	null	null	null	null	null	null	2574.98	Plasma_030_neg_053	808.84668:2924 809.85135:601 810.85602:0	null	0	0	0	0	0	0	3633	3658	3505	4412	4353	4144	3996	4098
775	0.616	876.838	0.62/876.8377	Unknown	[M-H]-	null	0.91	False	null	null	null	null	null	null	999	False	False	False	Normalized unit: Intensity	False	False	775	0	0	null	null	null	null	null	null	null	2017.85	Plasma_030_neg_053	876.83771:2330 877.84238:480 878.84704:0	null	0	0	0	0	0	0	2706	2637	2579	3340	3368	3174	3003	2992
795	0.617	960.79	0.62/960.7900	Unknown	[M-H]-	null	0.53	False	null	null	null	null	null	null	999	False	False	False	Normalized unit: Intensity	False	False	795	0	0	null	null	null	null	null	null	null	862.41	Plasma_008_neg_022	960.78998:1045 961.79465:336 962.79931:0	null	0	0	0	0	0	0	1029	1077	1117	1175	1163	1283	1187	1419
767	0.617	842.841	0.62/842.8411	Unknown	[M-H]-	null	0.59	False	null	null	null	null	null	null	999	False	False	False	Normalized unit: Intensity	False	False	767	0	0	null	null	null	null	null	null	null	864.67	Plasma_030_neg_053	842.84113:1131 843.84579:0 844.85046:0	null	0	0	0	0	0	0	27	60	125	1177	101	1103	1081	255
777	0.617	892.797	0.62/892.7969	Unknown	[M-H]-	null	0.82	False	null	null	null	null	null	null	999	False	False	False	Normalized unit: Intensity	False	False	777	0	0	null	null	null	null	null	null	null	954.68	Plasma_008_neg_022	892.79688:1219 893.80154:0 894.80621:0	null	0	0	0	0	0	0	1262	1296	1437	1432	1558	1428	1432	1742
536	0.617	520.92	0.62/520.9200	Unknown	[M-H]-	null	0.91	False	null	null	null	null	null	null	999	False	False	False	Normalized unit: Intensity	False	False	536	0	0	null	null	null	null	null	null	null	3395.11	Plasma_036_neg_066	520.91998:8816 521.92465:701 522.92932:338	null	0	0	0	0	0	0	13431	13554	11987	15953	15658	14715	14511	13142
716	0.617	672.867	0.62/672.8668	Unknown	[M-H]-	null	0.91	False	null	null	null	null	null	null	999	False	False	False	Normalized unit: Intensity	False	False	716	0	0	null	null	null	null	null	null	null	3317.28	Plasma_021_neg_043	672.86682:3752 673.87149:501 674.87616:313	null	0	0	0	0	0	0	5279	5143	5283	6091	6047	5805	5820	5965
740	0.617	756.822	0.62/756.8217	Unknown	[M-H]-	null	0.91	False	null	null	null	null	null	null	999	False	False	False	Normalized unit: Intensity	False	False	740	0	0	null	null	null	null	null	null	null	1219.44	Plasma_008_neg_022	756.82172:1600 757.82638:217 758.83105:343	null	0	0	0	0	0	0	1755	1721	2085	2027	2028	2059	1925	2404
759	0.617	824.816	0.62/824.8159	Unknown	[M-H]-	null	0.88	False	null	null	null	null	null	null	999	False	False	False	Normalized unit: Intensity	False	False	759	0	0	null	null	null	null	null	null	null	1113.14	Plasma_014_neg_029	824.81592:1458 825.82059:0 826.82525:0	null	0	0	0	0	0	0	1544	1590	1811	1763	1862	1852	1709	2053
797	0.618	970.825	0.62/970.8252	Unknown	[M-H]-	null	0.01	False	null	null	null	null	null	null	999	False	False	False	Normalized unit: Intensity	False	False	797	0	0	null	null	null	null	null	null	null	816.19	Plasma_016_neg_037	970.82520:842 971.82986:0 972.83453:0	null	0	0	0	0	0	0	429	147	221	846	576	372	596	453
736	0.618	732.872	0.62/732.8725	Unknown	[M-H]-	null	0.03	False	null	null	null	null	null	null	999	False	False	False	Normalized unit: Intensity	False	False	736	0	0	null	null	null	null	null	null	null	811.13	Plasma_036_neg_066	732.87250:897 733.87717:0 734.88183:0	null	0	0	0	0	0	0	116	99	105	217	202	111	476	185
9	0.618	112.986	0.62/112.9864	no MS2: Acetylenedicarboxylic acid	[M-H]-	null	1	False	7.691	112.988	C4H2O4	Dicarboxylic acids and derivatives	YTIVTFGABIZHHX-UHFFFAOYSA-N	O=C(O)C#CC(=O)O	530	False	True	False	Normalized unit: Intensity; Annotation method: MSMS-Public_all-neg-VS19_1	False	False	9	0	0	1	-1	-1	-1	-1	-1	1	119.6	Plasma_035_neg_064	112.98800:5690 113.99267:0 114.99733:0	null	2740	2658	2634	1665	2837	2858	14825	14601	14757	16079	15731	15283	15392	15319
113	0.618	248.961	0.62/248.9613	Unknown	[M-H]-	null	1	False	null	null	null	null	null	null	999	False	False	False	Normalized unit: Intensity	False	False	113	0	0	null	null	null	null	null	null	null	9810.47	Plasma_004_neg_017	248.96130:11246 249.96597:517 250.97064:0	null	1557	1533	1553	2048	1508	1578	23329	23002	22638	25834	25553	24681	24665	24240
339	0.618	384.942	0.62/384.9424	Unknown	[M-H]-	null	0.91	False	null	null	null	null	null	null	999	False	False	False	Normalized unit: Intensity	False	False	339	0	0	null	null	null	null	null	null	null	3811.16	Plasma_036_neg_066	384.94241:8495 385.94708:591 386.95175:0	null	267	291	185	516	296	316	15044	14924	14237	17168	17066	16439	16193	15399
429	0.618	452.931	0.62/452.9312	Unknown	[M-H]-	null	0.91	False	null	null	null	null	null	null	999	False	False	False	Normalized unit: Intensity	False	False	429	0	0	null	null	null	null	null	null	null	1695.4	Plasma_036_neg_066	452.93121:9943 453.93588:896 454.94055:0	null	75	50	68	289	42	99	16427	16163	14990	18986	18872	17777	17665	16321
668	0.618	604.881	0.62/604.8808	Unknown	[M-H]-	null	0.91	False	null	null	null	null	null	null	999	False	False	False	Normalized unit: Intensity	False	False	668	0	0	null	null	null	null	null	null	null	4268.23	Plasma_030_neg_053	604.88080:4702 605.88547:520 606.89013:590	null	0	0	0	0	0	0	7047	6870	7146	8012	7978	7832	7668	8049
721	0.618	688.836	0.62/688.8359	Unknown	[M-H]-	null	0.91	False	null	null	null	null	null	null	999	False	False	False	Normalized unit: Intensity	False	False	721	0	0	null	null	null	null	null	null	null	1207.85	Plasma_008_neg_022	688.83588:1588 689.84054:0 690.84521:0	null	0	0	0	0	0	0	1911	1793	2076	2047	2013	2001	1923	2468
684	0.619	620.848	0.62/620.8484	Unknown	[M-H]-	null	0.9	False	null	null	null	null	null	null	999	False	False	False	Normalized unit: Intensity	False	False	684	0	0	null	null	null	null	null	null	null	1272.23	Plasma_008_neg_022	620.84839:1667 621.85306:0 622.85772:0	null	0	0	0	0	0	0	1974	1924	2308	2089	2105	2159	2094	2661
48	0.619	180.974	0.62/180.9736	Unknown	[M-H]-	null	0.91	False	null	null	null	null	null	null	999	False	False	False	Normalized unit: Intensity	False	False	48	0	0	null	null	null	null	null	null	null	2238.41	Plasma_004_neg_017	180.97360:2469 181.97827:0 182.98294:0	null	659	666	601	857	655	385	5287	5193	5121	5781	5675	5450	5611	5549
232	0.619	316.948	0.62/316.9483	Unknown	[M-H]-	null	0.91	False	null	null	null	null	null	null	999	False	False	False	Normalized unit: Intensity	False	False	232	0	0	null	null	null	null	null	null	null	9009.49	QC_3-1_neg_011	316.94830:9755 317.95297:548 318.95764:223	null	733	710	345	1081	768	788	18817	18510	17986	21018	20796	20149	19998	19349
367	0.619	400.911	0.62/400.9114	Unknown	[M-H]-	null	0.91	False	null	null	null	null	null	null	999	False	False	False	Normalized unit: Intensity	False	False	367	0	0	null	null	null	null	null	null	null	790.52	Plasma_008_neg_022	400.91141:2313 401.91608:0 402.92074:0	null	173	27	45	333	136	138	3903	3793	4208	4185	4207	4242	4165	4592
457	0.619	468.899	0.62/468.8988	Unknown	[M-H]-	null	0.91	False	null	null	null	null	null	null	999	False	False	False	Normalized unit: Intensity	False	False	457	0	0	null	null	null	null	null	null	null	3665.65	Plasma_008_neg_022	468.89880:4196 469.90347:334 470.90814:0	null	61	30	0	357	118	100	6682	6571	7172	7430	7448	7252	7264	7805
560	0.619	536.892	0.62/536.8923	Unknown	[M-H]-	null	0.91	False	null	null	null	null	null	null	999	False	False	False	Normalized unit: Intensity	False	False	560	0	0	null	null	null	null	null	null	null	4297.22	Plasma_030_neg_053	536.89227:4789 537.89694:467 538.90161:541	null	0	0	0	84	17	0	7418	6993	7686	8082	8158	7990	7907	8426
577	0.619	552.862	0.62/552.8616	Unknown	[M-H]-	null	0.88	False	null	null	null	null	null	null	999	False	False	False	Normalized unit: Intensity	False	False	577	0	0	null	null	null	null	null	null	null	1098.38	Plasma_008_neg_022	552.86157:1521 553.86624:0 554.87091:216	null	0	0	0	0	0	0	1705	1616	2084	1801	1817	1860	1879	2343
477	0.62	484.873	0.62/484.8726	Unknown	[M-H]-	null	0.24	False	null	null	null	null	null	null	999	False	False	False	Normalized unit: Intensity	False	False	477	0	0	null	null	null	null	null	null	null	481.07	Plasma_008_neg_022	484.87259:1168 485.87726:0 486.88192:0	null	0	0	0	0	0	0	1271	1144	1466	1218	1251	1282	1258	1673
137	0.62	264.935	0.62/264.9349	no MS2: PFAP-PAP; C3H2F7O4P	[M-H]-	null	0.18	False	-1	264.951	C3H2F7O4P	Monoalkyl phosphates	NVBJAOSFGHCYEU-UHFFFAOYSA-N	O=P(O)(O)OC(F)(F)C(F)(F)C(F)(F)F	530	False	True	False	Normalized unit: Intensity; Annotation method: MSMS-Public_all-neg-VS19_1	False	False	137	0	0	0.68	-1	-1	-1	-1	-1	0.68	781.78	Plasma_046_neg_078	264.94180:900 265.94647:0 266.95114:0	null	66	96	117	359	89	257	1390	1271	1636	1405	1509	1488	1467	1803
257	0.62	332.924	0.62/332.9236	no MS2: PFAP-diPAP; C4HF10O4P	[M-H]-	null	0.91	False	-1	332.938	C4HF10O4P	Dialkyl phosphates	HJLWRXZHQHRZCH-UHFFFAOYSA-N	O=P(O)(OC(F)(F)F)OC(F)(F)C(F)(F)C(F)(F)F	530	False	True	False	Normalized unit: Intensity; Annotation method: MSMS-Public_all-neg-VS19_1	False	False	257	0	0	0.73	-1	-1	-1	-1	-1	0.73	1363.17	Plasma_045_neg_076	332.93011:1403 333.93478:0 334.93945:0	null	165	122	81	494	205	267	2553	2442	2822	2677	2729	2681	2659	3170
732	0.627	714.853	0.63/714.8527	Unknown	[M-H]-	null	0.04	False	null	null	null	null	null	null	999	False	False	False	Normalized unit: Intensity	False	False	732	0	0	null	null	null	null	null	null	null	845.04	Plasma_016_neg_037	714.85272:1098 715.85739:0 716.86206:0	null	0	0	0	0	0	0	166	449	331	497	499	429	378	448
735	0.627	730.828	0.63/730.8278	Unknown	[M-H]-	null	0.84	False	null	null	null	null	null	null	999	False	False	False	Normalized unit: Intensity	False	False	735	0	0	null	null	null	null	null	null	null	851.91	Plasma_030_neg_053	730.82782:1118 731.83249:304 732.83716:0	null	0	0	0	0	0	0	583	648	666	610	623	541	658	593
704	0.628	646.866	0.63/646.8661	Unknown	[M-H]-	null	0.78	False	null	null	null	null	null	null	999	False	False	False	Normalized unit: Intensity	False	False	704	0	0	null	null	null	null	null	null	null	912.11	Plasma_036_neg_066	646.86609:1304 647.87076:0 648.87542:511	null	0	0	0	0	0	0	557	561	381	629	609	647	608	392
627	0.628	578.88	0.63/578.8800	Unknown	[M-H]-	null	0.91	False	null	null	null	null	null	null	999	False	False	False	Normalized unit: Intensity	False	False	627	0	0	null	null	null	null	null	null	null	1396	Plasma_036_neg_066	578.88000:2051 579.88467:173 580.88934:0	null	0	0	0	0	0	0	894	919	811	1089	1043	1067	986	893
653	0.628	594.849	0.63/594.8492	Unknown	[M-H]-	null	0.91	False	null	null	null	null	null	null	999	False	False	False	Normalized unit: Intensity	False	False	653	0	0	null	null	null	null	null	null	null	1272.88	Plasma_009_neg_023	594.84918:1647 595.85385:0 596.85852:0	null	0	0	0	0	0	0	960	1036	1121	1021	1015	967	1088	954
711	0.628	662.836	0.63/662.8363	Unknown	[M-H]-	null	0.91	False	null	null	null	null	null	null	999	False	False	False	Normalized unit: Intensity	False	False	711	0	0	null	null	null	null	null	null	null	994.3	Plasma_009_neg_023	662.83630:1374 663.84097:0 664.84564:0	null	0	0	0	0	0	0	717	798	849	703	682	692	741	698
514	0.629	510.886	0.63/510.8857	Unknown	[M-H]-	null	0.91	False	null	null	null	null	null	null	999	False	False	False	Normalized unit: Intensity	False	False	514	0	0	null	null	null	null	null	null	null	1743.14	Plasma_016_neg_037	510.88571:2619 511.89038:0 512.89505:0	null	0	0	0	0	0	0	1244	1319	1131	1393	1447	1433	1311	1100
546	0.629	526.857	0.63/526.8569	Unknown	[M-H]-	null	0.91	False	null	null	null	null	null	null	999	False	False	False	Normalized unit: Intensity	False	False	546	0	0	null	null	null	null	null	null	null	1329.08	Plasma_003_neg_016	526.85687:1507 527.86154:0 528.86621:0	null	0	0	0	0	0	0	1135	1219	1214	1151	1132	1082	1142	1207
413	0.63	444.897	0.63/444.8966	Unknown	[M-H]-	null	0.03	False	null	null	null	null	null	null	999	False	False	False	Normalized unit: Intensity	False	False	413	0	0	null	null	null	null	null	null	null	806.84	Plasma_022_neg_044	444.89661:966 445.90127:0 446.90594:0	null	0	0	0	0	0	0	508	501	494	521	563	556	596	477
411	0.63	442.898	0.63/442.8981	Unknown	[M-H]-	null	0.91	False	null	null	null	null	null	null	999	False	False	False	Normalized unit: Intensity	False	False	411	0	0	null	null	null	null	null	null	null	1986.65	Plasma_016_neg_037	442.89810:2612 443.90277:214 444.90744:0	null	0	0	0	0	0	0	1564	1564	1410	1787	1741	1727	1678	1549
438	0.63	458.872	0.63/458.8715	Unknown	[M-H]-	null	0.91	False	null	null	null	null	null	null	999	False	False	False	Normalized unit: Intensity	False	False	438	0	0	null	null	null	null	null	null	null	1178.9	Plasma_008_neg_022	458.87149:1533 459.87616:0 460.88083:0	null	0	0	0	0	0	0	1139	1141	1271	1028	1100	1024	1150	1203
351	0.631	390.884	0.63/390.8837	Unknown	[M-H]-	null	0.25	False	null	null	null	null	null	null	999	False	False	False	Normalized unit: Intensity	False	False	351	0	0	null	null	null	null	null	null	null	837.04	Plasma_003_neg_016	390.88370:976 391.88837:0 392.89303:0	null	0	0	0	0	0	0	777	774	968	731	722	669	818	786
613	0.632	568.843	0.63/568.8435	Unknown	[M-H]-	null	0.15	False	null	null	null	null	null	null	999	False	False	False	Normalized unit: Intensity	False	False	613	0	0	null	null	null	null	null	null	null	835.77	Plasma_016_neg_037	568.84351:1132 569.84817:0 570.85284:0	null	0	0	0	0	0	0	551	505	512	619	593	614	624	698
199	0.632	306.925	0.63/306.9250	no MS2: PFSA-pentafluorosulfide; C2HF9O3S2	[M-H]-	null	0.91	False	-1	306.915	C2HF9O3S2	Organosulfonic acids	JPQUOEVJGVZENU-UHFFFAOYSA-N	O=S(=O)(O)C(F)(F)C(F)(F)S(F)(F)(F)(F)F	530	False	True	False	Normalized unit: Intensity; Annotation method: MSMS-Public_all-neg-VS19_1	False	False	199	0	0	0.94	-1	-1	-1	-1	-1	0.94	2662.8	QC_1-1_neg_009	306.91870:2826 307.92337:0 308.92804:0	null	0	0	0	21	0	0	2665	2745	2575	2821	2808	2862	2815	2648
207	0.632	308.922	0.63/308.9218	Unknown	[M-H]-	null	0.9	False	null	null	null	null	null	null	999	False	False	False	Normalized unit: Intensity	False	False	207	0	0	null	null	null	null	null	null	null	696.37	Plasma_036_neg_066	308.92181:1105 309.92648:0 310.93115:0	null	0	0	0	0	0	0	815	814	863	951	893	897	908	848
323	0.632	374.91	0.63/374.9103	Unknown	[M-H]-	null	0.91	False	null	null	null	null	null	null	999	False	False	False	Normalized unit: Intensity	False	False	323	0	0	null	null	null	null	null	null	null	647.32	Plasma_016_neg_037	374.91031:2524 375.91498:189 376.91964:0	null	0	0	0	0	0	0	1611	1641	1488	1810	1803	1760	1709	1569
637	0.633	584.822	0.63/584.8222	Unknown	[M-H]-	null	0.06	False	null	null	null	null	null	null	999	False	False	False	Normalized unit: Intensity	False	False	637	0	0	null	null	null	null	null	null	null	807.66	Plasma_020_neg_041	584.82220:899 585.82687:0 586.83154:0	null	0	0	0	0	0	0	560	557	533	567	556	524	594	521
101	0.633	238.932	0.63/238.9319	Unknown	[M-H]-	null	0.91	False	null	null	null	null	null	null	999	False	False	False	Normalized unit: Intensity	False	False	101	0	0	null	null	null	null	null	null	null	2781.06	QC_2-1_neg_010	238.93190:3076 239.93657:0 240.94124:0	null	0	0	0	0	0	13	3065	3120	2993	3262	3215	3190	3176	3140
102	0.633	240.933	0.63/240.9331	Unknown	[M-H]-	null	0.91	False	null	null	null	null	null	null	999	False	False	False	Normalized unit: Intensity	False	False	102	0	0	null	null	null	null	null	null	null	946.28	Plasma_036_neg_066	240.93311:1173 241.93777:0 242.94244:0	null	0	0	0	0	0	0	1048	1032	964	1075	975	1074	1029	975
499	0.633	500.861	0.63/500.8610	Unknown	[M-H]-	null	0.87	False	null	null	null	null	null	null	999	False	False	False	Normalized unit: Intensity	False	False	499	0	0	null	null	null	null	null	null	null	922.4	Plasma_036_neg_066	500.86099:1243 501.86566:0 502.87033:0	null	0	0	0	0	0	0	694	668	610	776	748	803	729	687
526	0.634	516.837	0.63/516.8371	Unknown	[M-H]-	null	0.19	False	null	null	null	null	null	null	999	False	False	False	Normalized unit: Intensity	False	False	526	0	0	null	null	null	null	null	null	null	817.61	QC_3-4_neg_082	516.83710:939 517.84176:0 518.84643:0	null	0	0	0	0	0	0	625	656	694	587	571	635	607	662
399	0.635	432.873	0.64/432.8729	Unknown	[M-H]-	null	0.91	False	null	null	null	null	null	null	999	False	False	False	Normalized unit: Intensity	False	False	399	0	0	null	null	null	null	null	null	null	960.07	Plasma_036_neg_066	432.87289:1320 433.87756:0 434.88223:0	null	0	0	0	0	0	0	782	805	697	849	888	856	863	771
310	0.637	364.885	0.64/364.8848	Unknown	[M-H]-	null	0.87	False	null	null	null	null	null	null	999	False	False	False	Normalized unit: Intensity	False	False	310	0	0	null	null	null	null	null	null	null	904.22	Plasma_036_neg_066	364.88480:1220 365.88946:0 366.89413:0	null	0	0	0	0	0	0	848	857	766	892	945	919	909	820
189	0.638	296.894	0.64/296.8935	Unknown	[M-H]-	null	0.91	False	null	null	null	null	null	null	999	False	False	False	Normalized unit: Intensity	False	False	189	0	0	null	null	null	null	null	null	null	1720.22	Plasma_017_neg_038	296.89349:2068 297.89816:0 298.90283:0	null	0	0	0	0	0	0	1874	1973	1809	2005	2003	2005	1881	1823
191	0.638	298.89	0.64/298.8905	Unknown	[M-H]-	null	0.91	False	null	null	null	null	null	null	999	False	False	False	Normalized unit: Intensity	False	False	191	0	0	null	null	null	null	null	null	null	1062.86	Plasma_017_neg_038	298.89050:1344 299.89517:0 300.89984:0	null	0	0	0	0	0	0	1215	1211	1166	1335	1269	1306	1314	1230
6	0.639	102.958	0.64/102.9584	Unknown	[M-H]-	null	0.91	False	null	null	null	null	null	null	999	False	False	False	Normalized unit: Intensity	False	False	6	0	0	null	null	null	null	null	null	null	1587.02	Plasma_030_neg_053	102.95840:1790 103.96306:0 104.96773:0	null	0	0	0	0	0	0	2451	2464	2386	2492	2350	2484	2471	2576
91	0.64	228.906	0.64/228.9059	Unknown	[M-H]-	null	0.91	False	null	null	null	null	null	null	999	False	False	False	Normalized unit: Intensity	False	False	91	0	0	null	null	null	null	null	null	null	1339.92	Plasma_019_neg_040	228.90590:1614 229.91057:0 230.91523:0	null	0	0	0	0	0	0	1620	1647	1636	1688	1722	1720	1605	1569
95	0.64	230.901	0.64/230.9007	Unknown	[M-H]-	null	0.91	False	null	null	null	null	null	null	999	False	False	False	Normalized unit: Intensity	False	False	95	0	0	null	null	null	null	null	null	null	879.43	Plasma_006_neg_020	230.90070:1071 231.90536:0 232.91003:0	null	0	0	0	0	0	0	1063	1042	1010	1125	1017	1113	1074	1018
166	0.644	286.866	0.64/286.8663	Unknown	[M-H]-	null	0.91	False	null	null	null	null	null	null	999	False	False	False	Normalized unit: Intensity	False	False	166	0	0	null	null	null	null	null	null	null	1235.25	Plasma_041_neg_072	286.86630:1522 287.87097:0 288.87564:0	null	0	0	0	0	0	0	1450	1534	1378	1539	1453	1531	1421	1387
169	0.644	288.861	0.64/288.8611	Unknown	[M-H]-	null	0.91	False	null	null	null	null	null	null	999	False	False	False	Normalized unit: Intensity	False	False	169	0	0	null	null	null	null	null	null	null	1200.07	Plasma_016_neg_037	288.86111:1322 289.86578:0 290.87045:0	null	0	0	0	0	0	0	1496	1483	1340	1513	1437	1522	1345	1298
152	0.652	276.834	0.65/276.8345	Unknown	[M-H]-	null	0.88	False	null	null	null	null	null	null	999	False	False	False	Normalized unit: Intensity	False	False	152	0	0	null	null	null	null	null	null	null	953.18	Plasma_015_neg_030	276.83450:1164 277.83917:0 278.84384:0	null	0	0	0	0	0	0	1290	1331	1196	1293	1119	1299	1190	1180
155	0.652	278.833	0.65/278.8328	Unknown	[M-H]-	null	0.91	False	null	null	null	null	null	null	999	False	False	False	Normalized unit: Intensity	False	False	155	0	0	null	null	null	null	null	null	null	1225.35	Plasma_016_neg_037	278.83279:1376 279.83746:0 280.84213:0	null	0	0	0	0	0	0	1785	1587	1596	1781	1739	1470	1518	1528
762	0.662	830.369	0.66/830.3685	Unknown	[M-H]-	null	0.04	False	null	null	null	null	null	null	999	False	False	False	Normalized unit: Intensity	False	False	762	0	0	null	null	null	null	null	null	null	817.65	Plasma_006_neg_020	830.36853:983 831.37320:0 832.37787:0	null	0	0	0	0	0	0	745	686	679	696	702	682	620	618
750	0.662	808.412	0.66/808.4117	Unknown	[M-H]-	null	0.32	False	null	null	null	null	null	null	999	False	False	False	Normalized unit: Intensity	False	False	750	0	0	null	null	null	null	null	null	null	924.17	Plasma_036_neg_066	808.41168:1163 809.41635:0 810.42102:0	null	0	0	0	0	0	0	45	206	140	95	309	231	426	407
758	0.662	824.381	0.66/824.3811	Unknown	[M-H]-	null	0.74	False	null	null	null	null	null	null	999	False	False	False	Normalized unit: Intensity	False	False	758	0	0	null	null	null	null	null	null	null	902.88	QC_2-2_neg_033	824.38110:1011 825.38577:0 826.39044:0	null	0	0	0	0	0	0	887	897	777	780	900	840	794	723
760	0.662	826.384	0.66/826.3837	Unknown	[M-H]-	null	0.91	False	null	null	null	null	null	null	999	False	False	False	Normalized unit: Intensity	False	False	760	0	0	null	null	null	null	null	null	null	1150.52	QC_1-3_neg_055	826.38373:1355 827.38840:0 828.39306:0	null	0	0	0	0	0	0	1076	1153	1056	1079	1138	1139	1008	1038
761	0.662	828.383	0.66/828.3831	Unknown	[M-H]-	null	0.91	False	null	null	null	null	null	null	999	False	False	False	Normalized unit: Intensity	False	False	761	0	0	null	null	null	null	null	null	null	1050.36	Plasma_043_neg_074	828.38312:1237 829.38779:0 830.39245:0	null	0	0	0	0	0	0	986	1060	984	964	991	1093	961	917
766	0.663	842.351	0.66/842.3515	Unknown	[M-H]-	null	0.07	False	null	null	null	null	null	null	999	False	False	False	Normalized unit: Intensity	False	False	766	0	0	null	null	null	null	null	null	null	842.34	Plasma_003_neg_016	842.35150:902 843.35617:0 844.36084:0	null	0	0	0	0	0	0	658	694	740	577	616	708	598	693
755	0.663	814.398	0.66/814.3975	Unknown	[M-H]-	null	0.06	False	null	null	null	null	null	null	999	False	False	False	Normalized unit: Intensity	False	False	755	0	0	null	null	null	null	null	null	null	841.08	Plasma_016_neg_037	814.39752:1036 815.40219:0 816.40686:0	null	0	0	0	0	0	0	641	689	503	693	619	610	609	490
645	0.663	590.545	0.66/590.5449	Unknown	[M-H]-	null	0.37	False	null	null	null	null	null	null	999	False	False	False	Normalized unit: Intensity	False	False	645	0	0	null	null	null	null	null	null	null	836.64	Plasma_008_neg_022	590.54492:1024 591.54959:0 592.55426:0	null	0	0	0	0	0	0	809	810	895	725	765	711	763	885
697	0.663	636.527	0.66/636.5265	Unknown	[M-H]-	null	0.09	False	null	null	null	null	null	null	999	False	False	False	Normalized unit: Intensity	False	False	697	0	0	null	null	null	null	null	null	null	819.19	Plasma_017_neg_038	636.52649:894 637.53116:0 638.53582:0	null	0	0	0	0	0	0	634	661	615	628	649	659	680	593
693	0.663	634.529	0.66/634.5293	Unknown	[M-H]-	null	0.12	False	null	null	null	null	null	null	999	False	False	False	Normalized unit: Intensity	False	False	693	0	0	null	null	null	null	null	null	null	816.44	Plasma_017_neg_038	634.52930:966 635.53396:285 636.53863:0	null	0	0	0	0	0	0	582	682	583	698	627	705	591	585
753	0.663	810.402	0.66/810.4019	Unknown	[M-H]-	null	0.91	False	null	null	null	null	null	null	999	False	False	False	Normalized unit: Intensity	False	False	753	0	0	null	null	null	null	null	null	null	1177.02	Plasma_016_neg_037	810.40192:1540 811.40658:0 812.41125:0	null	0	0	0	0	0	0	1067	1142	924	1161	1092	1138	989	837
754	0.663	812.4	0.66/812.3996	Unknown	[M-H]-	null	0.91	False	null	null	null	null	null	null	999	False	False	False	Normalized unit: Intensity	False	False	754	0	0	null	null	null	null	null	null	null	1062.1	Plasma_016_neg_037	812.39960:1460 813.40426:0 814.40893:0	null	0	0	0	0	0	0	943	1002	833	1039	963	1013	943	774
619	0.664	574.576	0.66/574.5755	Unknown	[M-H]-	null	0.91	False	null	null	null	null	null	null	999	False	False	False	Normalized unit: Intensity	False	False	619	0	0	null	null	null	null	null	null	null	1182.24	Plasma_022_neg_044	574.57550:1482 575.58017:0 576.58484:0	null	0	0	0	0	0	0	1253	1276	1109	1274	1222	1260	1151	1090
620	0.664	576.571	0.66/576.5707	Unknown	[M-H]-	null	0.91	False	null	null	null	null	null	null	999	False	False	False	Normalized unit: Intensity	False	False	620	0	0	null	null	null	null	null	null	null	1761.9	Plasma_017_neg_038	576.57068:2094 577.57535:0 578.58001:0	null	0	0	0	0	0	0	1856	2012	1844	1924	1962	1989	1709	1712
626	0.664	578.568	0.66/578.5679	Unknown	[M-H]-	null	0.91	False	null	null	null	null	null	null	999	False	False	False	Normalized unit: Intensity	False	False	626	0	0	null	null	null	null	null	null	null	1561.37	Plasma_017_neg_038	578.56787:1887 579.57254:0 580.57721:0	null	0	0	0	0	0	0	1636	1725	1596	1621	1680	1725	1528	1477
633	0.664	580.566	0.66/580.5657	Unknown	[M-H]-	null	0.91	False	null	null	null	null	null	null	999	False	False	False	Normalized unit: Intensity	False	False	633	0	0	null	null	null	null	null	null	null	912.86	Plasma_017_neg_038	580.56567:1046 581.57034:0 582.57501:0	null	0	0	0	0	0	0	916	957	858	982	956	980	862	815
647	0.664	592.54	0.66/592.5402	Unknown	[M-H]-	null	0.91	False	null	null	null	null	null	null	999	False	False	False	Normalized unit: Intensity	False	False	647	0	0	null	null	null	null	null	null	null	1126.08	Plasma_003_neg_016	592.54022:1480 593.54489:0 594.54956:0	null	0	0	0	0	0	0	1285	1209	1343	1128	1123	1219	1065	1279
652	0.664	594.549	0.66/594.5491	Unknown	[M-H]-	null	0.91	False	null	null	null	null	null	null	999	False	False	False	Normalized unit: Intensity	False	False	652	0	0	null	null	null	null	null	null	null	1036.59	Plasma_040_neg_070	594.54907:1317 595.55374:0 596.55841:0	null	0	0	0	0	0	0	1151	1136	1239	1049	1046	1098	1050	1151
437	0.665	458.656	0.67/458.6560	Unknown	[M-H]-	null	0.91	False	null	null	null	null	null	null	999	False	False	False	Normalized unit: Intensity	False	False	437	0	0	null	null	null	null	null	null	null	1010.39	Plasma_017_neg_038	458.65601:1225 459.66067:0 460.66534:0	null	0	0	0	0	0	0	1096	1150	1134	1082	1142	1175	1012	1039
441	0.665	460.654	0.67/460.6535	Unknown	[M-H]-	null	0.91	False	null	null	null	null	null	null	999	False	False	False	Normalized unit: Intensity	False	False	441	0	0	null	null	null	null	null	null	null	1190.41	Plasma_022_neg_044	460.65350:1461 461.65817:0 462.66284:0	null	0	0	0	0	0	0	1341	1391	1348	1334	1318	1389	1267	1219
442	0.665	462.649	0.67/462.6494	Unknown	[M-H]-	null	0.28	False	null	null	null	null	null	null	999	False	False	False	Normalized unit: Intensity	False	False	442	0	0	null	null	null	null	null	null	null	817.54	QC_3-2_neg_034	462.64941:983 463.65408:0 464.65875:0	null	0	0	0	0	0	0	848	911	875	838	843	831	741	790
498	0.665	500.643	0.67/500.6429	Unknown	[M-H]-	null	0.65	False	null	null	null	null	null	null	999	False	False	False	Normalized unit: Intensity	False	False	498	0	0	null	null	null	null	null	null	null	855	Plasma_036_neg_066	500.64291:1160 501.64758:0 502.65225:0	null	0	0	0	0	0	0	860	873	749	885	878	904	843	732
525	0.665	516.618	0.67/516.6178	Unknown	[M-H]-	null	0.91	False	null	null	null	null	null	null	999	False	False	False	Normalized unit: Intensity	False	False	525	0	0	null	null	null	null	null	null	null	950.52	Plasma_026_neg_049	516.61780:1062 517.62247:0 518.62713:0	null	0	0	0	0	0	0	964	960	917	986	974	1010	938	947
531	0.665	518.615	0.67/518.6153	Unknown	[M-H]-	null	0.91	False	null	null	null	null	null	null	999	False	False	False	Normalized unit: Intensity	False	False	531	0	0	null	null	null	null	null	null	null	1262.25	QC_2-3_neg_056	518.61530:1501 519.61996:0 520.62463:0	null	0	0	0	0	0	0	1360	1457	1294	1351	1407	1340	1285	1277
535	0.665	520.613	0.67/520.6133	Unknown	[M-H]-	null	0.91	False	null	null	null	null	null	null	999	False	False	False	Normalized unit: Intensity	False	False	535	0	0	null	null	null	null	null	null	null	977.21	QC_3-3_neg_057	520.61328:1205 521.61795:0 522.62262:0	null	0	0	0	0	0	0	941	1075	1002	1009	1073	990	983	963
585	0.665	558.602	0.67/558.6024	Unknown	[M-H]-	null	0.5	False	null	null	null	null	null	null	999	False	False	False	Normalized unit: Intensity	False	False	585	0	0	null	null	null	null	null	null	null	860.88	Plasma_036_neg_066	558.60242:1173 559.60708:0 560.61175:0	null	0	0	0	0	0	0	679	842	637	868	858	820	727	665
586	0.665	560.6	0.67/560.6004	Unknown	[M-H]-	null	0.91	False	null	null	null	null	null	null	999	False	False	False	Normalized unit: Intensity	False	False	586	0	0	null	null	null	null	null	null	null	1160.1	Plasma_036_neg_066	560.60040:1591 561.60507:0 562.60974:0	null	0	0	0	0	0	0	1194	1274	967	1240	1220	1201	1104	1023
591	0.665	562.593	0.67/562.5932	Unknown	[M-H]-	null	0.88	False	null	null	null	null	null	null	999	False	False	False	Normalized unit: Intensity	False	False	591	0	0	null	null	null	null	null	null	null	994.87	Plasma_016_neg_037	562.59320:1431 563.59787:0 564.60254:0	null	0	0	0	0	0	0	959	1065	851	1068	1078	1054	950	793
142	0.666	268.806	0.67/268.8056	Unknown	[M-H]-	null	0.91	False	null	null	null	null	null	null	999	False	False	False	Normalized unit: Intensity	False	False	142	0	0	null	null	null	null	null	null	null	4324.9	Plasma_036_neg_066	268.80560:5027 269.81027:0 270.81494:0	null	0	0	0	0	0	0	6125	6335	5755	6287	6305	6299	5798	5546
144	0.666	272.797	0.67/272.7972	Unknown	[M-H]-	null	0.9	False	null	null	null	null	null	null	999	False	False	False	Normalized unit: Intensity	False	False	144	0	0	null	null	null	null	null	null	null	933.16	Plasma_016_neg_037	272.79721:1212 273.80188:0 274.80655:0	null	0	0	0	0	0	0	1147	1249	1099	1238	1284	1257	1124	1079
162	0.666	284.775	0.67/284.7751	Unknown	[M-H]-	null	0.91	False	null	null	null	null	null	null	999	False	False	False	Normalized unit: Intensity	False	False	162	0	0	null	null	null	null	null	null	null	1272.87	Plasma_003_neg_016	284.77509:1559 285.77975:0 286.78442:0	null	0	0	0	0	0	0	1926	1927	2085	1851	1875	1901	1776	2001
165	0.666	286.773	0.67/286.7728	Unknown	[M-H]-	null	0.85	False	null	null	null	null	null	null	999	False	False	False	Normalized unit: Intensity	False	False	165	0	0	null	null	null	null	null	null	null	896.52	Plasma_003_neg_016	286.77280:1080 287.77746:0 288.78213:504	null	0	0	0	0	0	0	1308	1322	1432	1225	1201	1295	1165	1326
410	0.666	442.685	0.67/442.6845	Unknown	[M-H]-	null	0.85	False	null	null	null	null	null	null	999	False	False	False	Normalized unit: Intensity	False	False	410	0	0	null	null	null	null	null	null	null	905.12	Plasma_036_neg_066	442.68451:1307 443.68918:0 444.69384:0	null	0	0	0	0	0	0	938	956	803	977	957	961	902	808
412	0.666	444.683	0.67/444.6826	Unknown	[M-H]-	null	0.91	False	null	null	null	null	null	null	999	False	False	False	Normalized unit: Intensity	False	False	412	0	0	null	null	null	null	null	null	null	991.35	Plasma_036_neg_066	444.68259:1303 445.68725:0 446.69192:0	null	0	0	0	0	0	0	1020	1165	914	1095	1117	1151	980	873
502	0.666	502.641	0.67/502.6407	Unknown	[M-H]-	null	0.91	False	null	null	null	null	null	null	999	False	False	False	Normalized unit: Intensity	False	False	502	0	0	null	null	null	null	null	null	null	1060.96	Plasma_036_neg_066	502.64069:1363 503.64535:0 504.65002:0	null	0	0	0	0	0	0	1173	1103	943	1177	1125	1131	1064	917
506	0.666	504.634	0.67/504.6342	Unknown	[M-H]-	null	0.26	False	null	null	null	null	null	null	999	False	False	False	Normalized unit: Intensity	False	False	506	0	0	null	null	null	null	null	null	null	858.41	Plasma_016_neg_037	504.63419:1159 505.63885:0 506.64352:0	null	0	0	0	0	0	0	741	798	660	823	810	801	726	624
75	0.667	208.847	0.67/208.8470	Unknown	[M-H]-	null	0.91	False	null	null	null	null	null	null	999	False	False	False	Normalized unit: Intensity	False	False	75	0	0	null	null	null	null	null	null	null	1004.36	Plasma_017_neg_038	208.84700:1224 209.85167:0 210.85634:0	null	0	0	0	0	0	0	1590	1687	1617	1643	1663	1638	1601	1481
76	0.667	210.844	0.67/210.8442	Unknown	[M-H]-	null	0.91	False	null	null	null	null	null	null	999	False	False	False	Normalized unit: Intensity	False	False	76	0	0	null	null	null	null	null	null	null	1317.7	Plasma_017_neg_038	210.84419:1414 211.84886:0 212.85353:0	null	0	0	0	0	0	0	2088	2314	2086	2207	2193	2212	2087	1965
140	0.667	266.808	0.67/266.8082	Unknown	[M-H]-	null	0.91	False	null	null	null	null	null	null	999	False	False	False	Normalized unit: Intensity	False	False	140	0	0	null	null	null	null	null	null	null	2697.85	Plasma_036_neg_066	266.80820:3272 267.81286:0 268.81753:0	null	0	0	0	0	0	0	3748	3964	3610	3882	3845	3926	3466	3428
143	0.667	270.801	0.67/270.8006	Unknown	[M-H]-	null	0.91	False	null	null	null	null	null	null	999	False	False	False	Normalized unit: Intensity	False	False	143	0	0	null	null	null	null	null	null	null	2832.57	Plasma_016_neg_037	270.80060:3191 271.80527:0 272.80993:0	null	0	0	0	0	0	0	4023	4203	3825	4143	4136	4157	3766	3603
158	0.667	282.779	0.67/282.7785	Unknown	[M-H]-	null	0.12	False	null	null	null	null	null	null	999	False	False	False	Normalized unit: Intensity	False	False	158	0	0	null	null	null	null	null	null	null	832.59	Plasma_003_neg_016	282.77850:916 283.78317:0 284.78784:0	null	0	0	0	0	0	0	1108	1071	1216	963	1038	975	951	1073
244	0.667	326.765	0.67/326.7651	no MS2: 2,4,6-Tribromphenol	[M-H]-	null	0.9	False	11.937	326.766	C6H3Br3O	P-bromophenols	BSWWXRFVMJHFBN-UHFFFAOYSA-N	OC1=C(Br)C=C(Br)C=C1Br	530	False	True	False	Normalized unit: Intensity; Annotation method: MSMS-Public_all-neg-VS19_1	False	False	244	0	0	1	-1	-1	-1	-1	-1	1	944.84	Plasma_034_neg_063	326.76611:1017 327.77078:0 328.77545:0	null	0	0	0	0	0	0	1065	1171	1027	1162	1103	1092	998	916
248	0.667	328.76	0.67/328.7598	Unknown	[M-H]-	null	0.25	False	null	null	null	null	null	null	999	False	False	False	Normalized unit: Intensity	False	False	248	0	0	null	null	null	null	null	null	null	835.88	Plasma_016_neg_037	328.75980:1134 329.76446:0 330.76913:0	null	0	0	0	0	0	0	864	929	855	851	978	990	868	716
338	0.667	384.725	0.67/384.7252	Unknown	[M-H]-	null	0.01	False	null	null	null	null	null	null	999	False	False	False	Normalized unit: Intensity	False	False	338	0	0	null	null	null	null	null	null	null	801.44	Plasma_036_neg_066	384.72519:811 385.72986:0 386.73452:0	null	0	0	0	0	0	0	670	674	580	725	699	708	640	577
3	0.668	92.9283	0.67/92.9283	Unknown	[M-H]-	null	0.91	False	null	null	null	null	null	null	999	False	False	False	Normalized unit: Intensity	False	False	3	0	0	null	null	null	null	null	null	null	2994.87	Plasma_006_neg_020	92.92830:3368 93.93297:0 94.93763:0	null	0	0	0	0	0	0	6171	6134	6082	6027	6155	6273	5908	5951
4	0.668	94.927	0.67/94.9270	Unknown	[M-H]-	null	0.91	False	null	null	null	null	null	null	999	False	False	False	Normalized unit: Intensity	False	False	4	0	0	null	null	null	null	null	null	null	2087.94	Plasma_041_neg_072	94.92700:2227 95.93167:0 96.93634:0	null	0	0	0	0	0	0	4229	4263	4162	4135	4188	4252	4094	4058
37	0.674	162.841	0.67/162.8409	Unknown	[M-H]-	null	0.91	False	null	null	null	null	null	null	999	False	False	False	Normalized unit: Intensity	False	False	37	0	0	null	null	null	null	null	null	null	47.89	Plasma_017_neg_038	162.84090:2619 163.84556:0 164.85023:0	null	425	428	23	601	414	415	1619	2016	2133	1840	1981	2159	1964	1635
25	0.685	145.063	0.69/145.0627	no MS2: L-GLUTAMINE	[M-H]-	null	0.9	False	6.045	145.062	C5H10N2O3	Alpha amino acids	ZDXPYRJPNDTMRX-VKHMYHEASA-N	C(CC(=O)N)[C@@H](C(=O)O)N	530	False	True	False	Normalized unit: Intensity; Annotation method: MSMS-Public_all-neg-VS19_1	False	False	25	0	0	1	-1	-1	-1	-1	-1	1	43.9	QC_2-1_neg_010	145.06190:1985 146.06657:147 147.07124:0	null	0	0	0	0	0	0	2825	2640	3127	1683	1917	1721	5051	2848
80	0.697	215.126	0.70/215.1259	no MS2: (2R)-2-[(2R,5S)-5-[(2S)-2-hydroxybutyl]oxolan-2-yl]propanoic acid	[M-H]-	null	0.49	False	2.566	215.129	C11H20O4	Tetrahydrofurans	HTCUURQJNZBKIA-XFWSIPNHSA-N	O=C(O)C(C)C1OC(CC1)CC(O)CC	530	False	True	False	Normalized unit: Intensity; Annotation method: MSMS-Public_all-neg-VS19_1	False	False	80	0	0	1	-1	-1	-1	-1	-1	1	1458.7	Plasma_004_neg_017	215.12981:1342 216.13447:0 217.13914:0	null	0	0	0	0	0	0	394	476	425	1703	139	324	701	446
104	0.698	242.081	0.70/242.0805	no MS2: Cytidine	[M-H]-	null	0.01	False	1.696	242.078	C9H13N3O5	Pyrimidine nucleosides	UHDGCWIWMRVCDJ-XVFCMESISA-N	C1=CN(C(=O)N=C1N)[C@H]2[C@@H]([C@@H]([C@H](O2)CO)O)O	530	False	True	False	Normalized unit: Intensity; Annotation method: MSMS-Public_all-neg-VS19_1	False	False	104	0	0	0.97	-1	-1	-1	-1	-1	0.97	829.19	Plasma_008_neg_022	242.08051:894 243.08517:0 244.08984:0	null	0	0	0	0	0	0	1214	156	21	490	0	154	302	2142
79	0.698	215.033	0.70/215.0331	no MS2: 5-Methoxypsoralen	[M-H]-	null	0.91	False	7.267	215.035	C12H8O4	5-methoxypsoralens	BGEBZHIAGXMEMV-UHFFFAOYSA-N	O=C1OC=2C=C3OC=CC3=C(OC)C2C=C1	530	False	True	False	Normalized unit: Intensity; Annotation method: MSMS-Public_all-neg-VS19_1	False	False	79	0	0	1	-1	-1	-1	-1	-1	1	47106.8	QC_4-2_neg_035	215.03490:48072 216.03956:3417 217.04423:0	null	0	0	0	0	0	0	156456	138101	139093	150115	141640	137515	132322	123318
81	0.698	217.03	0.70/217.0304	no MS2: 4,4`-Thiodiphenol	[M-H]-	null	0.91	False	9.989	217.033	C12H10O2S	Diarylthioethers	VWGKEVWFBOUAND-UHFFFAOYSA-N	OC1=CC=C(SC2=CC=C(O)C=C2)C=C1	530	False	True	False	Normalized unit: Intensity; Annotation method: MSMS-Public_all-neg-VS19_1	False	False	81	0	0	1	-1	-1	-1	-1	-1	1	16520.8	Plasma_025_neg_047	217.03290:17592 218.03757:1139 219.04223:286	null	0	0	0	0	0	0	54733	48268	48784	52558	49971	48401	45995	43248
83	0.7	217.114	0.70/217.1136	no MS2: CEL - carboxyethyl lysine	[M-H]-	null	0.06	False	-1	217.119	C9H18N2O4	Alanine and derivatives	XCYPSOHOIAZISD-MLWJPKLSSA-N	CC(C(=O)O)NCCCCC(C(=O)O)N	530	False	True	False	Normalized unit: Intensity; Annotation method: MSMS-Public_all-neg-VS19_1	False	False	83	0	0	0.92	-1	-1	-1	-1	-1	0.92	946.89	QC_4-3_neg_058	217.12340:1216 218.12807:0 219.13273:0	null	0	0	0	0	0	0	398	342	397	297	409	231	365	268
312	0.701	366.113	0.70/366.1133	Unknown	[M-H]-	null	0.88	False	null	null	null	null	null	null	999	False	False	False	Normalized unit: Intensity	False	False	312	0	0	null	null	null	null	null	null	null	2270.43	Plasma_025_neg_047	366.11331:3543 367.11798:14913 368.12265:2194	null	0	0	0	0	0	0	5172	6362	5323	5305	2856	3014	4006	4456
313	0.701	367.11	0.70/367.1103	no MS2: Feruloyl quinic acid (isomer of 886, 887); PlaSMA ID-888	[M-H]-	null	0.91	False	3.98	367.105	C17H20O9	Quinic acid and derivatives	RAGZUCNPTLULOL-UHFFFAOYNA-N	O=C(OC1CC(O)(C(=O)O)CC(O)C1(O))C=CC=2C=CC(O)=C(OC)C=2	530	False	True	False	Normalized unit: Intensity; Annotation method: MSMS-Public_all-neg-VS19_1	False	False	313	0	0	1	-1	-1	-1	-1	-1	1	5000.74	QC_1-1_neg_009	367.10559:8652 368.11026:1295 369.11493:436	null	0	0	0	0	0	0	22618	27465	22589	23211	12406	7750	17520	19143
275	0.71	343.097	0.71/343.0966	no MS2: NCGC00381184-01_C15H20O9_	[M-H]-	null	0.09	False	-1	343.103	C15H20O9	Phenolic glycosides	APQFDHZCDLNMLA-APACUCGBSA-N	OC[C@H]1O[C@@H](OC2=C(CCC(O)=O)C=CC=C2O)[C@H](O)[C@@H](O)[C@@H]1O	530	False	True	False	Normalized unit: Intensity; Annotation method: MSMS-Public_all-neg-VS19_1	False	False	275	0	0	0.99	-1	-1	-1	-1	-1	0.99	795.92	Plasma_046_neg_078	343.10199:855 344.10666:0 345.11133:0	null	0	0	0	0	0	0	330	387	597	120	2253	753	698	25
44	0.71	174.091	0.71/174.0912	no MS2: Citrulline	[M-H]-	null	0.24	False	10.599	174.088	C6H13N3O3	L-alpha-amino acids	RHGKLRLOHDJJDR-UHFFFAOYSA-N	C(CC(C(=O)O)N)CNC(=O)N	530	False	True	False	Normalized unit: Intensity; Annotation method: MSMS-Public_all-neg-VS19_1	False	False	44	0	0	1	-1	-1	-1	-1	-1	1	1007.21	Plasma_001_neg_014	174.08859:1101 175.09326:0 176.09793:0	null	0	0	0	0	0	0	1976	2100	1780	1427	1665	1934	2082	1006
123	0.71	257.059	0.71/257.0592	no MS2: Thalidomide	[M-H]-	null	0.74	False	16.757	257.057	C13H10N2O4	Phthalimides	UEJJHQNACJXSKW-UHFFFAOYSA-N	O=C1N(C2CCC(=O)NC2=O)C(=O)C2=CC=CC=C12	530	False	True	False	Normalized unit: Intensity; Annotation method: MSMS-Public_all-neg-VS19_1	False	False	123	0	0	1	-1	-1	-1	-1	-1	1	2446.45	Plasma_014_neg_029	257.05670:2054 258.06137:202 259.06604:0	null	0	0	0	0	0	0	6196	0	3260	8272	10113	8718	1611	307
28	0.71	146.048	0.71/146.0483	no MS2: N-ACETYL-DL-SERINE	[M-H]-	null	0.91	False	5.642	146.046	C5H9NO4	N-acyl-L-alpha-amino acids	JJIHLJJYMXLCOY-UHFFFAOYSA-N	CC(=O)NC(CO)C(=O)O	530	False	True	False	Normalized unit: Intensity; Annotation method: MSMS-Public_all-neg-VS19_1	False	False	28	0	0	1	-1	-1	-1	-1	-1	1	155.86	QC_4-1_neg_012	146.04601:1415 147.05067:0 148.05534:0	null	0	0	0	0	0	0	4072	3078	3361	3612	2040	2176	3515	2766
32	0.712	155.047	0.71/155.0466	no MS2: 5,5-Dimethylbarbituric acid	[M-H]-	null	0.03	False	17.343	155.046	C6H8N2O3	Barbituric acid derivatives	LAOZSCRCYVBSJA-UHFFFAOYSA-N	CC1(C)C(=O)NC(=O)NC1=O	530	False	True	False	Normalized unit: Intensity; Annotation method: MSMS-Public_all-neg-VS19_1	False	False	32	0	0	1	-1	-1	-1	-1	-1	1	1085.97	Plasma_005_neg_018	155.04660:1244 156.05127:0 157.05594:0	null	0	0	0	0	0	0	440	149	207	42	2148	445	474	0
131	0.713	259.057	0.71/259.0566	no MS2: 2,3,4'-Trihydroxy-4-Methoxybenzophenone	[M-H]-	null	0.22	False	3.197	259.061	C14H12O5	Benzophenones	YYQLEVUVEAKBKB-UHFFFAOYSA-N	O=C(C1=CC=C(O)C=C1)C2=CC=C(OC)C(O)=C2O	530	False	True	False	Normalized unit: Intensity; Annotation method: MSMS-Public_all-neg-VS19_1	False	False	131	0	0	0.94	-1	-1	-1	-1	-1	0.94	1127.52	QC_4-4_neg_083	259.05780:1136 260.06247:0 261.06714:0	null	0	0	0	0	0	0	597	0	1889	2948	3712	1690	296	60
334	0.713	381.094	0.71/381.0936	no MS2: 9-[[3-methyl-3-[(4-methyl-5-oxo-2H-furan-2-yl)methyl]oxiran-2-yl]methoxy]furo[3,2-g]chromen-7-one	[M-H]-	null	0.12	False	-1	381.098	C21H18O7	Psoralens	CISFAPDYRQPRCZ-UHFFFAOYSA-N	O=C1OC2=C(OCC3OC3(C)CC4OC(=O)C(=C4)C)C=5OC=CC5C=C2C=C1	530	False	True	False	Normalized unit: Intensity; Annotation method: MSMS-Public_all-neg-VS19_1	False	False	334	0	0	0.91	-1	-1	-1	-1	-1	0.91	798.92	Plasma_046_neg_078	381.09360:1069 382.09827:0 383.10293:4937	null	0	0	0	0	0	0	378	258	384	14	92	450	752	588
293	0.714	352.096	0.71/352.0955	Unknown	[M-H]-	null	0.65	False	null	null	null	null	null	null	999	False	False	False	Normalized unit: Intensity	False	False	293	0	0	null	null	null	null	null	null	null	1146.16	Plasma_008_neg_022	352.09549:2401 353.10016:9451 354.10483:0	null	0	0	0	0	0	0	1230	1397	1126	1083	226	974	1504	3942
129	0.714	258.986	0.71/258.9858	Unknown	[M-H]-	null	0.91	False	null	null	null	null	null	null	999	False	False	False	Normalized unit: Intensity	False	False	129	0	0	null	null	null	null	null	null	null	2124.17	Plasma_023_neg_045	258.98581:3288 259.99048:251 260.99514:0	null	0	0	0	0	0	0	3081	6448	5966	5906	5235	4824	5304	4707
134	0.714	260.983	0.71/260.9829	Unknown	[M-H]-	null	0.91	False	null	null	null	null	null	null	999	False	False	False	Normalized unit: Intensity	False	False	134	0	0	null	null	null	null	null	null	null	2247.5	Plasma_023_neg_045	260.98291:3590 261.98758:285 262.99225:0	null	0	0	0	0	0	0	5935	4066	6200	5977	5301	4934	3572	4856
153	0.714	277.037	0.71/277.0367	no MS2: Exifone	[M-H]-	null	0.82	False	11.414	277.035	C13H10O7	Benzophenones	XEDWWPGWIXPVRQ-UHFFFAOYSA-N	OC1=CC=C(C(=O)C2=CC(O)=C(O)C(O)=C2)C(O)=C1O	530	False	True	False	Normalized unit: Intensity; Annotation method: MSMS-Public_all-neg-VS19_1	False	False	153	0	0	1	-1	-1	-1	-1	-1	1	434.71	Plasma_012_neg_027	277.03540:2534 278.04007:180 279.04474:0	null	0	0	0	0	0	0	4889	3124	2299	3495	2211	1838	3597	3457
296	0.714	353.091	0.71/353.0912	no MS2: Chlorogenic acid	[M-H]-	null	0.91	False	7.112	353.088	C16H18O9	Quinic acids and derivatives	CWVRJTMFETXNAD-JUHZACGLSA-N	O=C(O)C1(O)CC(O)C(O)C(OC(=O)C=CC2=CC=C(O)C(O)=C2)C1	530	False	True	False	Normalized unit: Intensity; Annotation method: MSMS-Public_all-neg-VS19_1	False	False	296	0	0	0.98	-1	-1	-1	-1	-1	0.98	3883.14	QC_1-1_neg_009	353.09000:3756 354.09466:519 355.09933:202	null	0	0	0	0	0	0	5338	6605	5044	4666	1654	4667	6295	16199
0	0.715	78.9198	0.72/78.9198	Unknown	[M-H]-	null	0.1	False	null	null	null	null	null	null	999	False	False	False	Normalized unit: Intensity	False	False	0	0	0	null	null	null	null	null	null	null	907.65	Plasma_023_neg_045	78.91980:1099 79.92447:0 80.92914:0	null	0	0	0	0	0	0	1099	1061	1717	1326	1513	1523	707	1059
38	0.715	165.041	0.72/165.0411	no MS2: 3-Methylxanthine	[M-H]-	null	0.91	False	-1	165.042	C6H6N4O2	Xanthines	GMSNIKWWOQHZGF-UHFFFAOYSA-N	CN1C2=C(C(=O)NC1=O)NC=N2	530	False	True	False	Normalized unit: Intensity; Annotation method: MSMS-Public_all-neg-VS19_1	False	False	38	0	0	1	-1	-1	-1	-1	-1	1	3089.37	QC_2-2_neg_033	165.04170:3446 166.04637:198 167.05104:0	null	0	0	0	0	0	0	6904	6494	5442	6710	2393	5416	7943	17250
1	0.716	80.9178	0.72/80.9178	Unknown	[M-H]-	null	0.24	False	null	null	null	null	null	null	999	False	False	False	Normalized unit: Intensity	False	False	1	0	0	null	null	null	null	null	null	null	909.71	Plasma_023_neg_045	80.91780:1131 81.92247:0 82.92714:0	null	0	0	0	0	0	0	1839	1989	1874	1198	444	1589	1172	384
335	0.716	382.109	0.72/382.1091	no MS2: 2-[[1-(4-nitrobenzoyl)pyrrolidine-2-carbonyl]amino]benzoic acid	[M-H]-	null	0.72	False	4.749	382.104	C19H17N3O6	Acylaminobenzoic acid and derivatives	IXQCQOLLSMIABK-UHFFFAOYSA-N	O=C(O)C=1C=CC=CC1N=C(O)C2N(C(=O)C3=CC=C(C=C3)N(=O)=O)CCC2	530	False	True	False	Normalized unit: Intensity; Annotation method: MSMS-Public_all-neg-VS19_1	False	False	335	0	0	1	-1	-1	-1	-1	-1	1	1037.96	Plasma_001_neg_014	382.10431:946 383.10898:3663 384.11364:504	null	0	0	0	0	0	0	1705	1306	1530	966	991	862	2222	1733
336	0.716	383.109	0.72/383.1086	no MS2: NCGC00380241-01!5-methyl-4-[(2S,3R,4S,5S,6R)-3,4,5-trihydroxy-6-(hydroxymethyl)oxan-2-yl]oxychromen-2-one	[M+HCOO]-	null	0.91	False	-1	383.098	C16H18O8	Coumarin glycosides	DXBGTODWNFZHCD-LMXXTMHSSA-N	CC1=C2C(O[C@@H]3O[C@H](CO)[C@@H](O)[C@H](O)[C@H]3O)=CC(=O)OC2=CC=C1	530	False	True	False	Normalized unit: Intensity; Annotation method: MSMS-Public_all-neg-VS19_1	False	False	336	0	0	0.98	-1	-1	-1	-1	-1	0.98	737.83	QC_1-1_neg_009	383.10031:3166 384.10498:488 385.10965:0	null	0	0	0	0	0	0	7174	5580	6241	4247	4405	3832	8773	6964
60	0.717	193.04	0.72/193.0397	no MS2: Glucuronic acid	[M-H]-	null	0.01	False	8.752	193.035	C6H10O7	Glucuronic acid derivatives	IAJILQKETJEXLJ-QTBDOELSSA-N	O=CC(O)C(O)C(O)C(O)C(=O)O	530	False	True	False	Normalized unit: Intensity; Annotation method: MSMS-Public_all-neg-VS19_1	False	False	60	0	0	0.91	-1	-1	-1	-1	-1	0.91	1350.75	Plasma_043_neg_074	193.03970:1562 194.04437:0 195.04904:5401	null	0	0	0	0	0	0	370	202	671	164	600	287	652	431
63	0.718	195.052	0.72/195.0518	no MS2: 1,7-Dimethyluric acid	[M-H]-	null	0.91	False	4.206	195.052	C7H8N4O3	Xanthines	NOFNCLGCUJJPKU-UHFFFAOYSA-N	O=C1C2=C(N=C(O)N1C)N=C(O)N2C	530	False	True	False	Normalized unit: Intensity; Annotation method: MSMS-Public_all-neg-VS19_1	False	False	63	0	0	1	-1	-1	-1	-1	-1	1	4106.26	Plasma_014_neg_029	195.05240:3362 196.05707:274 197.06173:0	null	0	0	0	0	0	0	12491	8436	8775	8912	9181	7463	15131	9922
200	0.719	307.116	0.72/307.1163	no MS2: 5,13,15-trihydroxy-9-methyl-10-oxabicyclo[10.4.0]hexadeca-1(12),13,15-triene-3,11-dione	[M-H]-	null	0.18	False	3.562	307.119	C16H20O6	Macrolides and analogues	TXFYYWHRTDECTR-UHFFFAOYSA-N	O=C1OC(C)CCCC(O)CC(=O)CC=2C=C(O)C=C(O)C12	530	False	True	False	Normalized unit: Intensity; Annotation method: MSMS-Public_all-neg-VS19_1	False	False	200	0	0	1	-1	-1	-1	-1	-1	1	828.85	Plasma_029_neg_052	307.11859:935 308.12326:0 309.12793:0	null	0	0	0	0	0	0	2308	1445	1387	886	489	895	2168	1078
315	0.72	369.091	0.72/369.0915	no MS2: Parecoxib	[M-H]-	null	0.06	False	0.982	369.091	C19H18N2O4S	Benzenesulfonamides	TZRHLKRLEZJVIJ-UHFFFAOYSA-N	O=S(=O)(N=C(O)CC)C1=CC=C(C=C1)C=2C(=NOC2C)C=3C=CC=CC3	530	False	True	False	Normalized unit: Intensity; Annotation method: MSMS-Public_all-neg-VS19_1	False	False	315	0	0	1	-1	-1	-1	-1	-1	1	464.86	Plasma_045_neg_076	369.09149:1075 370.09616:0 371.10083:0	null	0	0	0	0	0	0	173	157	117	0	0	19	745	1444
330	0.722	379.087	0.72/379.0868	no MS2: HippuricAcid	[M+Cl]-	null	0.51	False	-1	379.091	C9H9NO3	Hippuric acids	QIAFMBKCNZACKA-UHFFFAOYSA-N	C1=CC=C(C=C1)C(=O)NCC(=O)O	530	False	True	False	Normalized unit: Intensity; Annotation method: MSMS-Public_all-neg-VS19_1	False	False	330	0	0	1	-1	-1	-1	-1	-1	1	63.84	Plasma_046_neg_078	379.09119:3522 380.09585:647 381.10052:873	null	0	0	0	56	0	0	258	2475	113	501	871	10148	10906	5627
325	0.725	377.089	0.73/377.0893	no MS2: NCGC00169010-02_C18H18O9_Naphtho[2,3-c]furan-1(3H)-one, 8-(beta-D-glucopyranosyloxy)-9-hydroxy-	[M-H]-	null	0.85	False	-1	377.088	C18H18O9	Phenolic glycosides	SGQJDTLFQCDZGS-UQEKQVNISA-N	OC[C@H]1O[C@@H](OC2=C3C(=C4C(=O)OCC4=CC3=CC=C2)O)[C@H](O)[C@@H](O)[C@@H]1O	530	False	True	False	Normalized unit: Intensity; Annotation method: MSMS-Public_all-neg-VS19_1	False	False	325	0	0	1	-1	-1	-1	-1	-1	1	3237.09	Plasma_012_neg_027	377.08771:12491 378.09238:1830 379.09704:0	null	449	247	207	1057	471	496	5729	6981	4216	3273	11081	27711	30096	15524
388	0.726	421.041	0.73/421.0411	Unknown	[M-H]-	null	0.03	False	null	null	null	null	null	null	999	False	False	False	Normalized unit: Intensity	False	False	388	0	0	null	null	null	null	null	null	null	44.8	Plasma_020_neg_041	421.04111:1864 422.04577:0 423.05044:0	null	0	0	0	0	0	0	20	251	32	0	19	1961	1477	356
390	0.726	423.039	0.73/423.0393	no MS2: THIAMINE PYROPHOSPHATE	[M-H]-	null	0.22	False	-1	423.03	C12H18N4O7P2S	Thiamine phosphates	AYEKOFBPNLCAJY-UHFFFAOYSA-N	CC1=C(SC=[N+]1CC2=CN=C(N=C2N)C)CCO[P@@](O)(OP([O-])(O)=O)=O	530	False	True	False	Normalized unit: Intensity; Annotation method: MSMS-Public_all-neg-VS19_1	False	False	390	0	0	0.91	-1	-1	-1	-1	-1	0.91	31.02	Plasma_006_neg_020	423.03430:914 424.03897:0 425.04364:0	null	0	0	0	0	0	0	38	251	31	20	369	1932	985	121
157	0.726	280.109	0.73/280.1089	no MS2: 1-METHYLADENOSINE	[M-H]-	null	0.04	False	1.318	280.105	C11H15N5O4	Purine nucleosides	GFYLSDSUCHVORB-IOSLPCCCSA-N	CN1C=NC2=C(C1=N)N=CN2[C@H]3[C@@H]([C@@H]([C@H](O3)CO)O)O	530	False	True	False	Normalized unit: Intensity; Annotation method: MSMS-Public_all-neg-VS19_1	False	False	157	0	0	1	-1	-1	-1	-1	-1	1	945.27	Plasma_013_neg_028	280.10550:929 281.11017:0 282.11483:0	null	0	0	0	0	0	0	1387	376	344	1024	114	622	375	83
193	0.726	301.009	0.73/301.0093	no MS2: FT-thioether; C8H9F7O2S	[M-H]-	null	0.47	False	-1	301.014	C8H9F7O2S	Halogenated fatty acids	MHRKBMQIXRUREA-UHFFFAOYSA-N	O=C(O)CCSCCC(F)(F)C(F)(F)C(F)(F)F	530	False	True	False	Normalized unit: Intensity; Annotation method: MSMS-Public_all-neg-VS19_1	False	False	193	0	0	0.97	-1	-1	-1	-1	-1	0.97	950.74	Plasma_038_neg_068	301.01151:964 302.01617:314 303.02084:0	null	0	0	0	0	0	0	908	0	1067	1390	1995	1155	556	32
47	0.726	179.056	0.73/179.0564	no MS2: Theophylline	[M-H]-	null	0.65	False	2.169	179.057	C7H8N4O2	Xanthines	ZFXYFBGIUFBOJW-UHFFFAOYSA-N	CN1C2=C(NC=N2)C(=O)N(C)C1=O	530	False	True	False	Normalized unit: Intensity; Annotation method: MSMS-Public_all-neg-VS19_1	False	False	47	0	0	1	-1	-1	-1	-1	-1	1	2020.75	Plasma_019_neg_040	179.05740:1819 180.06207:0 181.06674:0	null	0	0	0	0	0	0	11167	4216	4485	959	4831	8173	2764	5738
197	0.727	303.008	0.73/303.0084	Unknown	[M-H]-	null	0.49	False	null	null	null	null	null	null	999	False	False	False	Normalized unit: Intensity	False	False	197	0	0	null	null	null	null	null	null	null	958.11	Plasma_034_neg_063	303.00839:1603 304.01306:0 305.01773:0	null	0	0	0	0	0	0	974	0	1004	1390	1925	1053	326	15
86	0.73	225.066	0.73/225.0658	no MS2: Flurenol	[M+CH3COO]-	null	0.04	False	6.3	225.056	C14H10O3	Fluorenes	GXAMYUGOODKVRM-UHFFFAOYSA-N	O=C(O)C3(O)c1ccccc1c2c3cccc2	530	False	True	False	Normalized unit: Intensity; Annotation method: MSMS-Public_all-neg-VS19_1	False	False	86	0	0	0.79	-1	-1	-1	-1	-1	0.79	825.15	Plasma_004_neg_017	225.06250:949 226.06717:0 227.07184:0	null	0	0	0	0	0	0	1858	688	1389	2723	1204	1089	1258	2217
121	0.733	256.063	0.73/256.0627	no MS2: Metolachlor-TP CGA 368208	[M-H]-	null	0.03	False	3.94	256.065	C11H15NO4S	Anilides	QPVPJECIHVSBLZ-UHFFFAOYSA-N	CCC1=C(NC(=O)CS(O)(=O)=O)C(C)=CC=C1	530	False	True	False	Normalized unit: Intensity; Annotation method: MSMS-Public_all-neg-VS19_1	False	False	121	0	0	0.98	-1	-1	-1	-1	-1	0.98	1477.06	Plasma_017_neg_038	256.06271:1692 257.06738:2268 258.07205:0	null	0	0	0	0	0	0	337	42	295	186	914	3225	990	560
196	0.733	302.013	0.73/302.0130	Unknown	[M-H]-	null	0.03	False	null	null	null	null	null	null	999	False	False	False	Normalized unit: Intensity	False	False	193	1	0	null	null	null	null	null	null	null	907.97	Plasma_040_neg_070	302.01300:1046 303.01767:607 304.02234:0	null	0	0	0	0	0	0	283	240	461	304	581	1108	928	491
233	0.735	319.055	0.74/319.0549	no MS2: Hydroxyhaemoventosine	[M-H]-	null	0.28	False	-1	319.046	C15H12O8	Isochromanequinones	GCBHOICQSSPFDL-DPVSGNNYSA-N	OC1=C2C(C(O)[C@H](C)OC2=O)=C(O)C3=C1C(C=C(OC)C3=O)=O	530	False	True	False	Normalized unit: Intensity; Annotation method: MSMS-Public_all-neg-VS19_1	False	False	233	0	0	0.8	-1	-1	-1	-1	-1	0.8	1064.02	Plasma_016_neg_037	319.05261:1113 320.05728:0 321.06195:0	null	0	0	0	0	0	0	1882	0	1334	989	1885	860	1500	72
19	0.735	135.032	0.74/135.0317	no MS2: HYPOXANTHINE	[M-H]-	null	0.03	False	2.449	135.031	C5H4N4O	Hypoxanthines	FDGQSTZJBFJUBT-UHFFFAOYSA-N	C1=NC2=C(N1)C(=O)N=CN2	530	False	True	False	Normalized unit: Intensity; Annotation method: MSMS-Public_all-neg-VS19_1	False	False	19	0	0	1	-1	-1	-1	-1	-1	1	885.41	Plasma_030_neg_053	135.03169:901 136.03636:0 137.04103:0	null	0	0	0	0	0	0	1941	1768	774	1433	1709	1247	699	1821
389	0.737	421.068	0.74/421.0678	no MS2: Trehalose-6-phosphate	[M+K-2H]-	null	0.4	False	9.708	421.075	C12H23O14P	Disaccharide phosphates	LABSPYBHMPDTEL-LIZSDCNHSA-N	O=P(O)(O)OCC1OC(OC2OC(CO)C(O)C(O)C2O)C(O)C(O)C1O	530	False	True	False	Normalized unit: Intensity; Annotation method: MSMS-Public_all-neg-VS19_1	False	False	389	0	0	1	-1	-1	-1	-1	-1	1	41.55	QC_2-4_neg_081	421.07541:1159 422.08008:0 423.08474:0	null	0	0	0	0	0	0	98	0	0	0	42	627	4455	1744
378	0.738	405.086	0.74/405.0861	Unknown	[M-H]-	null	0.01	False	null	null	null	null	null	null	999	False	False	False	Normalized unit: Intensity	False	False	378	0	0	null	null	null	null	null	null	null	18.46	Plasma_009_neg_023	405.08609:883 406.09076:0 407.09543:0	null	0	0	0	0	0	0	614	386	435	77	0	0	825	169
408	0.74	439.086	0.74/439.0857	Unknown	[M-H]-	null	0.74	False	null	null	null	null	null	null	999	False	False	False	Normalized unit: Intensity	False	False	408	0	0	null	null	null	null	null	null	null	63.35	Plasma_013_neg_028	439.08569:4226 440.09036:642 441.09503:272	null	0	0	0	0	0	0	2018	2750	1710	844	2270	3288	9395	4642
206	0.744	308.103	0.74/308.1034	no MS2: N-ACETYLNEURAMINATE	[M-H]-	null	0.81	False	6.607	308.099	C11H19NO9	N-acylneuraminic acids	SQVRNKJHWKZAKO-LUWBGTNYSA-N	CC(=O)N[C@@H]1[C@H](CC(O[C@H]1[C@@H]([C@@H](CO)O)O)(C(=O)O)O)O	530	False	True	False	Normalized unit: Intensity; Annotation method: MSMS-Public_all-neg-VS19_1	False	False	206	0	0	1	-1	-1	-1	-1	-1	1	1139.18	QC_3-1_neg_011	308.09869:997 309.10336:0 310.10803:0	null	0	0	0	0	0	0	3861	3227	3094	3055	1785	1497	2579	1269
33	0.746	157.04	0.75/157.0400	no MS2: ALLANTOIN	[M-H]-	null	0.82	False	2.311	157.037	C4H6N4O3	Imidazoles	POJWUDADGALRAB-UHFFFAOYSA-N	C1(C(=O)NC(=O)N1)NC(=O)N	530	False	True	False	Normalized unit: Intensity; Annotation method: MSMS-Public_all-neg-VS19_1	False	False	33	0	0	1	-1	-1	-1	-1	-1	1	1628.47	QC_2-1_neg_010	157.03670:1686 158.04137:0 159.04603:0	null	0	0	0	0	0	0	2129	1646	2378	1333	2078	2858	1388	2207
228	0.749	315.042	0.75/315.0422	no MS2: Isorhamnetin; PlaSMA ID-664	[M-H]-	null	0.81	False	6.14	315.051	C16H12O7	Flavonol O-glycosides	IZQSVPBOUDKVDZ-UHFFFAOYSA-N	O=C1C(O)=C(OC2=CC(O)=CC(O)=C12)C=3C=CC(O)=C(OC)C=3	530	False	True	False	Normalized unit: Intensity; Annotation method: MSMS-Public_all-neg-VS19_1	False	False	228	0	0	0.97	-1	-1	-1	-1	-1	0.97	1161.35	Plasma_040_neg_070	315.04849:1314 316.05316:0 317.05783:0	null	0	0	0	0	0	0	3590	7371	4538	3041	3831	3624	2833	2596
111	0.755	245.058	0.76/245.0577	Unknown	[M-H]-	null	0.04	False	null	null	null	null	null	null	999	False	False	False	Normalized unit: Intensity	False	False	111	0	0	null	null	null	null	null	null	null	992.08	Plasma_038_neg_068	245.05769:1225 246.06236:0 247.06703:0	null	0	0	0	0	0	0	821	200	299	1003	920	17	0	0
368	0.757	401.959	0.76/401.9591	Unknown	[M-H]-	null	0.22	False	null	null	null	null	null	null	999	False	False	False	Normalized unit: Intensity	False	False	368	0	0	null	null	null	null	null	null	null	872.39	Plasma_027_neg_050	401.95911:997 402.96377:0 403.96844:0	null	0	0	0	0	0	0	1180	1386	624	1770	1485	1777	1376	1236
379	0.76	406.071	0.76/406.0712	no MS2: PFSM-ammonio; [C10H20F5N2O5S2]+	[M-H]-	null	0.21	False	-1	406.066	C10H20F5N2O5S2	Organosulfonic acids and derivatives	GDVFZOZBFJNYEM-UHFFFAOYSA-O	O=S(=O)(O)CCC[N+](C)(C)CCCNS(=O)(=O)C(F)(F)C(F)(F)F	530	False	True	False	Normalized unit: Intensity; Annotation method: MSMS-Public_all-neg-VS19_1	False	False	379	0	0	1	-1	-1	-1	-1	-1	1	1305.58	Plasma_003_neg_016	406.06659:1113 407.07126:0 408.07592:0	null	0	0	0	0	0	0	806	2564	2372	305	752	33	3191	1045
588	0.761	561.931	0.76/561.9311	Unknown	[M-H]-	null	0.24	False	null	null	null	null	null	null	999	False	False	False	Normalized unit: Intensity	False	False	588	0	0	null	null	null	null	null	null	null	1006.85	Plasma_025_neg_047	561.93109:1602 562.93576:245 563.94043:0	null	0	0	0	0	0	0	1813	1061	791	1448	1130	879	1964	2300
445	0.766	463.954	0.77/463.9543	Unknown	[M-H]-	null	0.9	False	null	null	null	null	null	null	999	False	False	False	Normalized unit: Intensity	False	False	445	0	0	null	null	null	null	null	null	null	1994.84	Plasma_025_neg_047	463.95432:2490 464.95898:435 465.96365:0	null	0	0	0	0	0	0	4338	5386	4620	5051	5129	3895	6014	5041
618	0.767	573.044	0.77/573.0438	no MS2: DihydroFerulic_Acid4O_Sulfate	[2M-2H+Na]-	null	0.62	False	-1	573.035	C10H12O7S	Phenylsulfates	UMCDODPBPQMWQP-UHFFFAOYSA-N	COC1=C(OS(O)(=O)=O)C=CC(CCC(O)=O)=C1	530	False	True	False	Normalized unit: Intensity; Annotation method: MSMS-Public_all-neg-VS19_1	False	False	618	0	0	1	-1	-1	-1	-1	-1	1	247.49	Plasma_009_neg_023	573.03558:867 574.04025:0 575.04492:0	null	0	0	0	0	0	0	3572	1688	2178	1788	452	444	284	521
730	0.777	710.99	0.78/710.9903	Unknown	[M-H]-	null	0.16	False	null	null	null	null	null	null	999	False	False	False	Normalized unit: Intensity	False	False	730	0	0	null	null	null	null	null	null	null	1433.37	Plasma_027_neg_050	710.99030:1511 711.99496:443 712.99963:0	null	0	0	0	0	0	0	472	343	776	2401	1132	4969	505	644
305	0.787	356.998	0.79/356.9977	no MS2: PFCA-H; C8H5F11O3	[M-H]-	null	0.01	False	-1	356.999	C8H5F11O3	Carboxylic acids	JMYMIPCNDZAAOL-UHFFFAOYSA-N	O=C(O)COCC(F)(F)C(F)(F)C(F)(F)C(F)(F)C(F)(F)F	530	False	True	False	Normalized unit: Intensity; Annotation method: MSMS-Public_all-neg-VS19_1	False	False	305	0	0	0.99	-1	-1	-1	-1	-1	0.99	79.92	Plasma_020_neg_041	356.99771:2774 358.00238:366 359.00705:0	null	0	0	0	0	0	0	866	796	905	598	373	294	532	540
728	0.788	700.005	0.79/700.0052	Unknown	[M-H]-	null	0.03	False	null	null	null	null	null	null	999	False	False	False	Normalized unit: Intensity	False	False	728	0	0	null	null	null	null	null	null	null	1409.25	Plasma_020_neg_041	700.00519:1861 701.00986:668 702.01452:0	null	0	0	0	0	0	0	366	486	681	159	235	392	674	702
719	0.788	687.009	0.79/687.0090	Unknown	[M-H]-	null	0.35	False	null	null	null	null	null	null	999	False	False	False	Normalized unit: Intensity	False	False	719	0	0	null	null	null	null	null	null	null	376.59	Plasma_026_neg_049	687.00897:1628 688.01364:468 689.01831:0	null	0	0	0	0	0	0	3985	3995	3760	4365	5024	3831	5459	4586
722	0.789	689.005	0.79/689.0052	Unknown	[M-H]-	null	0.91	False	null	null	null	null	null	null	999	False	False	False	Normalized unit: Intensity	False	False	722	0	0	null	null	null	null	null	null	null	6964.33	Plasma_026_neg_049	689.00519:10733 690.00986:3092 691.01452:978	null	0	0	0	0	0	0	15041	42445	37552	44542	40597	42918	43110	41336
729	0.79	702.003	0.79/702.0032	Unknown	[M-H]-	null	0.01	False	null	null	null	null	null	null	999	False	False	False	Normalized unit: Intensity	False	False	729	0	0	null	null	null	null	null	null	null	1205	Plasma_020_neg_041	702.00317:1295 703.00784:191 704.01251:0	null	0	0	0	0	0	0	94	131	68	50	47	24	104	88
301	0.79	354.998	0.79/354.9981	no MS2: Rhodocladonic acid	[M+K-2H]-	null	0.22	False	-1	354.986	C15H10O8	Naphthofurans	XKWWCTISHMFHJB-UHFFFAOYSA-N	CC(=O)c1c(c2c(o1)cc1c(c2O)C(=O)C(=O)C(=C1O)OC)O	530	False	True	False	Normalized unit: Intensity; Annotation method: MSMS-Public_all-neg-VS19_1	False	False	301	0	0	0.65	-1	-1	-1	-1	-1	0.65	787.96	Plasma_012_neg_027	354.99539:917 356.00006:0 357.00473:612	null	0	0	0	0	0	0	1516	2650	2223	1251	560	704	940	844
727	0.79	698.006	0.79/698.0059	Unknown	[M-H]-	null	0.19	False	null	null	null	null	null	null	999	False	False	False	Normalized unit: Intensity	False	False	727	0	0	null	null	null	null	null	null	null	1105.21	Plasma_020_neg_041	698.00592:2821 699.01059:777 700.01526:0	null	0	0	0	0	0	0	1410	917	1548	1230	595	486	1522	1729
745	0.79	786.984	0.79/786.9840	no MS2: FT-thioether; C17H7F27O2S	[M-H]-	null	0.78	False	-1	786.966	C17H7F27O2S	Halogenated fatty acids	LWPNFXDCJARAAR-UHFFFAOYSA-N	O=C(O)CSCCC(F)(F)C(F)(F)C(F)(F)C(F)(F)C(F)(F)C(F)(F)C(F)(F)C(F)(F)C(F)(F)C(F)(F)C(F)(F)C(F)(F)C(F)(F)F	530	False	True	False	Normalized unit: Intensity; Annotation method: MSMS-Public_all-neg-VS19_1	False	False	745	0	0	0.91	-1	-1	-1	-1	-1	0.91	1519.87	QC_2-1_neg_010	786.97333:1497 787.97800:438 788.98266:0	null	0	0	0	0	0	0	7187	2485	1626	6267	6140	4980	2994	8131
[truncated: 411 more rows]
[truncated: 61 more columns]

## Sheet: Remarks
Remarks to preprocessing
	No of features
Dataset has prior to clean-up	801
Peaks where QC/Blind < 5 deleted	28
[truncated: 3 more rows]

## Sheet: Data for PCA
		Sample_no	Type	Injection	Batch	0.56/386.9466	0.56/420.8955	0.56/678.8118	0.56/404.9209	0.56/402.9224	0.56/418.8960	0.56/434.8790	0.56/532.8812	0.56/548.8575	0.56/564.8375	0.56/808.7770	0.56/694.7916	0.56/304.9192	0.56/288.9379	0.57/272.9626	0.57/274.9602	0.58/616.8417	0.58/632.8277	0.58/502.8608	0.58/486.8893	0.58/570.8556	0.58/554.8696	0.58/356.9293	0.58/372.9064	0.58/158.9813	0.58/638.8350	0.58/424.9164	0.58/440.8953	0.58/622.8584	0.58/492.9048	0.58/508.8796	0.59/560.8925	0.59/576.8660	0.59/242.9470	0.59/226.9668	0.59/628.8797	0.59/644.8585	0.59/712.8428	0.59/294.9598	0.59/310.9316	0.59/362.9449	0.59/378.9192	0.59/430.9340	0.59/446.9131
[truncated: 62 more rows]
[truncated: 610 more columns]

[truncated: 1 more sheets: woOutlayers]
