# Supplementary material for: Obesity-like metabolic signatures in females: from birth to weaning in a mammalian model
Source: Research Square preprint supplement (doi:10.21203/rs.3.rs-7381399/v1), 2026-02-10
Supplement: Supplementary file 3 [file d3e2fcc6c3d01e0052089775.docx]

**Tables**

| **Table 1.** List of plasma metabolites differentiating among physiological stage in a mammalian model. | | | | | | | | |
| --- | --- | --- | --- | --- | --- | --- | --- | --- |
|  | | | **Parturition*** | | **Weaning*** | |  | |
| **RT-m/z** | **ION** | **Metabolite** | **X** | ±**SE**** | **X** | ±**SE** | **Fold***** | **P_value** |
| 3.01/184.0608 | [M+H]+ | 4-Pyridoxic acid | 230 | ±68 | 906 | ±66 | 0.254 | <0.0001 |
| 3.48/144.1025 | [M+H]+ | Proline betaine | 151 | ±127 | 1385 | ±124 | 0.109 | <0.0001 |
| 2.95/146.0816 | [M+H]+ | Allysine | 107 | ±110 | 1109 | ±107 | 0.096 | <0.0001 |
| 1.25/123.0558 | [M+H]+ | 2-acetylpyrazine | 429 | ±143 | 1841 | ±140 | 0.233 | <0.0001 |
| 11.36/591.4505 | [2M+Na]+ | LysoPC | 1505 | ±1710 | 14815 | ±1672 | 0.102 | <0.0001 |
| 7.93/476.2782 | [M+H]+ | LysoPE(18:3/0:0 | 1225 | ±426 | 4237 | ±416 | 0.289 | <0.0001 |
| 7.72/536.3353 | [M+NH4]+ | LysoPC | 5431 | ±1708 | 17444 | ±1671 | 0.311 | <0.0001 |
| 0.73/118.0866 | [M+H]+ | Betaine | 54036 | ±2204 | 41893 | ±2204 | 1.296 | 0.0003 |
| 8.55/301.2172 | [M+H]+ | Kaurane diterpenoid **** | 2712 | ±547 | 6483 | ±535 | 0.418 | <0.0001 |
| 0.72/279.1920 | [M+H]+ | alpha-CEHC | 31693 | ±1598 | 18947 | ±1563 | 1.673 | <0.0001 |
| 9.94/502.2802 | [M+H]+ | LysoPE(0:0/20:4) | 2028 | ±168 | 2485 | ±164 | 0.816 | 0.0583 |
| (*) Parturition and weaning: two different physiological stages of the rabbit does at 0 days after parturition and 28 days after parturition, respectively. (**) LS means ± Standard error (***)Fold change was calculated by dividing the mean intensity of the plasma metabolite at parturition by the mean intensity of the corresponding metabolite at weaning. (****) Ent-6,16-Kauradien-19-oic acid. | | | | | | | | |

| **Table 2.** List of plasma metabolites differentiating among growth genotype (GG) at parturition in a mammalian model. | | | | | | | | |
| --- | --- | --- | --- | --- | --- | --- | --- | --- |
|  | | | **LGR*** | | **HGR*** | |  | |
| **RT-m/z** | **ION** | **Metabolite** | **X** | ±**SE**** | **X** | ±**SE** | **Fold***** | **P_value** |
| 3.01/184.0608 | [M+H]+ | 4-Pyridoxic acid | 167 | ±92 | 283 | ±84 | 0.5901 | 0.3644 |
| 3.48/144.1025 | [M+H]+ | Proline betaine | 145 | ±121 | 156 | ±110 | 0.9295 | 0.9480 |
| 2.95/146.0816 | [M+H]+ | Allysine | 34 | ±95 | 168 | ±87 | 0.2024 | 0.3134 |
| 1.25/123.0558 | [M+H]+ | 2-acetylpyrazine | 313 | ±111 | 526 | ±101 | 0.5951 | 0.1728 |
| 11.36/591.4505 | [2M+Na]+ | LysoPC | 83 | ±1687 | 2690 | ±1540 | 0.0309 | 0.2673 |
| 7.93/476.2782 | [M+H]+ | LysoPE(18:3/0:0 | 1062 | ±385 | 1361 | ±351 | 0.7803 | 0.5713 |
| 7.72/536.3353 | [M+NH4]+ | LysoPC | 4699 | ±1613 | 6041 | ±1473 | 0.7779 | 0.5459 |
| 0.73/118.0866 | [M+H]+ | Betaine | 50192 | ±4106 | 57239 | ±3749 | 0.8769 | 0.2196 |
| 8.55/301.2172 | [M+H]+ | Kaurane diterpenoid **** | 3087 | ±548 | 2398 | ±500 | 1.2873 | 0.3643 |
| 0.72/279.1920 | [M+H]+ | alpha-CEHC | 31323 | ±3086 | 32002 | ±2817 | 0.9788 | 0.8724 |
| 9.94/502.2802 | [M+H]+ | LysoPE(0:0/20:4) | 1182 | ±153 | 2733 | ±139 | 0.4325 | <0.0001 |
| (*)LGR and HGR represent the two GG: low and high growth rate., respectively. (**) LS means ± Standard error (***)Fold change was calculated by dividing the mean intensity of the plasma metabolite in LGR by the mean intensity of the corresponding metabolite in HGR animals. (****) Ent-6,16-Kauradien-19-oic acid.. | | | | | | | | |

| **Table 3.** List of plasma metabolites differentiating among growth genotype (GG) at weaning in a mammalian model. | | | | | | | | |
| --- | --- | --- | --- | --- | --- | --- | --- | --- |
|  | | | **LGR*** | | **HGR*** | |  | |
| **RT-m/z** | **ION** | **Metabolite** | **X** | ±**SE**** | **X** | ±**SE** | **Fold***** | **P_value** |
| 3.01/184.0608 | [M+H]+ | 4-Pyridoxic acid | 835 | ±103 | 971 | ±98 | 0.8599 | 0.3487 |
| 3.48/144.1025 | [M+H]+ | Proline betaine | 1638 | ±218 | 1153 | ±209 | 1.4206 | 0.1225 |
| 2.95/146.0816 | [M+H]+ | Allysine | 1173 | ±201 | 1049 | ±193 | 1.1182 | 0.6604 |
| 1.25/123.0558 | [M+H]+ | 2-acetylpyrazine | 1582 | ±257 | 2079 | ±246 | 0.7609 | 0.1769 |
| 11.36/591.4505 | [2M+Na]+ | LysoPC | 13860 | ±3044 | 15690 | ±2914 | 0.8834 | 0.6686 |
| 7.93/476.2782 | [M+H]+ | LysoPE(18:3/0:0 | 4180 | ±782 | 4290 | ±749 | 0.9744 | 0.9197 |
| 7.72/536.3353 | [M+NH4]+ | LysoPC | 18170 | ±3099 | 16779 | ±2967 | 1.0829 | 0.7489 |
| 0.73/118.0866 | [M+H]+ | Betaine | 38525 | ±1786 | 44699 | ±1745 | 0.8619 | 0.0189 |
| 8.55/301.2172 | [M+H]+ | Kaurane diterpenoid **** | 7619 | ±915 | 5443 | ±876 | 1.3998 | 0.1004 |
| 0.72/279.1920 | [M+H]+ | alpha-CEHC | 17571 | ±1426 | 20209 | ±1365 | 0.8695 | 0.1958 |
| 9.94/502.2802 | [M+H]+ | LysoPE(0:0/20:4) | 1994 | ±129 | 2936 | ±124 | 0.6792 | <0.0001 |
| (*)LGR and HGR represent the two GG: low and high growth rate., respectively. (**) LS means ± Standard error (***)Fold change was calculated by dividing the mean intensity of the plasma metabolite in LGR by the mean intensity of the corresponding metabolite in HGR animals. (****) Ent-6,16-Kauradien-19-oic acid. | | | | | | | | |

| **Table S1:** Summary of feed intake and nutrient digestibility across growth genotypes (GG). | |
| --- | --- |
| **Variable** | **Mean*** |
| Daily feed intake (g/d); n=88 | 309 |
| *Apparent digestibility coefficients (%); n= 24* |  |
| Dry matter | 62.33 |
| Organic matter | 62.13 |
| Crude protein | 72.9 |
| Neutral digestible fiber | 27.6 |
| Acid digestible fiber | 13.20 |
| *No statistically significant differences were found between genetic lines (P > 0.05). | |
